# Supplementary material for: Sustaining community-based interventions for people affected by dementia long term: the SCI-Dem realist review
Source: PubMed Central journal article supplement — BMJ Open. 2021 Jul 7;11(7):e047789. doi: 10.1136/bmjopen-2020-047789 (PMC8264885; doi:10.1136/bmjopen-2020-047789), 2021-07-07
Supplement: bmjopen-2020-047789.draft_revisions.pdf [file bmjopen-2020-047789.draft_revisions.pdf]

# BMJ Open

BMJ Open is committed to open peer review. As part of this commitment we make the peer review history of every article we publish publicly available.

When an article is published we post the peer reviewers' comments and the authors' responses online. We also post the versions of the paper that were used during peer review. These are the versions that the peer review comments apply to.

The versions of the paper that follow are the versions that were submitted during the peer review process. They are not the versions of record or the final published versions. They should not be cited or distributed as the published version of this manuscript.

BMJ Open is an open access journal and the full, final, typeset and author-corrected version of record of the manuscript is available on our site with no access controls, subscription charges or pay-per-view fees (<http://bmjopen.bmj.com>).

If you have any questions on BMJ Open's open peer review process please email [info.bmjopen@bmj.com](mailto:info.bmjopen@bmj.com)

# BMJ Open

## Sustaining community-based interventions for people affected by dementia long term: The SCI-Dem realist review

|                               |                                                                                                                                                                                                                                                                                                                                |
|-------------------------------|--------------------------------------------------------------------------------------------------------------------------------------------------------------------------------------------------------------------------------------------------------------------------------------------------------------------------------|
| Journal:                      | <i>BMJ Open</i>                                                                                                                                                                                                                                                                                                                |
| Manuscript ID                 | bmjopen-2020-047789                                                                                                                                                                                                                                                                                                            |
| Article Type:                 | Original research                                                                                                                                                                                                                                                                                                              |
| Date Submitted by the Author: | 08-Dec-2020                                                                                                                                                                                                                                                                                                                    |
| Complete List of Authors:     | Morton, Thomas; University of Worcester, Association for Dementia Studies<br>Wong, Geoffrey; Oxford University, Nuffield Department of Primary Care Health Sciences<br>Atkinson, Teresa; University of Worcester, Association for Dementia Studies<br>Brooker, Dawn; University of Worcester, Association for Dementia Studies |
| Keywords:                     | Health policy < HEALTH SERVICES ADMINISTRATION & MANAGEMENT, Organisation of health services < HEALTH SERVICES ADMINISTRATION & MANAGEMENT, Dementia < NEUROLOGY, Old age psychiatry < PSYCHIATRY, SOCIAL MEDICINE                                                                                                             |
|                               |                                                                                                                                                                                                                                                                                                                                |

SCHOLARONE™  
Manuscripts

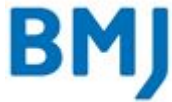

I, the Submitting Author has the right to grant and does grant on behalf of all authors of the Work (as defined in the below author licence), an exclusive licence and/or a non-exclusive licence for contributions from authors who are: i) UK Crown employees; ii) where BMJ has agreed a CC-BY licence shall apply, and/or iii) in accordance with the terms applicable for US Federal Government officers or employees acting as part of their official duties; on a worldwide, perpetual, irrevocable, royalty-free basis to BMJ Publishing Group Ltd ("BMJ") its licensees and where the relevant Journal is co-owned by BMJ to the co-owners of the Journal, to publish the Work in this journal and any other BMJ products and to exploit all rights, as set out in our [licence](#).

The Submitting Author accepts and understands that any supply made under these terms is made by BMJ to the Submitting Author unless you are acting as an employee on behalf of your employer or a postgraduate student of an affiliated institution which is paying any applicable article publishing charge ("APC") for Open Access articles. Where the Submitting Author wishes to make the Work available on an Open Access basis (and intends to pay the relevant APC), the terms of reuse of such Open Access shall be governed by a Creative Commons licence – details of these licences and which [Creative Commons](#) licence will apply to this Work are set out in our licence referred to above.

Other than as permitted in any relevant BMJ Author's Self Archiving Policies, I confirm this Work has not been accepted for publication elsewhere, is not being considered for publication elsewhere and does not duplicate material already published. I confirm all authors consent to publication of this Work and authorise the granting of this licence.

1  
2  
3  
4  
5  
6  
7  
8 **Sustaining community-based interventions for people affected by dementia**  
9 **long term: The SCI-Dem realist review**  
10  
11  
12  
13  
14  
15  
16

17 **Authors:**

18 **Thomas Morton**, Association for Dementia Studies, University of Worcester, Worcester, UK.

19 **Geoff Wong**, Nuffield Department of Primary Care Health Sciences, University of Oxford, Oxford, UK.

20 **Teresa Atkinson**, Association for Dementia Studies, University of Worcester, Worcester, UK.

21 **Dawn Brooker**, Association for Dementia Studies, University of Worcester, Worcester, UK.  
22  
23  
24  
25  
26  
27  
28  
29  
30  
31  
32

33 **Corresponding Author:**

34 **Professor Dawn Brooker**, Director of the Association for Dementia Studies, School of Allied Health  
35 and Community, University of Worcester, Henwick Grove, Worcester WR2 6AJ.  
36  
37  
38

39 Email: *d.brooker@worc.ac.uk*. Tel: 01905 855250  
40  
41  
42  
43  
44  
45  
46  
47  
48  
49  
50  
51  
52  
53  
54  
55  
56  
57  
58  
59  
60



## Sustaining community-based interventions for people affected by dementia long term: The SCI-Dem realist review

Thomas Morton<sup>1</sup> Geoff Wong<sup>2</sup> Teresa Atkinson<sup>1</sup> Dawn Brooker<sup>1</sup>

### ABSTRACT

**Objectives:** Community-based support for people with dementia and their care partners, such as regularly-meeting groups and activities, can play an important part in post-diagnostic care. Typically delivered piecemeal in the UK by a variety of agencies with inconsistent funding, provision is fragmented and many such interventions struggle to continue after only a short start-up period. This realist review investigates what can promote or hinder them in being able to sustain long-term.

**Methods:** Key sources of evidence were gathered using formal searches of electronic databases and grey literature, together with informal search methods such as citation tracking and snowballing. No restrictions were made on type of article or study design, but only data pertaining to regularly-meeting, ongoing, community-based interventions for those affected by dementia were included. Data were extracted, assessed, organised and synthesised and a realist logic of analysis applied to trace context-mechanism-outcome configurations as part an overall programme theory. Consultation with stakeholders, involved with a variety of such interventions in various roles, informed this process throughout.

**Results:** Ability to continually get and keep members; staff and volunteers; the support of other services and organisations; and funding/income were found to be critical in long-term sustainability, with multiple mechanisms feeding into these sub-outcomes, sensitive to context. These included an emphasis on socialising and person-centredness; lowering stigma and logistical barriers; providing satisfaction, support and recognition for personnel; networking, raising awareness and sharing with other organisations, while avoiding conflict; and skilled financial planning and management. Challenges were especially acute for small-scale and rural groups.

**Conclusions:** This review presents a theoretical model of the factors and mechanisms involved in the long term sustainability of community-based interventions. While the data used predated the COVID-19 pandemic, it can provide a framework for new research to look at what sustainability-impacting elements might have been affected, and how.

## Article Summary

- This review brings together transferrable learning from a wide range of intervention types on a topic that has received little formal, integrated research attention, to deepen our understanding on how such interventions could be implemented and supported to sustain more universally and consistently across the sector.
- This review's realist approach is well suited to accommodate and account for the complexity of such 'real life' intervention programmes, as implemented under different conditions in different settings, to extract transferable conclusions.
- This review was designed to gather evidence regarding how interventions can be sustained, not on the efficacy/effectiveness of interventions of this type, hence conclusions regarding the latter are beyond its scope.
- Literature was limited as this research question is not commonly the main focus of study in dementia care research.
- Not all of the data were of equal depth and detail or the highest empirical rigour, rather contributing together in a way that is useful to an overall programme theory that will benefit from further refinement and revision with empirical testing in subsequent research.

## Keywords

Dementia; Post-diagnosis; Peer support; Psychosocial; Implementation

## INTRODUCTION

Supporting people with dementia and their carers to live as well as possible in their communities, with timely psychosocial support, is a global public health goal,<sup>1</sup> though remains a challenging aspiration in many countries. In the UK, with an aging population<sup>2</sup> and increasing pressure on already-stretched health services<sup>3</sup> policy has for some time pointed to the need to move towards a model of social care where more people are cared for and supported at home, in the community. Improving provision of early, post-diagnosis support, support for family carers and support for integrated care (involving the voluntary and independent sectors) – all in a more dementia-friendly community environment – are contemporary UK Government priorities for dementia care.<sup>4</sup>

Support following a diagnosis of dementia is patchy,<sup>4</sup> however, with families in some areas lacking any formal proactive support beyond occasional contact with primary care and third sector. There are significant gaps in social care for people affected by dementia across the UK.<sup>5 6 7</sup> Multiple recent reports describe a climate where the state of social care provision – mainly delivered piecemeal by private and third-sector organisations – is “precarious and dysfunctional” in many parts of the country<sup>6</sup> and in some areas has “broken down” creating “care deserts”.<sup>5</sup> There is an associated reliance on informal carers (e.g. family members) to provide support but there is a growing recognition that informal carers’ own health and wellbeing is often negatively impacted by their caring activities.<sup>6</sup> The detrimental health impact of social isolation and loneliness is also increasingly being recognised,<sup>8 9</sup> with survey data revealing nearly 60% of people living with dementia report loneliness, isolation and losing touch with people in their lives since diagnosis, around a quarter feeling they are not part of their community and that people avoid them.<sup>7</sup> Family carers can also be subject to such loneliness and isolation.<sup>10</sup> This situation has only been exacerbated by the recent impact of COVID-19<sup>11</sup>, bringing the need for groups and activities that provide social connection and support for people and families affected by dementia into stark relief.

1  
2  
3  
4  
5  
6  
7  
8  
9  
10  
11  
12  
13  
14  
15  
16  
17  
18  
19  
20  
21  
22  
23  
24  
25  
26  
27  
28  
29  
30  
31  
32  
33  
34  
35  
36  
37  
38  
39  
40  
41  
42  
43  
44  
45  
46  
47  
48  
49  
50  
51  
52  
53  
54  
55  
56  
57  
58  
59  
60

There have been various attempts to mitigate these challenges in communities across the country, in the form of groups and activities for people with dementia and family carers. These aim to serve a number of functions: peer support, companionship and help for people to reintegrate with their communities; delivery of professional support, psychosocial interventions and physical exercise; a point of contact, signposting and referral for other services; or raising awareness and acting as a dementia-friendly community hub. The benefits of such community-based initiatives are now being recognised.<sup>12 13 14 15 16</sup> There is evidence that regular social activity, where people are able to leave their homes and gather together in a communal setting on a frequent and ongoing basis, can be helpful both for people living with dementia and the people who care for them.<sup>12 13 17 18 19</sup>

With care systems unprepared for the forecasted UK doubling of the number of people living with dementia (1.6 million) and tripling of social care costs by 2040,<sup>20</sup> improving provision of evidence-based community initiatives for people with dementia, and their families, is imperative.<sup>12 13 14 15 16 21 22</sup> However, even prior to the 2020 pandemic restrictions, such initiatives, groups and activities already faced a variety of challenges with long-term sustainability. These challenges and how to meet them are much talked about in the dementia care policy, rhetoric and practice arenas but have received very little research attention.

This realist review aims to deepen our understanding of what can help or hinder the long-term sustainability of regularly meeting, place-based community interventions, such as groups and activities, for people affected by dementia. It aims to use data gathered as the basis of evidence-informed recommendations for policy and practice.

## METHODS

This review was conducted from December 2018 to December 2020. A project protocol was registered with PROSPERO in March 2019<sup>23</sup> and the protocol was published in this journal in June 2019.<sup>24</sup>

1  
2  
3 The realist review is an interpretive, theory-driven approach to synthesising evidence from a  
4 range of sources, including qualitative, quantitative and mixed-methods research.<sup>25</sup> This approach is  
5 designed to accommodate and account for the complexity of 'real life' intervention programmes, as  
6 implemented under different conditions in different settings, aiming to explain how and why context  
7 can influence outcomes.<sup>26</sup> Hence it is well suited to extracting transferable lessons from reviewing  
8 the functioning and success (or otherwise) of a range of community-based interventions for people  
9 affected by dementia, as these are likely to involve a high level of complexity and be responsive to  
10 contextual factors which are likely to vary considerably from intervention to intervention. Data was  
11 gathered and synthesized, with a realist logic of analysis applied to identify causal chains involving  
12 different contexts, mechanisms and outcomes that can in turn affect an initiative's long-term  
13 sustainability. We define context as the conditions that trigger or modify the behaviour of  
14 mechanisms;<sup>27</sup> mechanisms are the usually-hidden processes that generate outcomes, defined as  
15 "underlying entities, processes, or structures which operate in particular contexts to generate  
16 outcomes of interest."<sup>28</sup>

17  
18  
19  
20  
21  
22  
23  
24  
25  
26  
27  
28  
29  
30  
31  
32  
33  
34  
35 Our review followed Pawson's five iterative stages<sup>29</sup> as outlined below.

### 36 37 38 *Step 1: Locating existing theories*

39  
40  
41 This initial step was to identify and gather existing ideas around what can help or hinder the  
42 sustainability of a group or activity, from those who have first-hand experience of them. In line with  
43 realist review guidelines (RAMESES),<sup>30</sup> stakeholders were contacted by TA and TM and consulted for  
44 input at points throughout the project. These stakeholders were lay experts involved with  
45 community-based interventions in various capacities, whether commissioning, leading, running,  
46 supporting or attending. In the first instance a workshop was held in March 2019 with a group of 13  
47 invited stakeholders to gather their content expertise on barriers and facilitators to engagement and  
48 sustainability. Eight others were subsequently consulted by TM individually, in person, by telephone  
49 or by email. Input was also taken by TA and TM from members and facilitators of various local DEEP  
50  
51  
52  
53  
54  
55  
56  
57  
58  
59  
60

1  
2  
3 (Dementia Engagement and Empowerment Project)<sup>31</sup> groups at a national meeting in June 2019, and  
4  
5 TM also visited three community groups in Herefordshire, Oxfordshire and Wolverhampton. In  
6  
7 addition, an exploratory search of the literature was conducted by TM, using informal methods such  
8  
9 as citation tracking and snow-balling<sup>32</sup> along with informal scoping searches<sup>33</sup> and the gathering of  
10  
11 relevant publications and materials recommended by stakeholders. Together, this contributed  
12  
13 towards the building of an initial theoretical model, or *programme theory*, with the guidance of GW,  
14  
15 prior to our main search, both to inform our formal search strategy and to be tested and refined by  
16  
17 the data subsequently found.  
18  
19

## 20 21 22 *Step 2: Search for evidence*

### 23 24 25 **Formal search**

26  
27 Formal searching activity took place between May and September 2019. A search strategy was  
28  
29 designed, piloted and conducted by the research team with the guidance from an information  
30  
31 specialist (CK) (see Supplementary file 1). The following databases were searched: Academic Search  
32  
33 Complete; AMED; CINAHL; EMBASE; MEDLINE; ProQuest; PsycINFO; PubMed; Scopus and Social Care  
34  
35 Online. In keeping with RAMESES guidelines,<sup>30</sup> no restrictions were made on the type of article or  
36  
37 study design eligible for inclusion, other than being more recent than 1990. Documents such as  
38  
39 editorials, opinion pieces, information guides, publicity materials, newspaper and magazine articles,  
40  
41 evaluation reports, PhD theses and research poster and slide presentations were included along with  
42  
43 peer-reviewed journal articles, if found to be holding relevant information.  
44  
45  
46  
47

48  
49 After removing duplicates, records were screened by title and abstract by TM using the  
50  
51 eligibility criteria, ensuring interventions covered were those targeted at people with dementia and  
52  
53 their families living in the community, that brought people together physically and met on a  
54  
55 frequent, regular and an on-going basis (these criteria are outlined in full detail in Supplementary file  
56  
57 2). Full text of documents were then obtained of the remaining records, and again screened by close  
58  
59 reading against the eligibility criteria by TM. A 10% random subsample of was reviewed  
60

1  
2  
3 independently at each of these stages by a second reviewer (TA) with disagreements recorded and  
4 resolved by discussion. Informal searching continued iteratively alongside the formal search and in  
5 response to articles found in it, congruent with the realist review process which allows searching to  
6 be revised as necessary as the review progresses.<sup>30</sup> In certain cases, documents regarding on  
7 interventions that met only some, not all, of the inclusion criteria were included if found to contain  
8 information on hypothesised mechanisms, with reason to believe such mechanisms may function  
9 similarly or analogously in types of intervention that are closely related.<sup>29</sup>

10  
11  
12  
13  
14  
15  
16  
17  
18  
19 *Steps 3 and 4: Article selection, data extraction and organisation*

20  
21  
22 Figure 1 shows a PRISMA diagram outlining the full screening and selection process.

23  
24  
25 **[Figure 1 here]**

26  
27  
28 Following screening and close-reading of full texts for eligibility, full texts of the remaining  
29 122 articles were loaded into NVivo qualitative data analysis software to help locate and categorise  
30 (code) relevant sections of text containing data regarding contexts, mechanisms or outcomes  
31 pertinent to the long-term sustainability of the intervention they described. Coding was both  
32 inductive (codes created in response to data as found) and deductive (codes created in advance,  
33 informed by the initial programme theory) and carried out by TM. The characteristics of the articles  
34 were also extracted separately into an EXCEL spreadsheet.

35  
36  
37  
38  
39  
40  
41  
42  
43  
44  
45 During this extraction and organisation process, more fine-grained assessments of relevance  
46 (to answering the research question) and rigour (the trustworthiness and credibility of the data and  
47 its source)<sup>25 34</sup> were made by TM, with a random sample of 10% of articles again selected, assessed  
48 independently and discussed with TA. The data an article contained was assessed on its own merits,  
49 not on that of the paper or study as a whole. This is because it was recognised that poorly designed  
50 or conducted research may still contain good quality 'nuggets' of information for a realist review,<sup>34</sup>  
51  
52  
53  
54  
55  
56  
57  
58  
59  
60  
35 or a document meeting inclusion criteria may not contain any relevant data. Due to the variety

1  
2  
3 and breadth of the type of article included in the review, a standardised relevance and rigour  
4  
5 assessment tool that would be appropriate in all cases was impossible to design.<sup>25</sup> Rather a set of  
6  
7 general principles was agreed to guide a 'traffic light' assessment system of low, medium and high  
8  
9 relevance, and low, medium and high rigour (see Supplementary file 2 for detail). Reasons for each  
10  
11 assessment were outlined and logged for each article, and compared with each other to ensure  
12  
13 consistency. Ambiguous cases of relevance or rigour were discussed with the wider project team as  
14  
15 they arose. A decision was made by the project team to exclude articles assessed to have data of low  
16  
17 relevance or low rigour to ensure a more robust data-set with which to build the final programme  
18  
19 theory and context-mechanism-outcome configurations.  
20  
21  
22

#### 23 24 *Step 5: Synthesising the evidence and drawing conclusions*

25  
26  
27 Once data from the remaining articles were extracted and categorised, key outcome themes were  
28  
29 identified by discussion with the whole team. These themes and categories were presented to the  
30  
31 stakeholders for comment and feedback, to determine what was most important to focus upon, if  
32  
33 they felt anything had been overlooked and if any changes or refinements should be made. Four key  
34  
35 outcome areas (getting and keeping members, personnel, support of other organisations and  
36  
37 funding/income) were settled upon. Data was then organised under these headings in the form of  
38  
39 "if-then" statements that provided initial explanations of how, why, for whom and in which contexts  
40  
41 these outcomes might arise, initially by TM but with input from DB and TA. These were then further  
42  
43 refined, with guidance from GW, using a realist logic of analysis to identify cause-and-effect chains in  
44  
45 the data and finally elaborated into context-mechanism-outcome configurations (CMOCs).<sup>30</sup> Related  
46  
47 CMOCs were then grouped together to create recommendations for practice or policy that also  
48  
49 acted as a summary of the CMOCs found. Diagrams of the factors found affecting sustainability, and  
50  
51 how they are likely to relate to each other within an overall programme theory, were also designed  
52  
53 through team discussion and drawn by TM.  
54  
55  
56  
57  
58  
59  
60



## RESULTS

In total, 61 articles were coded to develop the CMOCs used to refine and expand our initial programme theory (see Supplementary file 3 for a detailed list of included articles). They were published between 1990 and 2020, and ranged in type: most were either peer-reviewed journal articles (28) or formal reports/evaluations (18); information guides (8), news feature articles (3), doctoral theses (2) and conference presentation paraphernalia (2) were also analysed. About half of these articles (33) were authored (or co-authored) in the UK, consistent with a proportion being identified informally through UK-based stakeholders (see Figure 2). Four articles had international authorship. Other countries of origin (or co-origin) comprised the US (8), Netherlands (7), Germany (5), Canada (4), Italy (4), Norway (3), Poland (3), Australia (2), Ireland (2), Sweden (2), Chile (1), Japan (1), Portugal (1) and Thailand (1). The type of intervention discussed in these articles varied broadly, including: day centres/day care, social activities, sports and exercise initiatives, peer support groups, arts and crafts groups, singing and music groups, cognitive stimulation, gardening activities and other outdoor activities. Many interventions had multiple and overlapping elements: for example a sports activity may have a social function, a drop-in day centre may have exercise and cognitive stimulation activities or a craft club may have peer support built in. When an article's remit was general (for example community support services, outdoor activities, social and leisure activities or third sector groups) the data included from the article was only that which was relevant to our programme theory and the kind of interventions outlined in the inclusion criteria (see Supplementary file 2).

Our analysis, together with stakeholder input, identified four critical areas affecting the sustainability of an intervention: members, staff and volunteers, support of other organisations and funding/income. These were each sub-divided into "getting" and "keeping" outcomes in recognition of changes in focus over time regarding these areas, and likely different contexts and mechanisms involved as an intervention continues. Figure 2 shows an overview of factors leading to the getting

1  
2  
3 and keeping of members, staff and volunteers, support of other organisations and funding/income,  
4  
5 found in the article data (individual diagrams tracing factors for each critical area can be found in  
6  
7 Supplementary file 4).  
8  
9

10 **[Figure 2 here]**

11  
12  
13 Our analysis of the data produced 201 CMOCs (outlined in full in Supplementary file 5), all  
14  
15 covered by the above eight sub-divisions. These CMOCs provide causal explanations relating to  
16  
17 sustainability of community-based groups and activities either at the level of the individual,  
18  
19 organisation or wider. Due to the high number of CMOCs, they were further organised by grouping  
20  
21 them under practical recommendations that could follow. These recommendations are not simply  
22  
23 an end conclusion, but were also part of the data synthesizing process, as they act as a way in which  
24  
25 to categorise and summarise the large number of CMOCs. Examples of how a number of grouped  
26  
27 CMOCs were related to a recommendation can be seen in Table 1.  
28  
29  
30  
31

32 **[Table 1 here]**

### 33 **Recommendations for practice**

34  
35 In total, 41 recommendations for practice were drawn from the CMOCs as can be seen in Table 2.  
36  
37  
38  
39

40 **[Table 2 here]**

41  
42  
43 Data regarding getting and keeping members was the most abundant and showed most  
44  
45 consensus. As may be expected, boosting the motivation and understanding of potential referrers,  
46  
47 while lowering bureaucratic and logistical barriers, was important to getting members (CMOC 10-  
48  
49 CMOC 14; CMOC 31-CMOC 46; CMOC64-CMOC 65). Transport from home to venue was particularly  
50  
51 key: not just its availability, but people's experiences of the accessibility, appropriateness and  
52  
53 convenience of it (CMOC 10-CMOC 14). Other salient mechanisms involved how respected, valued  
54  
55 and comfortable members felt, or perceived they would feel should they attend: both for  
56  
57 overcoming initial anxiety and stigma and fostering a happy, cohesive group (CMOC 3-CMOC 9;  
58  
59  
60

1  
2  
3 CMOC 15-CMOC 24; CMOC 53-CMOC 63; CMOC 71-CMOC72). Staff attitudes and a comfortable,  
4  
5 accessible venue play a role in this, but also planned practices, such as involving members in decision  
6  
7 making (CMOC 58-CMOC 63), differentiating activities for need and ability (CMOC 21- CMOC24;  
8  
9 CMOC 66-CMOC 70) and ensuring enough opportunity and time for socialising (reported to be of  
10  
11 high importance to people no matter what the intervention or activity) (CMOC 1-CMOC 2; CMOC 47-  
12  
13 CMOC 52). The stability and reliability of an intervention was also important, though often at odds  
14  
15 with nature of groups run informally with few personnel and unstable income (CMOC 73-CMOC 77).  
16  
17 Overall, ensuring individual wants and needs are met – that people they feel they are gaining  
18  
19 something useful and appropriate to them in particular – was important to keeping members long-  
20  
21 term (CMOC 47-CMOC 72).  
22  
23  
24  
25

26 Data regarding getting and keeping staff and volunteers was least abundant of the four  
27  
28 critical outcome areas, though working with other organisations was frequently alluded to as helpful  
29  
30 in finding personnel (CMOC 78-CMOC 83). Data regarding skills of personnel was largely around the  
31  
32 role of communication and collaboration in creating an encouraging and effective environment for  
33  
34 staff and volunteers (CMOC 84-CMOC 97). Context was key with regards to the availability of  
35  
36 potential volunteers in the local population, as this could be very different depending on location  
37  
38 (e.g. rural or urban), with different likely mechanisms requiring different approaches to finding and  
39  
40 encouraging volunteers from different demographic groups (CMOC 84-CMOC 90). With regard to  
41  
42 keeping volunteers, issues raised included the importance of maintaining work satisfaction and  
43  
44 avoiding burnout, and having financial support available (CMOC 98-CMOC 108).  
45  
46  
47  
48

49 Getting and keeping support of other organisations, such as other community groups, health  
50  
51 and social care services, third sector bodies, local authorities and local businesses was a widely  
52  
53 recurring theme in the data. Actively involving other organisations, minimising overlap, sharing  
54  
55 knowledge and resources and offering something of benefit were all ways to encourage them to feel  
56  
57 invested in supporting an intervention rather than threatened or indifferent to it (CMOC 122-CMOC  
58  
59  
60

1  
2  
3 131), in addition to pro-active awareness raising and networking (CMOC 110-CMOC 121). Good  
4  
5 collaboration planning, with expert advice on collaborative working and continual attention to  
6  
7 maintaining communication were strategies to avoid problems developing or loss of enthusiasm  
8  
9 with partner organisations (CMOC 138-CMOC 152).  
10  
11

12  
13 On getting and keeping funding and income, salient CMOCs again involved continual  
14  
15 networking and communication, for the reason that this would support multiple mechanisms: by  
16  
17 reducing costs through sharing and partnership; boosting visibility, legitimacy and value in the eyes  
18  
19 of potential and existing funders; and helping to locate more funding and income opportunities  
20  
21 (CMOC 153-CMOC 175; CMOC 185-CMOC 190). Data made some reference to the importance of  
22  
23 strategic planning in finding and managing funds, with outside expertise and dedicated personnel  
24  
25 helpful in carrying this out (CMOC 170-CMOC 175; CMOC 191-CMOC 197). While tailoring an  
26  
27 intervention to national (and therefore funders') priorities may increase its chances of obtaining  
28  
29 funding, this is not always possible or desirable for a group (CMOC 180-CMOC 184). Groups in rural  
30  
31 areas particularly, or experienced groups unable to find anything but short-term solutions, may have  
32  
33 to raise greater awareness with commissioners and policy-makers about the specific challenges that  
34  
35 face them, and lobby for change to ensure better conditions for groups in their situation long term  
36  
37 (CMOC 170-CMOC 179; CMOC 198-CMOC 201). For example rural groups with a small number of  
38  
39 members and personnel can struggle to meet funders demands, especially if put in competition with  
40  
41 larger, well-resourced organisations.  
42  
43  
44  
45

#### 46 47 **Recommendations for policy and commissioning**

  
48

49  
50 In addition, 13 recommendations for policy-making and commissioning were also drawn (see Table  
51  
52 3), for the most part mirroring those for practice and drawing on the same CMOCs.  
53  
54

55 **[Table 3 here]**  
56  
57  
58  
59  
60

1  
2  
3 The final recommendation covers CMOCs unique to policy-making and commissioning,  
4 highlighting issues such as the detrimental effect of a disjoin between national policy and local need  
5 on an intervention finding support (as by adhering to one they will neglect the other) (CMOC 132).  
6  
7 Practices that could benefit the sustainability of community interventions included ring-fencing  
8 funding specifically for dementia-targeted community initiatives; commissioning health and social  
9 care services to work with community initiatives; and developing health pathways around existing  
10 community networks (CMOC 133-CMOC 135). National and official organisations can also encourage  
11 a more strategic, joined up direction regarding community-based dementia support by showing  
12 leadership in working with smaller, local initiatives and support for potential private sector partners  
13 (CMOC 136-CMOC 137).  
14  
15  
16  
17  
18  
19  
20  
21  
22  
23  
24  
25

## 26 **DISCUSSION**

### 27 **Summary of findings**

28  
29  
30  
31  
32 Being able to continually get and hold on to members, staff and volunteers, the support of other  
33 services and organisations, and funding/income are the key factors in the long-term sustainability of  
34 a community-based intervention for people affected by dementia. There are multiple mechanisms  
35 that feed into these sub-outcomes, sensitive to context. Ability to attract members was found to be  
36 driven by perceptions that a group or activity was “for them”, and expectations they would be  
37 welcomed, respected and supported without stigma once attending, as well as having motivated  
38 referrers and low logistical barriers including transport. Members are more likely to keep attending if  
39 feeling comfortable, at home, respected and empowered, with individual needs understood.  
40  
41  
42  
43  
44  
45  
46  
47  
48  
49

50 Opportunity to socialising was found to be of high importance no matter what intervention type,  
51 with stability and reliability also important. Networking and outreach were found to be important in  
52 getting staff and volunteers; feeling satisfied, valued and supported (including financially) was  
53 important in keeping them. Proactive measures to raise awareness and involve other organisations,  
54 avoiding conflict and sharing knowledge and resources, were found to help in securing essential  
55  
56  
57  
58  
59  
60

1  
2  
3 support, though requiring significant maintenance through skilled communication, planning and  
4 working practices. Such networking and collaboration was found to be helpful in finding and  
5  
6 securing funding and income, with skilled planning and management of multiple income streams  
7  
8 helpful in sustaining long term. However, the often short term nature of funding was found to be a  
9  
10 barrier to retaining deep learning and experience, and disjoints between national policy and local  
11  
12 need a barrier to securing both funding and wider support. Challenges in meeting funders  
13  
14 requirements and overcoming logistical barriers were especially acute for small-scale and rural  
15  
16 groups.  
17  
18  
19  
20  
21

### 22 **Strengths and limitations**

23  
24  
25 This review was designed to gather evidence regarding how regularly-meeting community-based  
26  
27 interventions for people affected by dementia can be sustained, not on the efficacy/effectiveness of  
28  
29 interventions of this type, hence conclusions regarding the latter are beyond its scope. Literature  
30  
31 was limited as this research question is not commonly the main focus of study in dementia care  
32  
33 research. This meant some CMOCs arrived at were the result of abundant data sources, while others  
34  
35 were not, hence the CMOCs here vary in robustness (see Supplementary file 5). While efforts were  
36  
37 made to exclude data of low rigour (see Supplementary file 2), it is the nature of a realist review to  
38  
39 include data from a variety of source types to build a theoretical model piecemeal; not all of the data  
40  
41 were of equal depth and detail and many will not meet the highest level of empirical rigour, rather  
42  
43 they contribute together in a way that is useful to the theoretical constructs that are the CMOCs and  
44  
45 overall programme theory.<sup>29</sup> The results of this review therefore should be taken as theory and sit in  
46  
47 relation to other research: SCI-Dem provides a theoretical framework which can be put to the test  
48  
49 and further refines by subsequent empirical research.<sup>29</sup> The breadth of intervention types covered in  
50  
51 this review is on the one hand a strength, as it has enabled the surfacing of commonalities in  
52  
53 experience likely relevant to a wide range of real-world initiatives broadly in the same category; on  
54  
55 the other hand, it means this review cannot be specific on certain details. An example is that little  
56  
57  
58  
59  
60

1  
2  
3 could be concluded on the cost-effectiveness or economic functioning of the interventions covered,  
4  
5 because details were both too scant and too specific to draw robust CMOCs that might usefully be  
6  
7 applicable to others.  
8  
9

## 10 11 **Recommendations and comparison with existing literature**

12  
13  
14 Recommendations for practice and policy are presented in Tables 2 and 3 in the results section.  
15  
16 However, they also highlight some common problems for which there may be no easy solution: for  
17  
18 example what to do in rural areas where public transport coverage is poor and potential members  
19  
20 and volunteers are few and widespread, given that transport to venue is a key factor in getting and  
21  
22 keeping members. The issue of whether interventions can be entirely self-sustaining or must rely on  
23  
24 service-level agreements and grant funding is also a key one. This review suggests that costs can be  
25  
26 reduced and income opportunities found by pro-active networking and collaborative working;  
27  
28 though rather than removing the need for grant funding, this is more likely useful in leveraging it,  
29  
30 adding to it and helping it to go further. Recent research into whether social enterprises delivering  
31  
32 adult social care services (not dementia specific) could be self-sustaining suggests that marketing is  
33  
34 key, but needs to focus upon building relationships with stakeholders at multiple levels rather than  
35  
36 adopting an approach akin to selling a product:<sup>97</sup> networking and marketing are closely bound up  
37  
38 with each other. Delivering social quality as well as service quality, having a hybrid workforce and  
39  
40 diverse income streams to strengthen financial viability and reduce reliance on grants were also  
41  
42 found to help<sup>98</sup>. This review echoes all of these points with regards to dementia-targeted  
43  
44 community-based interventions, in particular that interventions cannot sustain without a cultivated  
45  
46 support network around them, as well as careful collaborative financial planning and management.  
47  
48  
49  
50  
51  
52

53  
54 The emphasis found in this review on the value to members of social activity and a  
55  
56 respectful, empowering person-centred approach, reinforces the benefits of community-based  
57  
58 initiatives and regular social activity, both for people living with dementia and the people who care  
59  
60

1  
2  
3 for them.<sup>12 13 14 15 16 17 18 19</sup> However, the time-limited nature of most research in this area is unhelpful  
4  
5 when seeking data on the long-term sustainability of such interventions, with a large number of  
6  
7 articles excluded from this review due to this. Recent systematic reviews have found that  
8  
9 psychosocial interventions tend to be short term, with short-term trials only measuring short-term  
10  
11 impact, and a pressing need for more longer-term studies with larger sample sizes.<sup>14 99</sup> However,  
12  
13 there is a “chicken and egg” problem: if policy and commissioning is hesitant to support  
14  
15 interventions unless there is evidence of robust statistical effects, then such interventions will  
16  
17 struggle to sustain long enough, in enough abundance, to have the numbers to carry out the  
18  
19 research required to produce that evidence. Equally, if research focuses only on  
20  
21 efficacy/effectiveness without attention to the implementation process, and reporting of how costs  
22  
23 were met and resources, personnel, and service users were found, then little can be learnt about  
24  
25 sustaining them.  
26  
27  
28  
29

### 30 31 **Future research directions** 32

33  
34 When drafting inclusion criteria for this review in 2018 it was decided to focus upon interventions  
35  
36 that brought people together to meet physically and socially, as distinct from community services  
37  
38 that go into people’s homes. It did not take into account virtual community activities or communities  
39  
40 at-a-distance, which at the time seemed like a distinct niche. In 2020, however, this kind of activity  
41  
42 has become much more important, and integrated with the activities of existing community groups  
43  
44 that met physically prior to the COVID-19 pandemic. With COVID-19 the landscape for community-  
45  
46 based interventions has changed significantly, presenting further unprecedented challenges, but the  
47  
48 need for groups that connect people socially remains acute. A recent study by the Alzheimer's  
49  
50 Society<sup>11</sup> revealed COVID-19 restrictions have had particularly negative impacts on the health and  
51  
52 well-being of people affected by dementia and their carers, a finding echoed by the Alzheimer’s  
53  
54 Disease International’s update report for 2020.<sup>100</sup> Restrictions have forced changes to routine,  
55  
56 causing anxiety and strain in relationships; led to a reduction in skills and confidence; and increased  
57  
58  
59  
60



1  
2  
3 pressure on home carers, not least through the erosion of support systems.<sup>101</sup> Many support  
4  
5 initiatives will have ceased operating either temporarily or permanently. As the effects of the  
6  
7 pandemic continue to be felt, there is an urgent need for community-based interventions to find  
8  
9 ways to keep going or re-establish quickly when emerging from COVID-19 restrictions. While the  
10  
11 data used in this review predated the pandemic, it can provide a framework for new research to look  
12  
13 at what sustainability-impacting elements have been affected and how. This review presents a  
14  
15 theoretical model of the factors and mechanisms involved in the long term sustainability of  
16  
17 community-based interventions. As such it is for further research to put this model to the test by  
18  
19 comparing it empirically with real-world interventions going forward, which will further refine and  
20  
21 add to this programme theory in a post-pandemic climate.  
22  
23  
24  
25  
26  
27  
28

29 **Word count: 4684**

### 30 31 32 **Figure legends**

33  
34  
35 **Figure 1** PRISMA flow diagram

36  
37  
38 **Figure 2** Factors affecting the sustainability of community-based groups and activities

### 39 40 41 **Author affiliations and email**

42  
43 1 Association for Dementia Studies, University of Worcester, Worcester, UK. *t.morton@worc.ac.uk*

44  
45 2 Nuffield Department of Primary Care Health Sciences, University of Oxford, Oxford, UK.

46  
47 *geoffrey.wong@phc.ox.ac.uk*

48  
49  
50  
51 1 Association for Dementia Studies, University of Worcester, Worcester, UK. *t.atkinson@worc.ac.uk*

52  
53  
54 1 Association for Dementia Studies, University of Worcester, Worcester, UK. *d.brooker@worc.ac.uk*

1  
2  
3 **Author Contributions** DB and TA conceptualised the study along with Dr Shirley Evans (Association  
4 for Dementia Studies, University of Worcester) with input from GW, TM and Clive Kennard  
5  
6 (Information specialist, University of Worcester). The study was conducted by DB as principal  
7  
8 investigator, TA as project manager, TM research associate and GW providing methodological  
9  
10 expertise. TM wrote the first draft of this manuscript. GW, DB and TA critically contributed to and  
11  
12 refined this manuscript. All authors have read and approved the final manuscript.  
13  
14  
15

16  
17 **Corresponding Author** Professor Dawn Brooker, Director of the Association for Dementia Studies,  
18  
19 School of Allied Health and Community, University of Worcester, Henwick Grove, Worcester WR2  
20  
21 6AJ. Email: [d.brooker@worc.ac.uk](mailto:d.brooker@worc.ac.uk). Tel: 01905 855250  
22  
23

24 **Twitter** Follow Thomas Morton @ThomasMortonADS  
25  
26

27 **Original protocol:** <http://dx.doi.org/10.1136/bmjopen-2019-032109>  
28  
29

30 **Funding:** This work was supported by The Alzheimer's Society, Grant No: 402, AS-PG-17b-023  
31  
32

33 **Acknowledgements** This project was funded by the Alzheimer's Society. Dr Shirley Evans  
34  
35 (Association for Dementia Studies, University of Worcester) contributed to the writing of the  
36  
37 protocol for this review. Clive Kennard (information specialist, University of Worcester), helped  
38  
39 design, pilot and carry out the formal search. The authors would like to thank all those who shared  
40  
41 their invaluable experience and contributed to advising and guiding this project as a stakeholder  
42  
43 consultant: Philly Hare, Rachael Litherland, Damian Murphy and Rachel Niblock of DEEP/Innovations  
44  
45 in Dementia, and all who attended the national meeting of DEEP groups at Woodbrooke,  
46  
47 Birmingham, July 2019; Dory, James McKillop and Dreane Williams of DEEP; Judith Baron and the  
48  
49 Face It Together group; Jill Turley and The Buddys group; Kim Badcock of Kim's Cafe (Denmead,  
50  
51 Havant and Waterlooville, Hampshire); Jo Barrow and the Forget Me Not Lunch and Friendship Club  
52  
53 (Bicester, Oxfordshire); Elizabeth Bartlett of the Laverstock Memory Support Group (Wiltshire);  
54  
55 Shirley Bradley of Friends of the Elderly (Worcester); David Budd of Our Connected Neighbourhoods  
56  
57  
58  
59  
60

1  
2  
3 (Stirling); Di Burbidge of Liverpool DAA Diversity Sub-Group and Chinese Wellbeing (Liverpool);  
4  
5 Kishwar Butt of the South Asian Ladies' Milaap Group (Wolverhampton); Michelle Candlish of  
6  
7 Ceartas Advocacy (Kirkintilloch, East Dunbartonshire); Annette Darby of Briery Hill Health and Social  
8  
9 Care Centre (West Midlands); Sue Denman of Solva Care (Haverfordwest); Gerry Fouracres of  
10  
11 Scrubditch Farm, Cirencester; Graham Galloway of Kirrie Connections (Kirriemuir, Angus); Reinhard  
12  
13 Guss; Deborah Harrold of Agewell CIC (Oldbury, West Midlands); June Hennell; Jacoba Huizenga of  
14  
15 Health and Social Care in Communities, Utrecht (Netherlands); Lynden Jackson of the Debenham  
16  
17 Project (Suffolk); Cheryl Poole of Leominster Meeting Centre; Anita Tomaszewski and Jennifer  
18  
19 Williams of Me, Myself and I (Briton Ferry, Neath Port Talbot); Dame Louise Robinson; Droitwich  
20  
21 Meeting Centre; Leominster Meeting Centre; the members of the UKMCSP National Reference  
22  
23 Group; and Jennifer Bray, Shirley Evans, Nicola Jacobson-Wright, Chris Russell and Mike Watts of the  
24  
25 Association for Dementia Studies, University of Worcester.  
26  
27  
28  
29  
30

31 **Competing interests** Geoff Wong is Deputy Chair of the National Institute for Health Research Health  
32  
33 Technology Assessment Prioritisation Committee: Integrated Community Health and Social Care (A).  
34  
35

36 **Disclaimer** The views and opinions expressed therein are those of the authors and do not necessarily  
37  
38 reflect those of the Alzheimer's Society.  
39  
40

41 **Ethics approval** This project has been reviewed by the University of Worcester College of Health, Life  
42  
43 and Environmental Sciences Research Ethics Panel.  
44  
45

46 **PROSPERO registration number** CRD42019125889.  
47  
48

49 **Open Access** This is an Open Access article distributed in accordance with the terms of the Creative  
50  
51 Commons Attribution (CC BY 4.0) license, which permits others to distribute, remix, adapt and build  
52  
53 upon this work, for commercial use, provided the original work is properly cited. See: [http://](http://creativecommons.org/licenses/by/4.0/)  
54  
55 [creativecommons.org/licenses/by/4.0/](http://creativecommons.org/licenses/by/4.0/)  
56  
57  
58  
59  
60

## REFERENCES

1. World Health Organisation. *Global action plan on the public health response to dementia 2017-2025*. Geneva: world Health Organisation, 2017. [https://www.who.int/mental\\_health/neurology/dementia/action\\_plan\\_2017\\_2025/en/](https://www.who.int/mental_health/neurology/dementia/action_plan_2017_2025/en/)
2. Office for National Statistics (ONS). *Living longer: Caring in later life*. London: ONS, 2019. <https://www.ons.gov.uk/peoplepopulationandcommunity/birthsdeathsandmarriages/ageing/articles/livinglongerhowourpopulationischangingandwhyitmatters/2019-03-15>
3. Care Quality Commission. *The state of health care and adult social care in England 2018/19*. Newcastle-upon-Tyne: Care Quality Commission, 2019. [https://www.cqc.org.uk/sites/default/files/20191015b\\_stateofcare1819\\_fullreport.pdf](https://www.cqc.org.uk/sites/default/files/20191015b_stateofcare1819_fullreport.pdf)
4. Department of Health. *Prime Minister's challenge on dementia 2020*. London: Department of Health, 2015. [https://assets.publishing.service.gov.uk/government/uploads/system/uploads/attachment\\_data/file/414344/pm-dementia2020.pdf](https://assets.publishing.service.gov.uk/government/uploads/system/uploads/attachment_data/file/414344/pm-dementia2020.pdf)
5. Incisive Health. *Care deserts: the impact of a dysfunctional market in adult social care provision*. London: Incisive Health, 2019: <https://www.incisivehealth.com/wp-content/uploads/2019/05/care-deserts-age-uk-report.pdf>
6. Age UK. *Briefing: Health and Care of Older People in England 2019*. London: Age UK, 2019. [https://www.ageuk.org.uk/globalassets/age-uk/documents/reports-and-publications/reports-and-briefings/health--wellbeing/age\\_uk\\_briefing\\_state\\_of\\_health\\_and\\_care\\_of\\_older\\_people\\_july2019.pdf](https://www.ageuk.org.uk/globalassets/age-uk/documents/reports-and-publications/reports-and-briefings/health--wellbeing/age_uk_briefing_state_of_health_and_care_of_older_people_july2019.pdf)
7. Alzheimer's Society. *A lonely future: 120,000 people with dementia living alone, set to double in the next 20 years*. London: Alzheimer's Society, 2019. <https://www.alzheimers.org.uk/news/2019-05-15/lonely-future-120000-people-dementia-living-alone-set-double-next-20-years>
8. Cornwell EY, Waite, LJ. Social disconnectedness, perceived isolation and health among older adults. *J Health Soc Behav* 2009;50(1):31–48. doi.org/10.1177/002214650905000103
9. Holt-Lunstad J, Smith TB, Baker M, Harris T, Stephenson D. Loneliness and social isolation as risk factors for mortality: A meta-analytic review. *Perspect Psychol Sci* 2015;10(2):227–237. doi.org/10.1177/1745691614568352
10. Brodaty H, Donkin M. Family carers of people with dementia. *Dialogues Clin Neurosci* 2009;11(2):217–228.
11. Alzheimer's Society. *Worst hit: Dementia during coronavirus*. London: Alzheimer's Society, 2020. <https://www.alzheimers.org.uk/sites/default/files/2020-09/Worst-hit-Dementia-during-coronavirus-report.pdf>
12. Brooker D, Evans SC, Evans SB, *et al*. Evaluation of the implementation of the Meeting Centres Support Program in Italy, Poland, and the UK; exploration of the effects on people with dementia. *Int J Geriatr Psychiatry* 2018;33(7):883-892. doi: 10.1002/gps.4865.
13. Evans SB, Evans SC, Brooker D, *et al*. The impact of the implementation of the Dutch combined Meeting Centres Support Programme for family caregivers of people with dementia in Italy, Poland and UK. *Aging Ment Health* 2018; doi: 10.1080/13607863.2018.1544207
14. Lord K, Beresford-Dent J, Rapaport P, *et al*. Developing the New Interventions for Independence in Dementia Study (NIDUS) theoretical model for supporting people to live well with dementia at home for longer: a systematic review of theoretical models and Randomised Controlled Trial evidence. *Soc Psychiatry Psychiatr Epidemiol* 2019; doi: 10.1007/s00127-019-01784-w
15. McDermott O, Charlesworth G, Hogervorst E, *et al*. Psychosocial interventions for people with dementia: a synthesis of systematic reviews. *Aging Ment Health* 2019;23(4):393–403. doi: 10.1080/13607863.2017.1423031
16. Van't Leven N, Prick AE, Groenewoud JG, *et al*. Dyadic interventions for community-dwelling people with dementia and their family caregivers: a systematic review. *Int Psychogeriatr* 2013;25(10):1581-1603.
17. Dröes RM, Van Mierlo LD, Meiland FJM, Van der Roest HG. Memory problems in dementia: Adaptation and coping strategies, and psychosocial treatments. *Expert Rev Neurother* 2011;11(12):1769-1782.
18. Dröes RM, Meiland F, Schmitz MJ, Van Tilburg W. Effect of combined support for people with dementia and carers versus regular day care on behaviour and mood of persons with dementia: Results from a multi-centre implementation study. *Int J Geriatr Psychiatry* 2004;19(7):673-684.
19. Dröes RM, Meiland FJM, Schmitz MJ, Van Tilburg W. Effect of the Meeting Centres Support Program on informal carers of people with dementia: Results from a multi-centre study. *Aging Ment Health* 2006;10(2):112-124.

- 1
  - 2
  - 3
  - 4
  - 5
  - 6
  - 7
  - 8
  - 9
  - 10
  - 11
  - 12
  - 13
  - 14
  - 15
  - 16
  - 17
  - 18
  - 19
  - 20
  - 21
  - 22
  - 23
  - 24
  - 25
  - 26
  - 27
  - 28
  - 29
  - 30
  - 31
  - 32
  - 33
  - 34
  - 35
  - 36
  - 37
  - 38
  - 39
  - 40
  - 41
  - 42
  - 43
  - 44
  - 45
  - 46
  - 47
  - 48
  - 49
  - 50
  - 51
  - 52
  - 53
  - 54
  - 55
  - 56
  - 57
  - 58
  - 59
  - 60
20. Wittenberg R, Hu B, Barraza-Araiza L, Rehill A. *Projections of older people with dementia and costs of dementia care in the United Kingdom, 2019-2040 (CPEC Working Paper 50)*. London: LSE, 2019. [https://www.alzheimers.org.uk/sites/default/files/2019-11/cpec\\_report\\_november\\_2019.pdf](https://www.alzheimers.org.uk/sites/default/files/2019-11/cpec_report_november_2019.pdf)
21. Dröes RM, Breebaart E, Meiland FJ, et al. Effect of Meeting Centres Support Program on feelings of competence of family carers and delay of institutionalization of people with dementia. *Aging Ment Health* 2004;8(3):201-211. doi.org/10.1080/13607860410001669732
22. Dröes RM, Meiland FJM, Schmitz M, van Tilburg W. Effect of combined support for people with dementia and carers versus regular day care on behaviour and mood of persons with dementia: results from a multicentre implementation study. *Int J Geriatr Psychiatry* 2004;19:1-12.
23. Booth A, Clarke M, Ghersi D, et al. An international registry of systematic-review protocols. *Lancet* 2011;377:108–9.
24. Morton T, Atkinson T, Brooker D, et al. Sustainability of community-based interventions for people affected by dementia: a protocol for the SCI-Dem realist review. *BMJ Open* 2019;9:e032109. doi: 10.1136/bmjopen-2019-032109
25. Pawson R. *Evidence-based Policy: A Realist Perspective*. London: Sage Publications, 2006.
26. Pawson R, Greenhalgh T, Harvey G, Walshe K. Realist review – a new method of systematic review designed for complex policy interventions. *J Health Serv Res Policy* 2005;10(1):21-24.
27. Jagosh J, Macaulay AC, Salsberg J, et al. Uncovering the benefits of participatory research: implications of a realist review for health research and practice. *Milbank Q* 2012;90:311–46.
28. Astbury B, Leeuw F. Unpacking black boxes: mechanisms and theory building in evaluation. *Am J Eval* 2010;31:363–81.
29. Pawson R, Greenhalgh T, Harvey G, et al. *Realist Synthesis – An Introduction*. ESRC Working Paper Series. London: ESRC, 2004.
30. Wong G, Greenhalgh T, Westhrop G, Pawson R. Development of methodological guidance, publication standards and training materials for realist and meta-narrative reviews: the RAMESES (Realist And Meta-narrative Evidence Syntheses - Evolving Standards) project. *Health Serv Deliv Res* 2014;2(30):1-252.
31. DEEP. *DEEP: The UK Network of Dementia Voices* website. 2020. <http://dementiavoices.org.uk>
32. Greenhalgh T, Peacock R. Effectiveness and efficiency of search methods in systematic reviews of complex evidence: audit of primary sources. *BMJ* 2005;331:1064.
33. Booth A, Harris J, Croot E, et al. Towards a methodology for cluster searching to provide conceptual and contextual “richness” for systematic reviews of complex interventions: case study (CLUSTER). *BMC Med Res Methodol* 2013;13:118.
34. Wong G. Data gathering in realist reviews: Looking for needles in haystacks. In: Emmel, N, Greenhalgh J, Manzano A, et al. (eds.) *Doing Realist Research*. London: Sage Publications, 2018:131-145.
35. Pawson R. Digging for nuggets: How ‘bad’ research can yield ‘good’ evidence. *Int J Soc Res Methodol* 2006;9(2):127-142.
36. Actifcare. *Best practice recommendations from the Actifcare study: Access to community care services for home-dwelling people with dementia and their carers*. [www.actifcare.eu](http://www.actifcare.eu). Bangor: Dementia Services Development Centre Wales, 2017. [http://dsdc.bangor.ac.uk/documents/ShortversionBestPracticeRecommendationwithoutsupportingfindings\\_000.pdf](http://dsdc.bangor.ac.uk/documents/ShortversionBestPracticeRecommendationwithoutsupportingfindings_000.pdf)
37. Alzheimer’s Australia. *The benefits of physical activity and exercise for people living with dementia (Discussion paper 11)*. Sydney: Alzheimer’s Australia, 2014. [https://www.dementia.org.au/sites/default/files/NSW/documents/AANSW\\_DiscussionPaper11.pdf](https://www.dementia.org.au/sites/default/files/NSW/documents/AANSW_DiscussionPaper11.pdf)
38. Arkin SM, Morrow-Howell N. Elder Rehab: A student-supervised exercise program for Alzheimer’s patients. *Gerontologist* 1999;39(6):729-735. doi:10.1093/geront/39.6.729
39. Arthur A, Buckner S, Buswell M, et al. *DEMCOM: National Evaluation of Dementia Friendly Communities (Executive Summary)*. Cambridge: Applied Research Collaboration (ARC) East of England, 2020.
40. Bould E, McFayden S, Thomas C. *Dementia-friendly sport and physical activity guide*. London: Alzheimer’s Society, 2019. <https://www.alzheimers.org.uk/get-involved/dementia-friendly-communities/organisations/dementia-friendly-sports>
41. Brataas HV, Bjugan H, Wille T, Hellzen O. Experiences of day care and collaboration among people with mild dementia. *J Clin Nurs* 2010;19(19-20):2839-2848. doi:10.1111/j.1365-2702.2010.03270.x
42. Brooker D, Evans SB, Evans SC, et al. *Meeting Centres Support Programme UK: Overview, evidence and getting started*. Worcester: Association for Dementia Studies, University of Worcester, 2017. <https://www.worcester.ac.uk/documents/Meeting-Centres-Support-Programme-Overview-evidence-and-getting-started-Conference-booklet.pdf>

- 1
  - 2
  - 3
  - 4
  - 5
  - 6
  - 7
  - 8
  - 9
  - 10
  - 11
  - 12
  - 13
  - 14
  - 15
  - 16
  - 17
  - 18
  - 19
  - 20
  - 21
  - 22
  - 23
  - 24
  - 25
  - 26
  - 27
  - 28
  - 29
  - 30
  - 31
  - 32
  - 33
  - 34
  - 35
  - 36
  - 37
  - 38
  - 39
  - 40
  - 41
  - 42
  - 43
  - 44
  - 45
  - 46
  - 47
  - 48
  - 49
  - 50
  - 51
  - 52
  - 53
  - 54
  - 55
  - 56
  - 57
  - 58
  - 59
  - 60
43. Cahill S, Pierce M, Bobersky A. *An evaluation report on flexible respite options of the Living Well With Dementia project in Stillorgan and Blackrock*. Dublin: Trinity College, 2014. [http://dementia.ie/images/uploads/site-images/Evaluation\\_Flexible\\_Respite\\_Options.pdf](http://dementia.ie/images/uploads/site-images/Evaluation_Flexible_Respite_Options.pdf)
44. Carone L, Tischler V, Dening T. Football and dementia: A qualitative investigation of a community based sports group for men with early onset dementia. *Dementia* 2016;15(6):1358-1376. doi:10.1177/1471301214560239
45. Casey J. Early Onset Dementia: Getting Out and About. *Journal of Dementia Care* July/August 2004;12(4):12-13.
46. Clarke CL, Keyes SE, Wilkinson H, et al. Organisational space for partnership and sustainability: Lessons from the implementation of the National Dementia Strategy for England. *Health Soc Care Community* 2014;22(6):634-645. doi:10.1111/hsc.12134
47. Daykin N, Julier G, Tomlinson A, et al. *Review of the grey literature: music, singing and wellbeing*. London: What Works Wellbeing, 2016. <https://whatworkswellbeing.files.wordpress.com/2016/11/grey-literature-review-music-singing-wellbeing-nov2016.pdf>
48. Dean J, Silversides K, Crampton J, Wrigley J. *Evaluation of the Bradford Dementia Friendly Communities Programme*. York: Josphe Rowntree Foundation, 2015. <https://www.jrf.org.uk/report/evaluation-bradford-dementia-friendly-communities-programme>
49. Dean J, Silversides K, Crampton J, Wrigley J. *Evaluation of the York Dementia Friendly Communities Programme*. York: Josphe Rowntree Foundation, 2015. <https://www.jrf.org.uk/report/evaluation-york-dementia-friendly-communities-programme>
50. Gajardo J, Aravena JM, Budinich M, et al. The Kintun program for families with dementia: From novel experiment to national policy (innovative practice). *Dementia* 2017;19(2):488-495. doi:10.1177/1471301217721863
51. Glover C. *Running self-help groups in sheltered and extra care accommodation for people who live with dementia*. London: Mental Health Foundation, 2014. <https://www.mentalhealth.org.uk/sites/default/files/dementia-self-help-guide.pdf>
52. Gottlieb-Tanaka D. *Creative expression, dementia and the therapeutic environment (PhD Thesis)*. Vancouver: University of British Columbia, 2006. <https://open.library.ubc.ca/cIRcle/collections/ubctheses/831/items/1.0076821>
53. Green G, Lakey L. *Building dementia-friendly communities: a priority for everyone*. London: Alzheimer's Society, 2013. [https://actonalz.org/sites/default/files/documents/Dementia\\_friendly\\_communities\\_full\\_report.pdf](https://actonalz.org/sites/default/files/documents/Dementia_friendly_communities_full_report.pdf)
54. Grinberg A, Lagunoff J, Phillips D, et al. Multidisciplinary design and implementation of a day program specialized for the frontotemporal dementias. *Am J Alzheimers Dis Other Demen* 2008;22(6):499-506. doi:10.1177/1533317507308780
55. Hayes R, Williamson M. *Men's Sheds: Exploring the Evidence for Best Practice*. Melbourne: La Trobe University, 2007. <https://www.researchgate.net/publication/259313489>
56. Health Innovation Network South London. *Peer Support for People with Dementia Resource Pack*. London: Health Innovation Network South London, 2015. <https://dementiapartnerships.com/resource/dementia-peer-support-resource-pack/>
57. Health Innovation Network South London. *Case Study: Dulwich Helpline and Southwark Churches Care (DH&SCC) – The Dementia Project, Southwark, South London*. London: Health Innovation Network South London, 2015. [http://www.hin-southlondon.org/system/resources/resources/000/000/083/original/Case\\_Study\\_The\\_Healthy\\_Living\\_Club.pdf?1426083299](http://www.hin-southlondon.org/system/resources/resources/000/000/083/original/Case_Study_The_Healthy_Living_Club.pdf?1426083299)
58. Health Innovation Network South London. *Case Study: The Healthy Living Club (HLC) – A self-directed, dementia-centred community group in Stockwell, London*. London: Health Innovation Network South London, 2015. [http://www.hin-southlondon.org/system/resources/resources/000/000/084/original/Case\\_Study\\_The\\_Dulwich\\_Helpline\\_and\\_Southwark\\_Churches.pdf?1426083406](http://www.hin-southlondon.org/system/resources/resources/000/000/084/original/Case_Study_The_Dulwich_Helpline_and_Southwark_Churches.pdf?1426083406)
59. Hikichi H, Kondo K, Takeda T, Kawachi I. Social interaction and cognitive decline: Results of a 7-year community intervention. *Alzheimers Dement (N Y)* 2017;3:23-32. doi:10.1016/j.trci.2016.11.003
60. Hochgraeber I, Bartholomeyczik S, Holle B. Low-threshold support for families with dementia in Germany. *BMC Res Notes* 2012;5(1). doi:10.1186/1756-0500-5-317
61. Hochgraeber I, Kutzleben MV, Bartholomeyczik S, Holle B. Low-threshold support services for people with dementia within the scope of respite care in Germany – A qualitative study on different stakeholders' perspective. *Dementia* 2015;16(5):576-590. doi:10.1177/1471301215610234
62. Jackson L. *The Debenham Project: Project Blog and Catch-Up (August 2017)*. Debenham, Suffolk: The Debenham Project, 2017. <http://www.the-debenham-project.org.uk/downloads/newsletters/blogs/1708.pdf>
63. Kelsey SG, Laditka SB. Evaluating best practices for social model programs for adults with Alzheimer's disease in South Carolina. *Home Health Care Serv Q* 2006;24(4):21-46. doi:10.1300/j027v24n04\_02



- 1
  - 2
  - 3
  - 4
  - 5
  - 6
  - 7
  - 8
  - 9
  - 10
  - 11
  - 12
  - 13
  - 14
  - 15
  - 16
  - 17
  - 18
  - 19
  - 20
  - 21
  - 22
  - 23
  - 24
  - 25
  - 26
  - 27
  - 28
  - 29
  - 30
  - 31
  - 32
  - 33
  - 34
  - 35
  - 36
  - 37
  - 38
  - 39
  - 40
  - 41
  - 42
  - 43
  - 44
  - 45
  - 46
  - 47
  - 48
  - 49
  - 50
  - 51
  - 52
  - 53
  - 54
  - 55
  - 56
  - 57
  - 58
  - 59
  - 60
64. La Rue A, Felten K, Duschene K, *et al.* Language-enriched exercise plus socialization for older adults with dementia: Translation to rural communities. *Semin Speech Lang* 2013;34(03):170-184. doi:10.1055/s-0033-1358370
65. La Rue A, Felten K, Turkstra L. Intervention of multi-modal activities for older adults with dementia translation to rural communities. *Am J Alzheimers Dis Other Demen* 2015;30(5):468-477. doi:10.1177/1533317514568888
66. LeBlanc LA. Integrating behavioral psychology services into adult day programming for individuals with dementia. *Behav Modif* 2010;34(5):443-458. doi:10.1177/0145445510383528
67. Lockwood S. *The Debenham Project: A case study of a unique community-led and owned project dedicated to the support of carers of those that have symptoms of dementia and those they care for.* Harrogate: Community Catalysts CIC, 2012. <http://www.the-debenham-project.org.uk/downloads/articles/2012/121106report.pdf>
68. Mangiaracina F, Chattat R, Farina E, *et al.* Not re-inventing the wheel: The adaptive implementation of the meeting centres support programme in four European countries. *Aging Ment Health* 2016;21(1):40-48. doi:10.1080/13607863.2016.1258540
69. Mapes N, Milton S, Nicholls V, Williamson T. *Is it nice outside? Consulting people living with dementia and their carers about engaging with the natural environment.* Natural England Commissioned Reports, Number 211. York: Natural England, 2016. <http://publications.naturalengland.org.uk/publication/5910641209507840>
70. Marshall J, Jackson L. *Encouraging and supporting the growth of "dementia proactive communities".* Ipswich: Sue Ryder/The Debenham Project, 2015. <http://www.the-debenham-project.org.uk/downloads/conference/Supplementary%20contributions/Lynden%20Jackson%20%20%20Jo%20Marshall/Lynden%20Jackson%20%20%20Jo%20Marshall%20-%20Supplementary%20Contribution.pdf>
71. Mason T, Slack G. *The Debenham Project: Research into the dementia/memory loss journey for cared-for and carer, 2012-13.* Norwich: Norfolk & Suffolk Dementia Alliance, 2013. [http://www.the-debenham-project.org.uk/downloads/articles/2014/DebProjResearch\\_Final\\_Report\\_311013.pdf](http://www.the-debenham-project.org.uk/downloads/articles/2014/DebProjResearch_Final_Report_311013.pdf)
72. McAiney CA, Hillier LM, Stolee P, *et al.* 'Throwing a lifeline': The role of First Link™ in enhancing support for individuals with dementia and their caregivers. *Neurodegener Dis Manag* 2012;2(6):623-638. doi:10.2217/nmt.12.66
73. McDonald A, Heath B. Developing services for people with dementia. *Work Older People* 2009;13(3):18-21. doi:10.1108/13663666200900045
74. The Me Myself and I Club. *The Me, Myself and I Club, Briton Ferry: A case study in warm humanity and meaningful co-production.* Neath Port Talbot: The Me Myself and I Club, 2018. <https://info.copronet.wales/me-myself-and-i-club-briton-ferry/>
75. Meiland FJ, Dröes RM, Lange J, Vernooij-Dassen M. Development Of A Theoretical Model For Tracing Facilitators And Barriers In Adaptive Implementation Of Innovative Practices In Dementia Care. *Arch Gerontol Geriatr* 2004;38:279-290. doi:10.1016/j.archger.2004.04.038
76. Meiland FJ, Dröes RM, Lange JD, Vernooij-Dassen MJ. Facilitators and barriers in the implementation of the meeting centres model for people with dementia and their carers. *Health Policy* 2005;71(2):243-253. doi:10.1016/j.healthpol.2004.08.011
77. Mental Health Foundation. *An evaluation of the Standing Together project.* London: Mental Health Foundation, 2018. <https://www.mentalhealth.org.uk/sites/default/files/standing-together-evaluation-WEB.pdf>
78. Milligan C, Payne S, Bingley A, Cockshott Z. Place and wellbeing: Shedding light on activity interventions for older men. *Ageing Soc* 2013;35(1):124-149. doi:10.1017/s0144686x13000494
79. Moore KD. Observed affect in a dementia day center: Does the physical setting matter? *Alzheimers Care Q* 2002;3(1):67-73.
80. Noimuenwai P. *Effectiveness of adult day care programs on health outcomes of Thai family caregivers of persons with dementia (PhD Thesis).* Kansas: University of Kansas, 2012. [https://kuscholarworks.ku.edu/bitstream/handle/1808/11440/Noimuenwai\\_ku\\_0099D\\_12475\\_DATA\\_1.pdf?sequence=1&isAllowed=y](https://kuscholarworks.ku.edu/bitstream/handle/1808/11440/Noimuenwai_ku_0099D_12475_DATA_1.pdf?sequence=1&isAllowed=y)
81. NCVO. *How To Fundraise In Tough Times.* London: NCVO, 2019. <https://knowhow.ncvo.org.uk/how-to/how-to-fundraise-in-tough-times>
82. Older People's Commissioner for Wales. *Rethinking respite for people affected by dementia.* Cardiff: Older People's Commissioner for Wales, 2018. <http://www.olderpeoplewales.com/en/Reviews/respite.aspx>
83. Oliver-Watkins F, Kendall N, Matthews T. *Sow & Grow: Report from a two-year Social and Therapeutic Horticultural (STH) programme delivering table-top gardening courses to adults in the community aged 50 and over.* Reading: Thrive, 2016.

- 1  
2  
3  
4  
5  
6  
7  
8  
9  
10  
11  
12  
13  
14  
15  
16  
17  
18  
19  
20  
21  
22  
23  
24  
25  
26  
27  
28  
29  
30  
31  
32  
33  
34  
35  
36  
37  
38  
39  
40  
41  
42  
43  
44  
45  
46  
47  
48  
49  
50  
51  
52  
53  
54  
55  
56  
57  
58  
59  
60
84. Reichet M, Wolter V. *Sport for People With Dementia – Implementing Physical Activity Programs (PAP) For People With Dementia: Results From A German Study (conference poster)*. Dortmund: TU Dortmund University, 2017.
  85. Reichet M, Wolter V. Implementing physical activity programs for people with dementia: Results from a German study. *Innov Aging* 2017;1(Suppl\_1):340-340. doi:10.1093/geroni/igx004.1247
  86. Rio R. A Community-Based Music Therapy Support Group for People With Alzheimer's Disease and Their Caregivers: A Sustainable Partnership Model. *Front Med* 2018;5. doi:10.3389/fmed.2018.00293
  87. Shnall A, Agate A, Grinberg A, et al. Development of supportive services for frontotemporal dementias through community engagement. *Int Rev Psychiatry* 2013;25(2):246-252. doi:10.3109/09540261.2013.767780
  88. Solutions Research. *Public perceptions and experiences of community-based end of life care initiatives: a qualitative research report*. London: Public Health England, 2016.  
[https://assets.publishing.service.gov.uk/government/uploads/system/uploads/attachment\\_data/file/569711/Public\\_Perceptions\\_of\\_Community\\_Based\\_End\\_of\\_Life\\_Care\\_Initiatives\\_Research.pdf](https://assets.publishing.service.gov.uk/government/uploads/system/uploads/attachment_data/file/569711/Public_Perceptions_of_Community_Based_End_of_Life_Care_Initiatives_Research.pdf)
  89. Strandenæs MG, Lund A, Rokstad AM. Experiences of attending day care services designed for people with dementia – a qualitative study with individual interviews. *Aging Ment Health* 2017;22(6):764-772. doi:10.1080/13607863.2017.1304892
  90. Thrive. *Growing4life - A Thrive Community Gardening Project: A practical guide to setting up a community gardening project for people affected by mental ill health*. Reading: Thrive, 2012. <https://www.lumi.org.uk/assets/resources-toolkits/event-and-projects/G4L-Resource-Book.pdf>
  91. Tuppen J. The benefits of groups that provide cognitive stimulation for people with dementia. *Nurs Older People*, 2012;24(10):20-24. doi:10.7748/nop2012.12.24.10.20.c9437
  92. Tuppen J, Burton-Jones J. Cogs Clubs: a helpful activity in early dementia. *Journal of Dementia Care* September/October 2015;23(5):20-21.
  93. Van Haefen-Van Dijk A, Meiland F, Mierlo LV, Dröes RM. Transforming nursing home-based day care for people with dementia into socially integrated community day care: Process analysis of the transition of six day care centres. *Int J Nurs Stud* 2015;52(8), 1310-1322. doi:10.1016/j.ijnurstu.2015.04.009
  94. Van Mierlo L, Chattat R, Evans S, et al. Facilitators and barriers to adaptive implementation of the Meeting Centers Support Program (MCSP) in three European countries; the process evaluation within the MEETINGDEM study. *Int Psychogeriatr* 2017;30(4):527-537. doi:10.1017/s1041610217001922
  95. Williams B, Roberts P. Friends in passing: Social interaction at an adult day care center. *Int J Aging Hum Dev* 1995;41(1):63-78. doi:10.2190/ghhw-v1qr-nacx-vbcb
  96. Wimo A, Wallin J, Lundgren K, et al. Impact of day care on dementia patients—costs, well-being and relatives' views. *Fam Pract* 1990;7(4):279-287. doi:10.1093/fampra/7.4.279
  97. Powell M, Osborne SP. Social enterprises, marketing, and sustainable public service provision. *International Review of Administrative Sciences*. 2020;86(1):62-79. doi:10.1177/0020852317751244
  98. Powell M, Gillett A, Doherty B. Sustainability in social enterprise: hybrid organizing in public services. *Public Management Review* 2019;21(2):159-186. doi:10.1080/14719037.2018.1438504
  99. Oyeboode JR, Parveen S. Psychosocial interventions for people with dementia: An overview and commentary on recent developments. *Dementia* 2019;18(1):8–35. doi: 10.1177/1471301216656096
  100. Barbarino P, Lynch C, Bliss A, et al. *From Plan to Impact III: Maintaining dementia as a priority in unprecedented times*. London: Alzheimer's Disease International, 2020. <https://www.alzint.org/u/from-plan-to-impact-2020.pdf>
  101. Canevelli M, Valletta M, Toccaceli Blasi M, et al. Facing Dementia During the COVID-19 Outbreak. *J Am Geriatr Soc* 2020;68(8):1673–1676. <https://doi.org/10.1111/jgs.16644>



| Recommendation                                                                                                                                               | CMOCs                                                                                                                                                                                                                                                                                                                                                                                                                                                                                                                                                                                                                                                                                                                                                                                                                                                                                                                                                                                                                                                                                                                                                                                                                                                                                                                                                                                                                                                                                                                                                                                                                                                                                                                                                                                                                                                                                                                                                                                                                                    |
|--------------------------------------------------------------------------------------------------------------------------------------------------------------|------------------------------------------------------------------------------------------------------------------------------------------------------------------------------------------------------------------------------------------------------------------------------------------------------------------------------------------------------------------------------------------------------------------------------------------------------------------------------------------------------------------------------------------------------------------------------------------------------------------------------------------------------------------------------------------------------------------------------------------------------------------------------------------------------------------------------------------------------------------------------------------------------------------------------------------------------------------------------------------------------------------------------------------------------------------------------------------------------------------------------------------------------------------------------------------------------------------------------------------------------------------------------------------------------------------------------------------------------------------------------------------------------------------------------------------------------------------------------------------------------------------------------------------------------------------------------------------------------------------------------------------------------------------------------------------------------------------------------------------------------------------------------------------------------------------------------------------------------------------------------------------------------------------------------------------------------------------------------------------------------------------------------------------|
| <p>Getting Members:</p> <p><b>Ensure a warm, welcoming, non-stigmatising introduction, with strong staff interpersonal skills and an appealing venue</b></p> | <p>CMOC 3: If facilitators are knowledgeable and empathetic, with good interpersonal skills (C), an initiative will be perceived as more welcoming and inclusive (O), as they will be better at understanding needs, engaging and building trust with potential members and their families (M).<sup>36 47 61 73 89 94</sup></p> <p>CMOC 4: If an initiative has an informal, unrushed and warm welcome on first visit (C), then people are more likely to want to return (O), as they are more likely to find the experience relaxing and enjoyable, not uncomfortable and intimidating (M).<sup>42 51 84 85 89</sup></p> <p>CMOC 5: If potential members have had poor previous experiences with groups or activities (dementia related or not) (C), they may not want to try another group or activity (O), because they think the experience will be similar and will want to avoid it (M).<sup>47 74 82 94</sup></p> <p>CMOC 6: If time is taken for personal contact, home visits or taster sessions with potential members (C), then people are more likely to come (O), as they will feel more familiar with the initiative and more trusting of those running it (M).<sup>36 40 53 61 70 82</sup></p> <p>CMOC 7: If an initiative is familiar and trusted, or local and well integrated with other organisations in the community (C), then people are more likely to come (O), as its links to familiar things that they trust will make it less intimidating (M).<sup>40 42 46 47 57 65 71 75 88 94</sup></p> <p>CMOC 8: If an intervention is based in familiar surroundings in, and open to, the community (C), then people are more likely to come (O), because potential members will find the normalcy, lack of stigma and chance for social integration appealing (M).<sup>40 43 44 50 54 57 61 76 86 94</sup></p> <p>CMOC 9: If a venue is dementia-friendly, comfortable and accessible (C), people are more likely to come (O), as they will not have concerns about comfort or access (M).<sup>40 52 69 75</sup></p> |
| <p>Keeping Members:</p> <p><b>Keep activities relaxed, loose and focussed on the social, and encourage friendships and peer support</b></p>                  | <p>CMOC 47: If there is group cohesion and mutual trust between members (C), then a group is more likely to sustain (O), because members will feel more solidarity and investment in the group (M).<sup>41</sup></p> <p>CMOC 48: If friendships between members are encouraged, recognised and supported by staff and activities (C), then people are likely to keep coming (O), as they will feel more supported, comfortable and engaged, and able to support each other (M).<sup>45 51 71 83 95</sup></p> <p>CMOC 49: If an intervention is too focussed on agendas, rules and expectations (C), then people may stop coming (O), because they feel pressured, restricted and unable to relax and enjoy the social and emotional benefits important to them (M).<sup>37 52 55 78 83 84 85</sup></p> <p>CMOC 50: If the pace of activity through the day/session is too fast and strict (C), then people may stop coming (O), because they will struggle to stay engaged and will not enjoy themselves (M).<sup>40 43 51 76 91</sup></p> <p>CMOC 51: If ample informal time is made for socialising, peer support and feedback (C), then members are more likely to keep coming (O), as they will be more likely to feel comfortable and supported (M).<sup>37 40 41 44 51 55 70 77 78 83 86 89 90 91 92</sup></p> <p>CMOC 52: If there is opportunity to have communal eating and relaxing in a "cozy" environment (C), then members are more likely to keep coming (O), as this will provide comfort and foster group cohesion (M).<sup>41 89</sup></p>                                                                                                                                                                                                                                                                                                                                                                                                                                                                              |

**Table 1** Examples of CMOCs leading to recommendations

|                                                                                                                                                                                                                                                                                                                                                                                                                                                                                                                                                                                                                                                                                                                                                                                                                                                                                                                                                                                                                                                                                                                                                                                                                                                                                                                                                                                                                                                                                                                                                                                                                                                                                                                                                                                                                                                                                                                                                                                                                                                                                                                                                                                                                             |                                                                                                                                                                                                                                                                                                                                                                                                                                                                                                                                                                                                                                                                                                                                                                                                                                                                                                                                                                                                                                                                                                                                                                                                                                                                                                                                                                                                                                                                                                                                                                                                                     |
|-----------------------------------------------------------------------------------------------------------------------------------------------------------------------------------------------------------------------------------------------------------------------------------------------------------------------------------------------------------------------------------------------------------------------------------------------------------------------------------------------------------------------------------------------------------------------------------------------------------------------------------------------------------------------------------------------------------------------------------------------------------------------------------------------------------------------------------------------------------------------------------------------------------------------------------------------------------------------------------------------------------------------------------------------------------------------------------------------------------------------------------------------------------------------------------------------------------------------------------------------------------------------------------------------------------------------------------------------------------------------------------------------------------------------------------------------------------------------------------------------------------------------------------------------------------------------------------------------------------------------------------------------------------------------------------------------------------------------------------------------------------------------------------------------------------------------------------------------------------------------------------------------------------------------------------------------------------------------------------------------------------------------------------------------------------------------------------------------------------------------------------------------------------------------------------------------------------------------------|---------------------------------------------------------------------------------------------------------------------------------------------------------------------------------------------------------------------------------------------------------------------------------------------------------------------------------------------------------------------------------------------------------------------------------------------------------------------------------------------------------------------------------------------------------------------------------------------------------------------------------------------------------------------------------------------------------------------------------------------------------------------------------------------------------------------------------------------------------------------------------------------------------------------------------------------------------------------------------------------------------------------------------------------------------------------------------------------------------------------------------------------------------------------------------------------------------------------------------------------------------------------------------------------------------------------------------------------------------------------------------------------------------------------------------------------------------------------------------------------------------------------------------------------------------------------------------------------------------------------|
| <p><b>Getting Members</b></p>                                                                                                                                                                                                                                                                                                                                                                                                                                                                                                                                                                                                                                                                                                                                                                                                                                                                                                                                                                                                                                                                                                                                                                                                                                                                                                                                                                                                                                                                                                                                                                                                                                                                                                                                                                                                                                                                                                                                                                                                                                                                                                                                                                                               | <p><b>Keeping Members</b></p>                                                                                                                                                                                                                                                                                                                                                                                                                                                                                                                                                                                                                                                                                                                                                                                                                                                                                                                                                                                                                                                                                                                                                                                                                                                                                                                                                                                                                                                                                                                                                                                       |
| <p><b>Emphasise the social aspects of your intervention, including food and refreshments, for wide appeal</b><br/>                 CMOC 1 – CMOC 2 <sup>26 27 36 38 41 46 56 57 59</sup></p> <p><b>Ensure a warm, welcoming, non-stigmatising introduction, with strong staff interpersonal skills and an appealing venue</b><br/>                 CMOC 3 – CMOC 9 <sup>36 40 42 43 44 46 47 50 51 52 53 54 57 61 65 69 70 71 73 74 75 76 82 84 85 86 88 89 94</sup></p> <p><b>Foster understanding and support from trusted friends, family and health professionals, as their encouragement can be key</b><br/>                 CMOC 10 – CMOC 14 <sup>36 40 41 42 44 48 49 61 71 77 80 82 86 88 92 93 94</sup></p> <p><b>Provide meaningful activities that have resonance with people’s interests and experience, personal history and culture</b><br/>                 CMOC 15 – CMOC 20 <sup>37 40 41 43 44 49 52 55 56 59 60 64 65 67 69 70 74 78 82 83 84 85 86 88 91 94</sup></p> <p><b>Be sensitive to differences in abilities, ages and stages and aim to empower members rather than avoid challenges for them</b><br/>                 CMOC 21 – CMOC 24 <sup>37 40 44 47 51 52 54 69 77 86 93</sup></p> <p><b>Offer information and advice to connect with a broad range of people who may be in need</b><br/>                 CMOC 25 <sup>42 58 71 77 84 85</sup></p> <p><b>Ensure people can get there easily, safely, reliably and cheaply</b><br/>                 CMOC 26 – CMOC 30 <sup>36 40 41 47 48 49 50 53 54 58 60 61 68 69 76 77 80 82 84 85 88</sup></p> <p><b>Stay in constant contact with potential referrers and keep them involved</b><br/>                 CMOC 31 – CMOC 32 <sup>46 71 74 75 76 90 92 93 94</sup></p> <p><b>Your "public relations" strategy should focus on who the intervention is for and what people can expect, and use existing networks to spread your message</b><br/>                 CMOC 33 – CMOC 41 <sup>36 40 45 46 47 50 53 55 56 60 61 62 64 67 71 72 74 76 77 79 80 82 83 84 85 86 88 90 91 92 94</sup></p> <p><b>Consider simple and easy self referral</b><br/>                 CMOC43 – CMOC 46 <sup>43 48 56 72 76 61 64 82 84 85 90 93</sup></p> | <p><b>Keep activities relaxed, loose and focussed on the social, and encourage friendships and peer support</b><br/>                 CMOC 47 – CMOC 52 <sup>37 40 41 43 44 45 51 52 55 70 71 76 77 78 83 84 85 86 89 90 91 92 95</sup></p> <p><b>Encourage normalised activities and social integration outside of the group to empower members and reduce stigma</b><br/>                 CMOC 53 – CMOC 57 <sup>39 40 43 44 45 47 48 50 53 57 61 71 74 76 78 82 83 86 94</sup></p> <p><b>Be person-centred: Give members input into planning and decision-making, and respect their individual needs and autonomy</b><br/>                 CMOC 58 – CMOC 63 <sup>36 40 41 42 45 50 51 52 57 63 67 74 75 76 78 83 84 85 89 90 94</sup></p> <p><b>Talk to family or care partners about what arrangements and support they need in place</b><br/>                 CMOC 64 – CMOC 65 <sup>40 43 53 54 61 70 71 76 77 80 82 84 85</sup></p> <p><b>Be sensitive to differences in abilities, ages and stages and have strategies to differentiate and manage activities so needs don’t clash</b><br/>                 CMOC 66 – CMOC 70 <sup>40 43 44 45 47 48 50 51 53 54 74 76 78 80 82 83 84 85 90 92 94</sup></p> <p><b>Ensure your venue is comfortable, stable and familiar, with adequate facilities and multiple spaces for use</b><br/>                 CMOC 71 – CMOC 72 <sup>40 51 52 75 79</sup></p> <p><b>Stability and reliability matters to members, so aim for structure and minimise disruption</b><br/>                 CMOC 73 – CMOC 77 <sup>36 40 41 45 47 51 61 76 77 82 83 89 91 92</sup></p> |
| <p><b>Getting Staff and Volunteers</b></p>                                                                                                                                                                                                                                                                                                                                                                                                                                                                                                                                                                                                                                                                                                                                                                                                                                                                                                                                                                                                                                                                                                                                                                                                                                                                                                                                                                                                                                                                                                                                                                                                                                                                                                                                                                                                                                                                                                                                                                                                                                                                                                                                                                                  | <p><b>Keeping Staff and Volunteers</b></p>                                                                                                                                                                                                                                                                                                                                                                                                                                                                                                                                                                                                                                                                                                                                                                                                                                                                                                                                                                                                                                                                                                                                                                                                                                                                                                                                                                                                                                                                                                                                                                          |
| <p><b>Network proactively: Engage in outreach activities to boost visibility and awareness; approach other groups and organisations for help</b><br/>                 CMOC 78 – CMOC 83 <sup>37 40 44 49 50 56 63 64 67 70 74 79 83 88</sup></p> <p><b>Get to know potential stakeholder groups in the local population that may provide a reliable volunteer base, and consider how to reach out to them</b><br/>                 CMOC 84 – CMOC 90 <sup>38 41 59 63 64 65 66 86 88</sup></p> <p><b>Not all personnel need expertise, but ensure facilitators have good interpersonal and leadership skills, and your volunteer workforce is reliable</b><br/>                 CMOC 91 – CMOC 95 <sup>44 46 61 70 76 77 78 91 92 93</sup></p>                                                                                                                                                                                                                                                                                                                                                                                                                                                                                                                                                                                                                                                                                                                                                                                                                                                                                                                                                                                                                                                                                                                                                                                                                                                                                                                                                                                                                                                                              | <p><b>Foster flexibility, collaboration and communication skills in personnel to create a healthy and effective working environment</b><br/>                 CMOC 96 – CMOC 97 <sup>48 50 54 66 93</sup></p> <p><b>Plan strategies to maintain the satisfaction and enjoyment of staff and volunteers, and to avoid burnout</b><br/>                 CMOC 98 – CMOC 104 <sup>44 51 55 57 61 67 76 90 92</sup></p> <p><b>If possible, have financial support in place for staff roles and volunteers activities, so they will feel secure and valued</b><br/>                 CMOC 105 – CMOC 108 <sup>46 62 67 77 83 93</sup></p>                                                                                                                                                                                                                                                                                                                                                                                                                                                                                                                                                                                                                                                                                                                                                                                                                                                                                                                                                                                   |
| <p><b>Getting Support of Other Organisations</b></p>                                                                                                                                                                                                                                                                                                                                                                                                                                                                                                                                                                                                                                                                                                                                                                                                                                                                                                                                                                                                                                                                                                                                                                                                                                                                                                                                                                                                                                                                                                                                                                                                                                                                                                                                                                                                                                                                                                                                                                                                                                                                                                                                                                        | <p><b>Keeping Support of Other Organisations</b></p>                                                                                                                                                                                                                                                                                                                                                                                                                                                                                                                                                                                                                                                                                                                                                                                                                                                                                                                                                                                                                                                                                                                                                                                                                                                                                                                                                                                                                                                                                                                                                                |
| <p><b>Focus on raising awareness and communicating value both to professionals and the community, involving them where possible</b><br/>                 CMOC 110 – CMOC 114 <sup>39 42 47 55 56 67 68 70 71 73 75 76 92 93 94</sup></p>                                                                                                                                                                                                                                                                                                                                                                                                                                                                                                                                                                                                                                                                                                                                                                                                                                                                                                                                                                                                                                                                                                                                                                                                                                                                                                                                                                                                                                                                                                                                                                                                                                                                                                                                                                                                                                                                                                                                                                                    | <p><b>Maintain constant contact and information sharing with the organisations, services and referrers you work with, with a dedicated person responsible if possible</b></p>                                                                                                                                                                                                                                                                                                                                                                                                                                                                                                                                                                                                                                                                                                                                                                                                                                                                                                                                                                                                                                                                                                                                                                                                                                                                                                                                                                                                                                       |

|                                                                                                                                                                                                                                                                                                                                                                                                                                                                                                                                                                                                                                                                                                                                                                                                                                                                                                                                                                                                                                                                                    |                                                                                                                                                                                                                                                                                                                                                                                                                                                                                                                                                                                                                                                                                                                                                                                                                                                                                                                                                                   |
|------------------------------------------------------------------------------------------------------------------------------------------------------------------------------------------------------------------------------------------------------------------------------------------------------------------------------------------------------------------------------------------------------------------------------------------------------------------------------------------------------------------------------------------------------------------------------------------------------------------------------------------------------------------------------------------------------------------------------------------------------------------------------------------------------------------------------------------------------------------------------------------------------------------------------------------------------------------------------------------------------------------------------------------------------------------------------------|-------------------------------------------------------------------------------------------------------------------------------------------------------------------------------------------------------------------------------------------------------------------------------------------------------------------------------------------------------------------------------------------------------------------------------------------------------------------------------------------------------------------------------------------------------------------------------------------------------------------------------------------------------------------------------------------------------------------------------------------------------------------------------------------------------------------------------------------------------------------------------------------------------------------------------------------------------------------|
| <p><b>Approach and ask other community organisations if they can help with venue, resources, training, volunteers or contacts</b></p> <p>CMOC 115 – CMOC 118 <sup>37 38 40 41 44 49 56 57 66 74 78 83 86 91 92</sup></p> <p><b>Use your physical location (venue or neighbourhood) as an opportunity to build links with others sharing that space</b></p> <p>CMOC 119 – CMOC 121 <sup>40 42 44 50 86 93 94</sup></p> <p><b>Seek out like-minded groups to band together with and share knowledge, resources, contacts and strategy</b></p> <p>CMOC 122 – CMOC 124 <sup>42 49 83</sup></p> <p><b>To avoid conflict with other organisations, minimise overlap, involve them or offer them something of benefit</b></p> <p>CMOC 125 – CMOC 131 <sup>42 46 54 55 67 68 72 74 76 83 91 93 94</sup></p>                                                                                                                                                                                                                                                                                | <p>CMOC 138 – CMOC 142 <sup>46 49 67 70 73 75 83 84 85 93 94</sup></p> <p><b>Seek authoritative external advice on overcoming differences in culture with other organisations, and up-skilling staff for collaboration</b></p> <p>CMOC 143 – CMOC 148 <sup>46 48 49 50 54 55 68 93 94</sup></p> <p><b>Take time to formally plan how collaboration will work, involving collaborators in that planning</b></p> <p>CMOC 149 – CMOC 152 <sup>46 55 76 84 85 94</sup></p>                                                                                                                                                                                                                                                                                                                                                                                                                                                                                            |
| <p><b>Getting Funding and Income</b></p>                                                                                                                                                                                                                                                                                                                                                                                                                                                                                                                                                                                                                                                                                                                                                                                                                                                                                                                                                                                                                                           | <p><b>Keeping Funding and Income</b></p>                                                                                                                                                                                                                                                                                                                                                                                                                                                                                                                                                                                                                                                                                                                                                                                                                                                                                                                          |
| <p><b>Ensure communication is clear about what the intervention does and its value</b></p> <p>CMOC 153 – CMOC 163 <sup>46 55 56 73 74 76 79 81 88 92 93 94</sup></p> <p><b>Build “social capital” and forge partnerships with other community organisations to help with costs and boost the case for viability and value for money</b></p> <p>CMOC 164 – CMOC 169 <sup>48 54 55 56 62 66 76 80 81 88 92 93 96</sup></p> <p><b>Learn how to effectively plan and network to find funding, through knowledge-sharing with like-minded groups and seeking external advice</b></p> <p>CMOC 170 – CMOC 175 <sup>47 54 56 63 68 74 75 76 81</sup></p> <p><b>Initiatives in rural areas should make clear the particular challenges that they face when seeking funding</b></p> <p>CMOC 176 – CMOC 179 <sup>63 67 70</sup></p> <p><b>Find out what the national priorities are for dementia, and see if you can tailor your activities to fit; if not, lobby to change the national agenda</b></p> <p>CMOC 180 – CMOC 184 <sup>42 46 48 49 50 56 62 63 67 68 70 73 75 87 94 96</sup></p> | <p><b>Keep in touch with previous, current and potential funders on an ongoing basis, as this will help when applying in the future</b></p> <p>CMOC 185 – CMOC 188 <sup>55 74 75 76 81</sup></p> <p><b>Pay attention to how money can be put to use most efficiently and effectively for the benefit of all by co-operating and sharing with other organisations</b></p> <p>CMOC 189 – CMOC 190 <sup>48 55 56 66 80 92</sup></p> <p><b>Plan a long-term strategy to build a portfolio of multiple income streams, that are flexible in what they contribute to paying for</b></p> <p>CMOC 191 – CMOC 194 <sup>55 56 67 81 84 85</sup></p> <p><b>Ensure someone has the time and expertise to continually seek and apply for funding</b></p> <p>CMOC 195 – CMOC 197 <sup>55 67 56</sup></p> <p><b>Emphasise deep learning and experience as an asset when calling for longer term funding</b></p> <p>CMOC 198 – CMOC 201 <sup>46 48 49 62 68 70 73 87 93</sup></p> |

**Table 2** Recommendations for practice (For a full list of CMOCs see Supplementary file 5)

|                                                                                                                                                                                                                                                                                                                                                                                                                                                                                                                                                                                                                                                                                                                                                                                                                                                                                                                                                                                                                                                                                                                                                                                                                                                                                                                                                                                                    |
|----------------------------------------------------------------------------------------------------------------------------------------------------------------------------------------------------------------------------------------------------------------------------------------------------------------------------------------------------------------------------------------------------------------------------------------------------------------------------------------------------------------------------------------------------------------------------------------------------------------------------------------------------------------------------------------------------------------------------------------------------------------------------------------------------------------------------------------------------------------------------------------------------------------------------------------------------------------------------------------------------------------------------------------------------------------------------------------------------------------------------------------------------------------------------------------------------------------------------------------------------------------------------------------------------------------------------------------------------------------------------------------------------|
| <p><b>Recommendations for commissioning/policy-making</b></p>                                                                                                                                                                                                                                                                                                                                                                                                                                                                                                                                                                                                                                                                                                                                                                                                                                                                                                                                                                                                                                                                                                                                                                                                                                                                                                                                      |
| <p><b>Service users value the social side of an intervention highly, often more than the intervention or activity itself</b></p> <p>CMOC 1 – CMOC 2; CMOC 47 – CMOC 53 <sup>26 27 36 37 38 40 41 43 44 45 46 50 51 52 53 55 56 57 59 61 70 71 76 77 78 82 83 84 85 86 89 90 91 92 94 95</sup></p> <p><b>Service users need to feel an intervention is “for them” to want to attend and keep attending</b></p> <p>CMOC 15 – CMOC 24; CMOC 66 – CMOC 70 <sup>37 40 41 43 44 45 47 48 49 50 51 52 53 54 55 56 59 60 64 65 67 69 70 74 76 77 78 80 82 83 84 85 86 88 90 91 92 93 94</sup></p> <p><b>Lack of appropriate transport can be a major barrier to an intervention getting and keeping attendees</b></p> <p>CMOC 26 – CMOC 30; CMOC 65 <sup>36 40 41 43 47 48 49 50 53 54 58 60 61 68 69 70 76 77 80 82 84 85 88</sup></p> <p><b>Health and social care services that may refer to an intervention need incentive and guidance to do so</b></p> <p>CMOC 42 – CMOC 44; CMOC 134 – CMOC 135 <sup>37 48 49 56 70 72 76 82 93</sup></p> <p><b>To retain staff and volunteers there needs to be adequate financial support in place for roles and activities</b></p> <p>CMOC 105 – CMOC 109 <sup>46 62 67 70 77 83 93</sup></p> <p><b>Established community organisations, including local authorities, can offer help in a number of ways to enable small-scale interventions to flourish</b></p> |

CMOC 115 – CMOC 118 <sup>37 38 40 41 44 49 56 57 66 74 78 83 86 91 92</sup>

**Access to advice on how to create partnerships, collaborate and overcome differences in culture with other organisations can help**

CMOC 143 – CMOC 148 <sup>46 48 49 50 54 55 68 93 94</sup>

**Access to advice on how to effectively plan and network to help find and manage funding and income can help**

CMOC 170 – CMOC 175 <sup>47 54 56 63 68 74 75 76 81</sup>

**Commissioners should be flexible and accommodating of the challenges facing small groups regarding evidence gathering**

CMOC 176 – CMOC 179 <sup>63 67 70</sup>

**Policy makers should ensure policy meets local needs with adequate, protected and accessible resources attached**

CMOC 180 – CMOC 182; CMOC 184 <sup>42 46 48 49 50 56 62 63 67 68 70 73 75 94 96</sup>

**Longer term funding, with simplified application processes, would help smaller initiatives with less capacity to continue**

CMOC 195 – CMOC 197 <sup>55 67 56</sup>

**Longer term funding to support what is already being done will help retain and develop learning and practice on how best to meet local need**

CMOC 198 – CMOC 200 <sup>46 48 49 62 68 70 73 93</sup>

**Authorities and national organisations can help create conditions that encourage support for small initiatives, though policy, leadership and commissioning**

CMOC 132 – CMOC 137 <sup>37 46 49 50 70 73 82</sup>

**Table 3** Recommendations for commissioning/policy-making (For a full list of CMOCs see Supplementary file 5)

1  
2  
3  
4  
5  
6  
7  
8  
9  
10  
11  
12  
13  
14  
15  
16  
17  
18  
19  
20  
21  
22  
23  
24  
25  
26  
27  
28  
29  
30  
31  
32  
33  
34  
35  
36  
37  
38  
39  
40  
41  
42  
43  
44  
45  
46  
47  
48  
49  
50  
51  
52  
53  
54  
55  
56  
57  
58  
59  
60

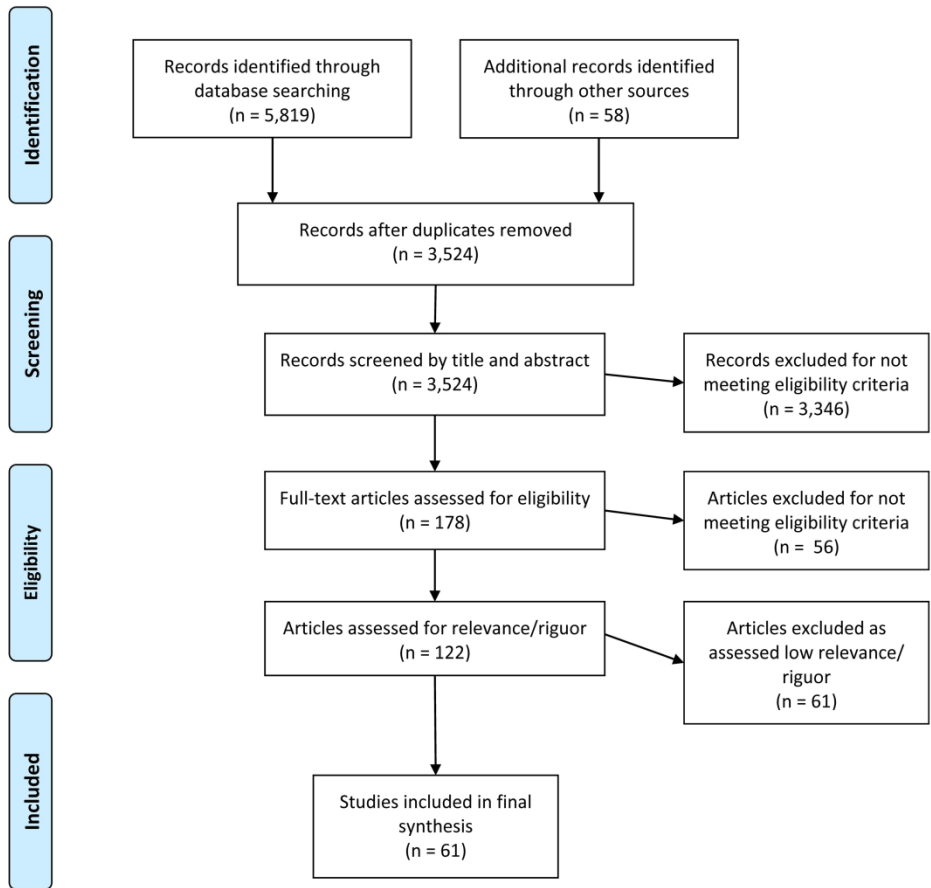

Figure 1 PRISMA flow diagram

133x130mm (600 x 600 DPI)

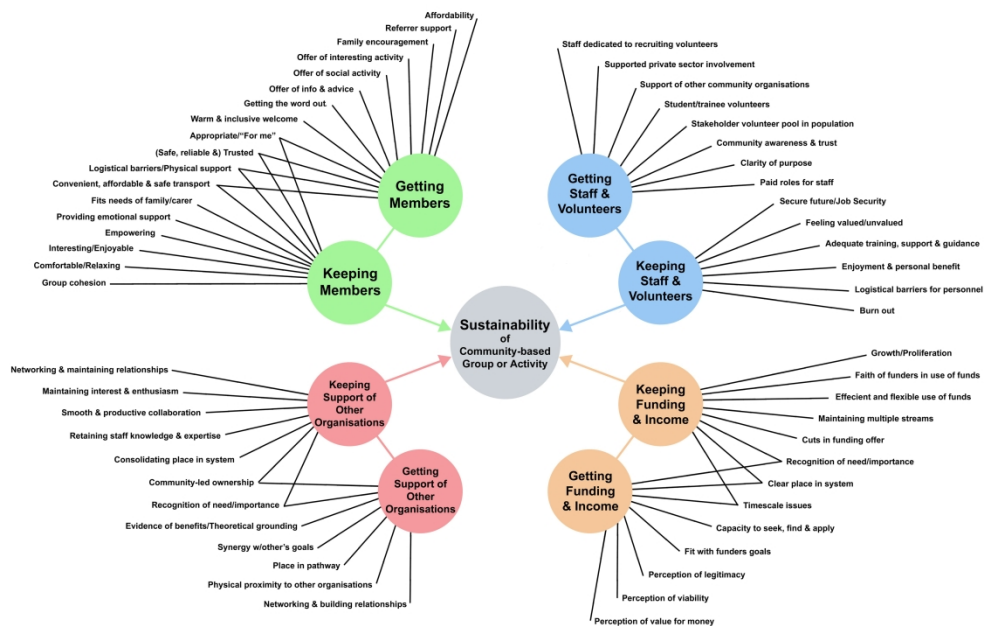

Figure 2 Factors affecting the sustainability of community-based groups and activities

164x106mm (600 x 600 DPI)

## Supplementary file 1: Search strategy

### Databases:

EBSCOhost: **Academic Search Complete, CINAHL, MEDLINE, PsychINFO**

Other health and social care databases: **AMED, Embase, PubMed, Social Care Online**

Interdisciplinary databases: **ProQuest, Scopus**

Systematic reviews: **Cochrane Library, Campbell Collaboration**

Other/general: **Google Scholar**

**Limiters:** Published 1990 to present

| Key terms                            | String of related terms                                                                                                              |
|--------------------------------------|--------------------------------------------------------------------------------------------------------------------------------------|
| <b>Dementia</b>                      | Dementia                                                                                                                             |
| <b>Community</b>                     | Commun* OR Local* OR Social*                                                                                                         |
| <b>Intervention</b>                  | Intervention OR Program* OR Project OR Initiative OR Scheme OR Service OR Activit* OR Group OR Club OR Network OR Meeting OR Therapy |
| <b>Sustainability</b>                | Sustain* OR Maint* OR Manag* OR Facilitat* OR Barrier*                                                                               |
| <b>Implementation and Engagement</b> | Implement* OR Recruit* OR Engag*                                                                                                     |

Dementia AND (Commun\* OR Local\* OR Social\*) AND (Intervention OR Program\* OR Project OR Initiative OR Scheme OR Service OR Activit\* OR Group OR Club OR Network OR Meeting OR Therapy) AND (Sustain\* OR Maint\* OR Manag\* OR Facilitat\* OR Barrier\*) AND (Implement\* OR Recruit\* OR Engag\*)

## Supplementary file 2: Inclusion and assessment criteria

### Inclusion and exclusion criteria for formal search:

| <b>Inclusion criteria</b><br>Types of intervention for inclusion should:                                                                                                                                                                                                                                                                                                                                                                                                                                                                                                                                                                                                                                                                                                                                                                                                                                                                                                                                                   | <b>Exclusion criteria</b><br>Interventions will be excluded if they:                                                                                                                                                                                                                                                                                                                                                                                                                                                                                                                                                                                                                                                                                                                                                                                                                                                                                                                                                                                       |
|----------------------------------------------------------------------------------------------------------------------------------------------------------------------------------------------------------------------------------------------------------------------------------------------------------------------------------------------------------------------------------------------------------------------------------------------------------------------------------------------------------------------------------------------------------------------------------------------------------------------------------------------------------------------------------------------------------------------------------------------------------------------------------------------------------------------------------------------------------------------------------------------------------------------------------------------------------------------------------------------------------------------------|------------------------------------------------------------------------------------------------------------------------------------------------------------------------------------------------------------------------------------------------------------------------------------------------------------------------------------------------------------------------------------------------------------------------------------------------------------------------------------------------------------------------------------------------------------------------------------------------------------------------------------------------------------------------------------------------------------------------------------------------------------------------------------------------------------------------------------------------------------------------------------------------------------------------------------------------------------------------------------------------------------------------------------------------------------|
| <ul style="list-style-type: none"> <li>• Target people with mild to moderate dementia (whether exclusively or among others without dementia, but either way there is dementia-specific support)</li> <li>• Serve people living in the community, whether in their own homes or in extra-care housing</li> <li>• Are voluntary attendance (i.e. members have chosen to attend, not been told they must as part of treatment or respite care)</li> <li>• Are social and place-based (bringing people together physically) in a community setting (open to members of the public to attend)</li> <li>• Are designed as an intervention with meaningful activity aiming to improve quality of life for people with dementia and family carers, or to help them manage or lessen the challenging effects dementia</li> <li>• Meet at regular, pre-fixed times, at least weekly and for a substantial amount of time (i.e. a morning or afternoon)</li> <li>• Meet continuously, on an ongoing basis, or aim to do so</li> </ul> | <ul style="list-style-type: none"> <li>• Are only for those with severe dementia</li> <li>• Do not target, and have no plan to cater for, people with dementia</li> <li>• Are only for care home residents, hospital patients or those in a closed institutional setting</li> <li>• Are an online or at-a-distance networking scheme that does not involve meeting physically</li> <li>• Only involve individual participants alone (e.g. occupational therapy, counselling or medical)</li> <li>• Are only functional meetings solely for the purpose of administering medical treatment or carry out case management</li> <li>• Are focussed mainly upon respite for carers or nursing care only (i.e. not focussed upon social, meaningful and quality-of-life-raising activities for those attending)</li> <li>• Only take place monthly; or for a very short duration (e.g. one hour); or intermittently with no specified or timetabled meetings</li> <li>• Are fixed-term courses with a time/goal/session limit (e.g. an 8 week course)</li> </ul> |

### Relevance and rigour assessment guidance:

| <b>Relevance</b>                                                                                                                                                                                                                                       | <b>Rigour</b>                                                                                                                                                                                                                                                                                                                                                                                                                                                                                            |
|--------------------------------------------------------------------------------------------------------------------------------------------------------------------------------------------------------------------------------------------------------|----------------------------------------------------------------------------------------------------------------------------------------------------------------------------------------------------------------------------------------------------------------------------------------------------------------------------------------------------------------------------------------------------------------------------------------------------------------------------------------------------------|
| <p>An article should comply with the inclusion/exclusion criteria in the first instance, except where agreed by the team for inclusion for a specific reason e.g. containing data that is broadly transferable and of use to the programme theory.</p> | <p>This is an assessment of the likely validity and reliability only of the <i>relevant</i> data contained in an article, <i>not</i> an assessment of the rigour of a study or intervention programme as a whole. Useful questions might include: <i>Is this data likely to be biased? Is it dealt with critically? Is it from a real-world example or theoretical speculation? Was the data gathered in some depth over time or in a quick "snapshot"? Is it safe to generalise from this data?</i></p> |



| Reasons for rating must be recorded. For example:                                                                                                                                                                                                                                                                                                                                                                                                                                                                                                 | Reasons for rating must be recorded. For example:                                                                                                                                                                                                                                                                                                                                                                                                                                                                                                                                                                                                                                                                                                      |
|---------------------------------------------------------------------------------------------------------------------------------------------------------------------------------------------------------------------------------------------------------------------------------------------------------------------------------------------------------------------------------------------------------------------------------------------------------------------------------------------------------------------------------------------------|--------------------------------------------------------------------------------------------------------------------------------------------------------------------------------------------------------------------------------------------------------------------------------------------------------------------------------------------------------------------------------------------------------------------------------------------------------------------------------------------------------------------------------------------------------------------------------------------------------------------------------------------------------------------------------------------------------------------------------------------------------|
| <p>A <b>low rating</b> might mean the article that only contains a few relevant lines, with the bulk of the text focused on other, non-relevant matters</p> <p>A <b>medium rating</b> might mean an article has a lot of detail on one relevant issue (e.g. engaging people and keeping them engaged) which is pertinent to sustainability, but otherwise little on other important factors</p> <p>A <b>high rating</b> will mean an article has a direct focus on keeping an intervention sustainable long term, with a good level of detail</p> | <p>A <b>low rating</b> might mean data appears uncritically treated and at a high risk of bias (e.g. from a promotional article for a service) or simply descriptive and superficial in its reporting of basic facts from an intervention programme (e.g. from a short news article)</p> <p>A <b>medium rating</b> might mean data appears with some attempt at critical evaluation and is from a real-world example, but is limited in scope and generalisability, or in depth and detail</p> <p>A <b>high rating</b> might mean data is of good depth and detail and is from a critical evaluation of at least one real world example, gathered over a sustained period using range of robust measures and an appropriate sample of participants</p> |

## Supplementary file 3: Full lists of included articles

| Author(s)                                                                                                | Year | Article title                                                                                                                                     | Type of intervention                                                                                            | Country of origin                                                  | Type of article/study           | Publication                                          | Reference list No. |
|----------------------------------------------------------------------------------------------------------|------|---------------------------------------------------------------------------------------------------------------------------------------------------|-----------------------------------------------------------------------------------------------------------------|--------------------------------------------------------------------|---------------------------------|------------------------------------------------------|--------------------|
| Actifcare                                                                                                | 2017 | Best practice recommendations from the Actifcare study: Access to community care services for home-dwelling people with dementia and their carers | <b>community care services</b> in general                                                                       | Netherlands, Germany, Sweden, UK, Norway, Ireland, Portugal, Italy | Recommendations report          | www.actifcare.eu                                     | <b>36</b>          |
| Alzheimer's Australia                                                                                    | 2014 | The benefits of physical activity and exercise for people living with dementia (Discussion paper 11)                                              | <b>Exercise activities</b>                                                                                      | Australia                                                          | Report                          | Alzheimer's Australia                                | <b>37</b>          |
| Arkin                                                                                                    | 1999 | Elder rehab: A student-supervised exercise program for Alzheimer's patients                                                                       | <b>Weekly exercise programme</b> pairing elders and student helpers at a college gym (caregivers also involved) | US                                                                 | Journal paper - programme pilot | The Gerontologist                                    | <b>38</b>          |
| Arthur, Buckner, Buswell, Darlington, Killett, Lafortune, Mathie, Mayrhofer, Skedgel, Woodward & Goodman | 2020 | DEMCOM: National Evaluation of Dementia Friendly Communities (Executive Summary)                                                                  | <b>Dementia Friendly Communities - various social and leisure activities</b>                                    | UK                                                                 | Evaluation report               | Applied Research Collaboration (ARC) East of England | <b>39</b>          |

1  
2  
3  
4  
5  
6  
7  
8  
9  
10  
11  
12  
13  
14  
15  
16  
17  
18  
19  
20  
21  
22  
23  
24  
25  
26  
27  
28  
29  
30  
31  
32  
33  
34  
35  
36  
37  
38  
39  
40  
41  
42  
43  
44  
45  
46

|                                      |      |                                                                                                                       |                                       |                                |                                                 |                                                            |           |
|--------------------------------------|------|-----------------------------------------------------------------------------------------------------------------------|---------------------------------------|--------------------------------|-------------------------------------------------|------------------------------------------------------------|-----------|
| Bould, McFadyen & Thomas             | 2019 | Dementia-friendly sport and physical activity guide                                                                   | <b>Sport and exercise initiatives</b> | UK                             | Information booklet                             | Alzheimer's Society                                        | <b>40</b> |
| Brataas, Bjugan, Wille & Hellzen     | 2010 | Experiences of day care and collaboration among people with mild dementia                                             | <b>Day care</b>                       | Norway                         | Journal paper - qual study of a trial programme | Journal of Clinical Nursing                                | <b>41</b> |
| Brooker, Evans, Evans, Watts & Drees | 2017 | Meeting Centres Support Programme UK: Overview, evidence and getting started                                          | <b>Meeting Centres</b>                | Netherlands, Italy, Poland, UK | Information/guide booklet                       | Association for Dementia Studies (University of Worcester) | <b>42</b> |
| Cahill, Pierce & Bobersky            | 2014 | An evaluation report on flexible respite options of the Living Well With Dementia project in Stillorgan and Blackrock | <b>Day care/respite</b>               | Ireland                        | Evaluation report                               | Trinity College Dublin                                     | <b>43</b> |

|                                                                                                                            |                                                                                                                     |      |                                                                                                                                        |                                           |    |                                     |                                       |           |
|----------------------------------------------------------------------------------------------------------------------------|---------------------------------------------------------------------------------------------------------------------|------|----------------------------------------------------------------------------------------------------------------------------------------|-------------------------------------------|----|-------------------------------------|---------------------------------------|-----------|
| 1<br>2<br>3<br>4<br>5<br>6<br>7<br>8<br>9                                                                                  | Carone, Tischler & Dening                                                                                           | 2016 | Football and dementia: A qualitative investigation of a community based sports group for men with early onset dementia                 | <b>Sport and exercise group</b>           | UK | Journal paper - qualitative study   | Dementia                              | <b>44</b> |
| 10<br>11<br>12<br>13<br>14<br>15<br>16<br>17                                                                               | Casey                                                                                                               | 2004 | Early onset dementia: Getting out and about                                                                                            | <b>Small "out and about" social group</b> | UK | Specialist news article             | Journal of Dementia Care              | <b>45</b> |
| 18<br>19<br>20<br>21<br>22<br>23<br>24<br>25                                                                               | Clarke, Keyes, Wilkinson, Alexjuk, Wilcockson, Robinson, Corner & Cattan                                            | 2014 | Organisational space for partnership and sustainability: lessons from the implementation of the National Dementia Strategy for England | <b>Peer support networks</b>              | UK | Journal paper - strategy evaluation | Health & Social Care in the Community | <b>46</b> |
| 26<br>27<br>28<br>29<br>30<br>31<br>32<br>33<br>34<br>35<br>36<br>37<br>38<br>39<br>40<br>41<br>42<br>43<br>44<br>45<br>46 | Daykin, Julier, Tomlinson, Meads, Mansfield, Payne, Duffy, Lane, D'Innocenzo, Burnett, Kay, Dolan, Testoni & Victor | 2016 | Review of the grey literature: music, singing and wellbeing                                                                            | <b>Singing and musical activities</b>     | UK | Review/Report                       | What Works Wellbeing report           | <b>47</b> |

|                                                                                                                            |                                                       |      |                                                                                                               |                                               |       |                                      |                                   |           |
|----------------------------------------------------------------------------------------------------------------------------|-------------------------------------------------------|------|---------------------------------------------------------------------------------------------------------------|-----------------------------------------------|-------|--------------------------------------|-----------------------------------|-----------|
| 1<br>2<br>3<br>4<br>5<br>6<br>7<br>8<br>9<br>10                                                                            | Dean, Silversides, Crampton & Wrigley                 | 2015 | Evaluation of the Bradford Dementia Friendly Communities Programme                                            | <b>Activities and groups in the community</b> | UK    | Evaluation report                    | Joseph Rowntree Foundation report | <b>48</b> |
| 11<br>12<br>13<br>14<br>15<br>16<br>17                                                                                     | Dean, Silversides, Crampton & Wrigley                 | 2015 | Evaluation of the York Dementia Friendly Communities Programme                                                | <b>Activities and groups in the community</b> | UK    | Evaluation report                    | Joseph Rowntree Foundation report | <b>49</b> |
| 18<br>19<br>20<br>21<br>22<br>23<br>24<br>25                                                                               | Gajardo, Aravena, Budinich, Larrain, Fuentes & Gitlin | 2017 | The Kintun program for families with dementia: From novel experiment to national policy (innovative practice) | <b>Day centre and dementia community hub</b>  | Chile | Journal article - program evaluation | Dementia                          | <b>50</b> |
| 26<br>27<br>28<br>29<br>30<br>31<br>32<br>33<br>34<br>35<br>36<br>37<br>38<br>39<br>40<br>41<br>42<br>43<br>44<br>45<br>46 | Glover                                                | 2014 | Running self-help groups in sheltered and extra care accommodation for people who live with dementia          | <b>Self-help social and activity groups</b>   | UK    | Information/guide booklet            | Mental Health Foundation          | <b>51</b> |

|                                                     |      |                                                                                                           |                                                                              |           |                                    |                                                           |           |
|-----------------------------------------------------|------|-----------------------------------------------------------------------------------------------------------|------------------------------------------------------------------------------|-----------|------------------------------------|-----------------------------------------------------------|-----------|
| Gottlieb-Tanaka                                     | 2006 | Creative expression, dementia and the therapeutic environment                                             | <b>Art/creative activities in a day centre environment</b>                   | Canada    | Dissertation/Thesis                |                                                           | <b>52</b> |
| Green & Lakey (Alzheimer's Society)                 | 2013 | Building dementia-friendly communities: a priority for everyone                                           | <b>Dementia Friendly Communities</b> - various social and leisure activities | UK        | Report                             | Alzheimer's Society                                       | <b>53</b> |
| Grinberg, Lagunoff, Phillips, Stern, Goodman & Chow | 2007 | Multidisciplinary design and implementation of a day program specialized for the frontotemporal dementias | <b>Day program</b> for people with FTD                                       | Canada    | Journal paper - program evaluation | American Journal of Alzheimer's Disease & Other Dementias | <b>54</b> |
| Hayes & Williamson                                  | 2007 | Men's Sheds: Exploring the Evidence for Best Practice                                                     | <b>Men's Sheds</b>                                                           | Australia | Evaluation report                  | School of Public Health, La Trobe University              | <b>55</b> |

1  
2  
3  
4  
5  
6  
7  
8  
9  
10  
11  
12  
13  
14  
15  
16  
17  
18  
19  
20  
21  
22  
23  
24  
25  
26  
27  
28  
29  
30  
31  
32  
33  
34  
35  
36  
37  
38  
39  
40  
41  
42  
43  
44  
45  
46

|                                                                                                               |      |                                                                                                                    |                                                      |       |                                    |                                        |           |
|---------------------------------------------------------------------------------------------------------------|------|--------------------------------------------------------------------------------------------------------------------|------------------------------------------------------|-------|------------------------------------|----------------------------------------|-----------|
| Health Innovation Network South London** (**see also linked films within document plus 2015 HIN Case Studies) | 2015 | Peer Support for People with Dementia Resource Pack                                                                | A range of <b>peer support groups and activities</b> | UK    | Information/guide booklet          | Health Innovation Network South London | <b>56</b> |
| Health Innovation Network South London                                                                        | 2015 | Case Study: Dulwich Helpline and Southwark Churches Care (DH&SCC) – The Dementia Project, Southwark, South London. | <b>Peer support project</b>                          | UK    | Information/guide booklet          | Health Innovation Network South London | <b>57</b> |
| Health Innovation Network South London                                                                        | 2015 | Case Study: The Healthy Living Club (HLC) – A self-directed, dementia-centred community group in Stockwell, London | <b>Peer support group</b>                            | UK    | Information/guide booklet          | Health Innovation Network South London | <b>58</b> |
| Hikichi, Kondo, Takeda & Kawachi                                                                              | 2017 | Social interaction and cognitive decline: Results of a 7-year community intervention                               | <b>Community centres for older people</b>            | Japan | Journal paper - longitudinal study | Alzheimer's & Dementia                 | <b>59</b> |

|                                                                            |      |                                                                                                                                                                  |                                                                      |         |                                                    |                                     |           |
|----------------------------------------------------------------------------|------|------------------------------------------------------------------------------------------------------------------------------------------------------------------|----------------------------------------------------------------------|---------|----------------------------------------------------|-------------------------------------|-----------|
| Hochgraeber, Bartholomeyczik & Holle** (**See also Hochgraeber et al 2017) | 2012 | Low-threshold support for families with dementia in Germany                                                                                                      | <b>"Low threshold" support services including social care groups</b> | Germany | Journal paper - survey protocol                    | BMC Research Notes                  | <b>60</b> |
| Hochgraeber, Von Kutzleben, Bartholomeyczik & Holle                        | 2017 | Low-threshold support services for people with dementia within the scope of respite care in Germany – A qualitative study on different stakeholders' perspective | <b>"Low threshold" support services including social care groups</b> | Germany | Journal paper - qualitative study                  | Dementia                            | <b>61</b> |
| Jackson                                                                    | 2017 | The Debenham Project: Project Blog and Catch-Up                                                                                                                  | Range of local <b>support groups and activities</b>                  | UK      | Project blog newsletter/report                     | Debenham Project                    | <b>62</b> |
| Kelsey & Laditka                                                           | 2005 | Evaluating best practices for social model programs for adults with Alzheimer's disease in South Carolina                                                        | <b>"Social model" day care</b>                                       | US      | Journal paper - review and survey of best practice | Home Health Care Services Quarterly | <b>63</b> |



|                                                                |      |                                                                                                                                                                                   |                                                                             |    |                                                |                                                           |           |
|----------------------------------------------------------------|------|-----------------------------------------------------------------------------------------------------------------------------------------------------------------------------------|-----------------------------------------------------------------------------|----|------------------------------------------------|-----------------------------------------------------------|-----------|
| La Rue, Felten, Duschene, MacFarlane, Price, Zimmerman & Havez | 2013 | Language-enriched exercise plus socialization for older adults with dementia: Translation to rural communities                                                                    | <b>Language, exercise and socialisation program</b>                         | US | Journal paper - trial program in rural setting | Seminars in Speech and Language                           | <b>64</b> |
| La Rue, Felten & Turkstra                                      | 2015 | Intervention of Multi-Modal Activities for Older Adults With Dementia Translation to Rural Communities                                                                            | <b>Language, exercise and socialisation program</b>                         | US | Journal paper - trial program in rural setting | American Journal of Alzheimer's Disease & Other Dementias | <b>65</b> |
| LeBlanc                                                        | 2010 | Integrating behavioral psychology services into adult day programming for individuals with dementia                                                                               | <b>Day care (for people with dementia exhibiting challenging behaviour)</b> | US | Journal paper - program evaluation             | Behavior Modification                                     | <b>66</b> |
| Lockwood                                                       | 2012 | The Debenham Project: A case study of a unique community-led and owned project dedicated to the support of carers of those that have symptoms of dementia and those they care for | <b>Range of local support groups and activities</b>                         | UK | Case study report                              | Community Catalysts                                       | <b>67</b> |

|                                                                   |                                                                                                                                         |      |                                                                                                                             |                                                                                         |                                |                                    |                                     |           |
|-------------------------------------------------------------------|-----------------------------------------------------------------------------------------------------------------------------------------|------|-----------------------------------------------------------------------------------------------------------------------------|-----------------------------------------------------------------------------------------|--------------------------------|------------------------------------|-------------------------------------|-----------|
| 1<br>2<br>3<br>4<br>5<br>6<br>7<br>8<br>9<br>10<br>11<br>12<br>13 | Mangiaracina, Chattat, Farina, Saibene, Gamberini, Brooker, Evans, Evans, Szcześniak, Urbanska, Rymaszewska, Hendricks, Dröes & Meiland | 2017 | Not re-inventing the wheel: the adaptive implementation of the meeting centres support programme in four European countries | <b>Meeting Centres</b>                                                                  | Netherlands, Italy, Poland, UK | Journal paper - project evaluation | Aging & Mental Health               | <b>68</b> |
| 14<br>15<br>16<br>17<br>18<br>19<br>20                            | Mapes, Milton, Nicholls & Williamson (Natural England)                                                                                  | 2016 | Is it nice outside? Consulting people living with dementia and their carers about engaging with the natural environment     | <b>Outdoor activities</b>                                                               | UK                             | Report                             | Natural England report              | <b>69</b> |
| 21<br>22<br>23<br>24<br>25<br>26<br>27                            | Marshall & Jackson                                                                                                                      | 2015 | Encouraging and supporting the growth of "dementia proactive communities"                                                   | <b>Dementia proactive communities</b><br>(Range of local support groups and activities) | UK                             | Report                             | Debenham Project & Sue Ryder        | <b>70</b> |
| 28<br>29<br>30<br>31<br>32<br>33<br>34<br>35<br>36                | Mason & Slack                                                                                                                           | 2013 | The Debenham Project: Research into the dementia/memory loss journey for cared-for and carer, 2012-13                       | Range of local support groups and activities                                            | UK                             | Evaluation report - survey         | Norfolk & Suffolk Dementia Alliance | <b>71</b> |

37  
38  
39  
40  
41  
42  
43  
44  
45  
46

1  
2  
3  
4  
5  
6  
7  
8  
9  
10  
11  
12  
13  
14  
15  
16  
17  
18  
19  
20  
21  
22  
23  
24  
25  
26  
27  
28  
29  
30  
31  
32  
33  
34  
35  
36  
37  
38  
39  
40  
41  
42  
43  
44  
45  
46

|                                            |      |                                                                                                                                              |                                                                                            |             |                                                            |                                                             |           |
|--------------------------------------------|------|----------------------------------------------------------------------------------------------------------------------------------------------|--------------------------------------------------------------------------------------------|-------------|------------------------------------------------------------|-------------------------------------------------------------|-----------|
| McAiney, Hillier, Stolee, Harvey & Michael | 2012 | 'Throwing a lifeline': the role of First Link in enhancing support for individuals with dementia and their caregivers                        | Information on and links between <b>support services (including groups and activities)</b> | Canada      | Journal paper - evaluation                                 | Neurodegenerative Disease Management (Future Medicine)      | <b>72</b> |
| McDonald & Heath                           | 2009 | Developing services for people with dementia                                                                                                 | <b>General dementia support services</b> in rural areas                                    | UK          | Journal short report feature - review of service provision | Working with Older People: Community Care Policy & Practice | <b>73</b> |
| The Me Myself and I Club                   | 2018 | The Me, Myself and I Club, Briton Ferry: A case study in warm humanity and meaningful co-production                                          | <b>Friendship club and support services</b>                                                | UK (Wales)  | Programme/service report                                   | Me Myself and I Club                                        | <b>74</b> |
| Meiland, Dröes, De Lang & Vernooij-Dassen  | 2004 | Development of a theoretical model for tracing facilitators and barriers in adaptive implementation of innovative practices in dementia care | <b>Meeting centres</b>                                                                     | Netherlands | Journal paper - model development                          | Archives Of Gerontology And Geriatrics Supplement           | <b>75</b> |

|                                           |      |                                                                                                                        |                            |             |                                              |                                 |           |
|-------------------------------------------|------|------------------------------------------------------------------------------------------------------------------------|----------------------------|-------------|----------------------------------------------|---------------------------------|-----------|
| Meiland, Dröes, De Lang & Vernooij-Dassen | 2005 | Facilitators and barriers in the implementation of the Meeting Centres model for people with dementia and their carers | <b>Meeting centres</b>     | Netherlands | Journal paper - model test                   | Health Policy                   | <b>76</b> |
| The Mental Health Foundation              | 2018 | An evaluation of the Standing Together project                                                                         | <b>Peer support groups</b> | UK          | Evaluation report                            | Mental Health Foundation report | <b>77</b> |
| Milligan, Payne, Bingley & Cockshott      | 2015 | Place and wellbeing: shedding light on activity interventions for older men                                            | <b>Men's Sheds</b>         | UK          | Journal paper - qualitative study of program | Ageing & Society                | <b>78</b> |
| Moore                                     | 2002 | Observed affect in a dementia day center: Does the physical setting matter?                                            | <b>Day centre</b>          | US          | Journal paper - case study/field observation | Alzheimer's Care Quarterly      | <b>79</b> |

1  
2  
3  
4  
5  
6  
7  
8  
9  
10  
11  
12  
13  
14  
15  
16  
17  
18  
19  
20  
21  
22  
23  
24  
25  
26  
27  
28  
29  
30  
31  
32  
33  
34  
35  
36  
37  
38  
39  
40  
41  
42  
43  
44  
45  
46

|                                       |      |                                                                                                                                                                            |                                                             |            |                     |                                              |           |
|---------------------------------------|------|----------------------------------------------------------------------------------------------------------------------------------------------------------------------------|-------------------------------------------------------------|------------|---------------------|----------------------------------------------|-----------|
| Noimuenwai                            | 2012 | Effectiveness of adult day care programs on health outcomes of Thai family caregivers of persons with dementia                                                             | <b>Day care (Thailand)</b>                                  | Thailand   | Dissertation/Thesis |                                              | <b>80</b> |
| NVCO                                  | 2019 | How To Fundraise In Tough Times                                                                                                                                            | <b>Third sector and non-profit organisations in general</b> | UK         | Information guide   | NCVO Knowhow website                         | <b>81</b> |
| Older People's Commissioner for Wales | 2018 | Rethinking respite for people affected by dementia                                                                                                                         | <b>Respite/day services</b>                                 | UK (Wales) | Report              | Older People's Commissioner for Wales report | <b>82</b> |
| Oliver-Watkins, Kendall & Matthews    | 2016 | Sow & Grow: Report from a two-year Social and Therapeutic Horticultural (STH) programme delivering table-top gardening courses to adults in the community aged 50 and over | <b>Gardening groups</b>                                     | UK         | Evaluation report   | Sow & Grow                                   | <b>83</b> |

|    |                                                    |      |                                                                                                                                         |                                                                                 |         |                                       |                                    |           |
|----|----------------------------------------------------|------|-----------------------------------------------------------------------------------------------------------------------------------------|---------------------------------------------------------------------------------|---------|---------------------------------------|------------------------------------|-----------|
| 1  | Reichet & Wolter                                   | 2017 | Implementing physical activity programs for people with dementia: Results from a German study                                           | <b>Sports club initiatives</b>                                                  | Germany | Poster presentation                   |                                    | <b>84</b> |
| 2  |                                                    |      |                                                                                                                                         |                                                                                 |         |                                       |                                    |           |
| 3  | Reichet & Wolter                                   | 2017 | Implementing physical activity programs for people with dementia: Results from a German study                                           | <b>Sports club initiatives</b>                                                  | Germany | Conference abstract                   | Innovation in Aging (Supplement)   | <b>85</b> |
| 4  |                                                    |      |                                                                                                                                         |                                                                                 |         |                                       |                                    |           |
| 5  |                                                    |      |                                                                                                                                         |                                                                                 |         |                                       |                                    |           |
| 6  |                                                    |      |                                                                                                                                         |                                                                                 |         |                                       |                                    |           |
| 7  |                                                    |      |                                                                                                                                         |                                                                                 |         |                                       |                                    |           |
| 8  |                                                    |      |                                                                                                                                         |                                                                                 |         |                                       |                                    |           |
| 9  |                                                    |      |                                                                                                                                         |                                                                                 |         |                                       |                                    |           |
| 10 |                                                    |      |                                                                                                                                         |                                                                                 |         |                                       |                                    |           |
| 11 |                                                    |      |                                                                                                                                         |                                                                                 |         |                                       |                                    |           |
| 12 |                                                    |      |                                                                                                                                         |                                                                                 |         |                                       |                                    |           |
| 13 |                                                    |      |                                                                                                                                         |                                                                                 |         |                                       |                                    |           |
| 14 |                                                    |      |                                                                                                                                         |                                                                                 |         |                                       |                                    |           |
| 15 |                                                    |      |                                                                                                                                         |                                                                                 |         |                                       |                                    |           |
| 16 |                                                    |      |                                                                                                                                         |                                                                                 |         |                                       |                                    |           |
| 17 |                                                    |      |                                                                                                                                         |                                                                                 |         |                                       |                                    |           |
| 18 | Rio                                                | 2018 | A Community-Based Music Therapy Support Group for People With Alzheimer's Disease and Their Caregivers: A Sustainable Partnership Model | <b>Music therapy group</b>                                                      | US      | Journal paper - program evaluation    | Frontiers In Medicine              | <b>86</b> |
| 19 |                                                    |      |                                                                                                                                         |                                                                                 |         |                                       |                                    |           |
| 20 |                                                    |      |                                                                                                                                         |                                                                                 |         |                                       |                                    |           |
| 21 |                                                    |      |                                                                                                                                         |                                                                                 |         |                                       |                                    |           |
| 22 |                                                    |      |                                                                                                                                         |                                                                                 |         |                                       |                                    |           |
| 23 |                                                    |      |                                                                                                                                         |                                                                                 |         |                                       |                                    |           |
| 24 |                                                    |      |                                                                                                                                         |                                                                                 |         |                                       |                                    |           |
| 25 |                                                    |      |                                                                                                                                         |                                                                                 |         |                                       |                                    |           |
| 26 | Shnall, Agate, Grinberg, Huijbregts, Nguyen & Chow | 2013 | Development of supportive services for frontotemporal dementias through community engagement                                            | <b>Day program for FTD (plus online groups and resources for family carers)</b> | Canada  | Journal paper - review of initiatives | International Review of Psychiatry | <b>87</b> |
| 27 |                                                    |      |                                                                                                                                         |                                                                                 |         |                                       |                                    |           |
| 28 |                                                    |      |                                                                                                                                         |                                                                                 |         |                                       |                                    |           |
| 29 |                                                    |      |                                                                                                                                         |                                                                                 |         |                                       |                                    |           |
| 30 |                                                    |      |                                                                                                                                         |                                                                                 |         |                                       |                                    |           |
| 31 |                                                    |      |                                                                                                                                         |                                                                                 |         |                                       |                                    |           |
| 32 |                                                    |      |                                                                                                                                         |                                                                                 |         |                                       |                                    |           |
| 33 |                                                    |      |                                                                                                                                         |                                                                                 |         |                                       |                                    |           |
| 34 |                                                    |      |                                                                                                                                         |                                                                                 |         |                                       |                                    |           |
| 35 |                                                    |      |                                                                                                                                         |                                                                                 |         |                                       |                                    |           |
| 36 |                                                    |      |                                                                                                                                         |                                                                                 |         |                                       |                                    |           |
| 37 |                                                    |      |                                                                                                                                         |                                                                                 |         |                                       |                                    |           |
| 38 |                                                    |      |                                                                                                                                         |                                                                                 |         |                                       |                                    |           |
| 39 |                                                    |      |                                                                                                                                         |                                                                                 |         |                                       |                                    |           |
| 40 |                                                    |      |                                                                                                                                         |                                                                                 |         |                                       |                                    |           |
| 41 |                                                    |      |                                                                                                                                         |                                                                                 |         |                                       |                                    |           |
| 42 |                                                    |      |                                                                                                                                         |                                                                                 |         |                                       |                                    |           |
| 43 |                                                    |      |                                                                                                                                         |                                                                                 |         |                                       |                                    |           |
| 44 |                                                    |      |                                                                                                                                         |                                                                                 |         |                                       |                                    |           |
| 45 |                                                    |      |                                                                                                                                         |                                                                                 |         |                                       |                                    |           |
| 46 |                                                    |      |                                                                                                                                         |                                                                                 |         |                                       |                                    |           |

1  
2  
3  
4  
5  
6  
7  
8  
9  
10  
11  
12  
13  
14  
15  
16  
17  
18  
19  
20  
21  
22  
23  
24  
25  
26  
27  
28  
29  
30  
31  
32  
33  
34  
35  
36  
37  
38  
39  
40  
41  
42  
43  
44  
45  
46

|                            |      |                                                                                                                                                             |                                                         |        |                                            |                                                |           |
|----------------------------|------|-------------------------------------------------------------------------------------------------------------------------------------------------------------|---------------------------------------------------------|--------|--------------------------------------------|------------------------------------------------|-----------|
| Solutions Research         | 2016 | Public perceptions and experiences of community-based end of life care initiatives: a qualitative research report                                           | <b>Community-based support initiatives</b> of all kinds | UK     | Report                                     | Public Health England report                   | <b>88</b> |
| Strandenæs, Lund & Rokstad | 2018 | Experiences of attending day care services designed for people with dementia - a qualitative study with individual interviews                               | <b>Day care</b>                                         | Norway | Journal paper - qualitative study          | Aging & Mental Health                          | <b>89</b> |
| Thrive                     | 2012 | Growing4life - A Thrive Community Gardening Project: A practical guide to setting up a community gardening project for people affected by mental ill health | <b>Gardening groups</b>                                 | UK     | Information/guide booklet                  | Thrive (The Society for Horticultural Therapy) | <b>90</b> |
| Tuppen                     | 2012 | The benefits of groups that provide cognitive stimulation for people with dementia                                                                          | <b>Cognitive stimulation clubs</b>                      | UK     | Journal article - overview of intervention | Nursing Older People                           | <b>91</b> |

|                                                                                                                               |      |                                                                                                                                                                                    |                                    |                                |                                         |                                                    |           |
|-------------------------------------------------------------------------------------------------------------------------------|------|------------------------------------------------------------------------------------------------------------------------------------------------------------------------------------|------------------------------------|--------------------------------|-----------------------------------------|----------------------------------------------------|-----------|
| Tuppen & Jones                                                                                                                | 2015 | Cogs Clubs: a helpful activity in early dementia                                                                                                                                   | <b>Cognitive stimulation clubs</b> | UK                             | Specialist news article                 | Journal of Dementia Care                           | <b>92</b> |
| Van Haeften-van Dijk, Meiland, van Mierlo & Dröes                                                                             | 2015 | Transforming nursing home-based day care for people with dementia into socially integrated community day care: Process analysis of the transition of six day care centres          | <b>Meeting centres</b>             | Netherlands                    | Journal paper - process evaluation      | International Journal of Nursing Studies           | <b>93</b> |
| Van Mierlo, Chattat, Evans, Brooker, Saibene, Gamberini, Farina, Scorolli, Szcześniak, Urbańska, Rymaszewska, Dröes & Meiland | 2018 | Facilitators and barriers to adaptive implementation of the Meeting Centers Support Program (MCSP) in three European countries; the process evaluation within the MEETINGDEM study | <b>Meeting centres</b>             | Netherlands, Italy, Poland, UK | Journal paper - program evaluation      | International Psychogeriatrics                     | <b>94</b> |
| Williams & Roberts                                                                                                            | 1995 | Friends in passing: social interaction at an adult day care center                                                                                                                 | <b>Adult day care centre</b>       | US                             | Journal paper - participant observation | International Journal Of Aging & Human Development | <b>95</b> |



1  
2  
3  
4  
5  
6  
7  
8  
9  
10  
11  
12  
13  
14  
15  
16  
17  
18  
19  
20  
21  
22  
23  
24  
25  
26  
27  
28  
29  
30  
31  
32  
33  
34  
35  
36  
37  
38  
39  
40  
41  
42  
43  
44  
45  
46

|                                                                                             |      |                                                                                |                            |        |                               |                 |           |
|---------------------------------------------------------------------------------------------|------|--------------------------------------------------------------------------------|----------------------------|--------|-------------------------------|-----------------|-----------|
| Wimo, Wallin, Lundgren, Ronnback, Asplund, Mattsson & Krakau (see also Clarkson et al 2017) | 1990 | Impact of Day Care on Dementia Patients—Costs, Well-being and Relatives' Views | <b>Specialist day care</b> | Sweden | Journal paper - cost analysis | Family Practice | <b>96</b> |
|---------------------------------------------------------------------------------------------|------|--------------------------------------------------------------------------------|----------------------------|--------|-------------------------------|-----------------|-----------|

For peer review only

Supplementary file 4: Diagrams of factors involved in each critical sub-outcome area

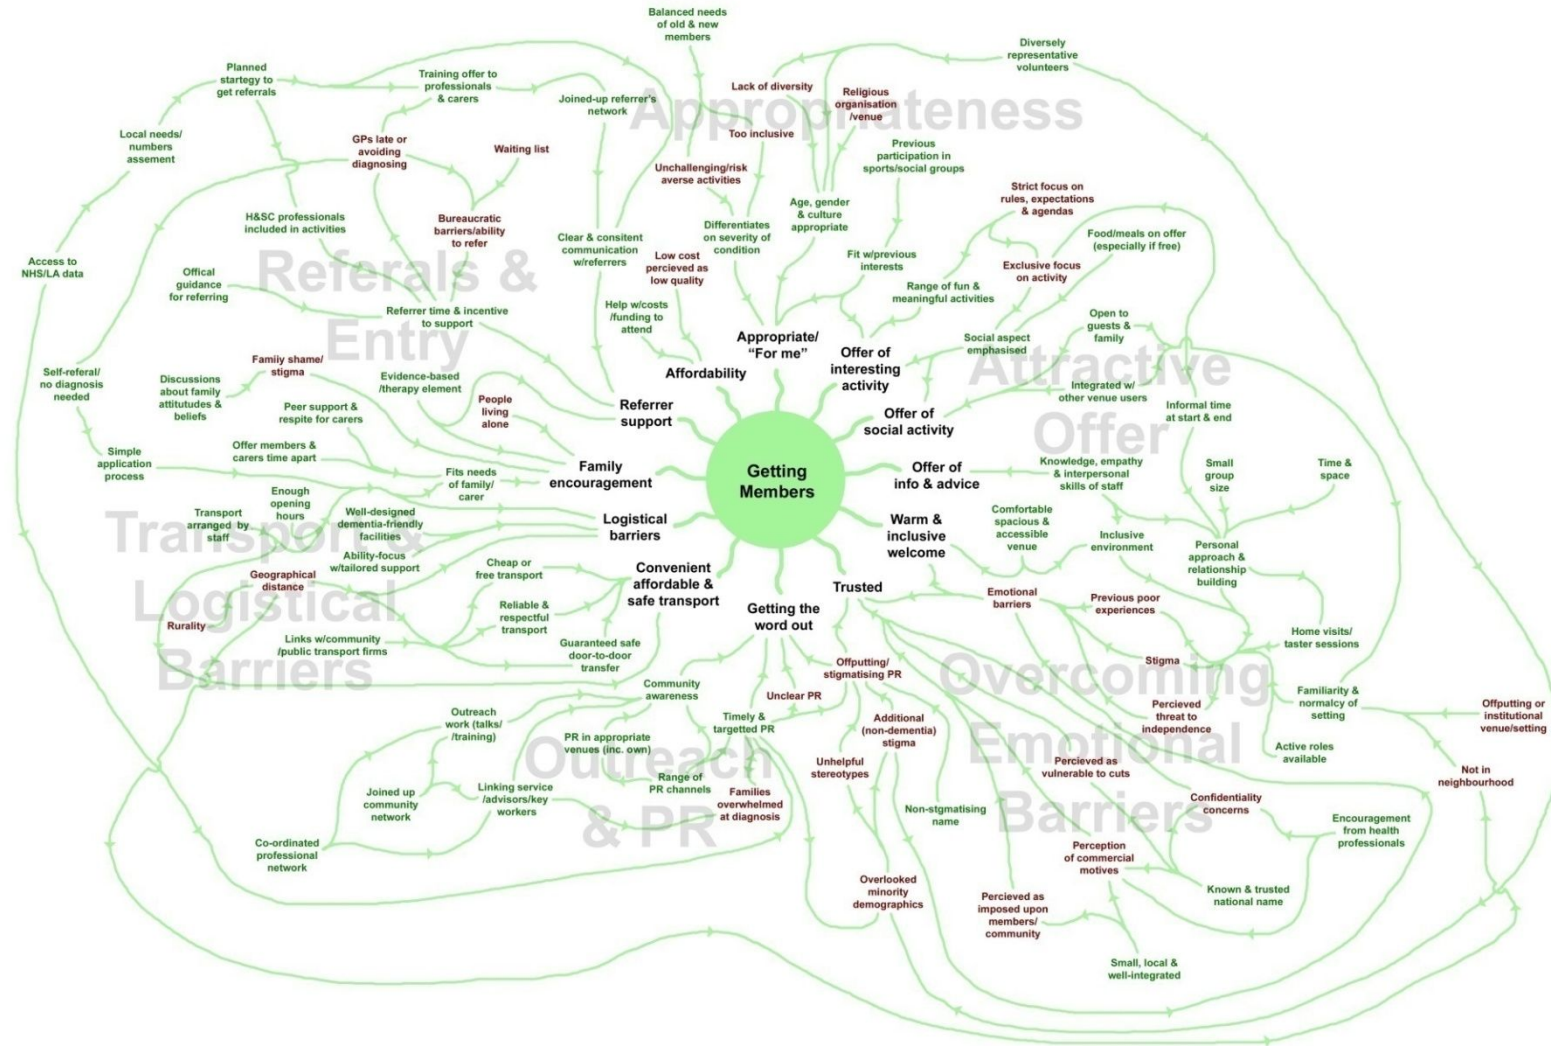

1  
2  
3  
4  
5  
6  
7  
8  
9  
10  
11  
12  
13  
14  
15  
16  
17  
18  
19  
20  
21  
22  
23  
24  
25  
26  
27  
28  
29  
30  
31  
32  
33  
34  
35  
36  
37  
38  
39  
40  
41  
42  
43  
44  
45  
46

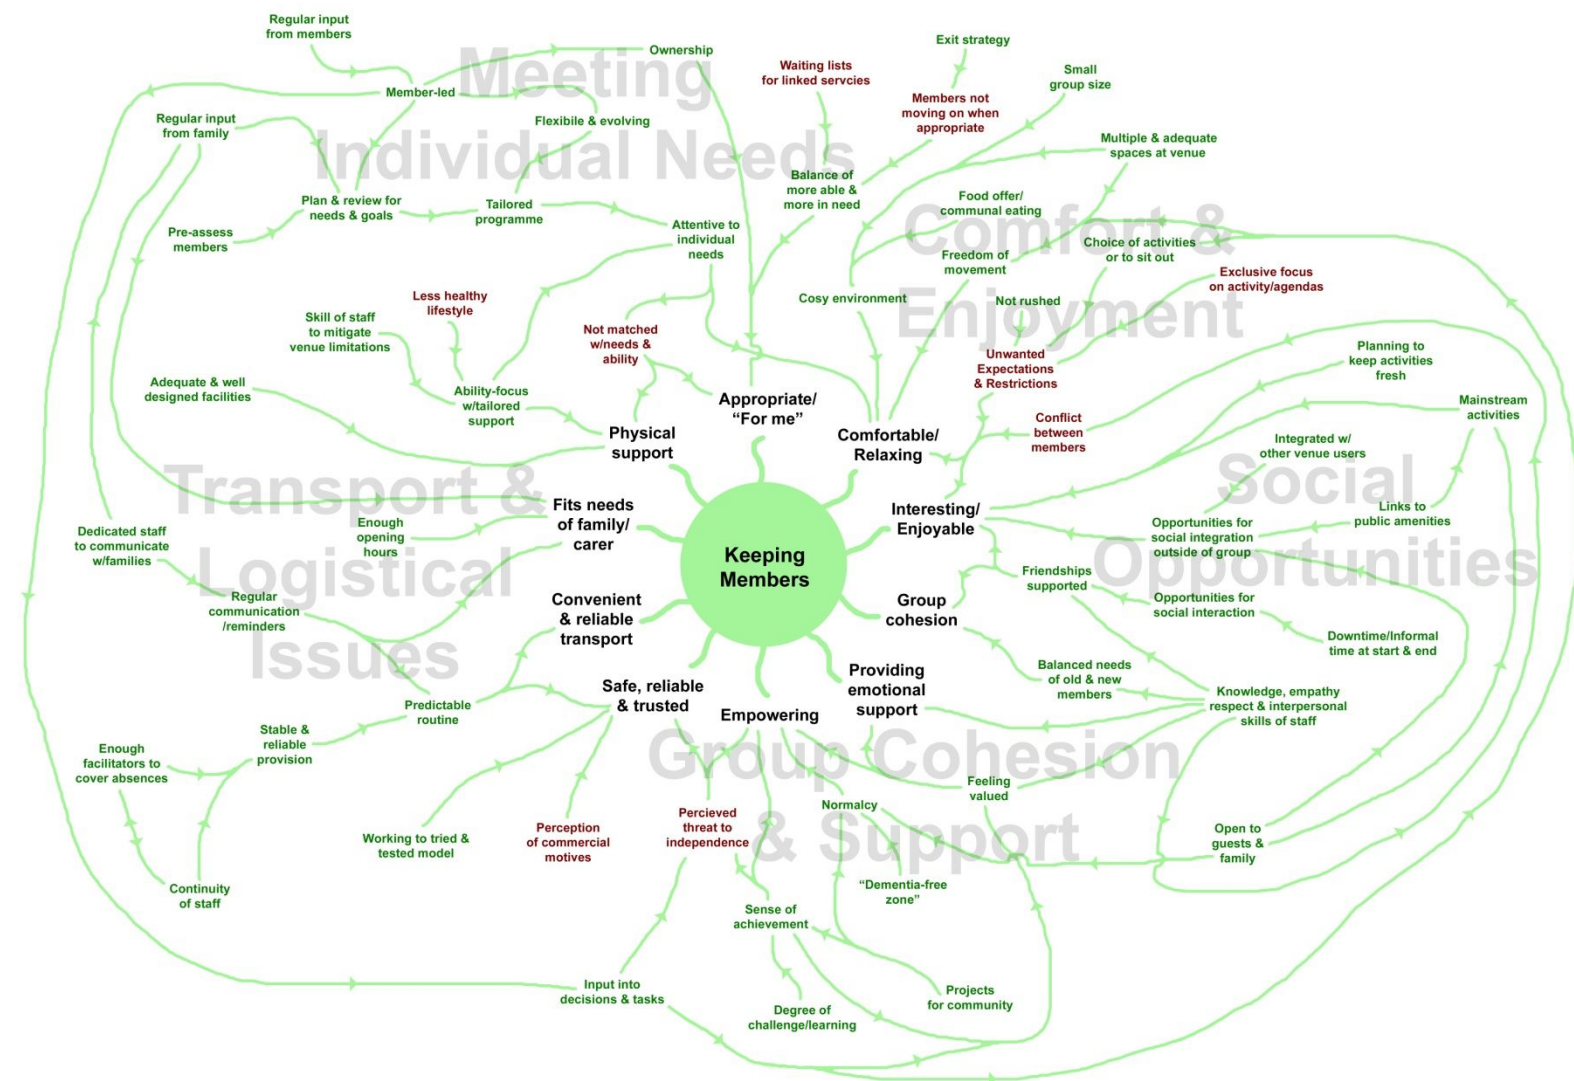

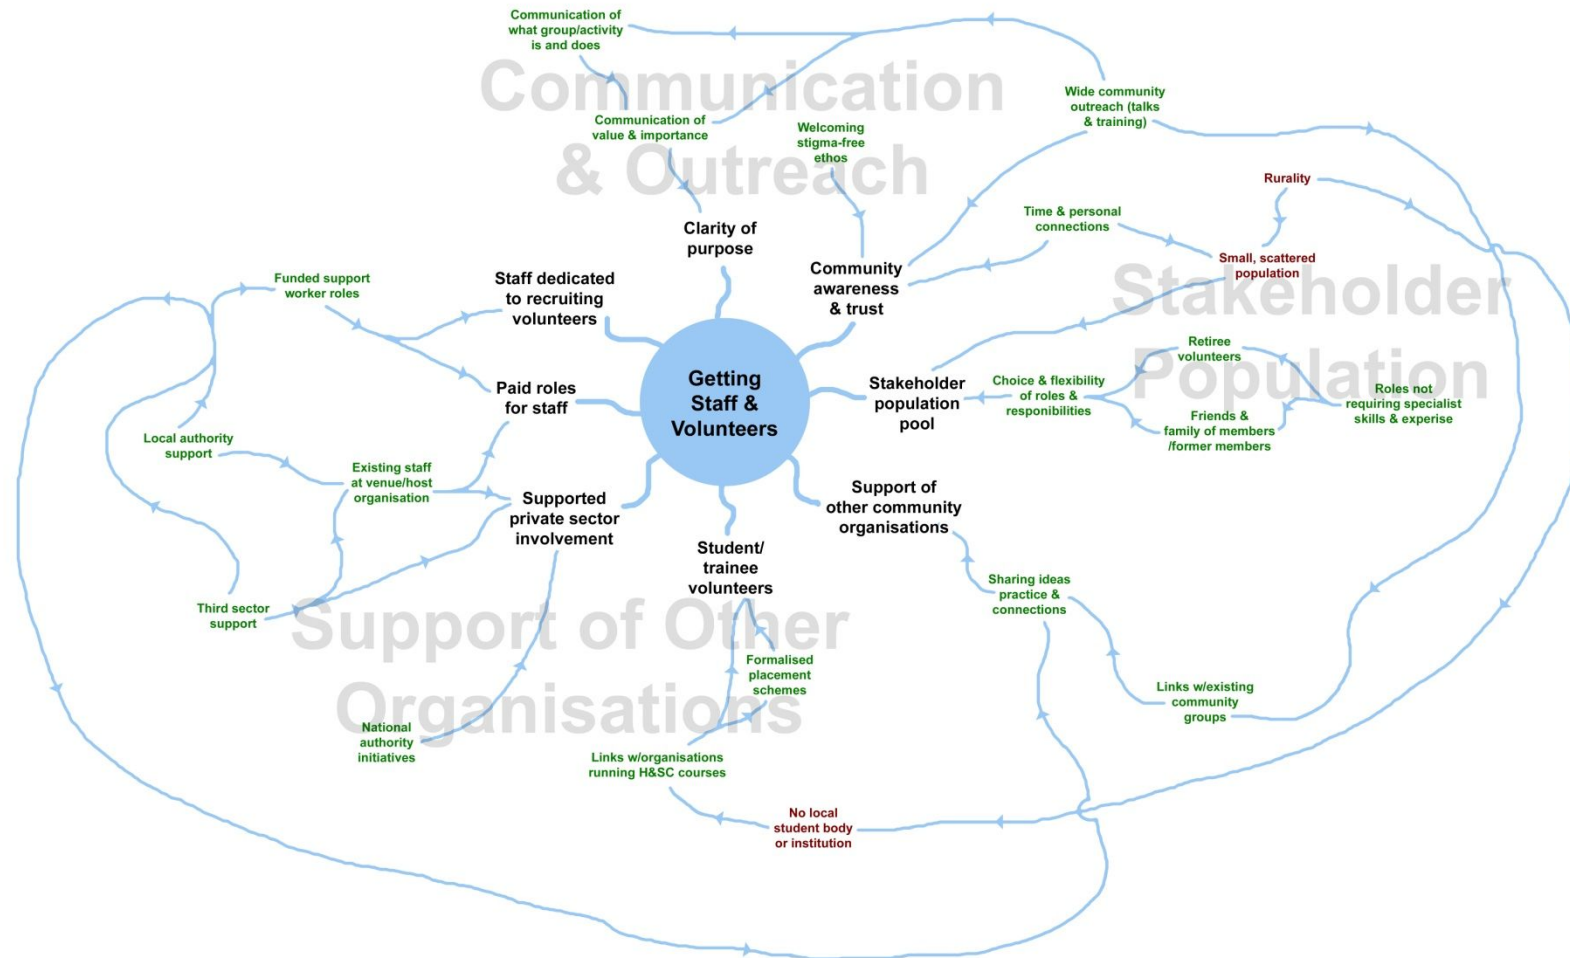



1  
2  
3  
4  
5  
6  
7  
8  
9  
10  
11  
12  
13  
14  
15  
16  
17  
18  
19  
20  
21  
22  
23  
24  
25  
26  
27  
28  
29  
30  
31  
32  
33  
34  
35  
36  
37  
38  
39  
40  
41  
42  
43  
44  
45  
46

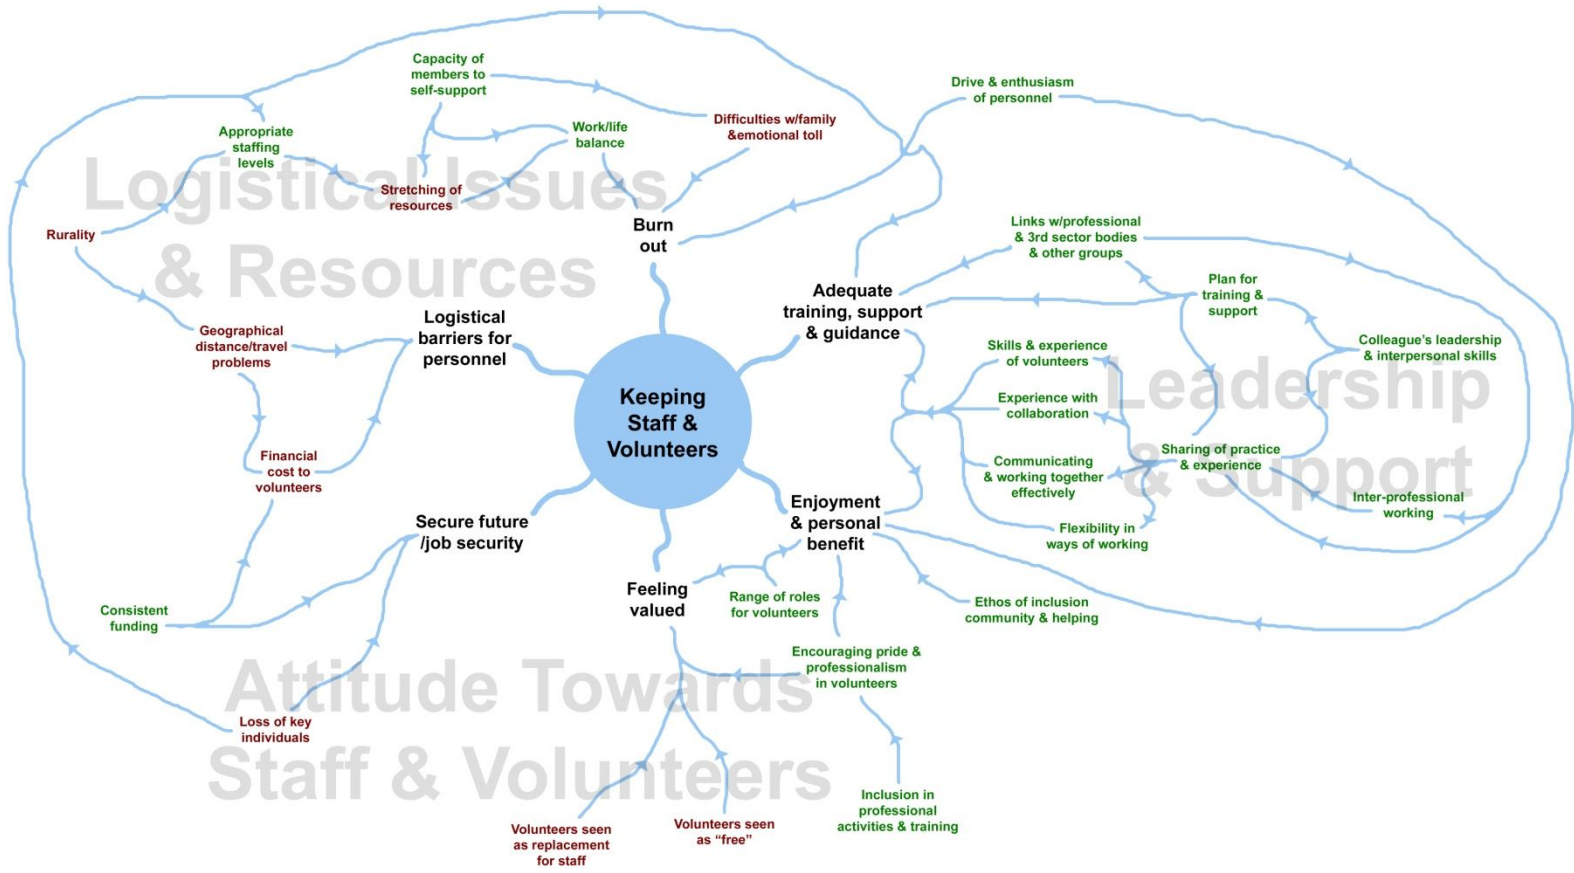

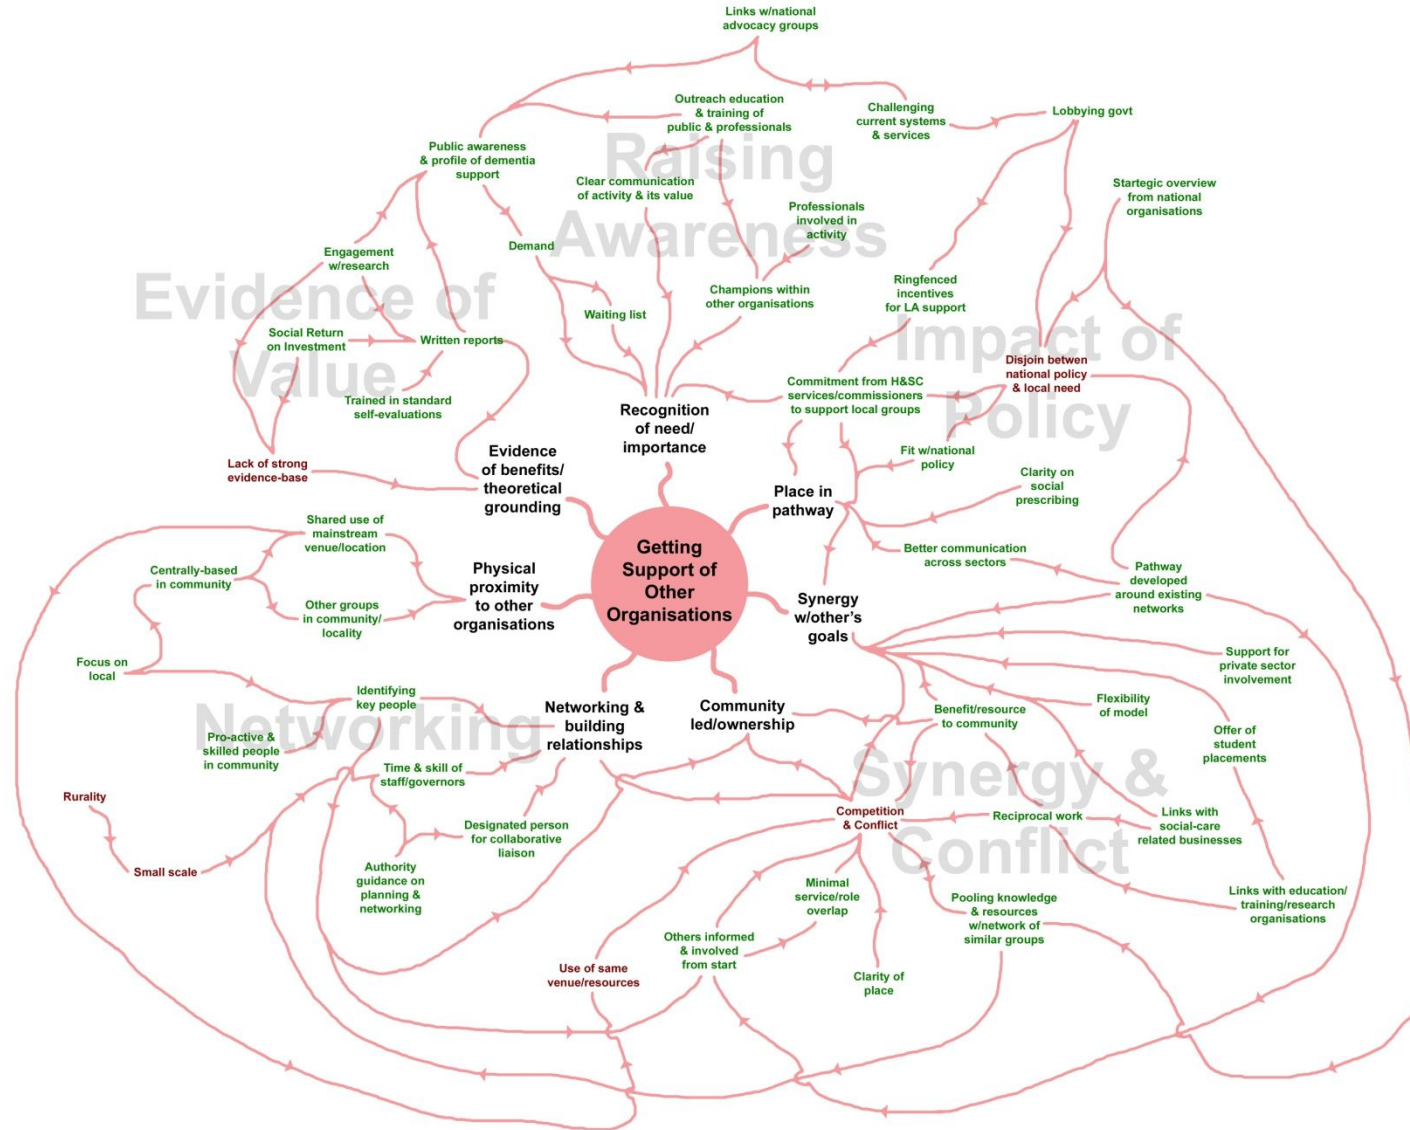

1  
2  
3  
4  
5  
6  
7  
8  
9  
10  
11  
12  
13  
14  
15  
16  
17  
18  
19  
20  
21  
22  
23  
24  
25  
26  
27  
28  
29  
30  
31  
32  
33  
34  
35  
36  
37  
38  
39  
40  
41  
42  
43  
44  
45  
46

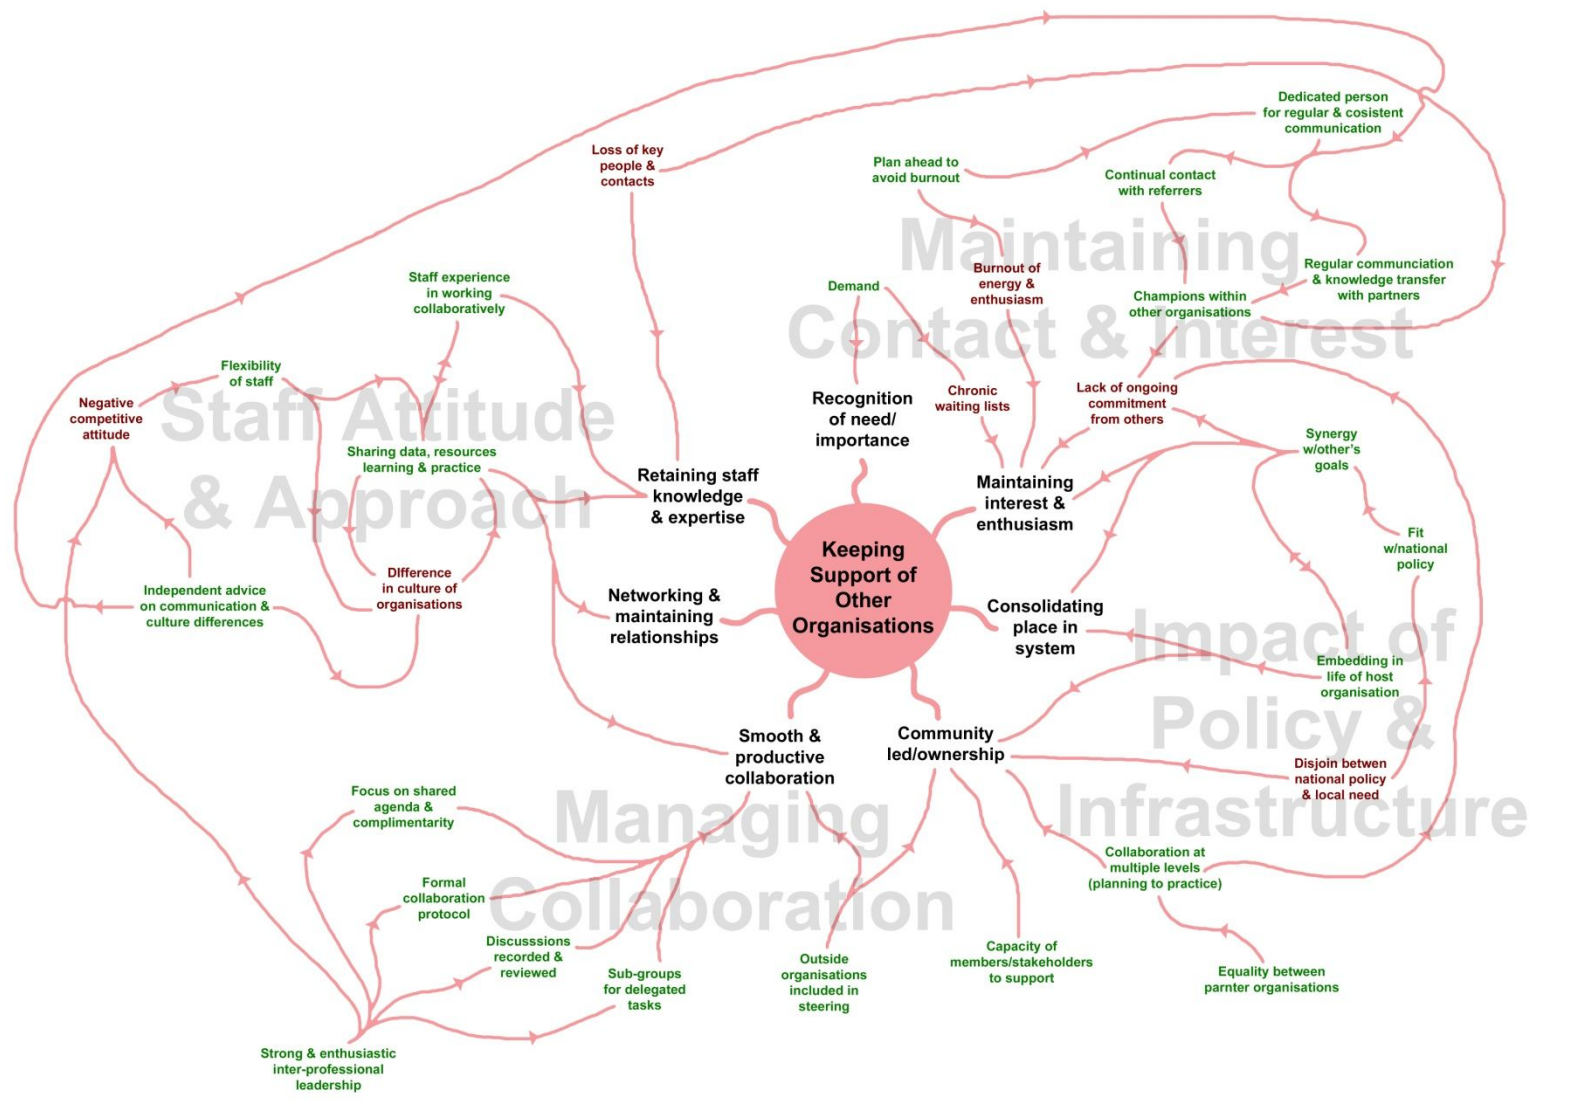

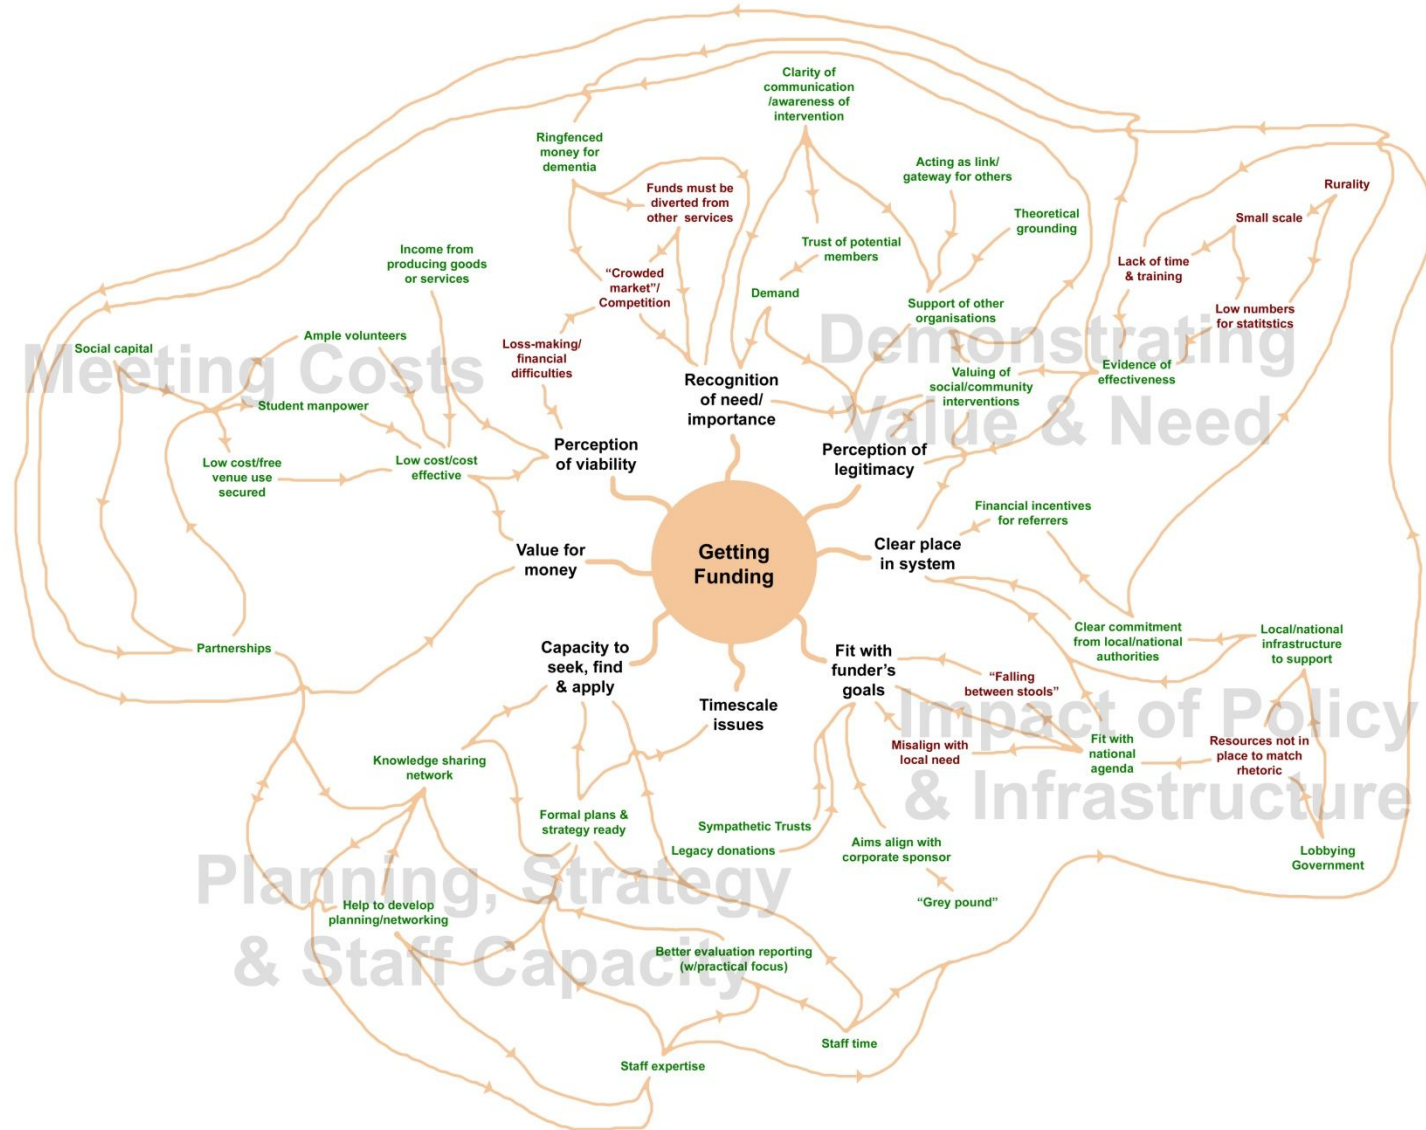



1  
2  
3  
4  
5  
6  
7  
8  
9  
10  
11  
12  
13  
14  
15  
16  
17  
18  
19  
20  
21  
22  
23  
24  
25  
26  
27  
28  
29  
30  
31  
32  
33  
34  
35  
36  
37  
38  
39  
40  
41  
42  
43  
44  
45  
46

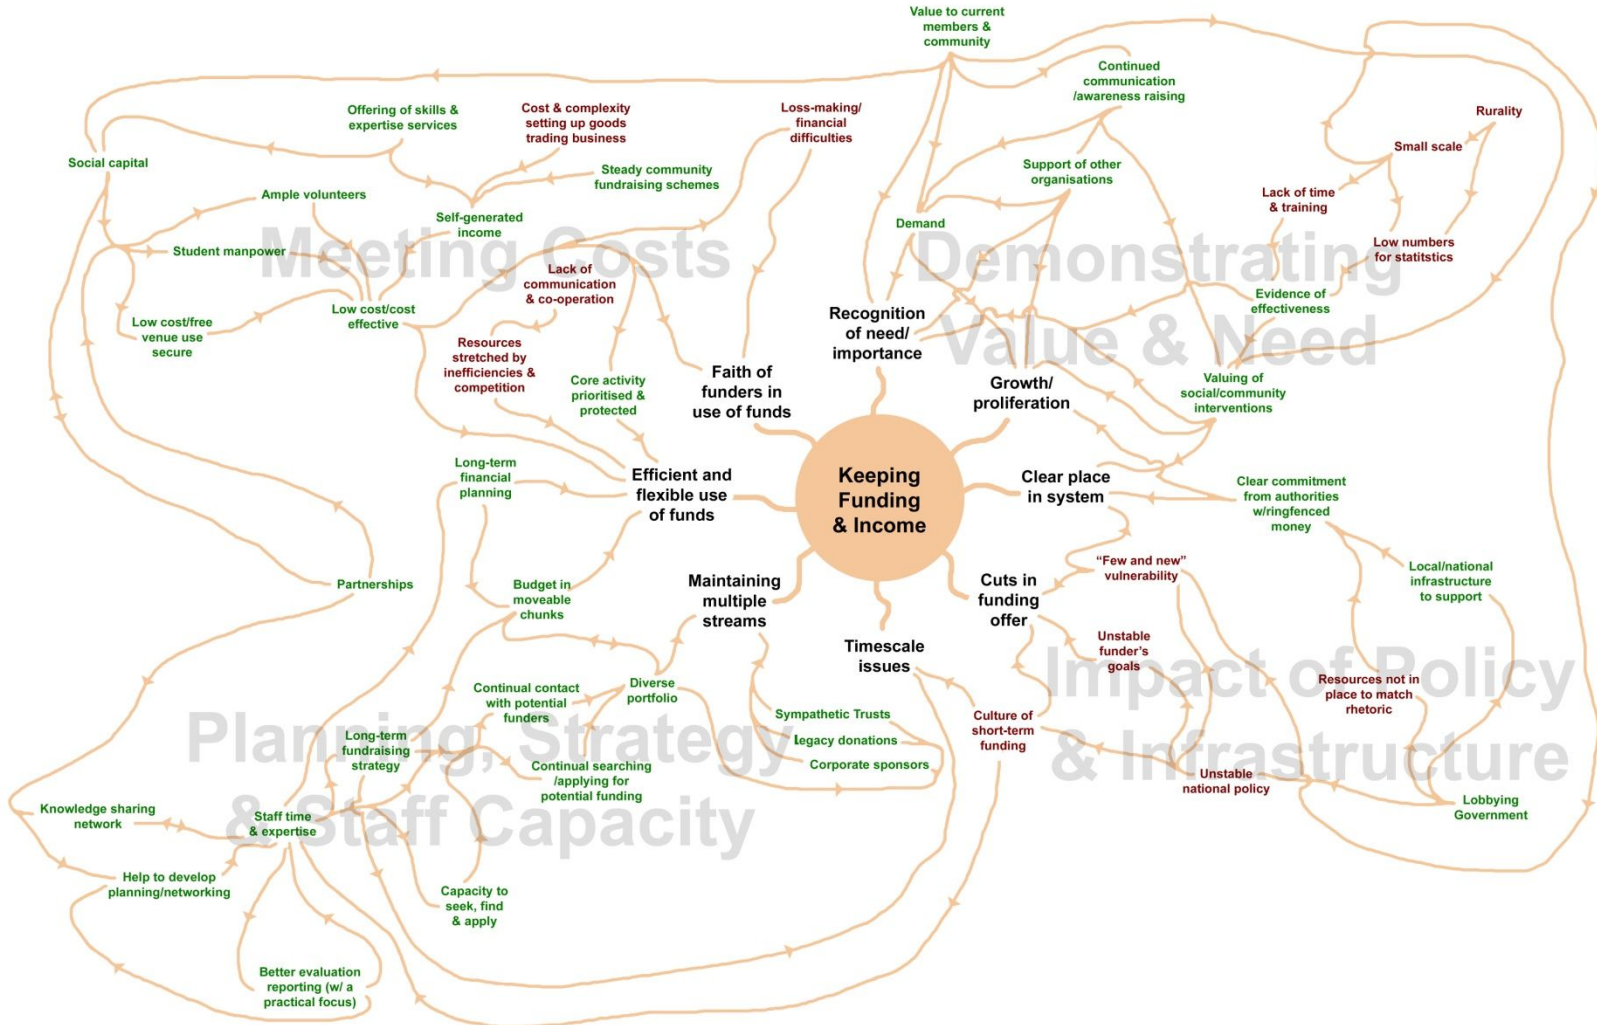

## Supplementary file 5: Full list of CMOCs

### Getting Members

CMOC 1: If the social aspect of an intervention is emphasised (C), then a wider range of people are likely to be interested (O), as a desire for social connection and activity is more universal than interest in a niche and potentially intimidating activity (M). [40,43,44,69,70,86,89,92]

CMOC 2: If food is offered (C), then people are more likely to attend (O), because the enjoyment of good food is universal and communal eating is associated with comfort, relaxation and social connection (M). [50,89]

CMOC 3: If facilitators are knowledgeable and empathetic, with good interpersonal skills (C), an initiative will be perceived as more welcoming and inclusive (O), as they will be better at understanding needs, engaging and building trust with potential members and their families (M). [36,47,61,73,89,94]

CMOC 4: If an initiative has an informal, unrushed and warm welcome on first visit (C), then people are more likely to want to return (O), as they are more likely to find the experience relaxing and enjoyable, not uncomfortable and intimidating (M). [42,51,84/85,89]

CMOC 5: If potential members have had poor previous experiences with groups or activities (dementia related or not) (C), they may not want to try another group or activity (O), because they think the experience will be similar and will want to avoid it (M). [47,74,82,94]

CMOC 6: If time is taken for personal contact, home visits or taster sessions with potential members (C), then people are more likely to come (O), as they will feel more familiar with the initiative and more trusting of those running it (M). [36,40,53,61,70,82]

CMOC 7: If an initiative is familiar and trusted, or local and well integrated with other organisations in the community (C), then people are more likely to come (O), as its links to familiar things that they trust will make it less intimidating (M). [40,42,46,47,57,65,71,75,88,94]

CMOC 8: If an intervention is based in familiar surroundings in, and open to, the community (C), then people are more likely to come (O), because potential members will find the normalcy, lack of stigma and chance for social integration appealing (M). [40,43,44,50,54,57,61,76,86,94]

CMOC 9: If a venue is dementia-friendly, comfortable and accessible (C), people are more likely to come (O), as they will not have concerns about comfort or access (M). [40,52,69,75]

CMOC 10: If an intervention is recommended by trusted family members and health professionals (C) people are more likely to go (O), as they will trust their judgement that it will be of benefit to them (M). [41,71]

CMOC 11: If discussion/training is held with families, carers and health professionals about their attitudes and beliefs towards dementia (C), they may be more likely to successfully encourage the person they care for to try an intervention (O), because they will understand dementia and be better able to overcome stigma and emotional barriers (M). [36,41,71,88]

CMOC 12: If evidence of an intervention's therapeutic benefits is made clear to families and care partners (C), then people are more likely to attend (O) as families and care partners will have confidence in the intervention so be more likely to encourage them to go (M). [61,80,92,94]

CMOC 13: If there is support for family/care partners alongside the intervention (C) then people are more likely to attend (O), as family and care partners will feel more able and inclined to attend themselves and encourage those they care for (M). [40,42,44,48,49,88,93]

CMOC 14: If an initiative is in a close-knit community with where there is stigma about dementia (C), then people and their families may be put off coming (O), as they may be concerned about confidentiality and word of their condition (or that of their family member) getting out (M). [77,82,86,88]

CMOC 15: If an initiative provides enjoyable, meaningful activities (C), then this is likely to attract members (O), as doing them will provide a reason and motive for many to attend initially, even if they stay on for other benefits (M). [55,64,69,70,78,83,84/85,91,94]

CMOC 16: If an initiative provides normalised, mainstream activities (C), then they are likely to attract members (O), as they will have resonance with people's previous interests, experience and history that would like to continue in some form (M). [40,41,43,44,59,74,78,83]

CMOC 17: If an initiative offers a range of different activities and services (C), then people are more likely to attend (O), as the initiative will appeal to a wider range of people with a range of needs (M). [40,67,82,86]

CMOC 18: If potential members' culture, ethnicity and language are acknowledged and catered for within the initiative (C), then they are more likely to come (O), as they will feel more comfortable and valued (M). [37,52,56,82,88]

CMOC 19: If there is a lack of diversity (of members and personnel) or pandering to stereotypes (C), then people may be put off coming (O), as they may have concerns about discrimination and stigma beyond dementia (M). [49,55,65,88]

CMOC 20: If the initiative is run by a religious organisation or in religious venue (C), then people may be put off coming (O), if they are not of that religion or cultural background (M). [60,88]

CMOC 21: If a group is too inclusive when not appropriate (C), this can alienate potential target members (O), as they will feel it will not be focussed on their specific needs (M). [47,54,86]

CMOC 22: If an initiative differentiates activities and roles for members by ability (C), then this can encourage potential members to attend (O), as they will feel there is an appropriate place for them rather than everyone being lumped in together (M). [40,93]

- 1  
2  
3 CMOC 23: If an intervention is risk averse or underestimates members' abilities and avoids challenge (C), then potential members will be  
4 put off (O), because they will see its activities as too easy, boring or not appropriate for them (M). [37,52,69,77]  
5  
6 CMOC 24: If an intervention is ability-focussed with tailored support and sensitive design of facilities (C), it is more likely to persuade  
7 potential members to attend (O) as they will be encouraged and supported to overcome physical impairments and negative attitudes (M).  
8 [37,44,51,69,86]  
9  
10 CMOC 25: When an intervention can offer practical advice, information and links to services that can help people (C), then it is more likely  
11 to attract members/service users (O), as they will be able to see that it has something to offer them that will meet their most immediate  
12 and pressing needs (M). [42,58,71,77,84/85]  
13  
14 CMOC 26: If safe, supported transfer from home to venue can be guaranteed (C), then people will be more likely to come (O), because  
15 they will be more likely to overcome any concerns about going out and getting to a group or activity session (M).  
16 [36,41,54,58,61,69,77,82,84/85]  
17  
18 CMOC 27: If the transport available isn't appropriate, reliable and respectful of people with dementia (C), then people will not come (O),  
19 as will not want to use that transport to get there (M). [47,48,49,53,60,69,82]  
20  
21 CMOC 28: If transport costs are significant and there is no financial support (C), then people will not come (O), as they will not be able to  
22 afford the transport costs (M). [36,48,50,60,61,69,80,88]  
23  
24 CMOC 29: If the venue is not in people's own neighbourhoods, is geographically distant or hard to reach (C) then people will not come (O),  
25 as they will find it difficult or intimidating to get there (M). [53,54,68,76]  
26  
27 CMOC 30: If an initiative forms links with community and public transport/taxi firms (C), then this will attract members (O), as they will  
28 find it less difficult or intimidating to travel to the venue (M). [40,48,49]  
29  
30 CMOC 31: If referrers are not made clearly aware of the added value, target population, ethos and activities of an intervention (C), then  
31 they will be less likely to refer appropriately (O), as they will not understand the value of it to their clients (M). [46,76,92,93,94]  
32  
33 CMOC 32: If there is constant contact and collaboration with potential referrers (C), then they are more likely to refer members (O), as  
34 they will build a relationship with the intervention that will mean they are better able to understand and remain alert to it (M).  
35 [46,71,74,75,90,92,93]  
36  
37 CMOC 33: If PR materials are not available in the right places or presented to people in the right circumstances (C), then they will not try  
38 an intervention (O), because they will not access those materials to find out about an intervention's potential value to them (M).  
39 [36,60,80,82,88]  
40  
41 CMOC 34: If PR materials are not in an understandable and appropriate format and tone (C), then people will not try an intervention (O),  
42 as they will find the materials too off-putting to engage with (M). [53,56,61,76,77,83,88,90]  
43  
44 CMOC 35: If PR materials do not make clear the specifics of an intervention, what to expect and how to attend (C), then people will be less  
45 likely to come (O), as they may be anxious due to uncertainties over what they will have to do and its value to them (M). [40,46,79,88,94]  
46  
47 CMOC 36: If an intervention has a stigma-free name that resonates with its target population (C), then people are more likely to come (O),  
48 as they will have confidence that they will be treated with respect and not suffer stigma when they go. [45,50,61,74,88,91]  
49  
50 CMOC 37: If the local community is fragmented with no local welfare organisation to distribute information (C), then people will be less  
51 likely to come (O), as it will be more difficult to get the word out to the right people in the community (M). [47,76,88]  
52  
53 CMOC 38: If in intervention forms links with existing groups, organisations and venues serving same demographic (C), then people will be  
54 more likely to come (O), as information and marketing materials will be more likely to reach them. [40,64,71,83,86]  
55  
56 CMOC 39: If all those involved in a person's care work together to collate and co-ordinate information (C), then people will be more likely  
57 to come (O) as information and marketing materials will reach them more efficiently (M). [36,76]  
58  
59 CMOC 40: If there is a dedicated linking, contact or health care adviser service (C) then people will be more likely to come (O) as  
60 information and marketing materials will reach them more efficiently. [36,56,61,72,82,84/85,88,92]  
61  
62 CMOC 41: If awareness of the needs of people dementia and of how an intervention can meet them is raised in the community in general  
63 (C), then people will be more likely to come (O), as stigma will be reduced and the value of the intervention communicated through word  
64 of mouth. [36,40,46,47,50,55,61,62,64,67,71,74,82,83,88]  
65  
66 CMOC 42: If GPs were given more incentive and guidance for social prescribing (C), then they would refer more people (O), because they  
67 would have a vested interest and confidence in doing so (M). [37,82]  
68  
69 CMOC 43: If there are significant bureaucratic problems with referring (such as chronic waiting lists, area border issues or the need for  
70 signed consent) (C), then professionals will be less likely to refer (O), as they will anticipate difficulties that will thwart their attempt to  
71 refer (M). [56,72,76,82]  
72  
73 CMOC 44: If GPs do not diagnose dementia until people are at later stages (C), then they will not refer people to community initiatives (O),  
74 as they will not see initiatives targeted towards those at earlier stages still able to live at home as appropriate for those they are  
75 diagnosing (M). [48,93]  
76  
77 CMOC 45: If an intervention waives the need for a diagnosis and accepts self-diagnosis (C), more people will come (O), as this will  
78 encourage a wider range of potential members and avoid excluding people who might benefit. [43,61,64,93]  
79  
80 CMOC 46: If an initiative's membership application process is not simple, clear, concise and easy (C), then people will not come (O), as the  
81 difficulty in applying will put them off joining. [61,84/85,90]

## **Keeping Members**

CMOC 47: If there is group cohesion and mutual trust between members (C), then a group is more likely to sustain (O), because members will feel more solidarity and investment in the group. [41]

CMOC 48: If friendships between members are encouraged, recognised and supported by staff and activities (C), then people are likely to keep coming (O), as they will feel more supported, comfortable and engaged, and able to support each other (M). [45,51,71,83,95]

CMOC 49: If an intervention is too focussed on agendas, rules and expectations (C), then people may stop coming (O), because they feel pressured, restricted and unable to relax and enjoy the social and emotional benefits important to them. [37,52,55,78,83,84/85]

CMOC 50: If the pace of activity through the day/session is too fast and strict (C), then people may stop coming (O), because they will struggle to stay engaged and will not enjoy themselves (M). [40,43,51,76,91]

CMOC 51: If ample informal time is made for socialising, peer support and feedback (C), then members are more likely to keep coming (O), as they will be more likely to feel comfortable and supported. [37,40,41,44,51,55,70,77,78,83,86,89,90,91,92]

CMOC 52: If there is opportunity to have communal eating and relaxing in a “cozy” environment (C), then members are more likely to keep coming (O), as this will provide comfort and foster group cohesion. [41,89]

CMOC 53: If there is regular social integration with others outside of the group (C), then members are more likely to keep coming (O), as they will feel more connected and less stigmatised (M). [40,45,50,53,57,61,71,76,82,86,94]

CMOC 54: If activities are mainstream and involve others without dementia (e.g. family/carers or locals from the community) (C), then members are more likely to keep coming (O), as they will feel activities are more normalised, reducing stigma and increasing enjoyment (M). [40,43,47,48,71,74,76,82]

CMOC 55: If an intervention is treated as a “dementia free zone” where talk is not about a person’s condition or medical issues (unless they want to raise them) (C), then people are more likely to keep coming (O), as they will find the environment more normalising and less stigmatising (M). [44,78]

CMOC 56: If an initiative contains projects which enable members to contribute to helping others in the community (C), then people are more likely to keep coming (O), because they will feel valued, useful and empowered (M). [82,83]

CMOC 57: If an initiative has links to existing mainstream public amenities (C), then people are more likely to keep coming (O), as they will recognise it gives them access to wider networks of support and friendship (M). [39]

CMOC 58: If members are involved in group decision-making and setting expectations (C), then people are more likely to keep coming (O), because they will feel ownership and investment in the group and confidence that the group is tailored towards their needs (M). [41,45,51,57,67,78,90]

CMOC 59: If regular feedback meetings are held to “tune” an intervention to the wants and needs of members (C), then people are more likely to keep coming (O), as activities will be kept appropriate and evolve to suit the membership (M). [40,63,75,83,84/85,94]

CMOC 60: If individuals are allowed to make their own decisions about what they do or don’t do during a session (C), then they will be more likely to keep coming (O), as they will feel their independence and freedom is respected and their voice heard (M). [36,51,52,63,89]

CMOC 61: If staff treat people respectfully as equals and relate personally (C), then people are more likely to keep coming (O), because they will feel staff and the group as a whole understands them and their needs (M). [41,42,52,74,84/85,89]

CMOC 62: If strategies are planned to review individual progress and involvement (C), then people are more likely to keep coming (O), as they are more likely to remain engaged and feel part of the group as a whole (M). [50,51,90]

CMOC 63: If personnel listen to and act upon regular input from family and caregivers (C), then people are more likely to keep coming (O), as they will appreciate the increased personalisation and sensitivity to their needs (M). [50,52,63,76,94]

CMOC 64: If an initiative does not pay attention to the needs of family and care partners (C), then people are less likely to keep coming (O), because there may be unaddressed logistical difficulties for the family or carers such as fit with work or transport issues (M). [54,61,71,76,77,80,82,84/85]

CMOC 65: If an initiative can open for more hours and help arrange transport (C), then people are more likely to come (O), as this will take the pressure off family members and carers to be flexible and arrange things, and bypass logistical difficulties (M). [40,43,53,70,80,84/85]

CMOC 66: If members who are no longer the target for the intervention stay on because there is no exit strategy or onward service capacity (C), then this can discourage target members from continuing to attend (O), as they may feel the service is too stretched to meet their needs (M). [51,76,94]

CMOC 67: If an initiative does not cater equally both for new members and older members whose condition has progressed (C), then this can discourage one group or the other from continuing to attend (O), as they will feel the initiative is more focussed upon the other group hence not appropriate for them (M). [45,78,92]

CMOC 68: If a group or activity is not matched with members’ interests and ability (C), then members may stop attending (O), as they will feel it is not appropriate for them or meeting their needs (M). [40,53,74,80]

CMOC 69: If activities involve a degree of challenge or learning (C), then members may be more likely to keep coming (O), as they will feel empowered and have a sense of achievement (M). [44,47,48,78,82,83]



1  
2  
3 CMOC 70: If an intervention pre-assesses members and plans strategies to meet their individual needs (C), then members are more likely  
4 to keep coming (O), because activities and support will be more likely to be appropriate for them (M). [43,50,51,54,84/85,90]

5 CMOC 71: If a venue is comfortable, familiar and stable, with adequate space and facilities (C), then people are more likely to keep coming  
6 (O), as they will feel relaxed, secure and at home there (M). [40,51,52,75]

7 CMOC 72: If a venue has multiple spaces within it (C), then people are more likely to feel comfortable there (O), as they will be able to  
8 move around and have a choice of activities, environments, social sub-groups or levels of involvement in activity (M). [52,79]

9 CMOC 73: If sessions are regular, routine and structured (C), then members will be more likely to keep coming (O), as they will feel  
10 comfortable and secure in the familiarity and reliability of proceedings (M). [40,41,51,61,77,82,89,91,92]

11 CMOC 74: If the venue and timings remain reliably the same (C) then members are more likely to keep coming (O), as it will become part  
12 of their routine (M). [40,51]

13 CMOC 75: If there is no continuity of staff or not enough staff to ensure reliable provision (C), then members may be less likely to keep  
14 coming (O), as they will find it difficult to have confidence and build trust in the intervention and its staff (M). [36,45,82]

15 CMOC 76: If an intervention works to a tried and tested model (C), then members are more likely to feel secure (O), as that model will  
16 provide a structure that works (M). [76]

17 CMOC 77: If there are not new ideas and some variety planned across the calendar (C), then members may stop coming (O), because they  
18 may feel the group/activities have become stale and boring (M). [47,51,83]

### 21 **Getting Staff and Volunteers**

22  
23 CMOC 78: If an initiative engages in community outreach such as talks and training with other groups and at events (C), then this will help  
24 attract volunteers (O), because the initiative's profile will be raised with wide range of stakeholders in the community (M). [50,64,74]

25 CMOC 79: If awareness is raised in the community about the activities and benefits of a what an initiative does (C), then it will be more  
26 likely to attract appropriate personnel (O), as potential staff and volunteers will understand its value to service users and what they can do  
27 to help (M). [63,76,79,88]

28 CMOC 80: If an initiative has links with like-minded groups (C), then they may get help finding and training staff volunteers (O), as they will  
29 be able to share ideas and practice on what is successful (M). [63,70]

30 CMOC 81: If an initiative approaches established community organisations and authorities (third sector, faith or local authority) (C), they  
31 are more likely to get help with finding volunteers (O), as these organisations are likely to have access to an existing volunteer workforce  
32 or contacts that could help (M). [37,49]

33 CMOC 82: If an initiative has links with professional, third sector or educational bodies (C), they may help with creating a more skilled  
34 workforce (O), because they may have the remit provide training for staff and volunteers (M). [56,67]

35 CMOC 83: If an initiative is hosted by a public venue or local club (C), this may help with staffing (O), as the venue or club may have  
36 existing staff who can help with running things (M). [37,40,44,83]

37 CMOC 84: If a community has an educational establishment running a health and social-care course (C), this could be a source of  
38 volunteers (O), as students/trainees will have the drive and interest to work with social-care-related activities to gain experience (M).  
39 [38,41,63,66,86]

40 CMOC 85: If a formal partnership is agreed with an educational establishment (C), this will guarantee regular volunteers during term time  
41 (O), as work placements can be formalised as part of students' courses (M). [38,41,66]

42 CMOC 86: If the initiative is in a rural area (C), then it can be more difficult to recruit volunteers (O), as there may be no educational  
43 establishment or body of students/trainees to recruit from (M). [64,65]

44 CMOC 87: If the initiative is in a rural area (C), then it may take more time to recruit volunteers (O), as familiarity and personal contacts  
45 tend to be more important in small, close-knit communities (M). [64]

46 CMOC 88: If the initiative is in a rural area (C), then it may be more difficult to recruit staff and volunteers (O), as they may not live  
47 geographically near members or the venue, presenting extra logistical challenges (M). [64,65]

48 CMOC 89: If a community has a population of active retirees (C), this could be a source of volunteers (O), as they are likely to have time  
49 and experience conducive to volunteer work with older people (M). [88]

50 CMOC 90: If there are friends and family of current or previous members/service users that are available (C), this could be a source of  
51 volunteers (O), as they will understand the value of the intervention and already be invested in it (M). [59,88]

52 CMOC 91: If there are no specialist elements to the intervention or members with high care needs (C), then personnel do not need to have  
53 professional training or expertise (O), as they will still be able to understand and deliver the intervention for the benefit for service users  
54 (M). [44,91]

55 CMOC 92: If an intervention has more than one skilled facilitator (C), then it can benefit more members (O), as the workload can be split  
56 and more one-on-one support for members offered (M). [77,78,92]

57 CMOC 93: If an initiative's leaders/co-ordinators have good communication and interpersonal skills (C), then it is more likely to be  
58 successful (O), as they will engage and inspire other staff and volunteers (M). [46,61,76,93]

CMOC 94: If volunteers' availability and interpersonal skills are inconsistent (C), an initiative is less likely to be successful (O), as it will not have a reliable workforce to run it (M). [77]

CMOC 95: If funded support worker roles exist (C), then a reliable volunteer workforce is more likely (O), because they can help build a volunteer base (M). [70]

### **Keeping Staff and Volunteers**

CMOC 96: If personnel are flexible and open to new ways of working (C), then they are more likely to work effectively (O), as they will be more likely to collaborate with others, sharing knowledge, experience, innovation, resources and effective working practices (M). [50,54,66,93]

CMOC 97: If personnel have advice or training to boost communication and collaboration skills (C), then they are more likely to work effectively (O), as they will be more able to share knowledge, experience, innovation, resources and effective working practices (both internally and externally) (M). [48,54]

CMOC 98: If personnel are driven and able to deal with stress (C), then they are more likely to continue (O), as they will be able to overcome the challenges and demands of running an intervention (M). [76]

CMOC 99: If facilitators are not able to take time for self-care (C), then they will burn out (O), as running an intervention can be challenging and emotionally demanding (M). [51,92]

CMOC 100: If time is taken to plan strategies for recruitment, training, support, retention and balance of personnel at the start (C), then personnel problems and burn out can be avoided (O), as planners will have thought through the challenges involved and put in place actions to tackle them (M). [55,90]

CMOC 101: If personnel have access to experienced tips and guidance (from materials or individuals) throughout an intervention's start-up period (C), they are more likely to continue (O), as they will be better informed to resolve problems and avoid common pitfalls (M). [47,88]

CMOC 102: If there is an ethos of inclusion, community, camaraderie and helping people (C), then personnel will be more likely to continue (O), as they will feel enjoyment and benefit from this ethos along with members/service users (M). [44,57,92]

CMOC 103: If there are a range of roles and levels of involvement for volunteers (C), they are more likely to be satisfied with volunteering (O), as they can do something that suits them and their abilities that they are comfortable with and interested in (M). [67]

CMOC 104: If volunteers are included in professional activities and training (C), they are more likely to be satisfied with volunteering (O), as they will feel their skills and development are valued by the initiative (M). [61]

CMOC 105: If there is limited and inconsistent funding (C), then an intervention is less likely to be able to retain paid staff (O), because their jobs and the long-term future of the intervention will not be secure (M). [67,77,93]

CMOC 106: If personnel roles are not secure (C), then an initiative is less likely to sustain (O), because turnover will be high and key individuals with key experience and contacts will be lost (M). [67,83,93]

CMOC 107: If volunteers are seen by authorities and commissioners as "coming for free" (C), then they are less likely to continue (O), as they will feel un-valued with their time and expertise taken for granted (M). [62]

CMOC 108: If unpaid volunteers are treated as a replacement for professional staff (C), then staff are less likely to continue (O), as they will feel their roles are undermined and un-valued (M). [46]

CMOC 109: If financial assistance is made available for volunteer groups (C), then they are more likely to continue (O), as they will have the resources and support to run more activities (M). [70]

### **Getting Support of Other Organisations**

CMOC 110: If there is a higher public awareness and profile for people living with dementia (C), then dementia-targeted interventions are more likely to get support from other organisations, services and amenities (O), because there will be more recognition of their importance for society in general (M). [39,67,73]

CMOC 111: If the added value of an intervention is made clear to other organisations (C), then it is more likely to get support and find a place in the local care offer (O), because other organisations will understand it's value to their members/service users (M). [42,68,70,71,75,76,92,93,94]

CMOC 112: If an intervention engages with research and evaluation to gather evidence of benefits (C), then it is more likely to get support (O), because the resulting reports will lend it legitimacy in the eyes of other organisations (M). [47,55,56]

CMOC 113: If it is made clear that an intervention is based upon a strong evidence-based model (C), then it is more likely to get support (O), because that model will lend it legitimacy in the eyes of other organisations (M). [68,93,94]

CMOC 114: If an intervention involves the local community in its steering (C), then it likely to attract further community support (O), as key people and organisations in the community with wider links will feel a sense of ownership and investment (M). [67]

CMOC 115: When there are a range of organisations (e.g. local authority, third sector, faith, business and education) active in the community (C), they may be willing to offer support if asked (O), as they may have a remit to share resources such as venue space and facilities, equipment, training, staff, volunteers or contacts (M). [37,38,40,41,44,49,56,57,66,83,86]

1  
2  
3 CMOC 116: If an intervention model is flexible (C), then it has a better chance of finding support (O), as it can accommodate being run at a  
4 range of venue types in, a range of ways, by a range of host organisations (M). [37,78,91,92]

5 CMOC 117: If an existing social care business is approached (C), they may support, host or partner an intervention (O), as it may help them  
6 attract clients/customers (M). [92]

7 CMOC 118: If training and guidance is available from a public or third sector authority (C), this may help gain further support (O), as it will  
8 help an intervention develop its skills and expertise in marketing, networking and outreach (M). [74]

9 CMOC 119: If an intervention is based in a civic centre or public venue (C), then it is more likely to get support from other local  
10 organisations (O), because it will be visible to others sharing that space (M). [50,93]

11 CMOC 120: If an intervention focuses on building links with local organisations and services (C), it is more likely to get support (O), as it is  
12 easier to bring together a network of those who are already invested in the same community and some links will already exist (M).  
13 [42,86,94]

14 CMOC 121: If an intervention is run at a public venue or local club (C), then links with others in the community are easier to forge (O), as  
15 there will be an existing network of venue/club users and contacts that the intervention can access (M). [40,44,86,94]

16 CMOC 122: If a group or activity is small scale (C), then it can hard to get support (O), as it is more difficult for them to network with larger  
17 organisations, authorities, movers and shakers (M). [49]

18 CMOC 123: If struggling groups in the same area merge (C), they can support each other (O), because they can pool resources, personnel,  
19 knowledge and ideas (M). [83]

20 CMOC 124: If links are forged with a national network of similar interventions (C) then they can support each other (O), because they can  
21 pool resources, knowledge, contacts and strategy (M). [42]

22 CMOC 125: If a locality has other organisations working with the same target population (C), then in intervention may struggle to get  
23 support (O), as those other organisations and their supporters may perceive the intervention as competition (M). [93,94]

24 CMOC 126: If an intervention has a clear place in the local offer without service/role overlap (C), then it is more likely to get the support of  
25 others (O), because they will see it as complimenting their service not competing with it (M). [42,46]

26 CMOC 127: If other organisations are informed, invited to meetings and asked for help and advice early on (C), then an intervention is  
27 more likely to get the support (O), because they will feel respected and invested in the success of the new intervention (M). [46,67,76,93]

28 CMOC 128: If groups involve professionals already working with individual members (e.g. case workers, carers) in activities (C) then they  
29 are more likely to increase support from professional services (O), because professionals will understand the value of the intervention to  
30 their service-users and feel invested in its success (M). [93]

31 CMOC 129: If an intervention acts as a hub for/gate/link to other services and is tuned to dovetail with them (C), then it is more likely to  
32 get the support of those services (O), because they will see the intervention as being of help to them (M). [42,54,68,72,76,91]

33 CMOC 130: If an intervention offers a benefit or resource to the wider community (C), then it is more likely to get the support of other  
34 community organisations (O), as they will see it as benefiting their members/service users (M). [55,74,83,94]

35 CMOC 131: If an intervention offers to do reciprocal work, sharing knowledge and resources with other organisations (C), then it is more  
36 likely to get their support (O), as they will see the benefit to working together (M). [55,74,83,94]

37 CMOC 132: If there is a disjoin between national policy and local need (C), then initiatives can struggle to get and keep support (O),  
38 because by adhering to one they will neglect the other, alienating would-be supporters (M). [46]

39 CMOC 133: If there were ring-fenced funding to support dementia-targeted community initiatives as part of national policy (C), then small,  
40 local initiatives would get support (O), as there would be incentives for health services and LAs to help them (M). [37,50,73]

41 CMOC 134: If health and social care authorities commissioned services to work with community initiatives (C), then small, local initiatives  
42 would get support (O), because it would ensure the collaboration of services and organisations at different levels (M). [49,70,82]

43 CMOC 135: If health pathways were developed around existing social networks (C), then small, local initiatives would get support (O), as it  
44 would encourage more community collaboration and co-production with health services (M). [82]

45 CMOC 136: When national and official organisations take the lead in working with small, local initiatives (C), this helps more consistent  
46 provision of local services across regions (O), because there is more joined-up strategic direction of what is on offer and available (M).  
47 [70,73]

48 CMOC 137: When national and official organisations show support for the involvement of private sector partners (C), then small, local  
49 initiatives are more likely to get support (O), as it provides private sector organisations with the incentive, tools and guidance to work in  
50 partnership (M). [73]

### 51 **Keeping Support of Other Organisations**

52 CMOC 138: If communication is not maintained (C), then support of others can drop away (O), as interest and enthusiasm may dwindle in  
53 tandem with an intervention's contact and visibility to its collaborators (M). [75,94]

54 CMOC 139: If information sharing and knowledge transfer is not maintained (C), then support of others can drop away (O), as  
55 communication and administration problems may arise between collaborating parties (M). [49,84/85]

1  
2  
3 CMOC 140: If there is a designated person with responsibility for regular and consistent communication with other organisations (C), then  
4 continued support is more likely (O), as they will have the time to pay attention to maintaining collaborative working, and build experience  
5 and relationships with key people in doing so (M). [70,94]

6 CMOC 141: If relationships with key people in other organisations are maintained (C), then support of those organisations is more likely to  
7 continue (O), as an intervention will create “champions” within those organisations (M). [46,73]

8 CMOC 142: If staff turnover (internal and external) is high (C), then support can be lost (O), because communication and relationships with  
9 contacts and “champions” can suffer due to the loss of key personnel (M). [67,83,93]

10 CMOC 143: If there is a difference in culture between collaborating organisations (C), then effective support can be hindered (O), as  
11 personnel from each organisation will not be working with the same focus and goals (M). [46,93,94]

12 CMOC 144: If groups or sectors have a negative or competitive attitude towards each other (C), then effective support can be hindered  
13 (O), as it creates problems sharing data, learning and resources (M). [48,49,94]

14 CMOC 145: If an intervention makes effort to learn about and embed in the life of a supporting organisations (C), then it is more likely to  
15 maintain support (O), as it will understand that host organisation better and share the same goals (M). [55]

16 CMOC 146: If staff (internal and external) are experienced in working collaboratively (C), then an intervention is more likely to maintain  
17 support (O), as staff will be more skilled, flexible and understanding when working with those from another organisation (M). [93]

18 CMOC 147: If independent advice on communication (internal and external) and collaboration is available (C), then an intervention is more  
19 likely to maintain support (O), as leaders, staff and volunteers will become more skilled at networking and working together while  
20 overcoming differences in culture (M). [54,93]

21 CMOC 148: If there are multiple forms of strong inter-professional leadership (C), then collaboration is likely to be more successful (O),  
22 because there will be mutual learning with leaders setting an example for others to follow (M). [46,50,68,93]

23 CMOC 149: If time is taken to plan well early on (C), then support from others is more likely to be maintained (O), as personnel will have  
24 thought through the challenges involved in maintaining energy and enthusiasm and put in place actions to tackle them (M). [55]

25 CMOC 150: If there is a steering group including outside organisations (C), then support is more likely to be maintained (O), as steering will  
26 include a focus on shared agenda and complementarity with outside organisations (M). [46]

27 CMOC 151: If a partnership is not equal and collaborating at all stages, from planning to practice (C), then this could hinder support (O), as  
28 one party may feel the other is not contributing what it should while the other feels dictated to, creating friction (M). [84/85]

29 CMOC 152: If a collaboration protocol with supporting organisations is drafted and discussions logged and reviewed (C), then support is  
30 more likely to be maintained (O), because all parties will have the chance air and resolve issues and have clarity over expectations and  
31 mutual goals (M). [55,76,84/85,94]

### 32 **Getting Funding and Income**

33 CMOC 153: If potential funders are not clear on what a service/intervention is and does (C), then they will be less likely to fund it (O),  
34 because they do not understand its purpose or value (M). [79]

35 CMOC 154: If potential funders are made aware of the added value and benefit of an intervention (C), then they will be more likely to fund  
36 it (O), because they will recognise it has something uniquely valuable to offer service users (M). [55,76]

37 CMOC 155: If communication and publicity is regularly disseminated to potential funders (C), then they are more likely to fund in the  
38 future (O), as they will be familiar with and alert to the work of an intervention (M). [81]

39 CMOC 156: If recognised and standardised materials (e.g. Alzheimer’s Society materials, PQASSO or Social Return on Investment  
40 evaluation) are used to gather and communicate evidence of worth (C) then funders are more likely to fund (O) as they will see that  
41 evidence as more legitimate than anecdotal accounts (M). [56]

42 CMOC 157: If potential funders are made aware of links with and support from other organisations (C), then they’re more likely to fund (O)  
43 because they are likely to view the support of others as adding legitimacy to a community initiative (M). [55]

44 CMOC 158: If corporate organisations are made aware of how an intervention aligns with its aims (C), then they will be more likely to  
45 sponsor or donate (O), as they will feel supporting that intervention helps progress their goals (M). [81]

46 CMOC 159: If an intervention develops its skill in networking and communicating with other organisations (C), then it is more likely to find  
47 funding (O), as it will learn of funding opportunities through a wider network of support and contacts (M). [74]

48 CMOC 160: If awareness of the wants and needs of people with dementia is raised in society in general (C), then funders are more likely to  
49 support a dementia-targeted initiative (O), as they are more likely to recognise that it meets the needs of service-users (M). [73,74]

50 CMOC 161: If there is demand for an intervention from service users and referrers (C), then funders are more likely to fund (O), as they will  
51 recognise that it is meeting people’s needs (M). [74]

52 CMOC 162: If potential members/service users are not clear on what a service/intervention is and does (C), then they will be less likely to  
53 try it (O), because they do not understand it’s purpose or value to them (M). [46,79,88,94]

54 CMOC 163: If potential referrers are not clear on what a service/intervention is and does (C), then they will not refer people to it (O),  
55 because they do not understand it’s purpose or value to their service users (M). [46,76,92,93,94]



- 1  
2  
3 CMOC 164: If an intervention is perceived as more expensive than alternatives on offer without offering significant added value (C), funders will be less likely to fund (O), as they will not see it as value for money (M). [56,62,93,96]  
4  
5 CMOC 165: If an initiative is perceived as having financial difficulties (C), potential funders are less likely to fund (O), as they will see it as a high risk funding decision (M). [76,88]  
6  
7 CMOC 166: If an initiative has co-operative working arrangements with other community organisations (C), then this can help keep costs low (O), as they can agree to share resources (venue, personnel, equipment, training etc.) (M). [48,55,56,66,80,92]  
8  
9 CMOC 167: If an initiative can generate some income through offeringservices to others(C), then funders are more likely to have confidence in it (O), as they will perceive it be to more viable (M). [81]  
10  
11 CMOC 168: If funders are made aware of the support from other organisations for a new initiative (C), they are more likely to fund (O), as they will perceive the initiative as being more viable due to that support (M). [55]  
12  
13 CMOC 169: If initiative can act as a gate/link for other services and community organisations (C), then it is more likely to get funding (O), as it will be seen as of value to enhancing existing services and organisations (M). [54,76]  
14  
15 CMOC 170: If intervention personnel have good, up-to-date knowledge of funding processes and policy (C), they are more likely to get funding (O), because they will understand how to plan and implement an effective strategy to seek and find it (M). [68,75,76]  
16  
17 CMOC 171: If like-minded groups share successful ideas (C), they are more likely to find funding solutions (O), because they will be able to learn from each other about what works or doesn't work (M). [56,63]  
18  
19 CMOC 172: If interventions include more practical detail on resources, costs and funding as part of standard reporting/evaluation (C), then others in the future will be more likely to find funding solutions (O), as they can learn from the experience of others about what works or doesn't work (M). [47]  
20  
21 CMOC 173: If authoritative help is available to develop personnel's expertise regarding business planning and networking (C), then an intervention is more likely to find funding solutions (O), because personnel will be better at developing and implementing a strategy to do so (M). [74]  
22  
23 CMOC 174: If an intervention has a realistic strategy to attract donations and grants (C), then it is more likely to find funding solutions (O), as personnel will have thought through the challenges involved and put in place actions to tackle them(M). [81]  
24  
25 CMOC 175: If an intervention has a business case ready (C), then it is more likely to secure funding (O), as it will be able to respond quickly when a window of opportunity opens with a potential funder (M). [54]  
26  
27 CMOC 176: When an initiative is in a more rural area (C), it is likely to be small scale with fewer members/service users (O), because the population is geographically diffuse without the infrastructure to gather together easily (M). [67]  
28  
29 CMOC 177: If an initiative is small-scale (C), it will not be able to robustly demonstrate demand, effectiveness and H&SC savings (O), because it's number or members/service users will not be enough to capture robust evidential statistics (M). [67]  
30  
31 CMOC 178: If funders demand robust statistical evidence before funding (C), then small and rural groups and activities will be disadvantaged (O), because they will not have the numbers and resources to produce this (M). [63,67,70]  
32  
33 CMOC 179: If an initiative is small-scale (C), it will be disadvantaged in securing funding (O), as it will have fewer personnel with more limited time and resources to continually apply (M). [67]  
34  
35 CMOC 180: If an intervention is aligned with national agenda (C), then it is more likely to get funding (O), because the policy and infrastructure will be in place to support it (M). [42,50,67,75]  
36  
37 CMOC 181: If national policy is not consistent with local need (C), then local groups serving those needs will struggle to attract funding (O), as funders will not see their cause as a priority (M). [46,67,94]  
38  
39 CMOC 182: If the national (and by extension funders') agenda focuses on medical needs and costs over social and emotional needs (C), then community-focussed groups and activities will struggle to get funding (O), as funders will not understand their benefits or see their cause as a priority (M). [49,56,63,68,96]  
40  
41 CMOC 183: If intervention providers, service users and families speak out about their needs (C), providers may be more likely to get funding for local community-focussed services (O), as authorities will feel pressure to change the national agenda to meet people's needs (M). [87]  
42  
43 CMOC 184: If resources are not allotted and ring-fenced to match changes in national or local policy (C), there will be no benefit to community interventions (O), as funders will not have the resources to invest in making a difference in practice (M). [48,62,70,73]  
44  
45  
46  
47  
48  
49  
50  
51  
52  
53

### **Keeping Funding and Income**

- 54 CMOC 185: If communication and publicity is regularly disseminated to funders (C), then they are more likely to fund again in the future (O), as they will be kept informed and alert to the continuing work and benefits of an intervention (M). [81]  
55  
56 CMOC 186: If publicity and networking is pared back to cut costs (C), this could negatively impact changes of finding continued funding (O), as an intervention will drop off funders' "radar" and risk being forgotten or overlooked (M). [81]  
57  
58 CMOC 187: If funders are made aware of a growth in demand for an intervention from service users and referrers (C), then they are more likely to continue to fund (O), as they will recognise that it is meeting people's needs (M). [74,75]  
59  
60

1  
2  
3 CMOC 188: If funders are made aware of accruing evidence of the added value and benefit of an intervention (C), then they will be more  
4 likely to fund it (O), because they will recognise it has something uniquely valuable to offer service users (M). [55,76]

5 CMOC 189: If groups and organisations do not communicate and work together (C), then existing funds will not go as far (O), as available  
6 financial resources will be split and lost on inefficiencies and duplication of services (M). [48]

7 CMOC 190: If an initiative has co-operative working arrangements with other community organisations (C), then this can help keep costs  
8 low (O), as they can agree to share resources (venue, personnel, equipment, training etc.) (M). [48,55,56,66,80,92]

9 CMOC 191: If an initiative has multiple and diverse income streams (C), then it is more likely to maintain a proportion funding (O), because  
10 if one stream stops, others will still be available. [55,56,67]

11 CMOC 192: If an initiative's budget is broken down into identified parts (C), then it is more likely to be able to weather changes in funding  
12 (O), as what can be used to pay for what is more flexible, and core activity can be prioritised (M). [55,67,81]

13 CMOC 193: If financial planning is done with a focus on the long-term (C), then an initiative is more likely to weather changes in funding  
14 (O), as it will be able to spread existing funds more effectively by allotting spending carefully (M). [55,84/85]

15 CMOC 194: If an intervention has a realistic strategy to continually attract donations and grants (C), then it is more likely to find funding  
16 solutions (O), as personnel will have thought through the challenges involved and put in place actions to tackle them (M). [81]

17 CMOC 195: If there is no long-term funding available (C), this will place significant demands on the time and resources of personnel (O),  
18 because they will need to continually seek and apply for fresh funding (M). [67]

19 CMOC 196: If an initiative is small-scale (C), it will be disadvantaged in continuing to secure funding (O), as it will have fewer personnel  
20 with more limited time and resources to continually seek and apply (M). [67]

21 CMOC 197: If an initiative continually and systematically seeks new income streams (C), then it is more likely to maintain a proportion  
22 funding (O), because if one stream stops, it will be more likely to have multiple other streams available (M). [55,67,56]

23 CMOC 198: If funders objectives are always short-term and keep changing (C), then deep learning on what works for services users and  
24 communities will be lost (O), as "quick win" projects will be encouraged over support for existing and experienced initiatives (M). [46,93]

25 CMOC 199: If funders only support short-term or new projects (C), then initiatives will struggle to become established long-term (O), as  
26 they will be unable to plan ahead with confidence or have time to learn how activity can be supported sustainably (M). [49,62,68]

27 CMOC 200: If resources are not allotted and ring-fenced to match changes in national or local policy (C), there will be no benefit to  
28 community interventions (O), as funders will not have the resources to invest in making a difference in practice (M). [48,62,70,73]

29 CMOC 201: If intervention providers, service users and families speak out about their needs (C), providers may be more likely to get  
30 funding for local community-focussed services (O), as authorities will feel pressure to change the national agenda to meet people's needs  
31 (M). [87]

## RAMESES publication standards (realist synthesis) checklist

(After BMC Medicine 2013, 11:21 <http://www.biomedcentral.com/1741-7015/11/21>)

| Items required when reporting a realist synthesis |                                       |                                                                                                                                                                                                                                                                                                                                                                                                                                                                                                                                                           | Reported on page(s) |
|---------------------------------------------------|---------------------------------------|-----------------------------------------------------------------------------------------------------------------------------------------------------------------------------------------------------------------------------------------------------------------------------------------------------------------------------------------------------------------------------------------------------------------------------------------------------------------------------------------------------------------------------------------------------------|---------------------|
| 1                                                 |                                       | In the title, identify the document as a realist synthesis or review                                                                                                                                                                                                                                                                                                                                                                                                                                                                                      | 1,2                 |
| ABSTRACT                                          |                                       |                                                                                                                                                                                                                                                                                                                                                                                                                                                                                                                                                           |                     |
| 2                                                 |                                       | While acknowledging publication requirements and house style, abstracts should ideally contain brief details of: the study's background, review question or objectives; search strategy; methods of selection, appraisal, analysis and synthesis of sources; main results; and implications for practice.                                                                                                                                                                                                                                                 | 2                   |
| INTRODUCTION                                      |                                       |                                                                                                                                                                                                                                                                                                                                                                                                                                                                                                                                                           |                     |
| 3                                                 | Rationale for review                  | Explain why the review is needed and what it is likely to contribute to existing understanding of the topic area.                                                                                                                                                                                                                                                                                                                                                                                                                                         | 4                   |
| 4                                                 | Objectives and focus of review        | State the objective(s) of the review and/or the review question(s). Define and provide a rationale for the focus of the review.                                                                                                                                                                                                                                                                                                                                                                                                                           | 5                   |
| METHODS                                           |                                       |                                                                                                                                                                                                                                                                                                                                                                                                                                                                                                                                                           |                     |
| 5                                                 | Changes in the review process         | Any changes made to the review process that was initially planned should be briefly described and justified.                                                                                                                                                                                                                                                                                                                                                                                                                                              | N/A                 |
| 6                                                 | Rationale for using realist synthesis | Explain why realist synthesis was considered the most appropriate method to use.                                                                                                                                                                                                                                                                                                                                                                                                                                                                          | 6                   |
| 7                                                 | Scoping the literature                | Describe and justify the initial process of exploratory scoping of the literature.                                                                                                                                                                                                                                                                                                                                                                                                                                                                        | 6-7                 |
| 8                                                 | Searching processes                   | While considering specific requirements of the journal or other publication outlet, state and provide a rationale for how the iterative searching was done. Provide details on all the sources accessed for information in the review. Where searching in electronic databases has taken place, the details should include, for example, name of database, search terms, dates of coverage and date last searched. If individuals familiar with the relevant literature and/or topic area were contacted, indicate how they were identified and selected. | 7-8                 |
| 9                                                 | Selection and appraisal of documents  | Explain how judgements were made about including and excluding data from documents, and justify these.                                                                                                                                                                                                                                                                                                                                                                                                                                                    | 8-9                 |
| 10                                                | Data extraction                       | Describe and explain which data or information were extracted from the included documents and justify this selection.                                                                                                                                                                                                                                                                                                                                                                                                                                     | 8-9                 |
| 11                                                | Analysis and synthesis processes      | Describe the analysis and synthesis processes in detail. This section should include information on the constructs analyzed and describe the analytic process.                                                                                                                                                                                                                                                                                                                                                                                            | 9                   |
| RESULTS                                           |                                       |                                                                                                                                                                                                                                                                                                                                                                                                                                                                                                                                                           |                     |
| 12                                                | Document flow diagram                 | Provide details on the number of documents assessed for eligibility and included in the review with reasons for exclusion at each stage as well as an indication of their source of origin (for example, from searching databases, reference lists and so on). You may consider using the example templates (which are likely to need modification                                                                                                                                                                                                        | 8                   |

| Items required when reporting a realist synthesis |                                                       |                                                                                                                                                                                                                                                                                                                                                                   | Reported on page(s) |
|---------------------------------------------------|-------------------------------------------------------|-------------------------------------------------------------------------------------------------------------------------------------------------------------------------------------------------------------------------------------------------------------------------------------------------------------------------------------------------------------------|---------------------|
|                                                   |                                                       | to suit the data) that are provided.                                                                                                                                                                                                                                                                                                                              |                     |
| 13                                                | Document characteristics                              | Provide information on the characteristics of the documents included in the review.                                                                                                                                                                                                                                                                               | 10                  |
| 14                                                | Main findings                                         | Present the key findings with a specific focus on theory building and testing.                                                                                                                                                                                                                                                                                    | 10-14               |
| DISCUSSION                                        |                                                       |                                                                                                                                                                                                                                                                                                                                                                   |                     |
| 15                                                | Summary of findings                                   | Summarize the main findings, taking into account the review's objective(s), research question(s), focus and intended audience(s).                                                                                                                                                                                                                                 | 14-15               |
| 16                                                | Strengths, limitations and future research directions | Discuss both the strengths of the review and its limitations. These should include (but need not be restricted to) (a) consideration of all the steps in the review process and (b) comment on the overall strength of evidence supporting the explanatory insights which emerged.<br>The limitations identified may point to areas where further work is needed. | 15-16, 17-18        |
| 17                                                | Comparison with existing literature                   | Where applicable, compare and contrast the review's findings with the existing literature (for example, other reviews) on the same topic.                                                                                                                                                                                                                         | 16-17               |
| 18                                                | Conclusion and recommendations                        | List the main implications of the findings and place these in the context of other relevant literature. If appropriate, offer recommendations for policy and practice.                                                                                                                                                                                            | 16-18               |
| 19                                                | Funding                                               | Provide details of funding source (if any) for the review, the role played by the funder (if any) and any conflicts of interests of the reviewers.                                                                                                                                                                                                                | 19-20               |

# BMJ Open

## Sustaining community-based interventions for people affected by dementia long term: The SCI-Dem realist review

|                                 |                                                                                                                                                                                                                                                                                                                             |
|---------------------------------|-----------------------------------------------------------------------------------------------------------------------------------------------------------------------------------------------------------------------------------------------------------------------------------------------------------------------------|
| Journal:                        | <i>BMJ Open</i>                                                                                                                                                                                                                                                                                                             |
| Manuscript ID                   | bmjopen-2020-047789.R1                                                                                                                                                                                                                                                                                                      |
| Article Type:                   | Original research                                                                                                                                                                                                                                                                                                           |
| Date Submitted by the Author:   | 22-Feb-2021                                                                                                                                                                                                                                                                                                                 |
| Complete List of Authors:       | Morton, Thomas; University of Worcester, Association for Dementia Studies<br>Wong, Geoff; Oxford University, Nuffield Department of Primary Care Health Sciences<br>Atkinson, Teresa; University of Worcester, Association for Dementia Studies<br>Brooker, Dawn; University of Worcester, Association for Dementia Studies |
| <b>Primary Subject Heading</b>: | Health services research                                                                                                                                                                                                                                                                                                    |
| Secondary Subject Heading:      | Geriatric medicine, Health policy, Mental health, Public health, Sociology                                                                                                                                                                                                                                                  |
| Keywords:                       | Health policy < HEALTH SERVICES ADMINISTRATION & MANAGEMENT, Organisation of health services < HEALTH SERVICES ADMINISTRATION & MANAGEMENT, Dementia < NEUROLOGY, Old age psychiatry < PSYCHIATRY, SOCIAL MEDICINE                                                                                                          |
|                                 |                                                                                                                                                                                                                                                                                                                             |

SCHOLARONE™  
Manuscripts

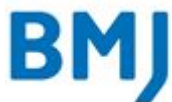

I, the Submitting Author has the right to grant and does grant on behalf of all authors of the Work (as defined in the below author licence), an exclusive licence and/or a non-exclusive licence for contributions from authors who are: i) UK Crown employees; ii) where BMJ has agreed a CC-BY licence shall apply, and/or iii) in accordance with the terms applicable for US Federal Government officers or employees acting as part of their official duties; on a worldwide, perpetual, irrevocable, royalty-free basis to BMJ Publishing Group Ltd ("BMJ") its licensees and where the relevant Journal is co-owned by BMJ to the co-owners of the Journal, to publish the Work in this journal and any other BMJ products and to exploit all rights, as set out in our [licence](#).

The Submitting Author accepts and understands that any supply made under these terms is made by BMJ to the Submitting Author unless you are acting as an employee on behalf of your employer or a postgraduate student of an affiliated institution which is paying any applicable article publishing charge ("APC") for Open Access articles. Where the Submitting Author wishes to make the Work available on an Open Access basis (and intends to pay the relevant APC), the terms of reuse of such Open Access shall be governed by a Creative Commons licence – details of these licences and which [Creative Commons](#) licence will apply to this Work are set out in our licence referred to above.

Other than as permitted in any relevant BMJ Author's Self Archiving Policies, I confirm this Work has not been accepted for publication elsewhere, is not being considered for publication elsewhere and does not duplicate material already published. I confirm all authors consent to publication of this Work and authorise the granting of this licence.

1  
2  
3  
4  
5  
6  
7  
8 **Sustaining community-based interventions for people affected by dementia**  
9 **long term: The SCI-Dem realist review**  
10  
11  
12  
13  
14  
15  
16

17 **Authors:**

18 **Thomas Morton**, Association for Dementia Studies, University of Worcester, Worcester, UK.

19 **Geoffrey Wong**, Nuffield Department of Primary Care Health Sciences, University of Oxford, Oxford,  
20 UK.  
21

22 **Teresa Atkinson**, Association for Dementia Studies, University of Worcester, Worcester, UK.  
23

24 **Dawn Brooker**, Association for Dementia Studies, University of Worcester, Worcester, UK.  
25  
26  
27  
28  
29  
30  
31  
32  
33

34 **Corresponding Author:**

35 **Professor Dawn Brooker**, Director of the Association for Dementia Studies, School of Allied Health  
36 and Community, University of Worcester, Henwick Grove, Worcester WR2 6AJ.  
37  
38

39 Email: *d.brooker@worc.ac.uk*. Tel: 01905 855250  
40  
41  
42  
43  
44  
45  
46  
47  
48  
49  
50  
51  
52  
53  
54  
55  
56  
57  
58  
59  
60

## Sustaining community-based interventions for people affected by dementia long term: The SCI-Dem realist review

Thomas Morton<sup>1</sup> Geoffrey Wong<sup>2</sup> Teresa Atkinson<sup>1</sup> Dawn Brooker<sup>1</sup>

### ABSTRACT

**Objectives:** Community-based support for people with earlier-stage dementia and their care partners, such as regularly-meeting groups and activities, can play an important part in post-diagnostic care. Typically delivered piecemeal in the UK by a variety of agencies with inconsistent funding, provision is fragmented and many such interventions struggle to continue after only a short start-up period. This realist review investigates what can promote or hinder them in being able to sustain long-term.

**Methods:** Key sources of evidence were gathered using formal searches of electronic databases and grey literature, together with informal search methods such as citation tracking and snowballing. No restrictions were made on type of article or study design, but only data pertaining to regularly-meeting, ongoing, community-based interventions for those affected by dementia were included. Data were extracted, assessed, organised and synthesised and a realist logic of analysis applied to trace context-mechanism-outcome configurations as part an overall programme theory. Consultation with stakeholders, involved with a variety of such interventions in various roles, informed this process throughout.

**Results:** Ability to continually get and keep members; staff and volunteers; the support of other services and organisations; and funding/income were found to be critical in long-term sustainability, with multiple mechanisms feeding into these sub-outcomes, sensitive to context. These included an emphasis on socialising and person-centredness; lowering stigma and logistical barriers; providing satisfaction, support and recognition for personnel; networking, raising awareness and sharing with other organisations, while avoiding conflict; and skilled financial planning and management. Challenges were especially acute for small-scale and rural groups.

**Conclusions:** This review presents a theoretical model of the factors and mechanisms involved in the long term sustainability of community-based interventions. While the data used predated the COVID-19 pandemic, it can provide a framework for new research to look at what sustainability-impacting elements might have been affected, and how.



## Article Summary

- This review brings together transferrable learning from a wide range of intervention types on a topic that has received little formal, integrated research attention, to deepen our understanding on how such interventions could be implemented and supported to sustain more universally and consistently across the sector.
- This review's realist approach is well suited to accommodate and account for the complexity of such 'real life' intervention programmes, as implemented under different conditions in different settings, to extract transferable conclusions.
- This review was designed to gather evidence regarding how interventions can be sustained, not on the efficacy/effectiveness of interventions of this type, hence conclusions regarding the latter are beyond its scope.
- Literature was limited as this research question is not commonly the main focus of study in dementia care research.
- Not all of the data were of equal depth and detail or the highest empirical rigour, rather contributing together in a way that is useful to an overall programme theory that will benefit from further refinement and revision with empirical testing in subsequent research.

## Keywords

Dementia; Post-diagnosis; Peer support; Psychosocial; Implementation

## INTRODUCTION

Supporting people with dementia and their carers to live as well as possible in their communities, with timely psychosocial support, is a global public health goal,<sup>1</sup> though remains a challenging aspiration in many countries. In the UK, with an aging population<sup>2</sup> and increasing pressure on already-stretched health services<sup>3</sup> policy has for some time pointed to the need to move towards a model of social care where more people are cared for and supported at home, in the community. Improving provision of early, post-diagnosis support, support for family carers and support for integrated care (involving the voluntary and independent sectors) – all in a more dementia-friendly community environment – are contemporary UK Government priorities for dementia care.<sup>4</sup>

Support following a diagnosis of dementia is patchy,<sup>4</sup> however, with families in some areas lacking any formal proactive support for those with less severe symptoms, beyond occasional contact with primary care and third sector. There are significant gaps in social care for people affected by dementia across the UK.<sup>5 6 7</sup> Multiple recent reports describe a climate where the state of social care provision – mainly delivered piecemeal by private and third-sector organisations – is “precarious and dysfunctional” in many parts of the country<sup>6</sup> and in some areas has “broken down” creating “care deserts”.<sup>5</sup> There is an associated reliance on informal carers (e.g. family members) to provide support but there is a growing recognition that informal carers’ own health and wellbeing is often negatively impacted by their caring activities.<sup>6</sup> The detrimental health impact of social isolation and loneliness is also increasingly being recognised,<sup>8 9</sup> with survey data revealing nearly 60% of people living with dementia report loneliness, isolation and losing touch with people in their lives since diagnosis, around a quarter feeling they are not part of their community and that people avoid them.<sup>7</sup> Family carers can also be subject to such loneliness and isolation.<sup>10</sup> This situation has only been exacerbated by the recent impact of COVID-19,<sup>11</sup> bringing the need for groups and activities that provide social connection and support for people and families affected by dementia into stark relief.

1  
2  
3  
4  
5  
6  
7  
8  
9  
10  
11  
12  
13  
14  
15  
16  
17  
18  
19  
20  
21  
22  
23  
24  
25  
26  
27  
28  
29  
30  
31  
32  
33  
34  
35  
36  
37  
38  
39  
40  
41  
42  
43  
44  
45  
46  
47  
48  
49  
50  
51  
52  
53  
54  
55  
56  
57  
58  
59  
60

There have been various attempts to mitigate these challenges in communities across the country, in the form of groups and activities for people with dementia and family carers. These aim to serve a number of functions: peer support, companionship and help for people to reintegrate with their communities; delivery of professional support, psychosocial interventions and physical exercise; a point of contact, signposting and referral for other services; or raising awareness and acting as a dementia-friendly community hub. The benefits of such community-based initiatives are now being recognised.<sup>12 13 14 15 16</sup> There is evidence that regular social activity, where people are able to leave their homes and gather together in a communal setting on a frequent and ongoing basis, can be helpful both for people living with dementia and the people who care for them.<sup>12 13 17 18 19</sup> With care systems unprepared for the forecasted UK doubling of the number of people living with dementia (1.6 million) and tripling of social care costs by 2040,<sup>20</sup> improving provision of evidence-based community initiatives for people with dementia, and their families, is imperative.<sup>12 13 14 15 16 21 22</sup> However, even prior to the 2020 pandemic restrictions, such initiatives, groups and activities already faced a variety of challenges with long-term sustainability. These challenges and how to meet them are much talked about in the dementia care policy, rhetoric and practice arenas but have received very little research attention.

This realist review aims to deepen our understanding of what can help or hinder the long-term sustainability of regularly meeting, place-based community interventions, such as groups and activities, for people affected by dementia. It aims to use data gathered as the basis of evidence-informed recommendations for policy and practice.

## METHODS

This review was conducted from December 2018 to December 2020. A project protocol was registered with PROSPERO in March 2019<sup>23</sup> and the protocol was published in this journal in June 2019.<sup>24</sup>

1  
2  
3 The realist review is an interpretive, theory-driven approach to synthesising evidence from a  
4 range of sources, including qualitative, quantitative and mixed-methods research.<sup>25</sup> This approach is  
5 designed to accommodate and account for the complexity of 'real life' intervention programmes, as  
6 implemented under different conditions in different settings, aiming to explain how and why context  
7 can influence outcomes.<sup>26</sup> Hence it is well suited to extracting transferable lessons from reviewing  
8 the functioning and success (or otherwise) of a range of community-based interventions for people  
9 affected by dementia, as these are likely to involve a high level of complexity and be responsive to  
10 contextual factors which are likely to vary considerably from intervention to intervention. Data was  
11 gathered and synthesized, with a realist logic of analysis applied to identify causal chains involving  
12 different contexts, mechanisms and outcomes that can in turn affect an initiative's long-term  
13 sustainability. We define context as the conditions that trigger or modify the behaviour of  
14 mechanisms;<sup>27</sup> mechanisms are the usually-hidden processes that generate outcomes, defined as  
15 "underlying entities, processes, or structures which operate in particular contexts to generate  
16 outcomes of interest."<sup>28</sup> outcomes can be "either intended or unintended and can be proximal,  
17 intermediate, or final"<sup>27</sup> and in this review refer to any identifiable result (of the interaction between  
18 contexts and mechanisms) that can directly have a bearing on an intervention's ability to sustain  
19 long-term.

20  
21  
22  
23  
24  
25  
26  
27  
28  
29  
30  
31  
32  
33  
34  
35  
36  
37  
38  
39  
40  
41  
42 Our review followed Pawson's five iterative stages<sup>29</sup> as outlined below.

#### 43 44 45 *Step 1: Locating existing theories*

46  
47 This initial step was to identify and gather existing ideas around what can help or hinder the  
48 sustainability of a group or activity, from those who have first-hand experience of them. In line with  
49 realist review guidelines (RAMESES),<sup>30</sup> stakeholders were contacted by TA and TM and consulted for  
50 input at points throughout the project. These stakeholders were lay experts involved with  
51 community-based interventions in various capacities, whether commissioning, leading, running,  
52 supporting or attending. In the first instance a workshop was held in March 2019 with a group of 13  
53  
54  
55  
56  
57  
58  
59  
60

1  
2  
3 invited stakeholders to gather their content expertise on barriers and facilitators to engagement and  
4 sustainability. Eight others were subsequently consulted by TM individually, in person, by telephone  
5 or by email. Input was also taken by TA and TM from members and facilitators of various local DEEP  
6 (Dementia Engagement and Empowerment Project)<sup>31</sup> groups at a national meeting in June 2019, and  
7 TM also visited three community groups in Herefordshire, Oxfordshire and Wolverhampton. In  
8 addition, an exploratory search of the literature was conducted by TM, using informal methods such  
9 as citation tracking and snow-balling<sup>32</sup> along with informal scoping searches<sup>33</sup> and the gathering of  
10 relevant publications and materials recommended by stakeholders. Together, this contributed  
11 towards the building of an initial theoretical model, or *programme theory*, with the guidance of GW,  
12 prior to our main search, both to inform our formal search strategy and to be tested and refined by  
13 the data subsequently found. This model began as two diagrams (one regarding engagement, one  
14 regarding sustainability) drawn up by TM and TA by batching issues raised at the March workshop,  
15 and possible links between them. These diagrams were then discussed, altered and added to  
16 iteratively over four months as new stakeholder input became available (these can be seen in  
17 Supplementary file 1). These diagrams were speculative so kept deliberately broad and fluid in focus,  
18 as a work in progress. Detailed analysis of possible context-mechanism-outcome configurations  
19 (CMOCs) was not considered appropriate at this stage, as: 1) Not enough data had been gathered; 2)  
20 This would be both labour intensive and too limiting for a model whose purpose was only as a  
21 steering guide to inform the review proper, yet to be undertaken.

## 22 *Step 2: Search for evidence*

### 23 **Formal search**

24 Formal searching activity took place between May and September 2019. A search strategy was  
25 designed, piloted and conducted by the research team with the guidance from an information  
26 specialist (CK) (see Supplementary file 2). The following databases were searched: Academic Search  
27 Complete; AMED; CINAHL; EMBASE; MEDLINE; ProQuest; PsycINFO; PubMed; Scopus and Social Care  
28

1  
2  
3 Online. In keeping with RAMESES guidelines,<sup>30</sup> no restrictions were made on the type of article or  
4  
5 study design eligible for inclusion, other than being more recent than 1990. Documents such as  
6  
7 editorials, opinion pieces, information guides, publicity materials, newspaper and magazine articles,  
8  
9 evaluation reports, PhD theses and research poster and slide presentations were included along with  
10  
11 peer-reviewed journal articles, if found to be holding relevant information. Search terms were kept  
12  
13 uniform across all databases and searching was carried out by looking for the occurrence of these  
14  
15 within the title, abstract and key words of documents (or nearest equivalent) in each database.  
16  
17 Database-specific defined keywords were not used as the types of intervention were not only very  
18  
19 diverse but often without a common agreed terminology, hence using too narrowly-specified terms  
20  
21 would have resulted in an unmanageably voluminous list of possible key words, without necessarily  
22  
23 locating better targeted results, and could be limiting and misleading. In addition the nature of this  
24  
25 review's research question is atypical in that it does not have an efficacy/effectiveness focus in  
26  
27 common with many of its sources of data, hence manual screening was key in determining  
28  
29 relevance. A disadvantage of this was that we had to accept a higher ratio of irrelevant search hits  
30  
31 which then had to be excluded through manual screening of title and abstract.  
32  
33  
34  
35  
36

37  
38 After removing duplicates, records were screened by title and abstract by TM using the  
39  
40 eligibility criteria, ensuring interventions covered were those targeted at people with dementia and  
41  
42 their families living in the community, that brought people together physically and met on a  
43  
44 frequent, regular and an on-going basis (these criteria are outlined in full detail in Supplementary file  
45  
46 3). Interventions exclusively for those with severe dementia at advanced stages were excluded as  
47  
48 these were not the focus of this review. As those with severe dementia have high needs and are less  
49  
50 likely to be living independently in the community, by their nature community-based interventions  
51  
52 where people meet outside of their home are likely to serve those who are towards the start of their  
53  
54 dementia journey rather than those at an advanced stage, and are distinct from more acute care.  
55  
56  
57  
58  
59  
60

1  
2  
3 Full text of documents were then obtained of the remaining records, and again screened by  
4  
5 close reading against the eligibility criteria by TM. A 10% random subsample of was reviewed  
6  
7 independently at each of these stages by a second reviewer (TA) with disagreements recorded and  
8  
9 resolved by discussion. Informal searching continued iteratively alongside the formal search and in  
10  
11 response to articles found in it, congruent with the realist review process which allows searching to  
12  
13 be revised as necessary as the review progresses.<sup>30</sup> In certain cases, documents regarding on  
14  
15 interventions that met only some, not all, of the inclusion criteria were included if found to contain  
16  
17 information on hypothesised mechanisms, with reason to believe such mechanisms may function  
18  
19 similarly or analogously in types of intervention that are closely related.<sup>29</sup>  
20  
21  
22

#### 23 24 *Steps 3 and 4: Article selection, data extraction and organisation*

25  
26  
27 Figure 1 shows a PRISMA diagram outlining the full screening and selection process.  
28  
29

30 **[Figure 1 here]**  
31

32  
33 Following screening and close-reading of full texts for eligibility, full texts of the remaining  
34  
35 122 articles were loaded into NVivo qualitative data analysis software to help locate and categorise  
36  
37 (code) relevant sections of text containing data regarding contexts, mechanisms or outcomes  
38  
39 pertinent to the long-term sustainability of the intervention they described. Coding was both  
40  
41 inductive (codes created in response to data as found) and deductive (codes created in advance,  
42  
43 informed by the initial programme theory) and carried out by TM (An overview of top-level 'parent'  
44  
45 codes can also be seen in Supplementary file 1; deductive codes can be identified in that they mirror  
46  
47 the headings of the initial model diagrams). The characteristics of the articles were also extracted  
48  
49 separately into an EXCEL spreadsheet.  
50  
51

52  
53 During this extraction and organisation process, more fine-grained assessments of relevance  
54  
55 (to answering the research question) and rigour (the trustworthiness and credibility of the data and  
56  
57 its source)<sup>25 34</sup> were made by TM, with a random sample of 10% of articles again selected, assessed  
58  
59  
60

1  
2  
3 independently and discussed with TA. The data an article contained was assessed on its own merits,  
4  
5 not on that of the paper or study as a whole. This is because it was recognised that poorly designed  
6  
7 or conducted research may still contain good quality 'nuggets' of information for a realist review,<sup>34</sup>  
8  
9  
10 <sup>35</sup> or a document meeting inclusion criteria may not contain any relevant data. Due to the variety  
11  
12 and breadth of the type of article included in the review, a standardised relevance and rigour  
13  
14 assessment tool that would be appropriate in all cases was impossible to design.<sup>25</sup> Rather a set of  
15  
16 general principles was agreed to guide a 'traffic light' assessment system of low, medium and high  
17  
18 relevance, and low, medium and high rigour (see Supplementary file 3 for detail). Reasons for each  
19  
20 assessment were outlined and logged for each article, and compared with each other to ensure  
21  
22 consistency. Ambiguous cases of relevance or rigour were discussed with the wider project team as  
23  
24 they arose. A decision was made by the project team to exclude articles assessed to have data of low  
25  
26 relevance or low rigour to ensure a more robust data-set with which to build the final programme  
27  
28 theory and context-mechanism-outcome configurations.  
29  
30

### 31 32 33 *Step 5: Synthesising the evidence and drawing conclusions*

34  
35  
36 Once data from the remaining articles were extracted and categorised, key outcome themes were  
37  
38 identified by discussion with the whole team. These themes and categories were presented to the  
39  
40 stakeholders for comment and feedback, to determine what was most important to focus upon, if  
41  
42 they felt anything had been overlooked and if any changes or refinements should be made. Four key  
43  
44 outcome areas (getting and keeping members, personnel, support of other organisations and  
45  
46 funding/income) were settled upon. Data were then organised under these headings in the form of  
47  
48 "If-then" statements that provided initial explanations of how, why, for whom and in which contexts  
49  
50 these outcomes might arise, initially by TM but with input from DB and TA. These were then further  
51  
52 refined, with guidance from GW, using a realist logic of analysis to identify cause-and-effect chains in  
53  
54 the data and finally elaborated into context-mechanism-outcome configurations (CMOCs).<sup>30</sup> Related  
55  
56 CMOCs were then grouped together to create recommendations for practice or policy that also  
57  
58  
59  
60



1  
2  
3 acted as a summary of the CMOCs found. Diagrams of the factors found affecting sustainability, and  
4  
5 how they are likely to relate to each other within an overall programme theory, were also designed  
6  
7 through team discussion and drawn by TM.  
8  
9

### 10 **Patient and public involvement**

11  
12  
13 The research question was developed during the authors' previous work with community  
14  
15 interventions (for example, but not limited to, Meeting Centres)<sup>12 13</sup> and the practical problems  
16  
17 encountered with sustaining such interventions expressed both personnel and members of the  
18  
19 public attending. This review mainly involved the gathering of secondary data so did not involve  
20  
21 patients or public directly as study participants. However people with dementia, their family and  
22  
23 friends, intervention staff and volunteers and other community stakeholders were consulted as  
24  
25 content experts throughout, informing the search strategy, data synthesis, development of materials  
26  
27 and channels for dissemination. More information on our stakeholder consultation process can be  
28  
29 found under *Step 1: Locating existing theories* and *Step 5: Synthesising the evidence and drawing*  
30  
31 *conclusions*.  
32  
33  
34  
35  
36  
37  
38  
39

### 40 **RESULTS**

41  
42 In total, 61 articles were coded to develop the CMOCs used to refine and expand our initial  
43  
44 programme theory (see Supplementary file 4 for a detailed list of included articles). They were  
45  
46 published between 1990 and 2020, and ranged in type: most were either peer-reviewed journal  
47  
48 articles (28) or formal reports/evaluations (18); information guides (8), news feature articles (3),  
49  
50 doctoral theses (2) and conference presentation paraphernalia (2) were also analysed. About half of  
51  
52 these articles (33) were authored (or co-authored) in the UK, consistent with a proportion being  
53  
54 identified informally through UK-based stakeholders (see Figure 2). Four articles had international  
55  
56 authorship. Other countries of origin (or co-origin) comprised the US (8), Netherlands (7), Germany  
57  
58  
59  
60

1  
2  
3 (5), Canada (4), Italy (4), Norway (3), Poland (3), Australia (2), Ireland (2), Sweden (2), Chile (1), Japan  
4  
5 (1), Portugal (1) and Thailand (1). The type of intervention discussed in these articles varied broadly,  
6  
7 including: day centres/day care, social activities, sports and exercise initiatives, peer support groups,  
8  
9 arts and crafts groups, singing and music groups, cognitive stimulation, gardening activities and  
10  
11 other outdoor activities. Many interventions had multiple and overlapping elements: for example a  
12  
13 sports activity may have a social function, a drop-in day centre may have exercise and cognitive  
14  
15 stimulation activities or a craft club may have peer support built in. When an article's remit was  
16  
17 general (for example community support services, outdoor activities, social and leisure activities or  
18  
19 third sector groups) the data included from the article was only that which was relevant to our  
20  
21 programme theory and the kind of interventions outlined in the inclusion criteria (see  
22  
23 Supplementary file 3).

24  
25  
26  
27  
28 Our analysis, together with stakeholder input, identified four critical areas affecting the  
29  
30 sustainability of an intervention: members, staff and volunteers, support of other organisations and  
31  
32 funding/income. These were each sub-divided into "getting" and "keeping" outcomes in recognition  
33  
34 of changes in focus over time regarding these areas, and likely different contexts and mechanisms  
35  
36 involved as an intervention continues. Figure 2 shows an overview of factors leading to the getting  
37  
38 and keeping of members, staff and volunteers, support of other organisations and funding/income,  
39  
40 found in the article data (individual diagrams tracing factors for each critical area can be found in  
41  
42 Supplementary file 5).

43  
44  
45  
46  
47 **[Figure 2 here]**

48  
49  
50 Our analysis of the data produced 201 CMOCs (outlined in full in Supplementary file 6), all  
51  
52 covered by the above eight sub-divisions. These CMOCs provide causal explanations relating to  
53  
54 sustainability of community-based groups and activities either at the level of the individual,  
55  
56 organisation or wider. Due to the high number of CMOCs, they were further organised by grouping  
57  
58 them under practical recommendations that could follow. These recommendations are not simply  
59  
60

an end conclusion, but were also part of the data synthesizing process, as they act as a way in which to categorise and summarise the large number of CMOCs. Examples of how a number of grouped CMOCs were related to a recommendation can be seen in Table 1.

| Recommendation                                                                                                                                               | CMOCs                                                                                                                                                                                                                                                                                                                                                                                                                                                                                                                                                                                                                                                                                                                                                                                                                                                                                                                                                                                                                                                                                                                                                                                                                                                                                                                                                                                                                                                                                                                                                                                                                                                                                                                                                                                                                                                                                                                                                                                                                                    |
|--------------------------------------------------------------------------------------------------------------------------------------------------------------|------------------------------------------------------------------------------------------------------------------------------------------------------------------------------------------------------------------------------------------------------------------------------------------------------------------------------------------------------------------------------------------------------------------------------------------------------------------------------------------------------------------------------------------------------------------------------------------------------------------------------------------------------------------------------------------------------------------------------------------------------------------------------------------------------------------------------------------------------------------------------------------------------------------------------------------------------------------------------------------------------------------------------------------------------------------------------------------------------------------------------------------------------------------------------------------------------------------------------------------------------------------------------------------------------------------------------------------------------------------------------------------------------------------------------------------------------------------------------------------------------------------------------------------------------------------------------------------------------------------------------------------------------------------------------------------------------------------------------------------------------------------------------------------------------------------------------------------------------------------------------------------------------------------------------------------------------------------------------------------------------------------------------------------|
| <p>Getting Members:</p> <p><b>Ensure a warm, welcoming, non-stigmatising introduction, with strong staff interpersonal skills and an appealing venue</b></p> | <p>CMOC 3: If facilitators are knowledgeable and empathetic, with good interpersonal skills (C), an initiative will be perceived as more welcoming and inclusive (O), as they will be better at understanding needs, engaging and building trust with potential members and their families (M).<sup>36 37 38 39 40 41</sup></p> <p>CMOC 4: If an initiative has an informal, unrushed and warm welcome on first visit (C), then people are more likely to want to return (O), as they are more likely to find the experience relaxing and enjoyable, not uncomfortable and intimidating (M).<sup>40 42 43 44 45</sup></p> <p>CMOC 5: If potential members have had poor previous experiences with groups or activities (dementia related or not) (C), they may not want to try another group or activity (O), because they think the experience will be similar and will want to avoid it (M).<sup>37 41 46 47</sup></p> <p>CMOC 6: If time is taken for personal contact, home visits or taster sessions with potential members (C), then people are more likely to come (O), as they will feel more familiar with the initiative and more trusting of those running it (M).<sup>36 38 47 48 49 50</sup></p> <p>CMOC 7: If an initiative is familiar and trusted, or local and well integrated with other organisations in the community (C), then people are more likely to come (O), as its links to familiar things that they trust will make it less intimidating (M).<sup>37 41 42 48 51 52 53 54 55 56</sup></p> <p>CMOC 8: If an intervention is based in familiar surroundings in, and open to, the community (C), then people are more likely to come (O), because potential members will find the normalcy, lack of stigma and chance for social integration appealing (M).<sup>38 41 48 52 57 58 59 60 61 62</sup></p> <p>CMOC 9: If a venue is dementia-friendly, comfortable and accessible (C), people are more likely to come (O), as they will not have concerns about comfort or access (M).<sup>48 55 63 64</sup></p> |
| <p>Keeping Members:</p> <p><b>Keep activities relaxed, loose and focussed on the social, and encourage friendships and peer support</b></p>                  | <p>CMOC 47: If there is group cohesion and mutual trust between members (C), then a group is more likely to sustain (O), because members will feel more solidarity and investment in the group (M).<sup>65</sup></p> <p>CMOC 48: If friendships between members are encouraged, recognised and supported by staff and activities (C), then people are likely to keep coming (O), as they will feel more supported, comfortable and engaged, and able to support each other (M).<sup>43 54 66 67 68</sup></p> <p>CMOC 49: If an intervention is too focussed on agendas, rules and expectations (C), then people may stop coming (O), because they feel pressured, restricted and unable to relax and enjoy the social and emotional benefits important to them (M).<sup>44 45 63 67 69 70 71</sup></p> <p>CMOC 50: If the pace of activity through the day/session is too fast and strict (C), then people may stop coming (O), because they will struggle to stay engaged and will not enjoy themselves (M).<sup>43 48 57 61 72</sup></p> <p>CMOC 51: If ample informal time is made for socialising, peer support and feedback (C), then members are more likely to keep coming (O), as they will be more likely to feel comfortable and supported (M).<sup>40 43 48 50 58 62 65 67 69 70 71 72 73 74 75</sup></p> <p>CMOC 52: If there is opportunity to have communal eating and relaxing in a “cozy” environment (C), then members are more likely</p>                                                                                                                                                                                                                                                                                                                                                                                                                                                                                                                                                                              |

|  |                                                                                                  |
|--|--------------------------------------------------------------------------------------------------|
|  | to keep coming (O), as this will provide comfort and foster group cohesion (M). <sup>40 65</sup> |
|--|--------------------------------------------------------------------------------------------------|

**Table 1** Examples of CMOCs leading to recommendations

## Recommendations for practice

In total, 41 recommendations for practice were drawn from the CMOCs as can be seen in Table2.

| Getting Members                                                                                                                                                                                                                                                                                                                                                                                                                                                                                                                                                                                                                                                                                                                                                                                                                                                                                                                                                                                                                                                                                                                                                                                                                                                                                                                                                                                                                                                                                                                                                                                                                                                                                                                                                                                                                                                                                                                                                                                                                                                              | Keeping Members                                                                                                                                                                                                                                                                                                                                                                                                                                                                                                                                                                                                                                                                                                                                                                                                                                                                                                                                                                                                                                                                                                                                                                                                                                                                                                                                                                                                                                                                                                   |
|------------------------------------------------------------------------------------------------------------------------------------------------------------------------------------------------------------------------------------------------------------------------------------------------------------------------------------------------------------------------------------------------------------------------------------------------------------------------------------------------------------------------------------------------------------------------------------------------------------------------------------------------------------------------------------------------------------------------------------------------------------------------------------------------------------------------------------------------------------------------------------------------------------------------------------------------------------------------------------------------------------------------------------------------------------------------------------------------------------------------------------------------------------------------------------------------------------------------------------------------------------------------------------------------------------------------------------------------------------------------------------------------------------------------------------------------------------------------------------------------------------------------------------------------------------------------------------------------------------------------------------------------------------------------------------------------------------------------------------------------------------------------------------------------------------------------------------------------------------------------------------------------------------------------------------------------------------------------------------------------------------------------------------------------------------------------------|-------------------------------------------------------------------------------------------------------------------------------------------------------------------------------------------------------------------------------------------------------------------------------------------------------------------------------------------------------------------------------------------------------------------------------------------------------------------------------------------------------------------------------------------------------------------------------------------------------------------------------------------------------------------------------------------------------------------------------------------------------------------------------------------------------------------------------------------------------------------------------------------------------------------------------------------------------------------------------------------------------------------------------------------------------------------------------------------------------------------------------------------------------------------------------------------------------------------------------------------------------------------------------------------------------------------------------------------------------------------------------------------------------------------------------------------------------------------------------------------------------------------|
| <p><b>Emphasise the social aspects of your intervention, including food and refreshments, for wide appeal</b></p> <p>CMOC 1 – CMOC 2 <sup>40 48 50 57 58 59 62 64 75</sup></p> <p><b>Ensure a warm, welcoming, non-stigmatising introduction, with strong staff interpersonal skills and an appealing venue</b></p> <p>CMOC 3 – CMOC 9 <sup>36 37 38 39 40 41 42 43 44 45 46 47 48 49 50 51 52 53 54 55 56 57 58 59 60 61 62 63 64</sup></p> <p><b>Foster understanding and support from trusted friends, family and health professionals, as their encouragement can be key</b></p> <p>CMOC 10 – CMOC 14 <sup>36 38 41 42 47 48 54 56 58 62 65 73 75 76 77 78 79</sup></p> <p><b>Provide meaningful activities that have resonance with people's interests and experience, personal history and culture</b></p> <p>CMOC 15 – CMOC 20 <sup>41 44 45 47 48 50 53 56 57 58 62 63 64 65 67 69 70 71 72 77 80 81 82 83 84</sup></p> <p><b>Be sensitive to differences in abilities, ages and stages and aim to empower members rather than avoid challenges for them</b></p> <p>CMOC 21 – CMOC 24 <sup>37 43 48 58 60 62 63 64 69 73 79</sup></p> <p><b>Offer information and advice to connect with a broad range of people who may be in need</b></p> <p>CMOC 25 <sup>42 44 45 54 73 85</sup></p> <p><b>Ensure people can get there easily, safely, reliably and cheaply</b></p> <p>CMOC 26 – CMOC 30 <sup>36 37 38 44 45 47 48 49 53 56 59 60 61 64 65 73 76 78 82 85 86</sup></p> <p><b>Stay in constant contact with potential referrers and keep them involved</b></p> <p>CMOC 31 – CMOC 32 <sup>41 46 51 54 55 61 74 75 79</sup></p> <p><b>Your "public relations" strategy should focus on who the intervention is for and what people can expect, and use existing networks to spread your message</b></p> <p>CMOC 33 – CMOC 41 <sup>36 37 38 41 44 45 46 47 48 49 51 54 56 59 61 62 66 67 70 72 73 74 75 78 80 82 83 84 87 88 89</sup></p> <p><b>Consider simple and easy self referral</b></p> <p>CMOC43 – CMOC 46 <sup>38 44 45 47 57 61 74 76 79 80 83 88</sup></p> | <p><b>Keep activities relaxed, loose and focussed on the social, and encourage friendships and peer support</b></p> <p>CMOC 47 – CMOC 52 <sup>40 43 44 45 48 50 54 57 58 61 62 63 65 66 67 68 69 70 71 72 73 74 75</sup></p> <p><b>Encourage normalised activities and social integration outside of the group to empower members and reduce stigma</b></p> <p>CMOC 53 – CMOC 57 <sup>37 38 41 46 47 48 49 52 54 57 58 59 61 62 66 67 71 76 90</sup></p> <p><b>Be person-centred: Give members input into planning and decision-making, and respect their individual needs and autonomy</b></p> <p>CMOC 58 – CMOC 63 <sup>36 40 41 42 43 44 45 46 48 52 55 59 61 63 65 66 67 71 74 84 91</sup></p> <p><b>Talk to family or care partners about what arrangements and support they need in place</b></p> <p>CMOC 64 – CMOC 65 <sup>38 44 45 47 48 49 50 54 57 60 61 73 78</sup></p> <p><b>Be sensitive to differences in abilities, ages and stages and have strategies to differentiate and manage activities so needs don't clash</b></p> <p>CMOC 66 – CMOC 70 <sup>37 41 43 44 45 46 47 48 49 57 58 59 60 61 66 67 71 74 75 76 78</sup></p> <p><b>Ensure your venue is comfortable, stable and familiar, with adequate facilities and multiple spaces for use</b></p> <p>CMOC 71 – CMOC 72 <sup>43 48 55 63 89</sup></p> <p><b>Stability and reliability matters to members, so aim for structure and minimise disruption</b></p> <p>CMOC 73 – CMOC 77 <sup>36 37 38 40 43 47 48 61 65 66 67 72 73 75</sup></p> |
| Getting Staff and Volunteers                                                                                                                                                                                                                                                                                                                                                                                                                                                                                                                                                                                                                                                                                                                                                                                                                                                                                                                                                                                                                                                                                                                                                                                                                                                                                                                                                                                                                                                                                                                                                                                                                                                                                                                                                                                                                                                                                                                                                                                                                                                 | Keeping Staff and Volunteers                                                                                                                                                                                                                                                                                                                                                                                                                                                                                                                                                                                                                                                                                                                                                                                                                                                                                                                                                                                                                                                                                                                                                                                                                                                                                                                                                                                                                                                                                      |
| <p><b>Network proactively: Engage in outreach activities to boost visibility and awareness; approach other groups and organisations for help</b></p> <p>CMOC 78 – CMOC 83 <sup>46 48 50 56 58 59 61 67 69 77 80 83 84 89 91</sup></p> <p><b>Get to know potential stakeholder groups in the local population that may provide a reliable volunteer base, and consider how to reach out to them</b></p> <p>CMOC 84 – CMOC 90 <sup>53 56 62 65 81 83 91 92 93</sup></p>                                                                                                                                                                                                                                                                                                                                                                                                                                                                                                                                                                                                                                                                                                                                                                                                                                                                                                                                                                                                                                                                                                                                                                                                                                                                                                                                                                                                                                                                                                                                                                                                        | <p><b>Foster flexibility, collaboration and communication skills in personnel to create a healthy and effective working environment</b></p> <p>CMOC 96 – CMOC 97 <sup>59 60 76 79 93</sup></p> <p><b>Plan strategies to maintain the satisfaction and enjoyment of staff and volunteers, and to avoid burnout</b></p> <p>CMOC 98 – CMOC 104 <sup>38 43 52 58 61 70 74 75 84</sup></p> <p><b>If possible, have financial support in place for staff roles and</b></p>                                                                                                                                                                                                                                                                                                                                                                                                                                                                                                                                                                                                                                                                                                                                                                                                                                                                                                                                                                                                                                              |

|                                                                                                                                                                                                                                                                                                                                                                                                                                                                                                                                                                                                                                                                                                                                                                                                                                                                                                                                                                                                                                                                                                                            |                                                                                                                                                                                                                                                                                                                                                                                                                                                                                                                                                                                                                                                                                                                                                                                                                                                                                                                                                                                                            |
|----------------------------------------------------------------------------------------------------------------------------------------------------------------------------------------------------------------------------------------------------------------------------------------------------------------------------------------------------------------------------------------------------------------------------------------------------------------------------------------------------------------------------------------------------------------------------------------------------------------------------------------------------------------------------------------------------------------------------------------------------------------------------------------------------------------------------------------------------------------------------------------------------------------------------------------------------------------------------------------------------------------------------------------------------------------------------------------------------------------------------|------------------------------------------------------------------------------------------------------------------------------------------------------------------------------------------------------------------------------------------------------------------------------------------------------------------------------------------------------------------------------------------------------------------------------------------------------------------------------------------------------------------------------------------------------------------------------------------------------------------------------------------------------------------------------------------------------------------------------------------------------------------------------------------------------------------------------------------------------------------------------------------------------------------------------------------------------------------------------------------------------------|
| <p><b>Not all personnel need expertise, but ensure facilitators have good interpersonal and leadership skills, and your volunteer workforce is reliable</b></p> <p>CMOC 91 – CMOC 95 <sup>38 50 51 58 61 71 72 73 75 79</sup></p>                                                                                                                                                                                                                                                                                                                                                                                                                                                                                                                                                                                                                                                                                                                                                                                                                                                                                          | <p><b>volunteers activities, so they will feel secure and valued</b></p> <p>CMOC 105 – CMOC 108 <sup>51 67 73 79 87 84</sup></p>                                                                                                                                                                                                                                                                                                                                                                                                                                                                                                                                                                                                                                                                                                                                                                                                                                                                           |
| <p><b>Getting Support of Other Organisations</b></p> <p><b>Focus on raising awareness and communicating value both to professionals and the community, involving them where possible</b></p> <p>CMOC 110 – CMOC 114 <sup>37 39 41 42 50 54 55 61 70 75 79 80 84 86 90</sup></p> <p><b>Approach and ask other community organisations if they can help with venue, resources, training, volunteers or contacts</b></p> <p>CMOC 115 – CMOC 118 <sup>46 48 52 58 62 65 69 71 72 75 77 80 92 93</sup></p> <p><b>Use your physical location (venue or neighbourhood) as an opportunity to build links with others sharing that space</b></p> <p>CMOC 119 – CMOC 121 <sup>41 42 48 58 59 62 79</sup></p> <p><b>Seek out like-minded groups to band together with and share knowledge, resources, contacts and strategy</b></p> <p>CMOC 122 – CMOC 124 <sup>42 67 77</sup></p> <p><b>To avoid conflict with other organisations, minimise overlap, involve them or offer them something of benefit</b></p> <p>CMOC 125 – CMOC 131 <sup>41 42 46 51 60 61 67 70 72 79 84 86 88</sup></p>                                           | <p><b>Keeping Support of Other Organisations</b></p> <p><b>Maintain constant contact and information sharing with the organisations, services and referrers you work with, with a dedicated person responsible if possible</b></p> <p>CMOC 138 – CMOC 142 <sup>39 41 44 45 50 51 55 67 77 79 84</sup></p> <p><b>Seek authoritative external advice on overcoming differences in culture with other organisations, and up-skilling staff for collaboration</b></p> <p>CMOC 143 – CMOC 148 <sup>41 51 59 60 70 76 77 79 86</sup></p> <p><b>Take time to formally plan how collaboration will work, involving collaborators in that planning</b></p> <p>CMOC 149 – CMOC 152 <sup>41 44 45 51 61 70</sup></p>                                                                                                                                                                                                                                                                                                  |
| <p><b>Getting Funding and Income</b></p> <p><b>Ensure communication is clear about what the intervention does and its value</b></p> <p>CMOC 153 – CMOC 163 <sup>39 41 46 51 56 61 70 75 79 80 89 94</sup></p> <p><b>Build “social capital” and forge partnerships with other community organisations to help with costs and boost the case for viability and value for money</b></p> <p>CMOC 164 – CMOC 169 <sup>56 60 61 70 75 76 78 79 80 87 93 94 95</sup></p> <p><b>Learn how to effectively plan and network to find funding, through knowledge-sharing with like-minded groups and seeking external advice</b></p> <p>CMOC 170 – CMOC 175 <sup>37 46 55 60 61 80 86 91 94</sup></p> <p><b>Initiatives in rural areas should make clear the particular challenges that they face when seeking funding</b></p> <p>CMOC 176 – CMOC 179 <sup>50 84 91</sup></p> <p><b>Find out what the national priorities are for dementia, and see if you can tailor you activities to fit; if not, lobby to change the national agenda</b></p> <p>CMOC 180 – CMOC 184 <sup>39 41 42 50 51 55 59 76 77 80 84 86 87 91 95 96</sup></p> | <p><b>Keeping Funding and Income</b></p> <p><b>Keep in touch with previous, current and potential funders on an ongoing basis, as this will help when applying in the future</b></p> <p>CMOC 185 – CMOC 188 <sup>46 55 61 70 94</sup></p> <p><b>Pay attention to how money can be put to use most efficiently and effectively for the benefit of all by co-operating and sharing with other organisations</b></p> <p>CMOC 189 – CMOC 190 <sup>70 75 76 78 80 93</sup></p> <p><b>Plan a long-term strategy to build a portfolio of multiple income streams, that are flexible in what they contribute to paying for</b></p> <p>CMOC 191 – CMOC 194 <sup>44 45 70 80 84 94</sup></p> <p><b>Ensure someone has the time and expertise to continually seek and apply for funding</b></p> <p>CMOC 195 – CMOC 197 <sup>70 80 84</sup></p> <p><b>Emphasise deep learning and experience as an asset when calling for longer term funding</b></p> <p>CMOC 198 – CMOC 201 <sup>39 50 51 76 77 79 87 86 96</sup></p> |

**Table 2** Recommendations for practice (For a full list of CMOCs see Supplementary file 6)

Data regarding getting and keeping members was the most abundant and showed most consensus. As may be expected, boosting the motivation and understanding of potential referrers, while lowering bureaucratic and logistical barriers, was important to getting members (CMOC 10-CMOC 14; CMOC 31-CMOC 46; CMOC64-CMOC 65). Transport from home to venue was particularly

1  
2  
3 key: not just its availability, but people's experiences of the accessibility, appropriateness and  
4 convenience of it (CMOC 10-CMOC 14). Other salient mechanisms involved how respected, valued  
5 and comfortable members felt, or perceived they would feel should they attend: both for  
6  
7 overcoming initial anxiety and stigma and fostering a happy, cohesive group (CMOC 3-CMOC 9;  
8  
9 CMOC 15-CMOC 24; CMOC 53-CMOC 63; CMOC 71-CMOC72). Staff attitudes and a comfortable,  
10  
11 accessible venue play a role in this, but also planned practices, such as involving members in decision  
12  
13 making (CMOC 58-CMOC 63), differentiating activities for need and ability (CMOC 21- CMOC24;  
14  
15 CMOC 66-CMOC 70) and ensuring enough opportunity and time for socialising (reported to be of  
16  
17 high importance to people no matter what the intervention or activity) (CMOC 1-CMOC 2; CMOC 47-  
18  
19 CMOC 52). The stability and reliability of an intervention was also important, though often at odds  
20  
21 with nature of groups run informally with few personnel and unstable income (CMOC 73-CMOC 77).  
22  
23 Overall, ensuring individual wants and needs are met – that people they feel they are gaining  
24  
25 something useful and appropriate to them in particular – was important to keeping members long-  
26  
27 term (CMOC 47-CMOC 72).  
28  
29  
30  
31  
32  
33

34  
35 Data regarding getting and keeping staff and volunteers was least abundant of the four  
36  
37 critical outcome areas, though working with other organisations was frequently alluded to as helpful  
38  
39 in finding personnel (CMOC 78-CMOC 83). Data regarding skills of personnel was largely around the  
40  
41 role of communication and collaboration in creating an encouraging and effective environment for  
42  
43 staff and volunteers (CMOC 84-CMOC 97). Context was key with regards to the availability of  
44  
45 potential volunteers in the local population, as this could be very different depending on location  
46  
47 (e.g. rural or urban), with different likely mechanisms requiring different approaches to finding and  
48  
49 encouraging volunteers from different demographic groups (CMOC 84-CMOC 90). With regard to  
50  
51 keeping volunteers, issues raised included the importance of maintaining work satisfaction and  
52  
53 avoiding burnout, and having financial support available (CMOC 98-CMOC 108).  
54  
55  
56  
57  
58  
59  
60

1  
2  
3 Getting and keeping support of other organisations, such as other community groups, health  
4 and social care services, third sector bodies, local authorities and local businesses was a widely  
5 recurring theme in the data. Actively involving other organisations, minimising overlap, sharing  
6 knowledge and resources and offering something of benefit were all ways to encourage them to feel  
7 invested in supporting an intervention rather than threatened or indifferent to it (CMOC 122-CMOC  
8 131), in addition to pro-active awareness raising and networking (CMOC 110-CMOC 121). Good  
9 collaboration planning, with expert advice on collaborative working and continual attention to  
10 maintaining communication were strategies to avoid problems developing or loss of enthusiasm  
11 with partner organisations (CMOC 138-CMOC 152).

12  
13  
14  
15  
16  
17  
18  
19  
20  
21  
22  
23  
24 On getting and keeping funding and income, salient CMOCs again involved continual  
25 networking and communication, for the reason that this would support multiple mechanisms: by  
26 reducing costs through sharing and partnership; boosting visibility, legitimacy and value in the eyes  
27 of potential and existing funders; and helping to locate more funding and income opportunities  
28 (CMOC 153-CMOC 175; CMOC 185-CMOC 190). Data made some reference to the importance of  
29 strategic planning in finding and managing funds, with outside expertise and dedicated personnel  
30 helpful in carrying this out (CMOC 170-CMOC 175; CMOC 191-CMOC 197). While tailoring an  
31 intervention to national (and therefore funders') priorities may increase its chances of obtaining  
32 funding, this is not always possible or desirable for a group (CMOC 180-CMOC 184). Groups in rural  
33 areas particularly, or experienced groups unable to find anything but short-term solutions, may have  
34 to raise greater awareness with commissioners and policy-makers about the specific challenges that  
35 face them, and lobby for change to ensure better conditions for groups in their situation long term  
36 (CMOC 170-CMOC 179; CMOC 198-CMOC 201). For example rural groups with a small number of  
37 members and personnel can struggle to meet funders demands, especially if put in competition with  
38 larger, well-resourced organisations.

### 58 **Recommendations for policy and commissioning**

59  
60



In addition, 13 recommendations for policy-making and commissioning were also drawn (see Table 3), for the most part mirroring those for practice and drawing on the same CMOCs.

### Recommendations for commissioning/policy-making

**Service users value the social side of an intervention highly, often more than the intervention or activity itself**

CMOC 1 – CMOC 2; CMOC 47 – CMOC 53 <sup>38 40 41 43 44 45 47 48 49 50 52 54 57 58 59 61 62 63 64 65 66 67 68 69 70 71 72 73 74 75</sup>

**Service users need to feel an intervention is "for them" to want to attend and keep attending**

CMOC 15 – CMOC 24; CMOC 66 – CMOC 70 <sup>37 41 43 44 45 46 47 48 49 50 53 56 57 58 59 60 61 62 63 64 65 66 67 69 70 71 72 73 74 75 76 77 78 79 80 81 82 83 84</sup>

**Lack of appropriate transport can be a major barrier to an intervention getting and keeping attendees**

CMOC 26 – CMOC 30; CMOC 65 <sup>36 37 38 44 45 47 48 49 50 56 57 59 60 61 64 65 73 76 77 78 82 85 86</sup>

**Health and social care services that may refer to an intervention need incentive and guidance to do so**

CMOC 42 – CMOC 44; CMOC 134 – CMOC 135 <sup>47 50 61 69 76 77 79 80 88</sup>

**To retain staff and volunteers there needs to be adequate financial support in place for roles and activities**

CMOC 105 – CMOC 109 <sup>50 51 67 73 79 84 87</sup>

**Established community organisations, including local authorities, can offer help in a number of ways to enable small-scale interventions to flourish**

CMOC 115 – CMOC 118 <sup>46 48 52 58 62 65 67 69 71 72 75 76 80 92 93</sup>

**Access to advice on how to create partnerships, collaborate and overcome differences in culture with other organisations can help**

CMOC 143 – CMOC 148 <sup>41 51 59 60 70 76 77 79 86</sup>

**Access to advice on how to effectively plan and network to help find and manage funding and income can help**

CMOC 170 – CMOC 175 <sup>37 46 55 60 61 80 86 91 94</sup>

**Commissioners should be flexible and accommodating of the challenges facing small groups regarding evidence gathering**

CMOC 176 – CMOC 179 <sup>50 84 91</sup>

**Policy makers should ensure policy meets local needs with adequate, protected and accessible resources attached**

CMOC 180 – CMOC 182; CMOC 184 <sup>39 41 42 50 51 55 59 76 77 80 84 86 87 91 95</sup>

**Longer term funding, with simplified application processes, would help smaller initiatives with less capacity to continue**

CMOC 195 – CMOC 197 <sup>70 80 84</sup>

**Longer term funding to support what is already being done will help retain and develop learning and practice on how best to meet local need**

CMOC 198 – CMOC 200 <sup>39 50 51 76 77 79 86 87</sup>

**Authorities and national organisations can help create conditions that encourage support for small initiatives, though policy, leadership and commissioning**

CMOC 132 – CMOC 137 <sup>39 47 50 51 59 69 77</sup>

**Table 3** Recommendations for commissioning/policy-making (For a full list of CMOCs see Supplementary file 6)

The final recommendation covers CMOCs unique to policy-making and commissioning, highlighting issues such as the detrimental effect of a disjoin between national policy and local need on an intervention finding support (as by adhering to one they will neglect the other) (CMOC 132). Practices that could benefit the sustainability of community interventions included ring-fencing

1  
2  
3 funding specifically for dementia-targeted community initiatives; commissioning health and social  
4 care services to work with community initiatives; and developing health pathways around existing  
5 community networks (CMOC 133-CMOC 135). National and official organisations can also encourage  
6 a more strategic, joined up direction regarding community-based dementia support by showing  
7 leadership in working with smaller, local initiatives and support for potential private sector partners  
8 (CMOC 136-CMOC 137).  
9  
10  
11  
12  
13  
14  
15

## 16 **DISCUSSION**

### 17 **Summary of findings**

18  
19  
20  
21  
22  
23 Being able to continually get and hold on to members, staff and volunteers, the support of other  
24 services and organisations, and funding/income are the key factors in the long-term sustainability of  
25 a community-based intervention for people affected by dementia. There are multiple mechanisms  
26 that feed into these sub-outcomes, sensitive to context. Ability to attract members was found to be  
27 driven by perceptions that a group or activity was “for them”, and expectations they would be  
28 welcomed, respected and supported without stigma once attending, as well as having motivated  
29 referrers and low logistical barriers including transport. Members are more likely to keep attending if  
30 feeling comfortable, at home, respected and empowered, with individual needs understood.  
31  
32 Opportunity to socialising was found to be of high importance no matter what intervention type,  
33 with stability and reliability also important. Networking and outreach were found to be important in  
34 getting staff and volunteers; feeling satisfied, valued and supported (including financially) was  
35 important in keeping them. Proactive measures to raise awareness and involve other organisations,  
36 avoiding conflict and sharing knowledge and resources, were found to help in securing essential  
37 support, though requiring significant maintenance through skilled communication, planning and  
38 working practices. Such networking and collaboration was found to be helpful in finding and  
39 securing funding and income, with skilled planning and management of multiple income streams  
40 helpful in sustaining long term. However, the often short term nature of funding was found to be a  
41  
42  
43  
44  
45  
46  
47  
48  
49  
50  
51  
52  
53  
54  
55  
56  
57  
58  
59  
60

1  
2  
3 barrier to retaining deep learning and experience, and disjoins between national policy and local  
4  
5 need a barrier to securing both funding and wider support. Challenges in meeting funders'  
6  
7 requirements and overcoming logistical barriers were especially acute for small-scale and rural  
8  
9 groups.  
10

### 11 12 13 **Strengths and limitations** 14

15  
16 This review was designed to gather evidence regarding how regularly-meeting community-based  
17  
18 interventions for people affected by dementia can be sustained, not on the efficacy/effectiveness of  
19  
20 interventions of this type, hence conclusions regarding the latter are beyond its scope. Literature  
21  
22 was limited as this research question is not commonly the main focus of study in dementia care  
23  
24 research. This meant some CMOCs arrived at were the result of abundant data sources, while others  
25  
26 were not, hence the CMOCs here vary in robustness (see Supplementary file 6). While efforts were  
27  
28 made to exclude data of low rigour (see Supplementary file 3), it is the nature of a realist review to  
29  
30 include data from a variety of source types to build a theoretical model piecemeal; not all of the data  
31  
32 were of equal depth and detail and many will not meet the highest level of empirical rigour, rather  
33  
34 they contribute together in a way that is useful to the theoretical constructs that are the CMOCs and  
35  
36 overall programme theory.<sup>29</sup> The results of this review therefore should be taken as theory and sit in  
37  
38 relation to other research: SCI-Dem provides a theoretical framework which can be put to the test  
39  
40 and further refines by subsequent empirical research.<sup>29</sup> The breadth of intervention types covered in  
41  
42 this review is on the one hand a strength, as it has enabled the surfacing of commonalities in  
43  
44 experience likely relevant to a wide range of real-world initiatives broadly in the same category; on  
45  
46 the other hand, it means this review cannot be specific on certain details. An example is that little  
47  
48 could be concluded on the cost-effectiveness or economic functioning of the interventions covered,  
49  
50 because details were both too scant and too specific to draw robust CMOCs that might usefully be  
51  
52 applicable to others.  
53  
54  
55  
56  
57  
58  
59  
60

1  
2  
3 The practice of one researcher carrying out the bulk of article selection and data analysis,  
4  
5 with a second researcher independently checking 10% at each stage for consistency (along with  
6  
7 regular input and discussion with other members of the research team) is common in realist review,  
8  
9 but nevertheless can be seen as a limitation, as in Cochrane-style systematic reviews double-  
10  
11 screening by two reviewers independently is recommended for greater reliability of results.  
12  
13 However, it should be noted realist review is a theory-driven interpretive approach with significant  
14  
15 differences to more traditional forms of systematic review;<sup>30</sup> i.e. the aim is to develop an evidence-  
16  
17 informed theory rather than a comprehensive summation of all research data available on a  
18  
19 particular research question.  
20  
21  
22  
23

### 24 **Recommendations and comparison with existing literature**

25  
26  
27 Recommendations for practice and policy are presented in Tables 2 and 3 in the results section.  
28  
29 However, they also highlight some common problems for which there may be no easy solution: for  
30  
31 example what to do in rural areas where public transport coverage is poor and potential members  
32  
33 and volunteers are few and widespread, given that transport to venue is a key factor in getting and  
34  
35 keeping members. The issue of whether interventions can be entirely self-sustaining or must rely on  
36  
37 service-level agreements and grant funding is also a key one. This review suggests that costs can be  
38  
39 reduced and income opportunities found by pro-active networking and collaborative working;  
40  
41 though rather than removing the need for grant funding, this is more likely useful in leveraging it,  
42  
43 adding to it and helping it to go further. Recent research into whether social enterprises delivering  
44  
45 adult social care services (not dementia specific) could be self-sustaining suggests that marketing is  
46  
47 key, but needs to focus upon building relationships with stakeholders at multiple levels rather than  
48  
49 adopting an approach akin to selling a product.<sup>97</sup> networking and marketing are closely bound up  
50  
51 with each other. Delivering social quality as well as service quality, having a hybrid workforce and  
52  
53 diverse income streams to strengthen financial viability and reduce reliance on grants were also  
54  
55 found to help.<sup>98</sup> This review echoes all of these points with regards to dementia-targeted  
56  
57  
58  
59  
60

1  
2  
3 community-based interventions, in particular that interventions cannot sustain without a cultivated  
4 support network around them, as well as careful collaborative financial planning and management.  
5  
6  
7

8  
9 The emphasis found in this review on the value to members of social activity and a  
10 respectful, empowering person-centred approach, reinforces the benefits of community-based  
11 initiatives and regular social activity, both for people living with dementia and the people who care  
12 for them.<sup>12 13 14 15 16 17 18 19</sup> However, the time-limited nature of most research in this area is unhelpful  
13 when seeking data on the long-term sustainability of such interventions, with a large number of  
14 articles excluded from this review due to this. Recent systematic reviews have found that  
15 psychosocial interventions tend to be short term, with short-term trials only measuring short-term  
16 impact, and a pressing need for more longer-term studies with larger sample sizes.<sup>14 99</sup> However,  
17 there is a “chicken and egg” problem: if policy and commissioning is hesitant to support  
18 interventions unless there is evidence of robust statistical effects, then such interventions will  
19 struggle to sustain long enough, in enough abundance, to have the numbers to carry out the  
20 research required to produce that evidence. Equally, if research focuses only on  
21 efficacy/effectiveness without attention to the implementation process, and reporting of how costs  
22 were met and resources, personnel, and service users were found, then little can be learnt about  
23 sustaining them.  
24  
25  
26  
27  
28  
29  
30  
31  
32  
33  
34  
35  
36  
37  
38  
39  
40  
41  
42  
43

#### 44 **Future research directions**

45  
46  
47 When drafting inclusion criteria for this review in 2018 it was decided to focus upon interventions  
48 that brought people together to meet physically and socially, as distinct from community services  
49 that go into people’s homes. It did not take into account virtual community activities or communities  
50 at-a-distance, which at the time seemed like a distinct niche. In 2020, however, this kind of activity  
51 became much more important, and integrated with the activities of existing community groups that  
52 met physically prior to the COVID-19 pandemic. With COVID-19 the landscape for community-based  
53  
54  
55  
56  
57  
58  
59  
60

1  
2  
3 interventions has changed significantly, presenting further unprecedented challenges, but the need  
4 for groups that connect people socially remains acute. A recent study by the Alzheimer's Society<sup>11</sup>  
5 revealed COVID-19 restrictions have had particularly negative impacts on the health and well-being  
6 of people affected by dementia and their carers, a finding echoed by the Alzheimer's Disease  
7 International's update report for 2020.<sup>100</sup> Restrictions have forced changes to routine, causing  
8 anxiety and strain in relationships; led to a reduction in skills and confidence; and increased pressure  
9 on home carers, not least through the erosion of support systems.<sup>101</sup> Many support initiatives will  
10 have ceased operating either temporarily or permanently. As the effects of the pandemic continue  
11 to be felt, there is an urgent need for community-based interventions to find ways to keep going or  
12 re-establish quickly when emerging from COVID-19 restrictions. While the data used in this review  
13 predated the pandemic, it can provide a framework for new research to look at what sustainability-  
14 impacting elements have been affected and how. This review presents a theoretical model of the  
15 factors and mechanisms involved in the long term sustainability of community-based interventions.  
16 As such it is for further research to put this model to the test by comparing it empirically with real-  
17 world interventions going forward, which will further refine and add to this programme theory in a  
18 post-pandemic climate.

19  
20  
21  
22  
23  
24  
25  
26  
27  
28  
29  
30  
31  
32  
33  
34  
35  
36  
37  
38  
39  
40  
41  
42 **Word count: 5356**

#### 43 44 45 **Figure legends**

46  
47  
48 **Figure 1** PRISMA flow diagram

49  
50  
51 **Figure 2** Factors affecting the sustainability of community-based groups and activities

#### 52 53 54 **Author affiliations and email**

55  
56  
57 1 Association for Dementia Studies, University of Worcester, Worcester, UK. *t.morton@worc.ac.uk*  
58  
59  
60

1  
2  
3 2 Nuffield Department of Primary Care Health Sciences, University of Oxford, Oxford, UK.

4  
5 *geoffrey.wong@phc.ox.ac.uk*

6  
7  
8 1 Association for Dementia Studies, University of Worcester, Worcester, UK. *t.atkinson@worc.ac.uk*

9  
10  
11 1 Association for Dementia Studies, University of Worcester, Worcester, UK. *d.brooker@worc.ac.uk*

12  
13  
14  
15  
16  
17 **Author Contributions** DB and TA conceptualised the study along with Dr Shirley Evans (Association  
18 for Dementia Studies, University of Worcester) with input from GW, TM and Clive Kennard  
19 (Information specialist, University of Worcester). The study was conducted by DB as principal  
20 investigator, TA as project manager, TM research associate and GW providing methodological  
21 expertise. TM wrote the first draft of this manuscript. GW, DB and TA critically contributed to and  
22 refined this manuscript. All authors have read and approved the final manuscript.  
23  
24  
25  
26  
27  
28  
29

30  
31 **Corresponding Author** Professor Dawn Brooker, Director of the Association for Dementia Studies,  
32 School of Allied Health and Community, University of Worcester, Henwick Grove, Worcester WR2  
33 6AJ. Email: *d.brooker@worc.ac.uk*. Tel: 01905 855250  
34  
35  
36  
37

38 **Twitter** Follow Thomas Morton @ThomasMortonADS  
39

40  
41 **Original protocol:** <http://dx.doi.org/10.1136/bmjopen-2019-032109>

42  
43  
44 **Funding:** This work was supported by The Alzheimer's Society, Grant No: 402, AS-PG-17b-023. Gold  
45 Open Access Article Processing Charges met by the University of Worcester.  
46  
47

48  
49 **Acknowledgements** This project was funded by the Alzheimer's Society. Dr Shirley Evans  
50 (Association for Dementia Studies, University of Worcester) contributed to the writing of the  
51 protocol for this review. Clive Kennard (information specialist, University of Worcester), helped  
52 design, pilot and carry out the formal search. The authors would like to thank all those who shared  
53 their invaluable experience and contributed to advising and guiding this project as a stakeholder  
54  
55  
56  
57  
58  
59  
60

1  
2  
3 consultant: Alzheimer's Society research monitors Sue Comely, Maggie Ewer and Mair Graham;  
4  
5 Philly Hare, Rachael Litherland, Damian Murphy and Rachel Niblock of DEEP/Innovations in  
6  
7 Dementia, and all who attended the national meeting of DEEP groups at Woodbrooke,  
8  
9 Birmingham, July 2019; Teresa 'Dory' Davies, James McKillop and Dreane Williams of DEEP; Judith  
10  
11 Baron and the Face It Together DEEP group; Jill Turley and The Buddies DEEP group; the Friends for  
12  
13 Life DEEP group; Kim Badcock of Kim's Cafe (Denmead, Havant and Waterlooville, Hampshire); Jo  
14  
15 Barrow and the Forget Me Not Lunch and Friendship Club (Bicester, Oxfordshire); Elizabeth Bartlett  
16  
17 of the Laverstock Memory Support Group (Wiltshire); Shirley Bradley of Friends of the Elderly  
18  
19 (Worcester); David Budd of Our Connected Neighbourhoods (Stirling); Di Burbidge of Liverpool DAA  
20  
21 Diversity Sub-Group and Chinese Wellbeing (Liverpool); Kishwar Butt of the South Asian Ladies'  
22  
23 Milaap Group (Wolverhampton); Michelle Candlish of Ceartas Advocacy (Kirkintilloch, East  
24  
25 Dunbartonshire); Annette Darby of Brierly Hill Health and Social Care Centre (West Midlands); Sue  
26  
27 Denman of Solva Care (Haverfordwest); Gerry Fouracres of Scrubditch Farm (Cirencester); Graham  
28  
29 Galloway of Kirrie Connections (Kirriemuir, Angus); Reinhard Guss; Deborah Harrold of Agewell CIC  
30  
31 (Oldbury, West Midlands); June Hennell; Jacoba Huizenga of Health and Social Care in Communities,  
32  
33 Utrecht (Netherlands); Lynden Jackson of the Debenham Project (Suffolk); Ghazal Mazloumi of Trent  
34  
35 Dementia Services Development Centre; Cheryl Poole of Leominster Meeting Centre; Anita  
36  
37 Tomaszewski and Jennifer Williams of Me, Myself and I (Briton Ferry, Neath Port Talbot); Dame  
38  
39 Louise Robinson; Droitwich Meeting Centre; Leominster Meeting Centre; the members of the  
40  
41 UKMCSP National Reference Group; and Jennifer Bray, Shirley Evans, Nicola Jacobson-Wright, Chris  
42  
43 Russell and Mike Watts of the Association for Dementia Studies, University of Worcester.

44  
45  
46  
47  
48  
49  
50 **Competing interests** Geoffrey Wong is Deputy Chair of the National Institute for Health Research  
51  
52 Health Technology Assessment Prioritisation Committee: Integrated Community Health and Social  
53  
54 Care (A).  
55  
56  
57  
58  
59  
60



**Disclaimer** The views and opinions expressed therein are those of the authors and do not necessarily reflect those of the Alzheimer's Society.

**Ethics approval** This project has been reviewed by the University of Worcester College of Health, Life and Environmental Sciences Research Ethics Panel.

**PROSPERO registration number** CRD42019125889.

**Data availability statement** This study was a qualitative review of secondary data, hence no new primary dataset was generated. However, we can share more information on what data was extracted and how it was analysed if requested. Please contact Thomas Morton at [t.morton@worc.ac.uk](mailto:t.morton@worc.ac.uk), ORCID 0000-0001-8264-0834

**Open Access** This is an Open Access article distributed in accordance with the terms of the Creative Commons Attribution (CC BY 4.0) license, which permits others to distribute, remix, adapt and build upon this work, for commercial use, provided the original work is properly cited. See: <http://creativecommons.org/licenses/by/4.0/>

## REFERENCES

1. World Health Organisation. *Global action plan on the public health response to dementia 2017-2025*. Geneva: world Health Organisation, 2017. [https://www.who.int/mental\\_health/neurology/dementia/action\\_plan\\_2017\\_2025/en/](https://www.who.int/mental_health/neurology/dementia/action_plan_2017_2025/en/)
2. Office for National Statistics (ONS). *Living longer: Caring in later life*. London: ONS, 2019. <https://www.ons.gov.uk/peoplepopulationandcommunity/birthsdeathsandmarriages/ageing/articles/livinglongerhowourpopulationischangingandwhyitmatters/2019-03-15>
3. Care Quality Commission. *The state of health care and adult social care in England 2018/19*. Newcastle-upon-Tyne: Care Quality Commission, 2019. [https://www.cqc.org.uk/sites/default/files/20191015b\\_stateofcare1819\\_fullreport.pdf](https://www.cqc.org.uk/sites/default/files/20191015b_stateofcare1819_fullreport.pdf)
4. Department of Health. *Prime Minister's challenge on dementia 2020*. London: Department of Health, 2015. [https://assets.publishing.service.gov.uk/government/uploads/system/uploads/attachment\\_data/file/414344/pm-dementia2020.pdf](https://assets.publishing.service.gov.uk/government/uploads/system/uploads/attachment_data/file/414344/pm-dementia2020.pdf)
5. Incisive Health. *Care deserts: the impact of a dysfunctional market in adult social care provision*. London: Incisive Health, 2019: <https://www.incisivehealth.com/wp-content/uploads/2019/05/care-deserts-age-uk-report.pdf>
6. Age UK. *Briefing: Health and Care of Older People in England 2019*. London: Age UK, 2019. [https://www.ageuk.org.uk/globalassets/age-uk/documents/reports-and-publications/reports-and-briefings/health--wellbeing/age\\_uk\\_briefing\\_state\\_of\\_health\\_and\\_care\\_of\\_older\\_people\\_july2019.pdf](https://www.ageuk.org.uk/globalassets/age-uk/documents/reports-and-publications/reports-and-briefings/health--wellbeing/age_uk_briefing_state_of_health_and_care_of_older_people_july2019.pdf)

- 1
  - 2
  - 3
  - 4
  - 5
  - 6
  - 7
  - 8
  - 9
  - 10
  - 11
  - 12
  - 13
  - 14
  - 15
  - 16
  - 17
  - 18
  - 19
  - 20
  - 21
  - 22
  - 23
  - 24
  - 25
  - 26
  - 27
  - 28
  - 29
  - 30
  - 31
  - 32
  - 33
  - 34
  - 35
  - 36
  - 37
  - 38
  - 39
  - 40
  - 41
  - 42
  - 43
  - 44
  - 45
  - 46
  - 47
  - 48
  - 49
  - 50
  - 51
  - 52
  - 53
  - 54
  - 55
  - 56
  - 57
  - 58
  - 59
  - 60
7. Alzheimer's Society. *A lonely future: 120,000 people with dementia living alone, set to double in the next 20 years*. London: Alzheimer's Society, 2019. <https://www.alzheimers.org.uk/news/2019-05-15/lonely-future-120000-people-dementia-living-alone-set-double-next-20-years>
8. Cornwell EY, Waite, LJ. Social disconnectedness, perceived isolation and health among older adults. *J Health Soc Behav* 2009;50(1):31–48. doi.org/10.1177/002214650905000103
9. Holt-Lunstad J, Smith TB, Baker M, Harris T, Stephenson D. Loneliness and social isolation as risk factors for mortality: A meta-analytic review. *Perspect Psychol Sci* 2015;10(2):227–237. doi.org/10.1177/1745691614568352
10. Brodaty H, Donkin M. Family carers of people with dementia. *Dialogues Clin Neurosci* 2009;11(2):217–228.
11. Alzheimer's Society. *Worst hit: Dementia during coronavirus*. London: Alzheimer's Society, 2020. <https://www.alzheimers.org.uk/sites/default/files/2020-09/Worst-hit-Dementia-during-coronavirus-report.pdf>
12. Brooker D, Evans SC, Evans SB, et al. Evaluation of the implementation of the Meeting Centres Support Program in Italy, Poland, and the UK; exploration of the effects on people with dementia. *Int J Geriatr Psychiatry* 2018;33(7):883-892. doi: 10.1002/gps.4865.
13. Evans SB, Evans SC, Brooker D, et al. The impact of the implementation of the Dutch combined Meeting Centres Support Programme for family caregivers of people with dementia in Italy, Poland and UK. *Aging Ment Health* 2018; doi: 10.1080/13607863.2018.1544207
14. Lord K, Beresford-Dent J, Rapaport P, et al. Developing the New Interventions for Independence in Dementia Study (NIDUS) theoretical model for supporting people to live well with dementia at home for longer: a systematic review of theoretical models and Randomised Controlled Trial evidence. *Soc Psychiatry Psychiatr Epidemiol* 2019;doi: 10.1007/s00127-019-01784-w
15. McDermott O, Charlesworth G, Hogervorst E, et al. Psychosocial interventions for people with dementia: a synthesis of systematic reviews. *Aging Ment Health* 2019;23(4):393–403. doi: 10.1080/13607863.2017.1423031
16. Van't Leven N, Prick AE, Groenewoud JG, et al. Dyadic interventions for community-dwelling people with dementia and their family caregivers: a systematic review. *Int Psychogeriatr* 2013;25(10):1581-1603.
17. Dröes RM, Van Mierlo LD, Meiland FJM, Van der Roest HG. Memory problems in dementia: Adaptation and coping strategies, and psychosocial treatments. *Expert Rev Neurother* 2011;11(12):1769-1782.
18. Dröes RM, Meiland F, Schmitz MJ, Van Tilburg W. Effect of combined support for people with dementia and carers versus regular day care on behaviour and mood of persons with dementia: Results from a multi-centre implementation study. *Int J Geriatr Psychiatry* 2004;19(7):673-684.
19. Dröes RM, Meiland FJM, Schmitz MJ, Van Tilburg W. Effect of the Meeting Centres Support Program on informal carers of people with dementia: Results from a multi-centre study. *Aging Ment Health* 2006;10(2):112-124.
20. Wittenberg R, Hu B, Barraza-Araiza L, Rehill A. *Projections of older people with dementia and costs of dementia care in the United Kingdom, 2019-2040 (CPEC Working Paper 50)*. London: LSE, 2019. [https://www.alzheimers.org.uk/sites/default/files/2019-11/cpec\\_report\\_november\\_2019.pdf](https://www.alzheimers.org.uk/sites/default/files/2019-11/cpec_report_november_2019.pdf)
21. Dröes RM, Breebaart E, Meiland FJ, et al. Effect of Meeting Centres Support Program on feelings of competence of family carers and delay of institutionalization of people with dementia. *Aging Ment Health* 2004;8(3):201-211. doi.org/10.1080/13607860410001669732
22. Dröes RM, Meiland FJM, Schmitz M, van Tilburg W. Effect of combined support for people with dementia and carers versus regular day care on behaviour and mood of persons with dementia: results from a multicentre implementation study. *Int J Geriatr Psychiatry* 2004;19:1-12.
23. Booth A, Clarke M, Ghersi D, et al. An international registry of systematic-review protocols. *Lancet* 2011;377:108–9.
24. Morton T, Atkinson T, Brooker D, et al. Sustainability of community-based interventions for people affected by dementia: a protocol for the SCI-Dem realist review. *BMJ Open* 2019;9:e032109. doi: 10.1136/bmjopen-2019-032109
25. Pawson R. *Evidence-based Policy: A Realist Perspective*. London: Sage Publications, 2006.
26. Pawson R, Greenhalgh T, Harvey G, Walshe K. Realist review – a new method of systematic review designed for complex policy interventions. *J Health Serv Res Policy* 2005;10(1):21-24.
27. Jagosh J, Macaulay AC, Salsberg J, et al. Uncovering the benefits of participatory research: implications of a realist review for health research and practice. *Milbank Q* 2012;90:311–46.
28. Astbury B, Leeuw F. Unpacking black boxes: mechanisms and theory building in evaluation. *Am J Eval* 2010;31:363–81.

- 1
  - 2
  - 3
  - 4
  - 5
  - 6
  - 7
  - 8
  - 9
  - 10
  - 11
  - 12
  - 13
  - 14
  - 15
  - 16
  - 17
  - 18
  - 19
  - 20
  - 21
  - 22
  - 23
  - 24
  - 25
  - 26
  - 27
  - 28
  - 29
  - 30
  - 31
  - 32
  - 33
  - 34
  - 35
  - 36
  - 37
  - 38
  - 39
  - 40
  - 41
  - 42
  - 43
  - 44
  - 45
  - 46
  - 47
  - 48
  - 49
  - 50
  - 51
  - 52
  - 53
  - 54
  - 55
  - 56
  - 57
  - 58
  - 59
  - 60
29. Pawson R, Greenhalgh T, Harvey G, *et al.* *Realist Synthesis – An Introduction*. ESRC Working Paper Series. London: ESRC, 2004.
30. Wong G, Greenhalgh T, Westhrop G, Pawson R. Development of methodological guidance, publication standards and training materials for realist and meta-narrative reviews: the RAMESES (Realist And Meta-narrative Evidence Syntheses - Evolving Standards) project. *Health Serv Deliv Res* 2014;2(30):1-252.
31. DEEP. *DEEP: The UK Network of Dementia Voices* website. 2020.<http://dementivoices.org.uk>
32. Greenhalgh T, Peacock R. Effectiveness and efficiency of search methods in systematic reviews of complex evidence: audit of primary sources. *BMJ* 2005;331:1064.
33. Booth A, Harris J, Croot E, *et al.* Towards a methodology for cluster searching to provide conceptual and contextual “richness” for systematic reviews of complex interventions: case study (CLUSTER). *BMC Med Res Methodol* 2013;13:118.
34. Wong G. Data gathering in realist reviews: Looking for needles in haystacks. In: Emmel, N, Greenhalgh J, Manzano A, *et al.* (eds.) *Doing Realist Research*. London: Sage Publications, 2018:131-145.
35. Pawson R. Digging for nuggets: How ‘bad’ research can yield ‘good’ evidence. *Int J Soc Res Methodol* 2006;9(2):127-142.
36. Actifcare. *Best practice recommendations from the Actifcare study: Access to community care services for home-dwelling people with dementia and their carers*.[www.actifcare.eu](http://www.actifcare.eu). Bangor: Dementia Services Development Centre Wales, 2017.[http://dsdc.bangor.ac.uk/documents/ShortversionBestPracticeRecommendationwithoutsupportingfindings\\_000.pdf](http://dsdc.bangor.ac.uk/documents/ShortversionBestPracticeRecommendationwithoutsupportingfindings_000.pdf)
37. Daykin N, Julier G, Tomlinson A, *et al.* *Review of the grey literature: music, singing and wellbeing*. London: What Works Wellbeing, 2016. <https://whatworkswellbeing.files.wordpress.com/2016/11/grey-literature-review-music-singing-wellbeing-nov2016.pdf>
38. Hochgraeber I, Kutzleben MV, Bartholomeyczik S, Holle B. Low-threshold support services for people with dementia within the scope of respite care in Germany – A qualitative study on different stakeholders’ perspective. *Dementia* 2015;16(5):576-590. doi:10.1177/1471301215610234
39. McDonald A, Heath B. Developing services for people with dementia. *Work Older People* 2009;13(3):18-21. doi:10.1108/13663666200900045
40. Strandenæs MG, Lund A, Rokstad AM. Experiences of attending day care services designed for people with dementia – a qualitative study with individual interviews. *Aging Ment Health* 2017;22(6):764-772. doi:10.1080/13607863.2017.1304892
41. Van Mierlo L, Chattat R, Evans S, *et al.* Facilitators and barriers to adaptive implementation of the Meeting Centers Support Program (MCSP) in three European countries; the process evaluation within the MEETINGDEM study. *Int Psychogeriatr* 2017;30(4):527-537. doi:10.1017/s1041610217001922
42. Brooker D, Evans SB, Evans SC, *et al.* *Meeting Centres Support Programme UK: Overview, evidence and getting started*. Worcester: Association for Dementia Studies, University of Worcester, 2017. <https://www.worcester.ac.uk/documents/Meeting-Centres-Support-Programme-Overview-evidence-and-getting-started-Conference-booklet.pdf>
43. Glover C. *Running self-help groups in sheltered and extra care accommodation for people who live with dementia*. London: Mental Health Foundation, 2014. <https://www.mentalhealth.org.uk/sites/default/files/dementia-self-help-guide.pdf>
44. Reichet M, Wolter V. *Sport for People With Dementia – Implementing Physical Activity Programs (PAP) For People With Dementia: Results From A German Study (conference poster)*. Dortmund: TU Dortmund University, 2017.
45. Reichet M, Wolter V. Implementing physical activity programs for people with dementia: Results from a German study. *Innov Aging* 2017;1(Suppl\_1):340-340. doi:10.1093/geroni/igx004.1247
46. The Me Myself and I Club. *The Me, Myself and I Club, Briton Ferry: A case study in warm humanity and meaningful co-production*. Neath Port Talbot: The Me Myself and I Club, 2018. <https://info.copronet.wales/me-myself-and-i-club-briton-ferry/>
47. Older People’s Commissioner for Wales. *Rethinking respite for people affected by dementia*. Cardiff: Older People’s Commissioner for Wales, 2018. <http://www.olderpeoplewales.com/en/Reviews/respit.aspx>
48. Bould E, McFayden S, Thomas C. *Dementia-friendly sport and physical activity guide*. London: Alzheimer’s Society, 2019. <https://www.alzheimers.org.uk/get-involved/dementia-friendly-communities/organisations/dementia-friendly-sports>
49. Green G, Lakey L. *Building dementia-friendly communities: a priority for everyone*. London: Alzheimer’s Society, 2013.[https://actonalz.org/sites/default/files/documents/Dementia\\_friendly\\_communities\\_full\\_report.pdf](https://actonalz.org/sites/default/files/documents/Dementia_friendly_communities_full_report.pdf)
50. Marshall J, Jackson L. *Encouraging and supporting the growth of “dementia proactive communities”*. Ipswich: Sue Ryder/The Debenham Project, 2015. <http://www.the-debenham->

- project.org.uk/downloads/conference/Supplementary%20contributions/Lynden%20Jackson%20&%20Jo%20Marshall/Lynden%20Jackson%20&%20Jo%20Marshall%20-%20Supplementary%20Contribution.pdf
51. Clarke CL, Keyes SE, Wilkinson H, *et al*. Organisational space for partnership and sustainability: Lessons from the implementation of the National Dementia Strategy for England. *Health Soc Care Community* 2014;22(6):634-645. doi:10.1111/hsc.12134
  52. Health Innovation Network South London. *Case Study: Dulwich Helpline and Southwark Churches Care (DH&SCC) – The Dementia Project, Southwark, South London*. London: Health Innovation Network South London, 2015. [http://www.hin-southlondon.org/system/resources/resources/000/000/083/original/Case\\_Study\\_The\\_Healthy\\_Living\\_Club.pdf?1426083299](http://www.hin-southlondon.org/system/resources/resources/000/000/083/original/Case_Study_The_Healthy_Living_Club.pdf?1426083299)
  53. La Rue A, Felten K, Turkstra L. Intervention of multi-modal activities for older adults with dementia translation to rural communities. *Am J Alzheimers Dis Other Demen* 2015; 30(5):468-477. doi:10.1177/1533317514568888
  54. Mason T, Slack G. *The Debenham Project: Research into the dementia/memory loss journey for cared-for and carer, 2012-13*. Norwich: Norfolk & Suffolk Dementia Alliance, 2013. [http://www.the-debenham-project.org.uk/downloads/articles/2014/DebProjResearch\\_Final\\_Report\\_311013.pdf](http://www.the-debenham-project.org.uk/downloads/articles/2014/DebProjResearch_Final_Report_311013.pdf)
  55. Meiland FJ, Dröes RM, Lange J, Vernooij-Dassen M. Development Of A Theoretical Model For Tracing Facilitators And Barriers In Adaptive Implementation Of Innovative Practices In Dementia Care. *Arch Gerontol Geriatr* 2004;38:279-290. doi:10.1016/j.archger.2004.04.038
  56. Solutions Research. *Public perceptions and experiences of community-based end of life care initiatives: a qualitative research report*. London: Public Health England, 2016. [https://assets.publishing.service.gov.uk/government/uploads/system/uploads/attachment\\_data/file/569711/Public\\_Perceptions\\_of\\_Community\\_Based\\_End\\_of\\_Life\\_Care\\_Initiatives\\_Research.pdf](https://assets.publishing.service.gov.uk/government/uploads/system/uploads/attachment_data/file/569711/Public_Perceptions_of_Community_Based_End_of_Life_Care_Initiatives_Research.pdf)
  57. Cahill S, Pierce M, Bobersky A. *An evaluation report on flexible respite options of the Living Well With Dementia project in Stillorgan and Blackrock*. Dublin: Trinity College, 2014. [http://dementia.ie/images/uploads/site-images/Evaluation\\_Flexible\\_Respite\\_Options.pdf](http://dementia.ie/images/uploads/site-images/Evaluation_Flexible_Respite_Options.pdf)
  58. Carone L, Tischler V, Denning T. Football and dementia: A qualitative investigation of a community based sports group for men with early onset dementia. *Dementia* 2016;15(6):1358-1376. doi:10.1177/1471301214560239
  59. Gajardo J, Aravena JM, Budinich M, *et al*. The Kintun program for families with dementia: From novel experiment to national policy (innovative practice). *Dementia* 2017;19(2):488-495. doi:10.1177/1471301217721863
  60. Grinberg A, Lagunoff J, Phillips D, *et al*. Multidisciplinary design and implementation of a day program specialized for the frontotemporal dementias. *Am J Alzheimers Dis Other Demen* 2008;22(6):499-506. doi:10.1177/1533317507308780
  61. Meiland FJ, Dröes RM, Lange JD, Vernooij-Dassen MJ. Facilitators and barriers in the implementation of the meeting centres model for people with dementia and their carers. *Health Policy* 2005;71(2):243-253. doi:10.1016/j.healthpol.2004.08.011
  62. Rio R. A Community-Based Music Therapy Support Group for People With Alzheimer's Disease and Their Caregivers: A Sustainable Partnership Model. *Front Med* 2018;5. doi:10.3389/fmed.2018.00293
  63. Gottleib-Tanaka D. *Creative expression, dementia and the therapeutic environment (PhD Thesis)*. Vancouver: University of British Columbia, 2006. <https://open.library.ubc.ca/cIRcle/collections/ubctheses/831/items/1.0076821>
  64. Mapes N, Milton S, Nicholls V, Williamson T. *Is it nice outside? Consulting people living with dementia and their carers about engaging with the natural environment*. Natural England Commissioned Reports, Number 211. York: Natural England, 2016. <http://publications.naturalengland.org.uk/publication/5910641209507840>
  65. Brataas HV, Bjugan H, Wille T, Hellzen O. Experiences of day care and collaboration among people with mild dementia. *J Clin Nurs* 2010;19(19-20):2839-2848. doi:10.1111/j.1365-2702.2010.03270.x
  66. Casey J. Early Onset Dementia: Getting Out and About. *Journal of Dementia Care* July/August 2004;12(4):12-13.
  67. Oliver-Watkins F, Kendall N, Matthews T. *Sow & Grow: Report from a two-year Social and Therapeutic Horticultural (STH) programme delivering table-top gardening courses to adults in the community aged 50 and over*. Reading: Thrive, 2016.
  68. Williams B, Roberts P. Friends in passing: Social interaction at an adult day care center. *Int J Aging Hum Dev* 1995;41(1):63-78. doi:10.2190/ghhw-v1qr-nacx-vbcb
  69. Alzheimer's Australia. *The benefits of physical activity and exercise for people living with dementia (Discussion paper 11)*. Sydney: Alzheimer's Australia, 2014. [https://www.dementia.org.au/sites/default/files/NSW/documents/AANSW\\_DiscussionPaper11.pdf](https://www.dementia.org.au/sites/default/files/NSW/documents/AANSW_DiscussionPaper11.pdf)

- 1  
2  
3  
4  
5  
6  
7  
8  
9  
10  
11  
12  
13  
14  
15  
16  
17  
18  
19  
20  
21  
22  
23  
24  
25  
26  
27  
28  
29  
30  
31  
32  
33  
34  
35  
36  
37  
38  
39  
40  
41  
42  
43  
44  
45  
46  
47  
48  
49  
50  
51  
52  
53  
54  
55  
56  
57  
58  
59  
60
70. Hayes R, Williamson M. *Men's Sheds: Exploring the Evidence for Best Practice*. Melbourne: La Trobe University, 2007. <https://www.researchgate.net/publication/259313489>
  71. Milligan C, Payne S, Bingley A, Cockshott Z. Place and wellbeing: Shedding light on activity interventions for older men. *Ageing Soc* 2013;35(1):124-149. doi:10.1017/s0144686x13000494
  72. Tuppen J. The benefits of groups that provide cognitive stimulation for people with dementia. *Nurs Older People* 2012;24(10):20-24. doi:10.7748/nop2012.12.24.10.20.c9437
  73. Mental Health Foundation. *An evaluation of the Standing Together project*. London: Mental Health Foundation, 2018. <https://www.mentalhealth.org.uk/sites/default/files/standing-together-evaluation-WEB.pdf>
  74. Thrive. *GrowingAlife - A Thrive Community Gardening Project: A practical guide to setting up a community gardening project for people affected by mental ill health*. Reading: Thrive, 2012. <https://www.lumi.org.uk/assets/resources-toolkits/event-and-projects/G4L-Resource-Book.pdf>
  75. Tuppen J, Burton-Jones J. Cogs Clubs: a helpful activity in early dementia. *Journal of Dementia Care* September/October 2015;23(5):20-21.
  76. Dean J, Silversides K, Crampton J, Wrigley J. *Evaluation of the Bradford Dementia Friendly Communities Programme*. York: Joseph Rowntree Foundation, 2015. <https://www.jrf.org.uk/report/evaluation-bradford-dementia-friendly-communities-programme>
  77. Dean J, Silversides K, Crampton J, Wrigley J. *Evaluation of the York Dementia Friendly Communities Programme*. York: Joseph Rowntree Foundation, 2015. <https://www.jrf.org.uk/report/evaluation-york-dementia-friendly-communities-programme>
  78. Noimuenwai P. *Effectiveness of adult day care programs on health outcomes of Thai family caregivers of persons with dementia (PhD Thesis)*. Kansas: University of Kansas, 2012. [https://kuscholarworks.ku.edu/bitstream/handle/1808/11440/Noimuenwai\\_ku\\_0099D\\_12475\\_DATA\\_1.pdf?sequence=1&isAllowed=y](https://kuscholarworks.ku.edu/bitstream/handle/1808/11440/Noimuenwai_ku_0099D_12475_DATA_1.pdf?sequence=1&isAllowed=y)
  79. Van Haefen-Van Dijk A, Meiland F, Mierlo LV, Dröes RM. Transforming nursing home-based day care for people with dementia into socially integrated community day care: Process analysis of the transition of six day care centres. *Int J Nurs Stud* 2015;52(8), 1310-1322. doi:10.1016/j.ijnurstu.2015.04.009
  80. Health Innovation Network South London. *Peer Support for People with Dementia Resource Pack*. London: Health Innovation Network South London, 2015. <https://dementiapartnerships.com/resource/dementia-peer-support-resource-pack/>
  81. Hikichi H, Kondo K, Takeda T, Kawachi I. Social interaction and cognitive decline: Results of a 7-year community intervention. *Alzheimers Dement (N Y)* 2017;3:23-32. doi:10.1016/j.trci.2016.11.003
  82. Hochgraeber I, Bartholomeyczik S, Holle B. Low-threshold support for families with dementia in Germany. *BMC Res Notes* 2012;5(1). doi:10.1186/1756-0500-5-317
  83. La Rue A, Felten K, Duschene K, et al. Language-enriched exercise plus socialization for older adults with dementia: Translation to rural communities. *Semin Speech Lang* 2013;34(03):170-184. doi:10.1055/s-0033-1358370
  84. Lockwood S. *The Debenham Project: A case study of a unique community-led and owned project dedicated to the support of carers of those that have symptoms of dementia and those they care for*. Harrogate: Community Catalysts CIC, 2012. <http://www.the-debenham-project.org.uk/downloads/articles/2012/121106report.pdf>
  85. Health Innovation Network South London. *Case Study: The Healthy Living Club (HLC) – A self-directed, dementia-centred community group in Stockwell, London*. London: Health Innovation Network South London, 2015. [http://www.hin-southlondon.org/system/resources/resources/000/000/084/original/Case\\_Study\\_The\\_Dulwich\\_Helpline\\_and\\_Southwark\\_Churches.pdf?1426083406](http://www.hin-southlondon.org/system/resources/resources/000/000/084/original/Case_Study_The_Dulwich_Helpline_and_Southwark_Churches.pdf?1426083406)
  86. Mangiaracina F, Chattat R, Farina E, et al. Not re-inventing the wheel: The adaptive implementation of the meeting centres support programme in four European countries. *Ageing Ment Health* 2016;21(1):40-48. doi:10.1080/13607863.2016.1258540
  87. Jackson L. *The Debenham Project: Project Blog and Catch-Up (August 2017)*. Debenham, Suffolk: The Debenham Project, 2017. <http://www.the-debenham-project.org.uk/downloads/newsletters/blogs/1708.pdf>
  88. McAiney CA, Hillier LM, Stolee P, et al. 'Throwing a lifeline': The role of First Link™ in enhancing support for individuals with dementia and their caregivers. *Neurodegener Dis Manag* 2012;2(6):623-638. doi:10.2217/nmt.12.66
  89. Moore KD. Observed affect in a dementia day center: Does the physical setting matter? *Alzheimers Care Q* 2002;3(1):67-73.

- 1  
2  
3  
4  
5  
6  
7  
8  
9  
10  
11  
12  
13  
14  
15  
16  
17  
18  
19  
20  
21  
22  
23  
24  
25  
26  
27  
28  
29  
30  
31  
32  
33  
34  
35  
36  
37  
38  
39  
40  
41  
42  
43  
44  
45  
46  
47  
48  
49  
50  
51  
52  
53  
54  
55  
56  
57  
58  
59  
60
90. Arthur A, Buckner S, Buswell M, *et al.* *DEMCOM: National Evaluation of Dementia Friendly Communities (Executive Summary)*. Cambridge: Applied Research Collaboration (ARC) East of England, 2020.
  91. Kelsey SG, Laditka SB. Evaluating best practices for social model programs for adults with Alzheimer's disease in South Carolina. *Home Health Care Serv Q* 2006;24(4):21-46. doi:10.1300/j027v24n04\_02
  92. Arkin SM, Morrow-Howell N. Elder Rehab: A student-supervised exercise program for Alzheimer's patients. *Gerontologist* 1999;39(6):729-735. doi:10.1093/geront/39.6.729
  93. LeBlanc LA. Integrating behavioral psychology services into adult day programming for individuals with dementia. *BehavModif* 2010;34(5):443-458. doi:10.1177/0145445510383528
  94. NCVO. *How To Fundraise In Tough Times*. London: NCVO, 2019. <https://knowhow.ncvo.org.uk/how-to/how-to-fundraise-in-tough-times>
  95. Wimo A, Wallin J, Lundgren K, *et al.* Impact of day care on dementia patients—costs, well-being and relatives' views. *Fam Pract* 1990;7(4):279-287. doi:10.1093/famp/7.4.279
  96. Shnall A, Agate A, Grinberg A, *et al.* Development of supportive services for frontotemporal dementias through community engagement. *Int Rev Psychiatry* 2013;25(2):246-252. doi:10.3109/09540261.2013.767780
  97. Powell M, Osborne SP. Social enterprises, marketing, and sustainable public service provision. *International Review of Administrative Sciences* 2020;86(1):62-79. doi:10.1177/0020852317751244
  98. Powell M, Gillett A, Doherty B. Sustainability in social enterprise: hybrid organizing in public services. *Public Management Review* 2019;21(2):159-186. doi:10.1080/14719037.2018.1438504
  99. Oyeboode JR, Parveen S. Psychosocial interventions for people with dementia: An overview and commentary on recent developments. *Dementia* 2019;18(1):8–35. doi: 10.1177/1471301216656096
  100. Barbarino P, Lynch C, Bliss A, *et al.* *From Plan to Impact III: Maintaining dementia as a priority in unprecedented times*. London: Alzheimer's Disease International, 2020. <https://www.alzint.org/u/from-plan-to-impact-2020.pdf>
  101. Canevelli M, Valletta M, Toccaceli Blasi M, *et al.* Facing Dementia During the COVID-19 Outbreak. *J Am Geriatr Soc* 2020;68(8):1673–1676. <https://doi.org/10.1111/jgs.16644>



1  
2  
3  
4  
5  
6  
7  
8  
9  
10  
11  
12  
13  
14  
15  
16  
17  
18  
19  
20  
21  
22  
23  
24  
25  
26  
27  
28  
29  
30  
31  
32  
33  
34  
35  
36  
37  
38  
39  
40  
41  
42  
43  
44  
45  
46  
47  
48  
49  
50  
51  
52  
53  
54  
55  
56  
57  
58  
59  
60

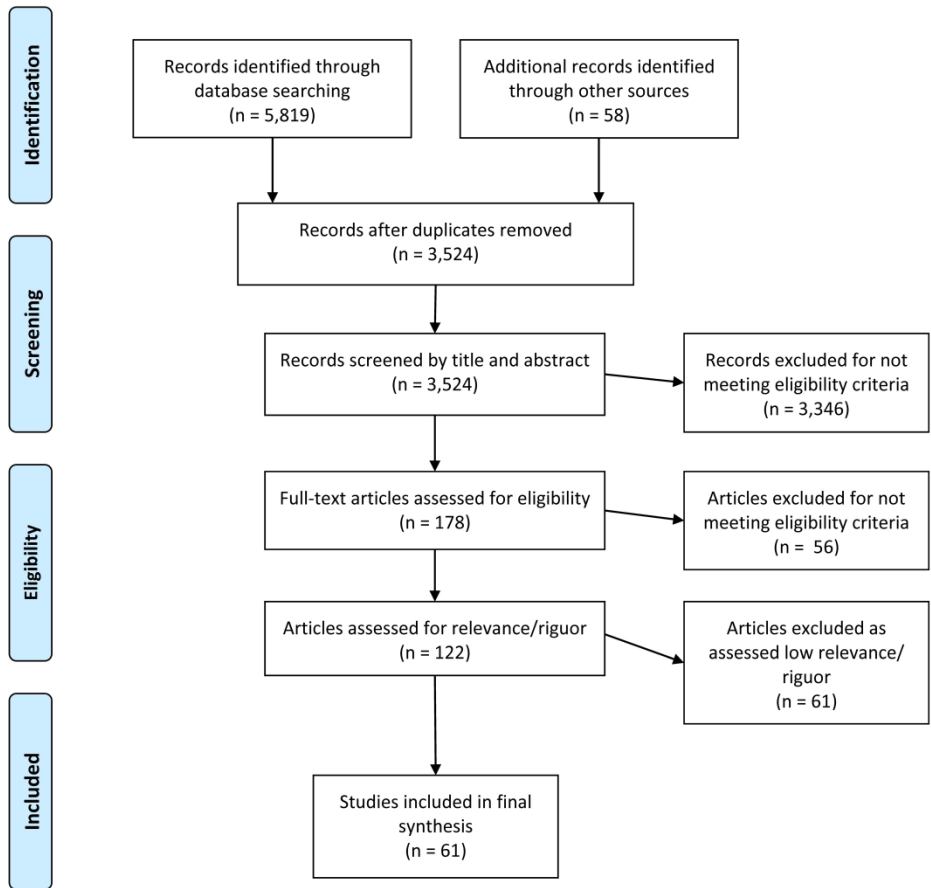

Figure 1 PRISMA flow diagram

133x130mm (1200 x 1200 DPI)

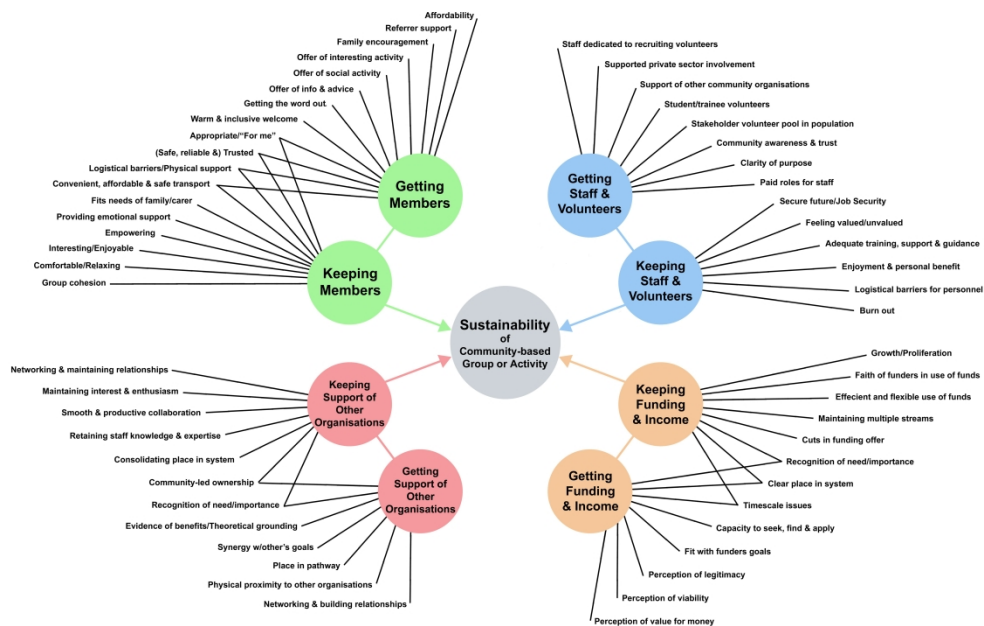

Figure 2 Factors affecting the sustainability of community-based groups and activities

164x106mm (1200 x 1200 DPI)



## Supplementary file 1: Initial programme theory diagrams and coding themes

### Key to colour coding:

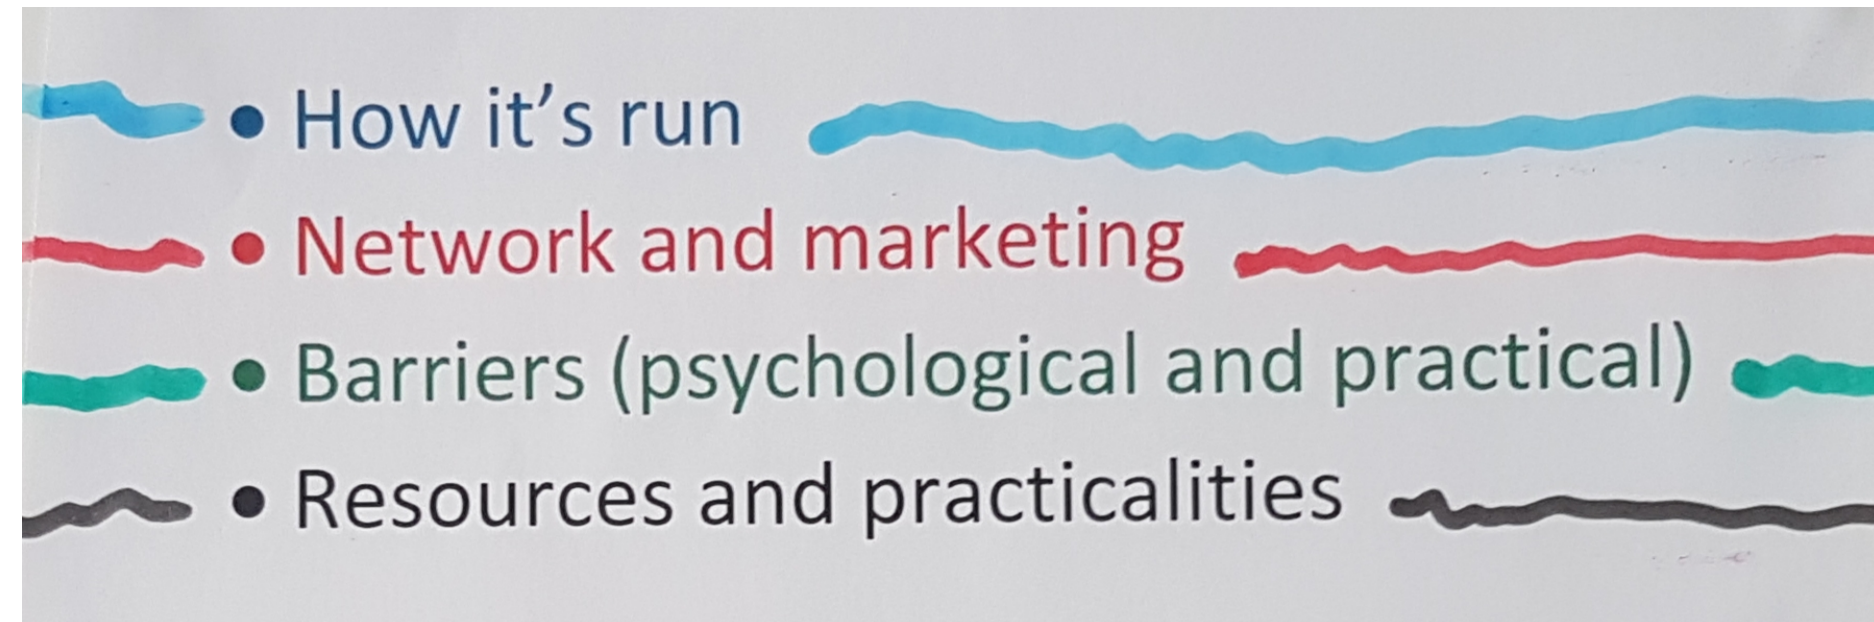

Barriers and facilitators to engagement

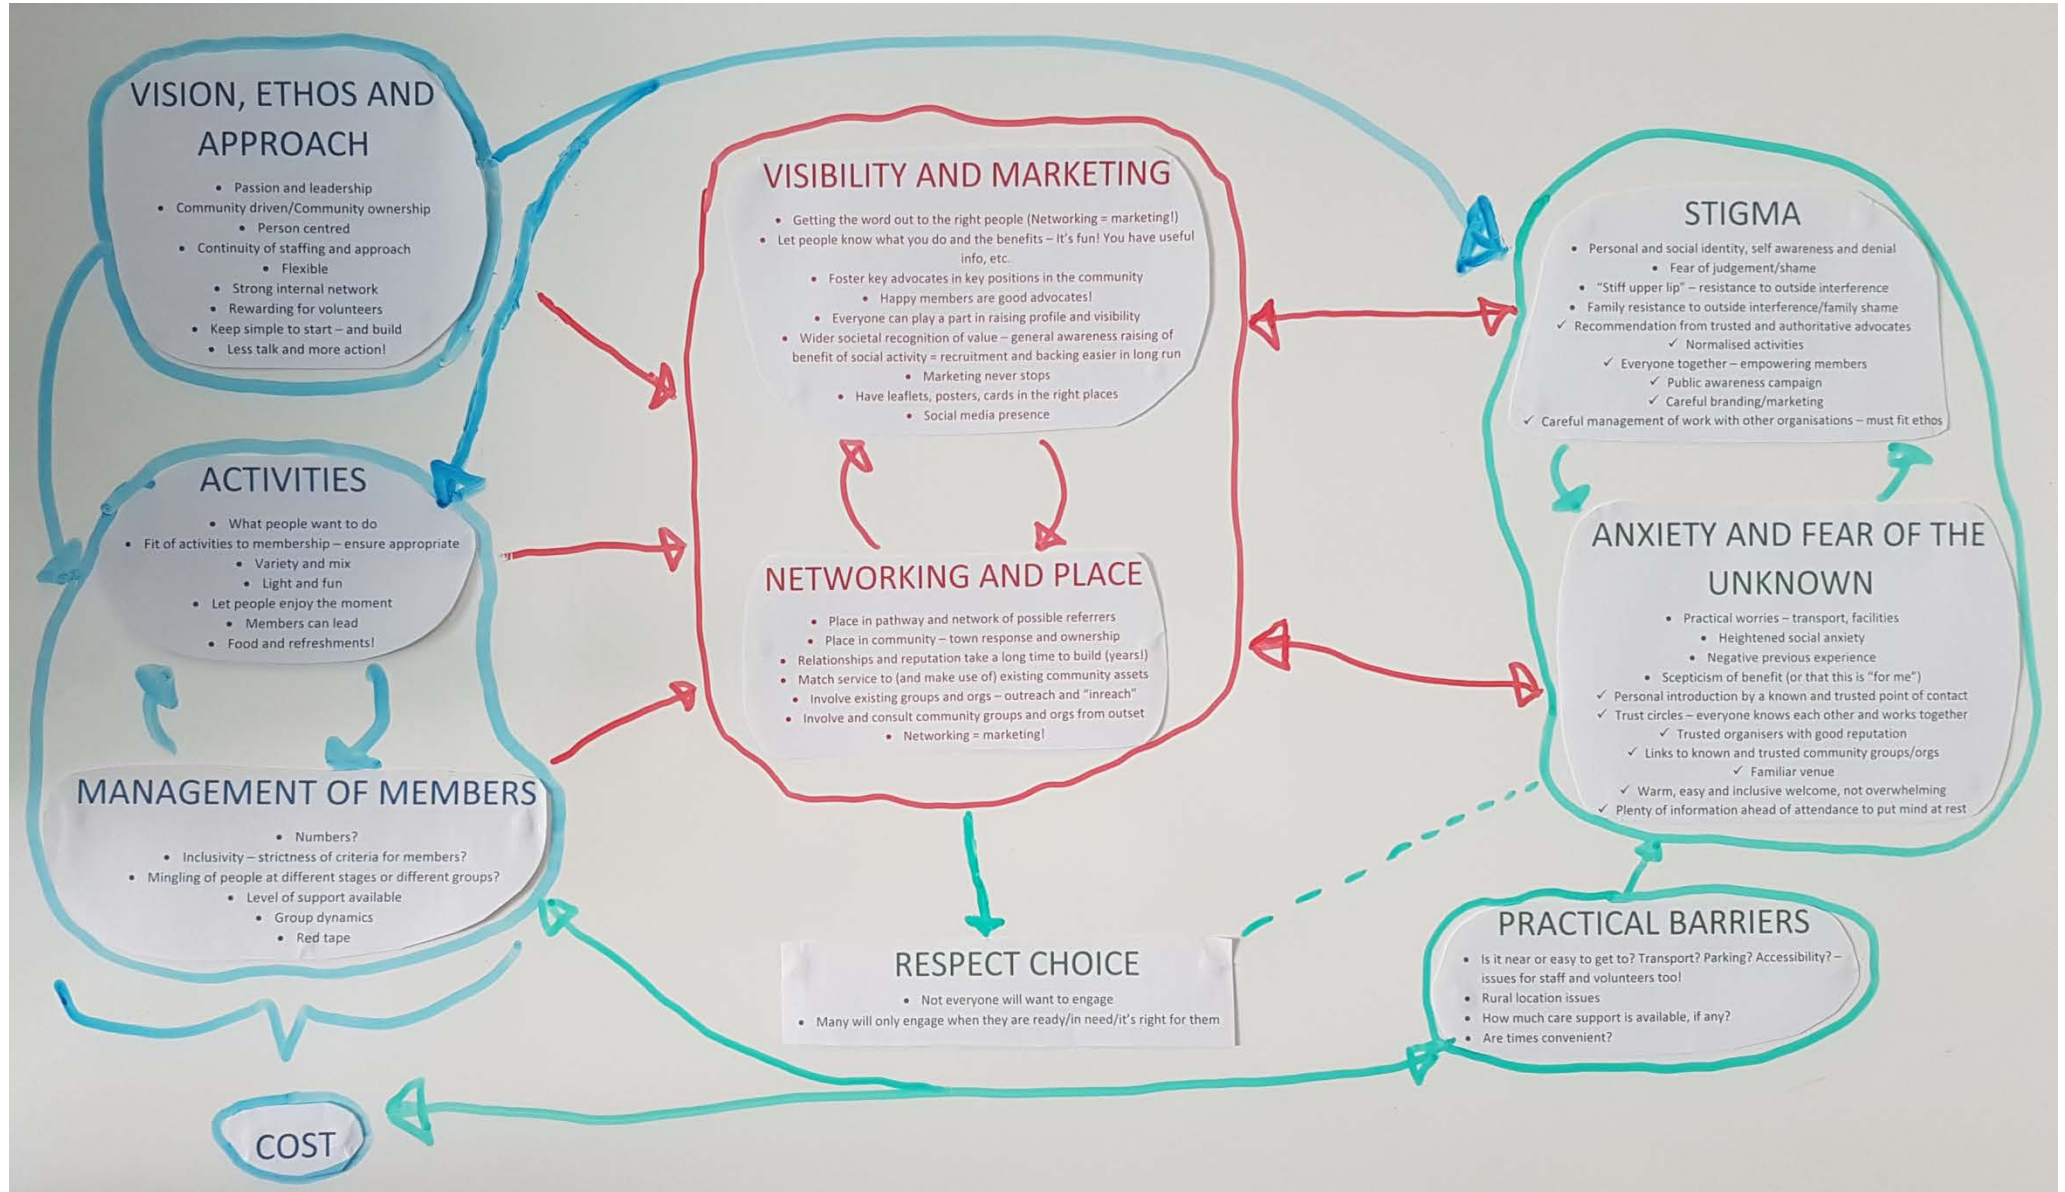



# Barriers and facilitators to sustainability

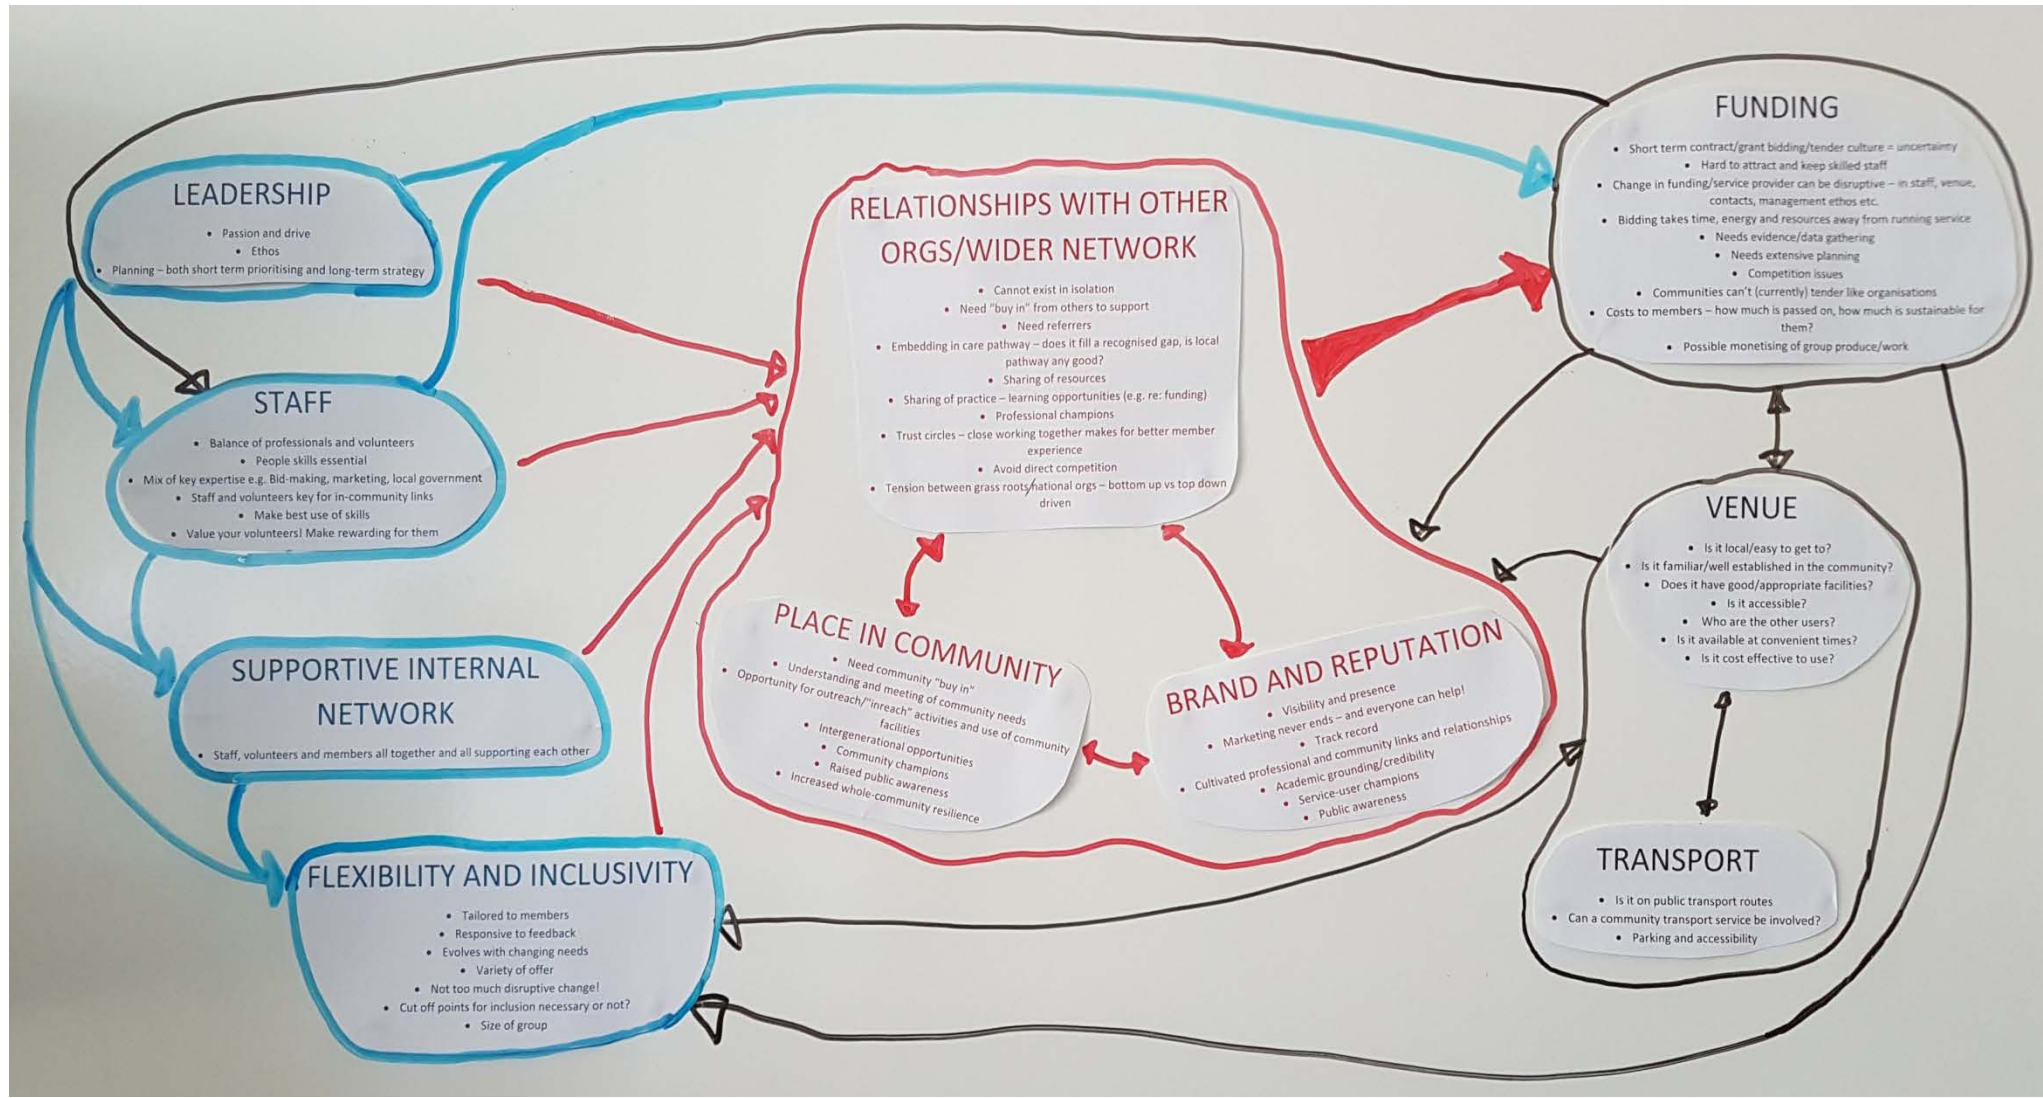

Top-level “parent” coding categories in NVivo analysis of the data

| Name                                                    | Files | References |     |
|---------------------------------------------------------|-------|------------|-----|
| Leadership                                              |       | 54         | 226 |
| Management of members (inc flexibility and inclusivity) |       | 66         | 219 |
| Staff and volunteer issues                              |       | 71         | 196 |
| Activities                                              |       | 94         | 577 |
| Ethos and approach                                      |       | 92         | 556 |
| Stability and reliability of provision                  |       | 14         | 23  |
| Anxiety and fear of unknown                             |       | 65         | 321 |
| Transport and geography                                 |       | 39         | 87  |
| Venue issues                                            |       | 60         | 203 |
| Attendee characteristics                                |       | 62         | 216 |
| Difficulty becoming a member                            |       | 23         | 50  |
| Visibility and marketing                                |       | 76         | 365 |
| Place in the community                                  |       | 67         | 295 |
| Relationships with other organisations                  |       | 71         | 567 |
| Funding issues                                          |       | 64         | 327 |
| Cost effectiveness issues                               |       | 35         | 68  |

**“How it’s run”**

**Barriers to engagement**

**Networking & marketing**

**Money & resources**

## Supplementary file 2: Search strategy

### Databases:

EBSCOhost: **Academic Search Complete, CINAHL, MEDLINE, PsychINFO**

Other health and social care databases: **AMED, Embase, PubMed, Social Care Online**

Interdisciplinary databases: **ProQuest, Scopus**

Systematic reviews: **Cochrane Library, Campbell Collaboration**

Other/general: **Google Scholar**

**Limiters:** Published 1990 to present

| Key terms                            | String of related terms                                                                                                              |
|--------------------------------------|--------------------------------------------------------------------------------------------------------------------------------------|
| <b>Dementia</b>                      | Dementia                                                                                                                             |
| <b>Community</b>                     | Commun* OR Local* OR Social*                                                                                                         |
| <b>Intervention</b>                  | Intervention OR Program* OR Project OR Initiative OR Scheme OR Service OR Activit* OR Group OR Club OR Network OR Meeting OR Therapy |
| <b>Sustainability</b>                | Sustain* OR Maint* OR Manag* OR Facilitat* OR Barrier*                                                                               |
| <b>Implementation and Engagement</b> | Implement* OR Recruit* OR Engag*                                                                                                     |

Dementia AND (Commun\* OR Local\* OR Social\*) AND (Intervention OR Program\* OR Project OR Initiative OR Scheme OR Service OR Activit\* OR Group OR Club OR Network OR Meeting OR Therapy) AND (Sustain\* OR Maint\* OR Manag\* OR Facilitat\* OR Barrier\*) AND (Implement\* OR Recruit\* OR Engag\*)

### NOTES:

Search terms were kept uniform across all databases and searching was carried out by looking for the occurrence of these terms within the title, abstract and key words of documents in each database. If a database did not allow for this, the strategy was altered slightly to the closest option (e.g. in ProQuest this was searching everywhere in a document except full text; in PubMed this was by carrying out three separate searches by title content, by abstract content and key word content, then combining the results).

## Supplementary file 3: Inclusion and assessment criteria

### Inclusion and exclusion criteria for formal search:

| <b>Inclusion criteria</b><br>Types of intervention for inclusion should:                                                                                                                                                                                                                                                                                                                                                                                                                                                                                                                                                                                                                                                                                                                                                                                                                                                                                                                                                   | <b>Exclusion criteria</b><br>Interventions will be excluded if they:                                                                                                                                                                                                                                                                                                                                                                                                                                                                                                                                                                                                                                                                                                                                                                                                                                                                                                                                                                                       |
|----------------------------------------------------------------------------------------------------------------------------------------------------------------------------------------------------------------------------------------------------------------------------------------------------------------------------------------------------------------------------------------------------------------------------------------------------------------------------------------------------------------------------------------------------------------------------------------------------------------------------------------------------------------------------------------------------------------------------------------------------------------------------------------------------------------------------------------------------------------------------------------------------------------------------------------------------------------------------------------------------------------------------|------------------------------------------------------------------------------------------------------------------------------------------------------------------------------------------------------------------------------------------------------------------------------------------------------------------------------------------------------------------------------------------------------------------------------------------------------------------------------------------------------------------------------------------------------------------------------------------------------------------------------------------------------------------------------------------------------------------------------------------------------------------------------------------------------------------------------------------------------------------------------------------------------------------------------------------------------------------------------------------------------------------------------------------------------------|
| <ul style="list-style-type: none"> <li>• Target people with mild to moderate dementia (whether exclusively or among others without dementia, but either way there is dementia-specific support)</li> <li>• Serve people living in the community, whether in their own homes or in extra-care housing</li> <li>• Are voluntary attendance (i.e. members have chosen to attend, not been told they must as part of treatment or respite care)</li> <li>• Are social and place-based (bringing people together physically) in a community setting (open to members of the public to attend)</li> <li>• Are designed as an intervention with meaningful activity aiming to improve quality of life for people with dementia and family carers, or to help them manage or lessen the challenging effects dementia</li> <li>• Meet at regular, pre-fixed times, at least weekly and for a substantial amount of time (i.e. a morning or afternoon)</li> <li>• Meet continuously, on an ongoing basis, or aim to do so</li> </ul> | <ul style="list-style-type: none"> <li>• Are only for those with severe dementia</li> <li>• Do not target, and have no plan to cater for, people with dementia</li> <li>• Are only for care home residents, hospital patients or those in a closed institutional setting</li> <li>• Are an online or at-a-distance networking scheme that does not involve meeting physically</li> <li>• Only involve individual participants alone (e.g. occupational therapy, counselling or medical)</li> <li>• Are only functional meetings solely for the purpose of administering medical treatment or carry out case management</li> <li>• Are focussed mainly upon respite for carers or nursing care only (i.e. not focussed upon social, meaningful and quality-of-life-raising activities for those attending)</li> <li>• Only take place monthly; or for a very short duration (e.g. one hour); or intermittently with no specified or timetabled meetings</li> <li>• Are fixed-term courses with a time/goal/session limit (e.g. an 8 week course)</li> </ul> |

### Relevance and rigour assessment guidance:

| <b>Relevance</b>                                                                                                                                                                                                                                       | <b>Rigour</b>                                                                                                                                                                                                                                                                                                                                                                                                                                                                                            |
|--------------------------------------------------------------------------------------------------------------------------------------------------------------------------------------------------------------------------------------------------------|----------------------------------------------------------------------------------------------------------------------------------------------------------------------------------------------------------------------------------------------------------------------------------------------------------------------------------------------------------------------------------------------------------------------------------------------------------------------------------------------------------|
| <p>An article should comply with the inclusion/exclusion criteria in the first instance, except where agreed by the team for inclusion for a specific reason e.g. containing data that is broadly transferable and of use to the programme theory.</p> | <p>This is an assessment of the likely validity and reliability only of the <i>relevant</i> data contained in an article, <i>not</i> an assessment of the rigour of a study or intervention programme as a whole. Useful questions might include: <i>Is this data likely to be biased? Is it dealt with critically? Is it from a real-world example or theoretical speculation? Was the data gathered in some depth over time or in a quick "snapshot"? Is it safe to generalise from this data?</i></p> |

| Reasons for rating must be recorded. For example:                                                                                                                                                                                                                                                                                                                                                                                                                                                                                            | Reasons for rating must be recorded. For example:                                                                                                                                                                                                                                                                                                                                                                                                                                                                                                                                                                                                                                                                                                      |
|----------------------------------------------------------------------------------------------------------------------------------------------------------------------------------------------------------------------------------------------------------------------------------------------------------------------------------------------------------------------------------------------------------------------------------------------------------------------------------------------------------------------------------------------|--------------------------------------------------------------------------------------------------------------------------------------------------------------------------------------------------------------------------------------------------------------------------------------------------------------------------------------------------------------------------------------------------------------------------------------------------------------------------------------------------------------------------------------------------------------------------------------------------------------------------------------------------------------------------------------------------------------------------------------------------------|
| <p>A <b>low rating</b> might mean the article only contains a few relevant lines, with the bulk of the text focused on other, non-relevant matters</p> <p>A <b>medium rating</b> might mean an article has a lot of detail on one relevant issue (e.g. engaging people and keeping them engaged) which is pertinent to sustainability, but otherwise little on other important factors</p> <p>A <b>high rating</b> will mean an article has a direct focus on keeping an intervention sustainable long term, with a good level of detail</p> | <p>A <b>low rating</b> might mean data appears uncritically treated and at a high risk of bias (e.g. from a promotional article for a service) or simply descriptive and superficial in its reporting of basic facts from an intervention programme (e.g. from a short news article)</p> <p>A <b>medium rating</b> might mean data appears with some attempt at critical evaluation and is from a real-world example, but is limited in scope and generalisability, or in depth and detail</p> <p>A <b>high rating</b> might mean data is of good depth and detail and is from a critical evaluation of at least one real world example, gathered over a sustained period using range of robust measures and an appropriate sample of participants</p> |



## Supplementary file 4: Full lists of included articles

| Author(s)                                                                                                | Year | Article title                                                                                                                                     | Type of intervention                                                                                            | Country of origin                                                  | Type of article/study           | Publication                                          | Reference list No. |
|----------------------------------------------------------------------------------------------------------|------|---------------------------------------------------------------------------------------------------------------------------------------------------|-----------------------------------------------------------------------------------------------------------------|--------------------------------------------------------------------|---------------------------------|------------------------------------------------------|--------------------|
| Actifcare                                                                                                | 2017 | Best practice recommendations from the Actifcare study: Access to community care services for home-dwelling people with dementia and their carers | <b>community care services</b> in general                                                                       | Netherlands, Germany, Sweden, UK, Norway, Ireland, Portugal, Italy | Recommendations report          | www.actifcare.eu                                     | <b>36</b>          |
| Alzheimer's Australia                                                                                    | 2014 | The benefits of physical activity and exercise for people living with dementia (Discussion paper 11)                                              | <b>Exercise activities</b>                                                                                      | Australia                                                          | Report                          | Alzheimer's Australia                                | <b>69</b>          |
| Arkin                                                                                                    | 1999 | Elder rehab: A student-supervised exercise program for Alzheimer's patients                                                                       | <b>Weekly exercise programme</b> pairing elders and student helpers at a college gym (caregivers also involved) | US                                                                 | Journal paper - programme pilot | The Gerontologist                                    | <b>92</b>          |
| Arthur, Buckner, Buswell, Darlington, Killett, Lafortune, Mathie, Mayrhofer, Skedgel, Woodward & Goodman | 2020 | DEMCOM: National Evaluation of Dementia Friendly Communities (Executive Summary)                                                                  | <b>Dementia Friendly Communities - various social and leisure activities</b>                                    | UK                                                                 | Evaluation report               | Applied Research Collaboration (ARC) East of England | <b>90</b>          |



1  
2  
3  
4  
5  
6  
7  
8  
9  
10  
11  
12  
13  
14  
15  
16  
17  
18  
19  
20  
21  
22  
23  
24  
25  
26  
27  
28  
29  
30  
31  
32  
33  
34  
35  
36  
37  
38  
39  
40  
41  
42  
43  
44  
45  
46

|                                      |      |                                                                                                                       |                                       |                                |                                                 |                                                            |           |
|--------------------------------------|------|-----------------------------------------------------------------------------------------------------------------------|---------------------------------------|--------------------------------|-------------------------------------------------|------------------------------------------------------------|-----------|
| Bould, McFadyen & Thomas             | 2019 | Dementia-friendly sport and physical activity guide                                                                   | <b>Sport and exercise initiatives</b> | UK                             | Information booklet                             | Alzheimer's Society                                        | <b>48</b> |
| Brataas, Bjugan, Wille & Hellzen     | 2010 | Experiences of day care and collaboration among people with mild dementia                                             | <b>Day care</b>                       | Norway                         | Journal paper - qual study of a trial programme | Journal of Clinical Nursing                                | <b>65</b> |
| Brooker, Evans, Evans, Watts & Drees | 2017 | Meeting Centres Support Programme UK: Overview, evidence and getting started                                          | <b>Meeting Centres</b>                | Netherlands, Italy, Poland, UK | Information/guide booklet                       | Association for Dementia Studies (University of Worcester) | <b>42</b> |
| Cahill, Pierce & Bobersky            | 2014 | An evaluation report on flexible respite options of the Living Well With Dementia project in Stillorgan and Blackrock | <b>Day care/respite</b>               | Ireland                        | Evaluation report                               | Trinity College Dublin                                     | <b>57</b> |

|                                                                                                                            |                                                                                                                     |      |                                                                                                                                        |                                           |    |                                     |                                       |           |
|----------------------------------------------------------------------------------------------------------------------------|---------------------------------------------------------------------------------------------------------------------|------|----------------------------------------------------------------------------------------------------------------------------------------|-------------------------------------------|----|-------------------------------------|---------------------------------------|-----------|
| 1<br>2<br>3<br>4<br>5<br>6<br>7<br>8<br>9                                                                                  | Carone, Tischler & Dening                                                                                           | 2016 | Football and dementia: A qualitative investigation of a community based sports group for men with early onset dementia                 | <b>Sport and exercise group</b>           | UK | Journal paper - qualitative study   | Dementia                              | <b>58</b> |
| 10<br>11<br>12<br>13<br>14<br>15<br>16<br>17                                                                               | Casey                                                                                                               | 2004 | Early onset dementia: Getting out and about                                                                                            | <b>Small "out and about" social group</b> | UK | Specialist news article             | Journal of Dementia Care              | <b>66</b> |
| 18<br>19<br>20<br>21<br>22<br>23<br>24<br>25                                                                               | Clarke, Keyes, Wilkinson, Alexjuk, Wilcockson, Robinson, Corner & Cattan                                            | 2014 | Organisational space for partnership and sustainability: lessons from the implementation of the National Dementia Strategy for England | <b>Peer support networks</b>              | UK | Journal paper - strategy evaluation | Health & Social Care in the Community | <b>51</b> |
| 26<br>27<br>28<br>29<br>30<br>31<br>32<br>33<br>34<br>35<br>36<br>37<br>38<br>39<br>40<br>41<br>42<br>43<br>44<br>45<br>46 | Daykin, Julier, Tomlinson, Meads, Mansfield, Payne, Duffy, Lane, D'Innocenzo, Burnett, Kay, Dolan, Testoni & Victor | 2016 | Review of the grey literature: music, singing and wellbeing                                                                            | <b>Singing and musical activities</b>     | UK | Review/Report                       | What Works Wellbeing report           | <b>37</b> |

1  
2  
3  
4  
5  
6  
7  
8  
9  
10  
11  
12  
13  
14  
15  
16  
17  
18  
19  
20  
21  
22  
23  
24  
25  
26  
27  
28  
29  
30  
31  
32  
33  
34  
35  
36  
37  
38  
39  
40  
41  
42  
43  
44  
45  
46

|                                                       |      |                                                                                                               |                                               |       |                                      |                                   |           |
|-------------------------------------------------------|------|---------------------------------------------------------------------------------------------------------------|-----------------------------------------------|-------|--------------------------------------|-----------------------------------|-----------|
| Dean, Silversides, Crampton & Wrigley                 | 2015 | Evaluation of the Bradford Dementia Friendly Communities Programme                                            | <b>Activities and groups in the community</b> | UK    | Evaluation report                    | Joseph Rowntree Foundation report | <b>76</b> |
| Dean, Silversides, Crampton & Wrigley                 | 2015 | Evaluation of the York Dementia Friendly Communities Programme                                                | <b>Activities and groups in the community</b> | UK    | Evaluation report                    | Joseph Rowntree Foundation report | <b>77</b> |
| Gajardo, Aravena, Budinich, Larrain, Fuentes & Gitlin | 2017 | The Kintun program for families with dementia: From novel experiment to national policy (innovative practice) | <b>Day centre and dementia community hub</b>  | Chile | Journal article - program evaluation | Dementia                          | <b>59</b> |
| Glover                                                | 2014 | Running self-help groups in sheltered and extra care accommodation for people who live with dementia          | <b>Self-help social and activity groups</b>   | UK    | Information/guide booklet            | Mental Health Foundation          | <b>43</b> |

|                                                     |      |                                                                                                           |                                                                              |           |                                    |                                                           |           |
|-----------------------------------------------------|------|-----------------------------------------------------------------------------------------------------------|------------------------------------------------------------------------------|-----------|------------------------------------|-----------------------------------------------------------|-----------|
| Gottlieb-Tanaka                                     | 2006 | Creative expression, dementia and the therapeutic environment                                             | <b>Art/creative activities in a day centre environment</b>                   | Canada    | Dissertation/Thesis                |                                                           | <b>63</b> |
| Green & Lakey (Alzheimer's Society)                 | 2013 | Building dementia-friendly communities: a priority for everyone                                           | <b>Dementia Friendly Communities</b> - various social and leisure activities | UK        | Report                             | Alzheimer's Society                                       | <b>49</b> |
| Grinberg, Lagunoff, Phillips, Stern, Goodman & Chow | 2007 | Multidisciplinary design and implementation of a day program specialized for the frontotemporal dementias | <b>Day program</b> for people with FTD                                       | Canada    | Journal paper - program evaluation | American Journal of Alzheimer's Disease & Other Dementias | <b>60</b> |
| Hayes & Williamson                                  | 2007 | Men's Sheds: Exploring the Evidence for Best Practice                                                     | <b>Men's Sheds</b>                                                           | Australia | Evaluation report                  | School of Public Health, La Trobe University              | <b>70</b> |

1  
2  
3  
4  
5  
6  
7  
8  
9  
10  
11  
12  
13  
14  
15  
16  
17  
18  
19  
20  
21  
22  
23  
24  
25  
26  
27  
28  
29  
30  
31  
32  
33  
34  
35  
36  
37  
38  
39  
40  
41  
42  
43  
44  
45  
46

|                                                                                                               |      |                                                                                                                    |                                                      |       |                                    |                                        |           |
|---------------------------------------------------------------------------------------------------------------|------|--------------------------------------------------------------------------------------------------------------------|------------------------------------------------------|-------|------------------------------------|----------------------------------------|-----------|
| Health Innovation Network South London** (**see also linked films within document plus 2015 HIN Case Studies) | 2015 | Peer Support for People with Dementia Resource Pack                                                                | A range of <b>peer support groups and activities</b> | UK    | Information/guide booklet          | Health Innovation Network South London | <b>80</b> |
| Health Innovation Network South London                                                                        | 2015 | Case Study: Dulwich Helpline and Southwark Churches Care (DH&SCC) – The Dementia Project, Southwark, South London. | <b>Peer support project</b>                          | UK    | Information/guide booklet          | Health Innovation Network South London | <b>52</b> |
| Health Innovation Network South London                                                                        | 2015 | Case Study: The Healthy Living Club (HLC) – A self-directed, dementia-centred community group in Stockwell, London | <b>Peer support group</b>                            | UK    | Information/guide booklet          | Health Innovation Network South London | <b>85</b> |
| Hikichi, Kondo, Takeda & Kawachi                                                                              | 2017 | Social interaction and cognitive decline: Results of a 7-year community intervention                               | <b>Community centres for older people</b>            | Japan | Journal paper - longitudinal study | Alzheimer's & Dementia                 | <b>81</b> |

|                                                                            |      |                                                                                                                                                                  |                                                                      |         |                                                    |                                     |           |
|----------------------------------------------------------------------------|------|------------------------------------------------------------------------------------------------------------------------------------------------------------------|----------------------------------------------------------------------|---------|----------------------------------------------------|-------------------------------------|-----------|
| Hochgraeber, Bartholomeyczik & Holle** (**See also Hochgraeber et al 2017) | 2012 | Low-threshold support for families with dementia in Germany                                                                                                      | <b>"Low threshold" support services including social care groups</b> | Germany | Journal paper - survey protocol                    | BMC Research Notes                  | <b>82</b> |
| Hochgraeber, Von Kutzleben, Bartholomeyczik & Holle                        | 2017 | Low-threshold support services for people with dementia within the scope of respite care in Germany – A qualitative study on different stakeholders' perspective | <b>"Low threshold" support services including social care groups</b> | Germany | Journal paper - qualitative study                  | Dementia                            | <b>38</b> |
| Jackson                                                                    | 2017 | The Debenham Project: Project Blog and Catch-Up                                                                                                                  | <b>Range of local support groups and activities</b>                  | UK      | Project blog newsletter/report                     | Debenham Project                    | <b>87</b> |
| Kelsey & Laditka                                                           | 2005 | Evaluating best practices for social model programs for adults with Alzheimer's disease in South Carolina                                                        | <b>"Social model" day care</b>                                       | US      | Journal paper - review and survey of best practice | Home Health Care Services Quarterly | <b>91</b> |

|                                                                |      |                                                                                                                                                                                   |                                                                             |    |                                                |                                                           |           |
|----------------------------------------------------------------|------|-----------------------------------------------------------------------------------------------------------------------------------------------------------------------------------|-----------------------------------------------------------------------------|----|------------------------------------------------|-----------------------------------------------------------|-----------|
| La Rue, Felten, Duschene, MacFarlane, Price, Zimmerman & Havez | 2013 | Language-enriched exercise plus socialization for older adults with dementia: Translation to rural communities                                                                    | <b>Language, exercise and socialisation program</b>                         | US | Journal paper - trial program in rural setting | Seminars in Speech and Language                           | <b>83</b> |
| La Rue, Felten & Turkstra                                      | 2015 | Intervention of Multi-Modal Activities for Older Adults With Dementia Translation to Rural Communities                                                                            | <b>Language, exercise and socialisation program</b>                         | US | Journal paper - trial program in rural setting | American Journal of Alzheimer's Disease & Other Dementias | <b>53</b> |
| LeBlanc                                                        | 2010 | Integrating behavioral psychology services into adult day programming for individuals with dementia                                                                               | <b>Day care (for people with dementia exhibiting challenging behaviour)</b> | US | Journal paper - program evaluation             | Behavior Modification                                     | <b>93</b> |
| Lockwood                                                       | 2012 | The Debenham Project: A case study of a unique community-led and owned project dedicated to the support of carers of those that have symptoms of dementia and those they care for | <b>Range of local support groups and activities</b>                         | UK | Case study report                              | Community Catalysts                                       | <b>84</b> |

|                                                                   |                                                                                                                                         |      |                                                                                                                             |                                                                                         |                                |                                    |                                     |           |
|-------------------------------------------------------------------|-----------------------------------------------------------------------------------------------------------------------------------------|------|-----------------------------------------------------------------------------------------------------------------------------|-----------------------------------------------------------------------------------------|--------------------------------|------------------------------------|-------------------------------------|-----------|
| 1<br>2<br>3<br>4<br>5<br>6<br>7<br>8<br>9<br>10<br>11<br>12<br>13 | Mangiaracina, Chattat, Farina, Saibene, Gamberini, Brooker, Evans, Evans, Szcześniak, Urbanska, Rymaszewska, Hendricks, Dröes & Meiland | 2017 | Not re-inventing the wheel: the adaptive implementation of the meeting centres support programme in four European countries | <b>Meeting Centres</b>                                                                  | Netherlands, Italy, Poland, UK | Journal paper - project evaluation | Aging & Mental Health               | <b>86</b> |
| 14<br>15<br>16<br>17<br>18<br>19<br>20                            | Mapes, Milton, Nicholls & Williamson (Natural England)                                                                                  | 2016 | Is it nice outside? Consulting people living with dementia and their carers about engaging with the natural environment     | <b>Outdoor activities</b>                                                               | UK                             | Report                             | Natural England report              | <b>64</b> |
| 21<br>22<br>23<br>24<br>25<br>26<br>27                            | Marshall & Jackson                                                                                                                      | 2015 | Encouraging and supporting the growth of "dementia proactive communities"                                                   | <b>Dementia proactive communities</b><br>(Range of local support groups and activities) | UK                             | Report                             | Debenham Project & Sue Ryder        | <b>50</b> |
| 28<br>29<br>30<br>31<br>32<br>33<br>34<br>35<br>36                | Mason & Slack                                                                                                                           | 2013 | The Debenham Project: Research into the dementia/memory loss journey for cared-for and carer, 2012-13                       | Range of local support groups and activities                                            | UK                             | Evaluation report - survey         | Norfolk & Suffolk Dementia Alliance | <b>54</b> |

37  
38  
39  
40  
41  
42  
43  
44  
45  
46



1  
2  
3  
4  
5  
6  
7  
8  
9  
10  
11  
12  
13  
14  
15  
16  
17  
18  
19  
20  
21  
22  
23  
24  
25  
26  
27  
28  
29  
30  
31  
32  
33  
34  
35  
36  
37  
38  
39  
40  
41  
42  
43  
44  
45  
46

|                                            |      |                                                                                                                                              |                                                                                            |             |                                                            |                                                             |           |
|--------------------------------------------|------|----------------------------------------------------------------------------------------------------------------------------------------------|--------------------------------------------------------------------------------------------|-------------|------------------------------------------------------------|-------------------------------------------------------------|-----------|
| McAiney, Hillier, Stolee, Harvey & Michael | 2012 | 'Throwing a lifeline': the role of First Link in enhancing support for individuals with dementia and their caregivers                        | Information on and links between <b>support services (including groups and activities)</b> | Canada      | Journal paper - evaluation                                 | Neurodegenerative Disease Management (Future Medicine)      | <b>88</b> |
| McDonald & Heath                           | 2009 | Developing services for people with dementia                                                                                                 | <b>General dementia support services</b> in rural areas                                    | UK          | Journal short report feature - review of service provision | Working with Older People: Community Care Policy & Practice | <b>39</b> |
| The Me Myself and I Club                   | 2018 | The Me, Myself and I Club, Briton Ferry: A case study in warm humanity and meaningful co-production                                          | <b>Friendship club and support services</b>                                                | UK (Wales)  | Programme/service report                                   | Me Myself and I Club                                        | <b>46</b> |
| Meiland, Dröes, De Lang & Vernooij-Dassen  | 2004 | Development of a theoretical model for tracing facilitators and barriers in adaptive implementation of innovative practices in dementia care | <b>Meeting centres</b>                                                                     | Netherlands | Journal paper - model development                          | Archives Of Gerontology And Geriatrics Supplement           | <b>55</b> |

|                                           |      |                                                                                                                        |                            |             |                                              |                                 |           |
|-------------------------------------------|------|------------------------------------------------------------------------------------------------------------------------|----------------------------|-------------|----------------------------------------------|---------------------------------|-----------|
| Meiland, Dröes, De Lang & Vernooij-Dassen | 2005 | Facilitators and barriers in the implementation of the Meeting Centres model for people with dementia and their carers | <b>Meeting centres</b>     | Netherlands | Journal paper - model test                   | Health Policy                   | <b>61</b> |
| The Mental Health Foundation              | 2018 | An evaluation of the Standing Together project                                                                         | <b>Peer support groups</b> | UK          | Evaluation report                            | Mental Health Foundation report | <b>73</b> |
| Milligan, Payne, Bingley & Cockshott      | 2015 | Place and wellbeing: shedding light on activity interventions for older men                                            | <b>Men's Sheds</b>         | UK          | Journal paper - qualitative study of program | Ageing & Society                | <b>71</b> |
| Moore                                     | 2002 | Observed affect in a dementia day center: Does the physical setting matter?                                            | <b>Day centre</b>          | US          | Journal paper - case study/field observation | Alzheimer's Care Quarterly      | <b>89</b> |

1  
2  
3  
4  
5  
6  
7  
8  
9  
10  
11  
12  
13  
14  
15  
16  
17  
18  
19  
20  
21  
22  
23  
24  
25  
26  
27  
28  
29  
30  
31  
32  
33  
34  
35  
36  
37  
38  
39  
40  
41  
42  
43  
44  
45  
46

|                                       |      |                                                                                                                                                                            |                                                             |            |                     |                                              |           |
|---------------------------------------|------|----------------------------------------------------------------------------------------------------------------------------------------------------------------------------|-------------------------------------------------------------|------------|---------------------|----------------------------------------------|-----------|
| Noimuenwai                            | 2012 | Effectiveness of adult day care programs on health outcomes of Thai family caregivers of persons with dementia                                                             | <b>Day care (Thailand)</b>                                  | Thailand   | Dissertation/Thesis |                                              | <b>78</b> |
| NVCO                                  | 2019 | How To Fundraise In Tough Times                                                                                                                                            | <b>Third sector and non-profit organisations in general</b> | UK         | Information guide   | NCVO Knowhow website                         | <b>94</b> |
| Older People's Commissioner for Wales | 2018 | Rethinking respite for people affected by dementia                                                                                                                         | <b>Respite/day services</b>                                 | UK (Wales) | Report              | Older People's Commissioner for Wales report | <b>47</b> |
| Oliver-Watkins, Kendall & Matthews    | 2016 | Sow & Grow: Report from a two-year Social and Therapeutic Horticultural (STH) programme delivering table-top gardening courses to adults in the community aged 50 and over | <b>Gardening groups</b>                                     | UK         | Evaluation report   | Sow & Grow                                   | <b>67</b> |

|                                                    |      |                                                                                                                                         |                                                                                 |         |                                       |                                    |           |
|----------------------------------------------------|------|-----------------------------------------------------------------------------------------------------------------------------------------|---------------------------------------------------------------------------------|---------|---------------------------------------|------------------------------------|-----------|
| Reichet & Wolter                                   | 2017 | Implementing physical activity programs for people with dementia: Results from a German study                                           | <b>Sports club initiatives</b>                                                  | Germany | Poster presentation                   |                                    | <b>44</b> |
| Reichet & Wolter                                   | 2017 | Implementing physical activity programs for people with dementia: Results from a German study                                           | <b>Sports club initiatives</b>                                                  | Germany | Conference abstract                   | Innovation in Aging (Supplement)   | <b>45</b> |
| Rio                                                | 2018 | A Community-Based Music Therapy Support Group for People With Alzheimer's Disease and Their Caregivers: A Sustainable Partnership Model | <b>Music therapy group</b>                                                      | US      | Journal paper - program evaluation    | Frontiers In Medicine              | <b>62</b> |
| Shnall, Agate, Grinberg, Huijbregts, Nguyen & Chow | 2013 | Development of supportive services for frontotemporal dementias through community engagement                                            | <b>Day program for FTD</b> (plus online groups and resources for family carers) | Canada  | Journal paper - review of initiatives | International Review of Psychiatry | <b>96</b> |

|                            |      |                                                                                                                                                             |                                                         |        |                                            |                                                |           |
|----------------------------|------|-------------------------------------------------------------------------------------------------------------------------------------------------------------|---------------------------------------------------------|--------|--------------------------------------------|------------------------------------------------|-----------|
| Solutions Research         | 2016 | Public perceptions and experiences of community-based end of life care initiatives: a qualitative research report                                           | <b>Community-based support initiatives</b> of all kinds | UK     | Report                                     | Public Health England report                   | <b>56</b> |
| Strandenæs, Lund & Rokstad | 2018 | Experiences of attending day care services designed for people with dementia - a qualitative study with individual interviews                               | <b>Day care</b>                                         | Norway | Journal paper - qualitative study          | Aging & Mental Health                          | <b>40</b> |
| Thrive                     | 2012 | Growing4life - A Thrive Community Gardening Project: A practical guide to setting up a community gardening project for people affected by mental ill health | <b>Gardening groups</b>                                 | UK     | Information/guide booklet                  | Thrive (The Society for Horticultural Therapy) | <b>74</b> |
| Tuppen                     | 2012 | The benefits of groups that provide cognitive stimulation for people with dementia                                                                          | <b>Cognitive stimulation clubs</b>                      | UK     | Journal article - overview of intervention | Nursing Older People                           | <b>72</b> |

|                                                                                                                               |      |                                                                                                                                                                                    |                                    |                                |                                         |                                                    |           |
|-------------------------------------------------------------------------------------------------------------------------------|------|------------------------------------------------------------------------------------------------------------------------------------------------------------------------------------|------------------------------------|--------------------------------|-----------------------------------------|----------------------------------------------------|-----------|
| Tuppen & Jones                                                                                                                | 2015 | Cogs Clubs: a helpful activity in early dementia                                                                                                                                   | <b>Cognitive stimulation clubs</b> | UK                             | Specialist news article                 | Journal of Dementia Care                           | <b>75</b> |
| Van Haeften-van Dijk, Meiland, van Mierlo & Dröes                                                                             | 2015 | Transforming nursing home-based day care for people with dementia into socially integrated community day care: Process analysis of the transition of six day care centres          | <b>Meeting centres</b>             | Netherlands                    | Journal paper - process evaluation      | International Journal of Nursing Studies           | <b>79</b> |
| Van Mierlo, Chattat, Evans, Brooker, Saibene, Gamberini, Farina, Scorolli, Szcześniak, Urbańska, Rymaszewska, Dröes & Meiland | 2018 | Facilitators and barriers to adaptive implementation of the Meeting Centers Support Program (MCSP) in three European countries; the process evaluation within the MEETINGDEM study | <b>Meeting centres</b>             | Netherlands, Italy, Poland, UK | Journal paper - program evaluation      | International Psychogeriatrics                     | <b>41</b> |
| Williams & Roberts                                                                                                            | 1995 | Friends in passing: social interaction at an adult day care center                                                                                                                 | <b>Adult day care centre</b>       | US                             | Journal paper - participant observation | International Journal Of Aging & Human Development | <b>68</b> |

1  
2  
3  
4  
5  
6  
7  
8  
9  
10  
11  
12  
13  
14  
15  
16  
17  
18  
19  
20  
21  
22  
23  
24  
25  
26  
27  
28  
29  
30  
31  
32  
33  
34  
35  
36  
37  
38  
39  
40  
41  
42  
43  
44  
45  
46

|                                                                                             |      |                                                                                |                            |        |                               |                 |           |
|---------------------------------------------------------------------------------------------|------|--------------------------------------------------------------------------------|----------------------------|--------|-------------------------------|-----------------|-----------|
| Wimo, Wallin, Lundgren, Ronnback, Asplund, Mattsson & Krakau (see also Clarkson et al 2017) | 1990 | Impact of Day Care on Dementia Patients—Costs, Well-being and Relatives' Views | <b>Specialist day care</b> | Sweden | Journal paper - cost analysis | Family Practice | <b>95</b> |
|---------------------------------------------------------------------------------------------|------|--------------------------------------------------------------------------------|----------------------------|--------|-------------------------------|-----------------|-----------|

For peer review only





1  
2  
3  
4  
5  
6  
7  
8  
9  
10  
11  
12  
13  
14  
15  
16  
17  
18  
19  
20  
21  
22  
23  
24  
25  
26  
27  
28  
29  
30  
31  
32  
33  
34  
35  
36  
37  
38  
39  
40  
41  
42  
43  
44  
45  
46

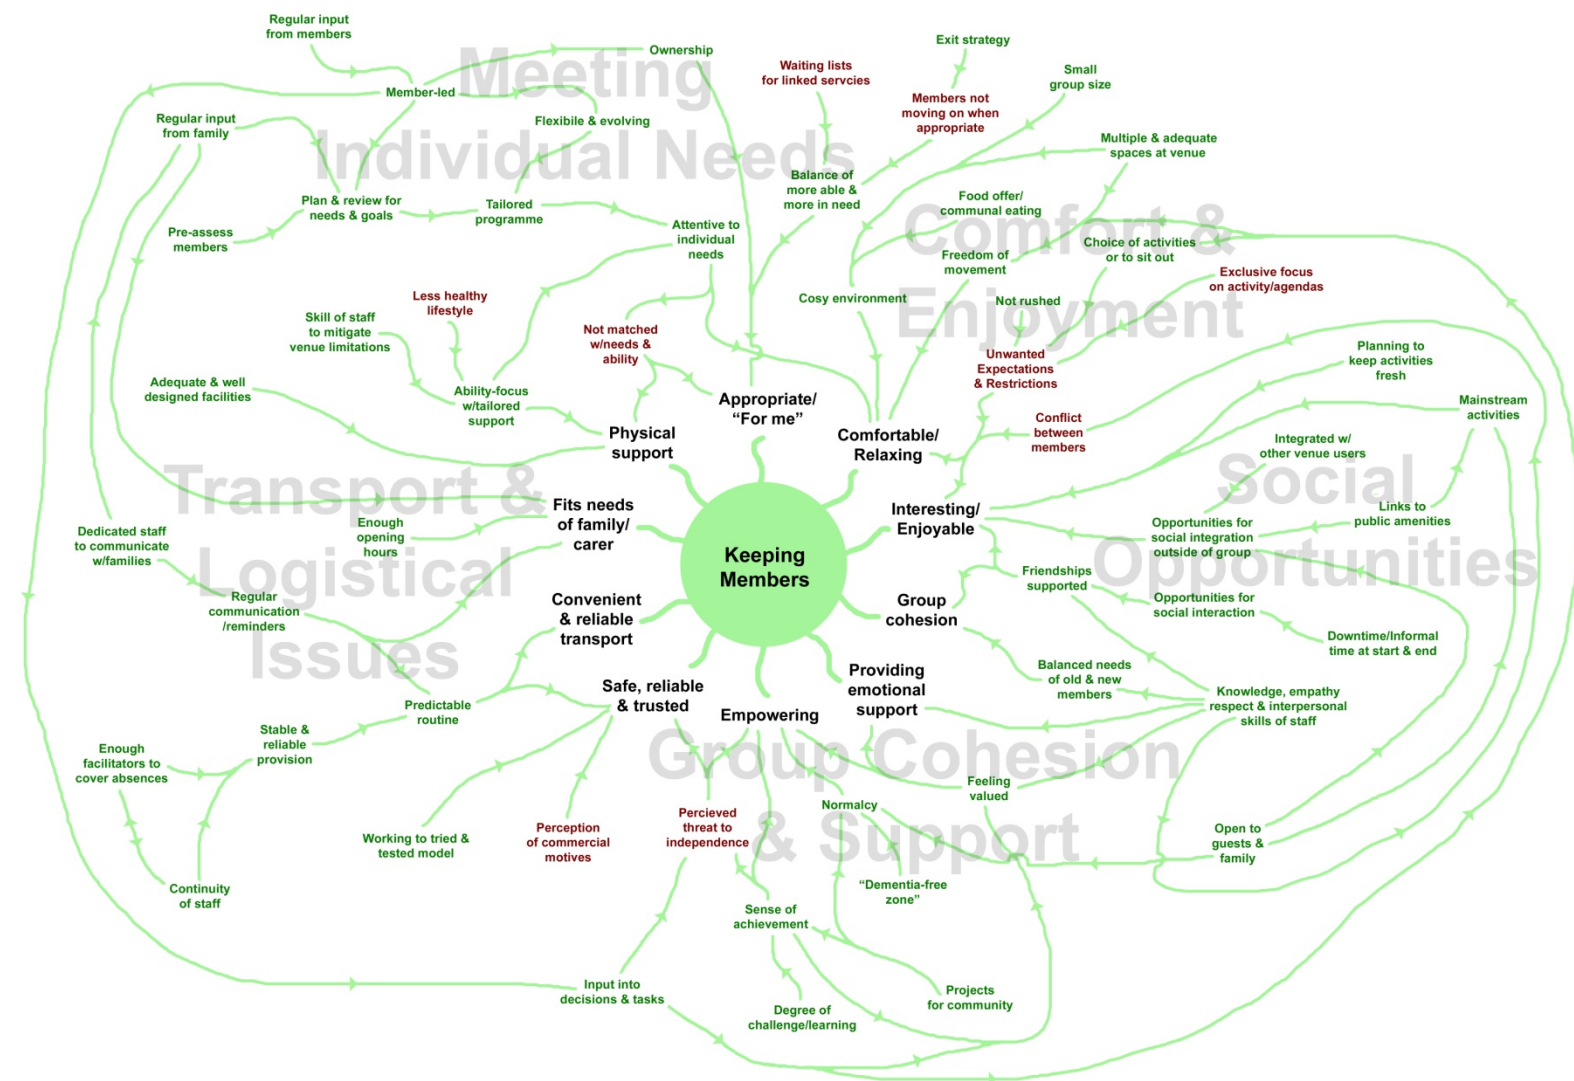

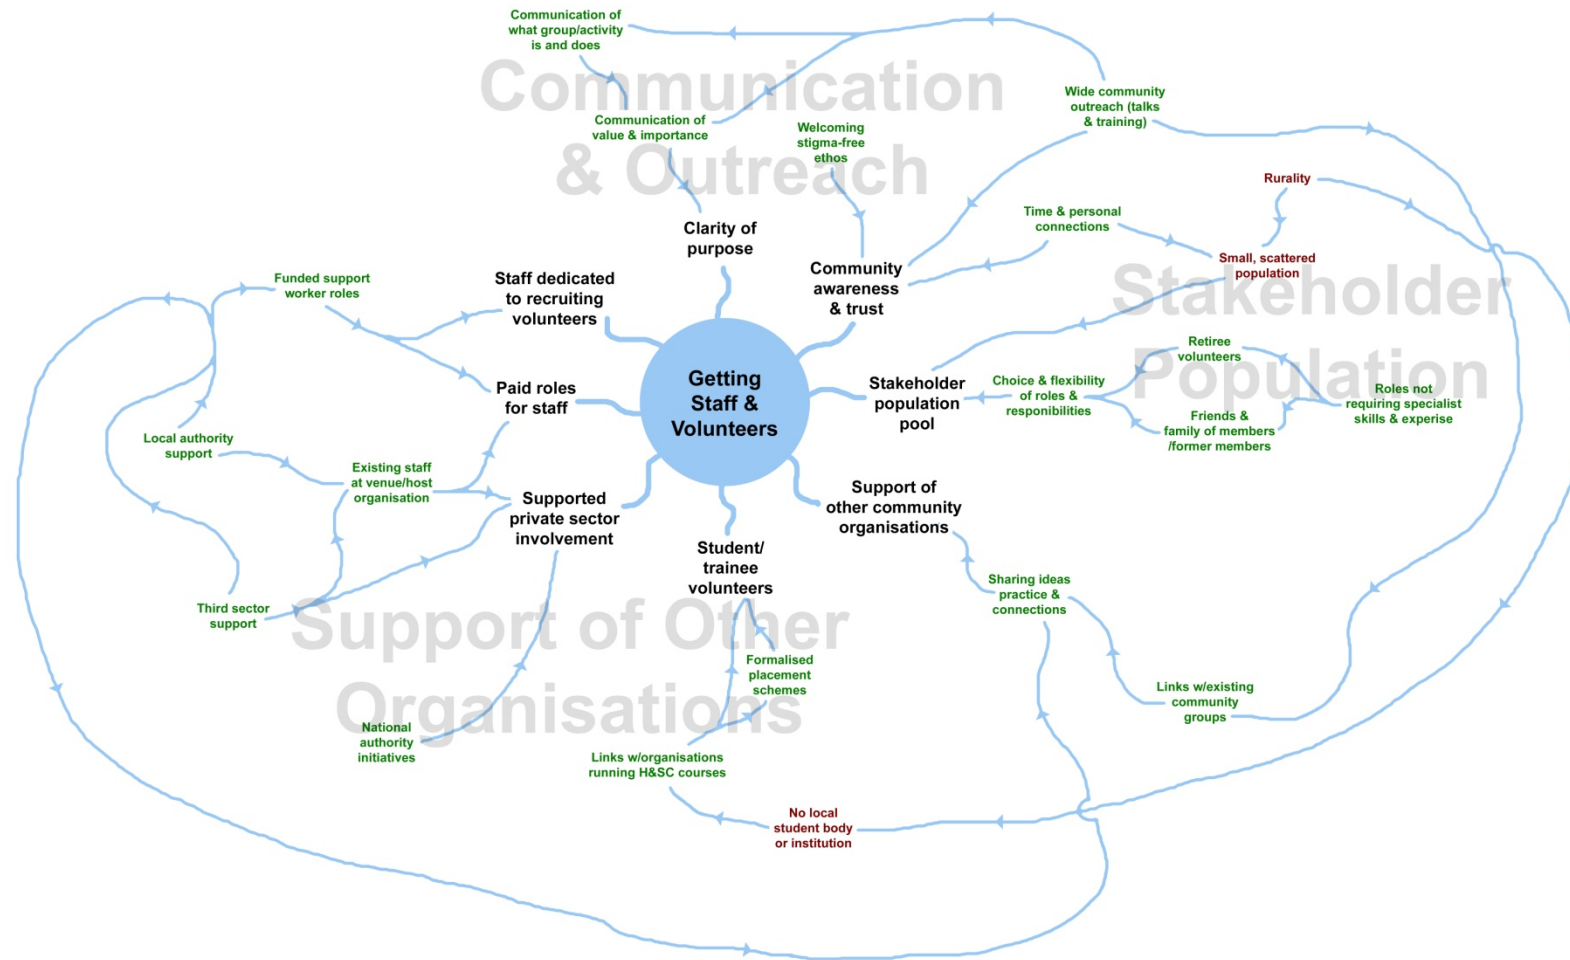

1  
2  
3  
4  
5  
6  
7  
8  
9  
10  
11  
12  
13  
14  
15  
16  
17  
18  
19  
20  
21  
22  
23  
24  
25  
26  
27  
28  
29  
30  
31  
32  
33  
34  
35  
36  
37  
38  
39  
40  
41  
42  
43  
44  
45  
46

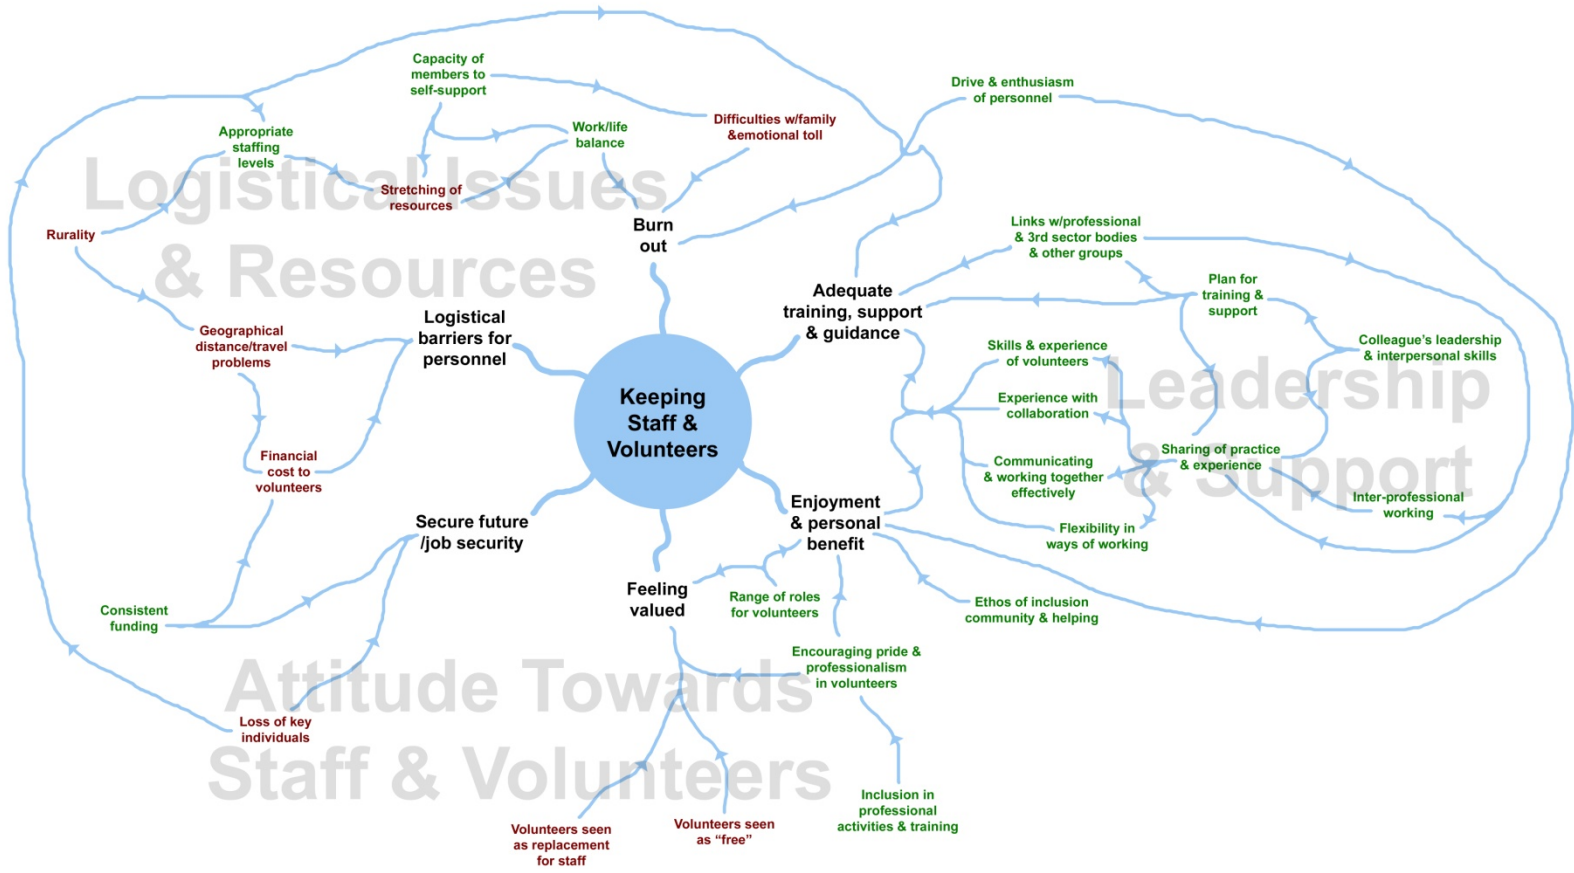

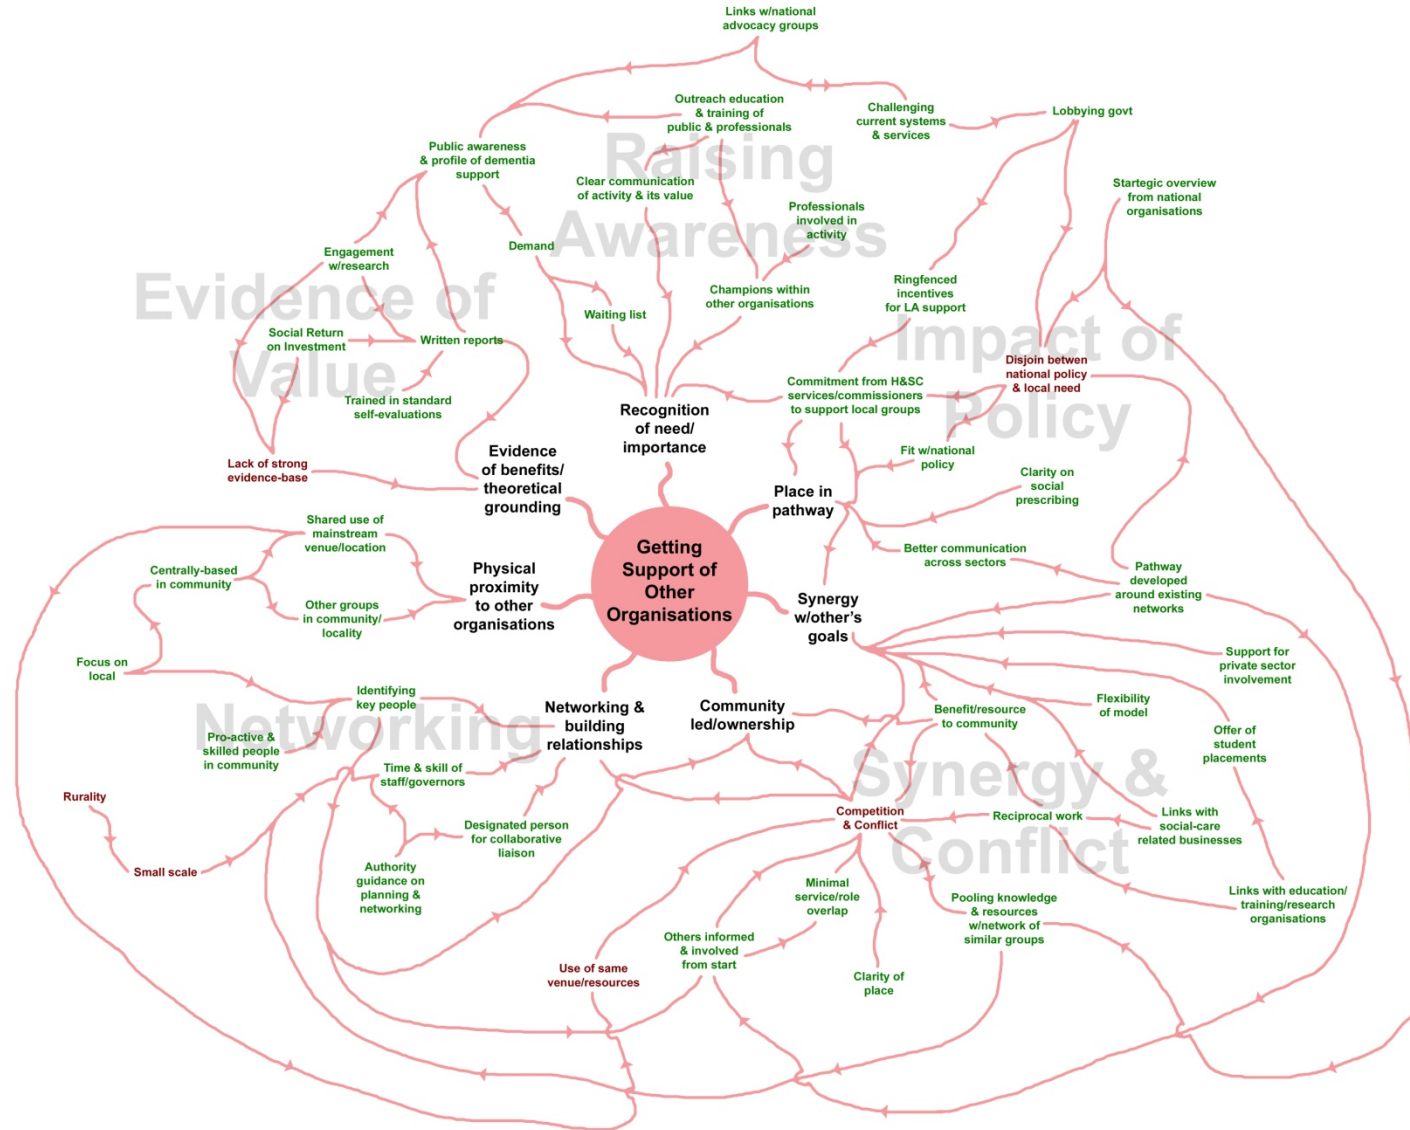

1  
2  
3  
4  
5  
6  
7  
8  
9  
10  
11  
12  
13  
14  
15  
16  
17  
18  
19  
20  
21  
22  
23  
24  
25  
26  
27  
28  
29  
30  
31  
32  
33  
34  
35  
36  
37  
38  
39  
40  
41  
42  
43  
44  
45  
46



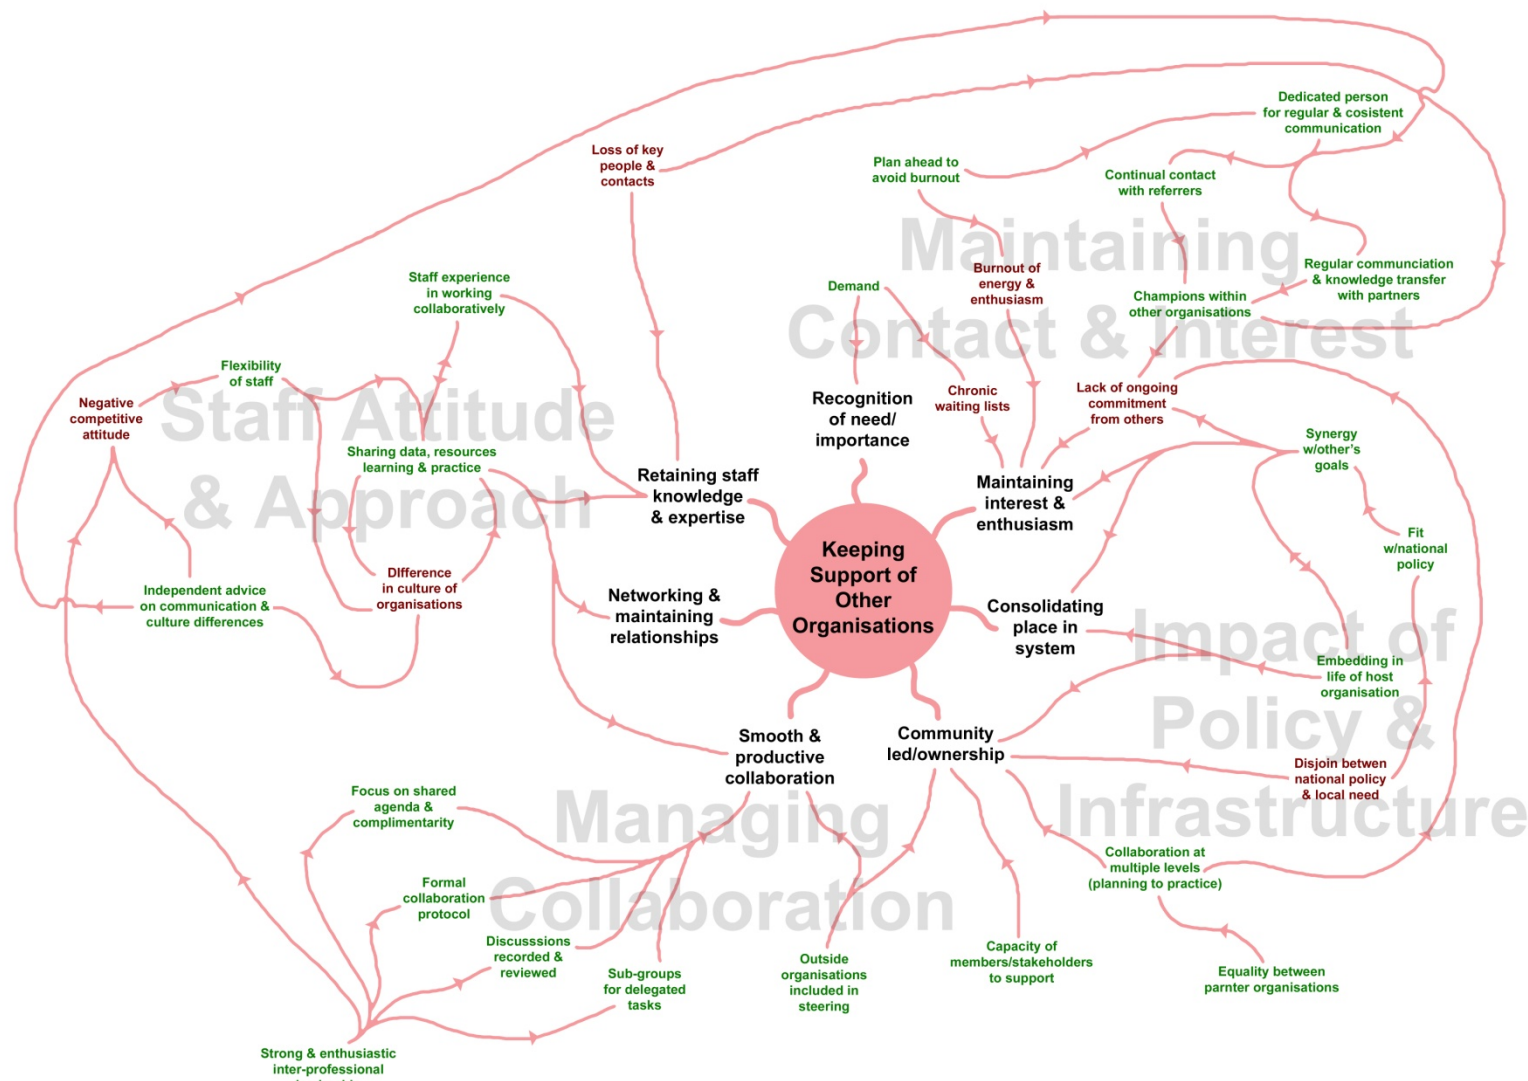

1  
2  
3  
4  
5  
6  
7  
8  
9  
10  
11  
12  
13  
14  
15  
16  
17  
18  
19  
20  
21  
22  
23  
24  
25  
26  
27  
28  
29  
30  
31  
32  
33  
34  
35  
36  
37  
38  
39  
40  
41  
42  
43  
44  
45  
46

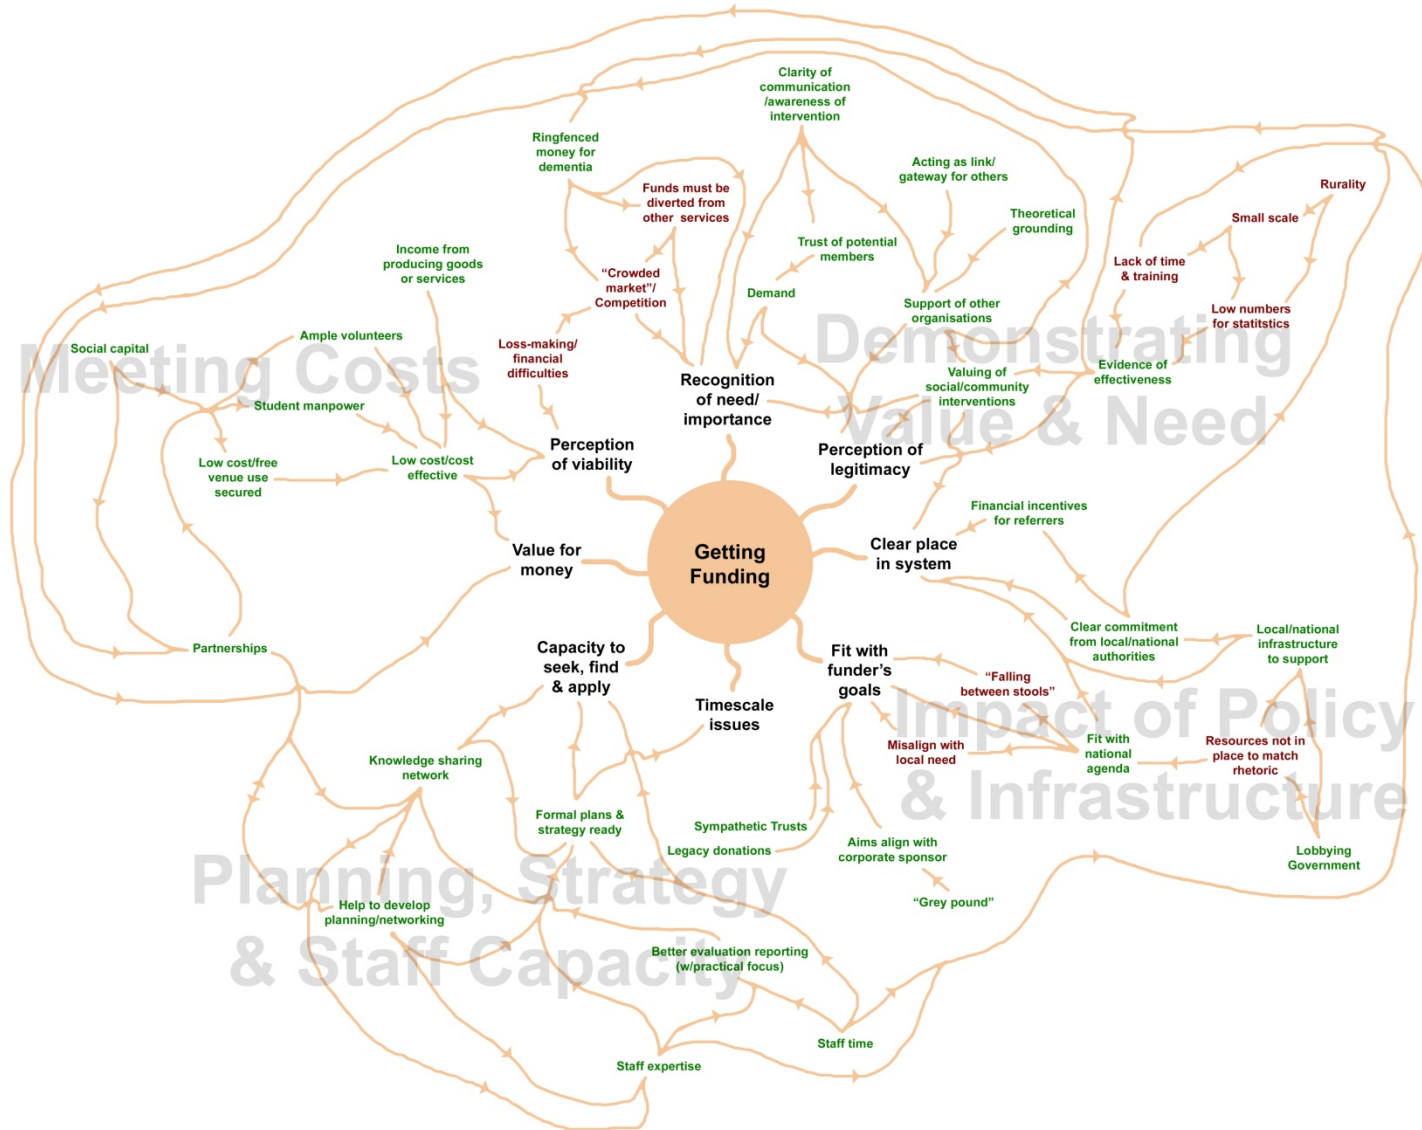

1  
2  
3  
4  
5  
6  
7  
8  
9  
10  
11  
12  
13  
14  
15  
16  
17  
18  
19  
20  
21  
22  
23  
24  
25  
26  
27  
28  
29  
30  
31  
32  
33  
34  
35  
36  
37  
38  
39  
40  
41  
42  
43  
44  
45  
46

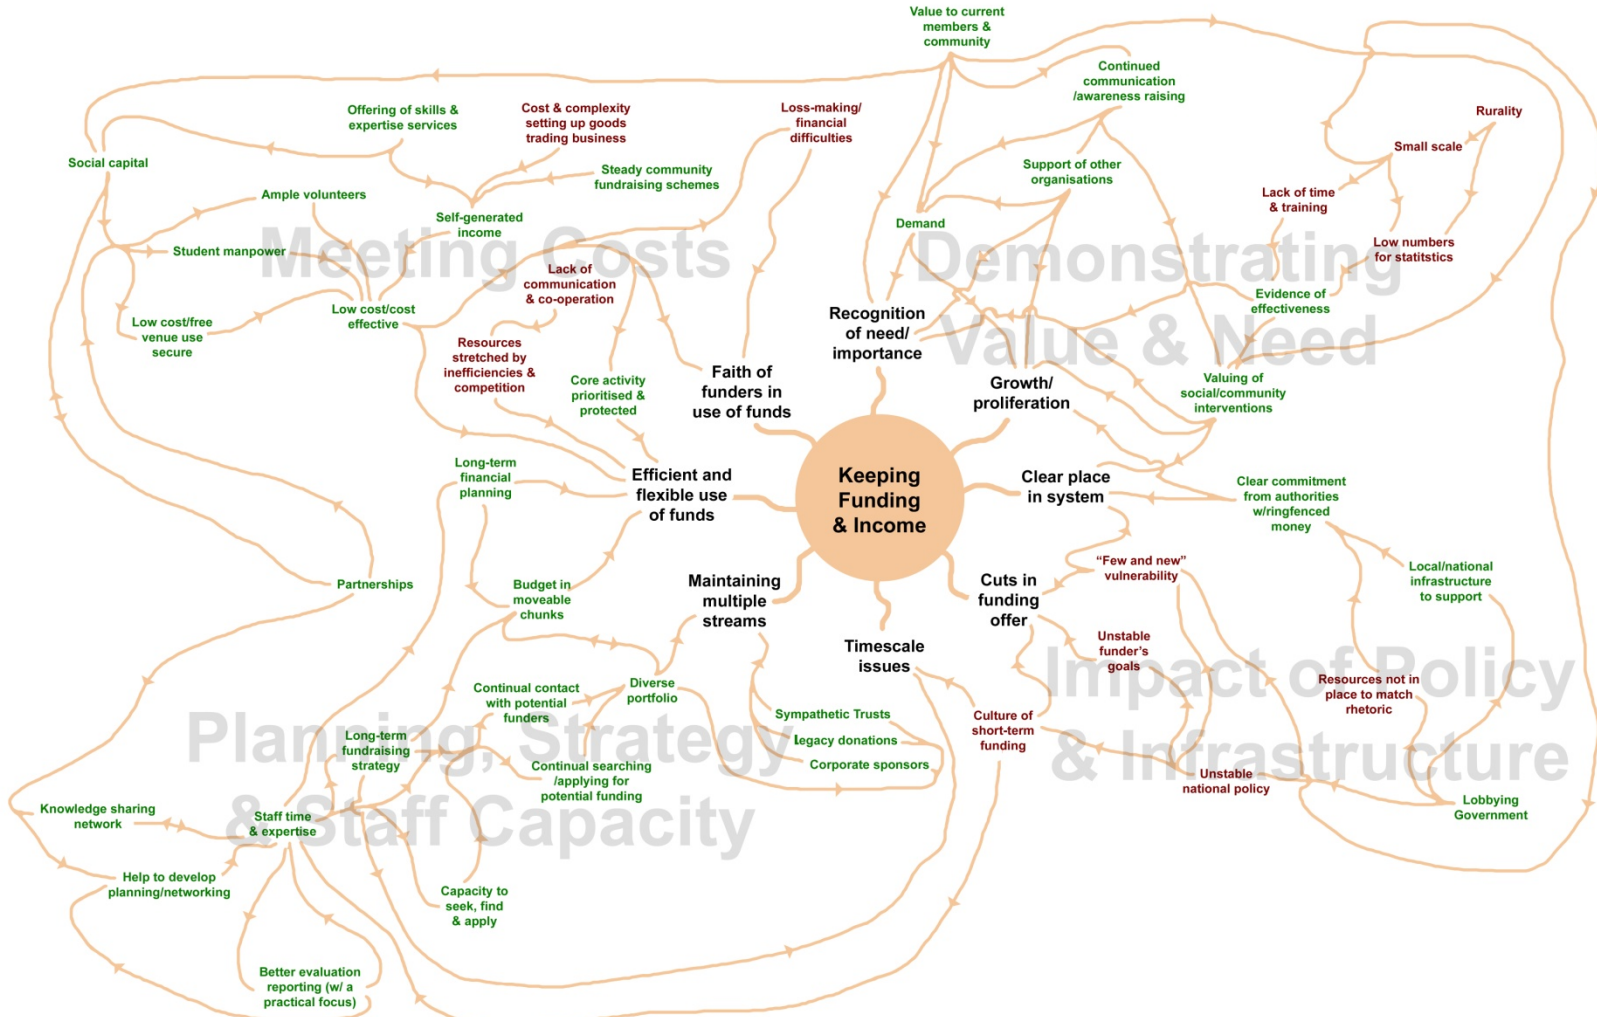



## Supplementary file 6: Full list of CMOCs

### Getting Members

CMOC 1: If the social aspect of an intervention is emphasised (C), then a wider range of people are likely to be interested (O), as a desire for social connection and activity is more universal than interest in a niche and potentially intimidating activity (M). [40,48,50,57,58,62,64,75]

CMOC 2: If food is offered (C), then people are more likely to attend (O), because the enjoyment of good food is universal and communal eating is associated with comfort, relaxation and social connection (M). [40,59]

CMOC 3: If facilitators are knowledgeable and empathetic, with good interpersonal skills (C), an initiative will be perceived as more welcoming and inclusive (O), as they will be better at understanding needs, engaging and building trust with potential members and their families (M). [36,37,38,39,40,41]

CMOC 4: If an initiative has an informal, unrushed and warm welcome on first visit (C), then people are more likely to want to return (O), as they are more likely to find the experience relaxing and enjoyable, not uncomfortable and intimidating (M). [40,42,43,44,45]

CMOC 5: If potential members have had poor previous experiences with groups or activities (dementia related or not) (C), they may not want to try another group or activity (O), because they think the experience will be similar and will want to avoid it (M). [37,41,46,47]

CMOC 6: If time is taken for personal contact, home visits or taster sessions with potential members (C), then people are more likely to come (O), as they will feel more familiar with the initiative and more trusting of those running it (M). [36,38,47,48,49,50]

CMOC 7: If an initiative is familiar and trusted, or local and well integrated with other organisations in the community (C), then people are more likely to come (O), as its links to familiar things that they trust will make it less intimidating (M). [37,41,42,48,51,52,53,54,55,56]

CMOC 8: If an intervention is based in familiar surroundings in, and open to, the community (C), then people are more likely to come (O), because potential members will find the normalcy, lack of stigma and chance for social integration appealing (M). [38,41,48,52,57,58,59,60,61,62]

CMOC 9: If a venue is dementia-friendly, comfortable and accessible (C), people are more likely to come (O), as they will not have concerns about comfort or access (M). [48,55,63,64]

CMOC 10: If an intervention is recommended by trusted family members and health professionals (C) people are more likely to go (O), as they will trust their judgement that it will be of benefit to them (M). [54,65]

CMOC 11: If discussion/training is held with families, carers and health professionals about their attitudes and beliefs towards dementia (C), they may be more likely to successfully encourage the person they care for to try an intervention (O), because they will understand dementia and be better able to overcome stigma and emotional barriers (M). [36,54,56,65]

CMOC 12: If evidence of an intervention's therapeutic benefits is made clear to families and care partners (C), then people are more likely to attend (O) as families and care partners will have confidence in the intervention so be more likely to encourage them to go (M). [38,41,75,78]

CMOC 13: If there is support for family/care partners alongside the intervention (C) then people are more likely to attend (O), as family and care partners will feel more able and inclined to attend themselves and encourage those they care for (M). [42,48,56,58,76,77,79]

CMOC 14: If an initiative is in a close-knit community with where there is stigma about dementia (C), then people and their families may be put off coming (O), as they may be concerned about confidentiality and word of their condition (or that of their family member) getting out (M). [47,56,62,73]

CMOC 15: If an initiative provides enjoyable, meaningful activities (C), then this is likely to attract members (O), as doing them will provide a reason and motive for many to attend initially, even if they stay on for other benefits (M). [41,44,45,50,64,67,70,71,72,83]

CMOC 16: If an initiative provides normalised, mainstream activities (C), then they are likely to attract members (O), as they will have resonance with people's previous interests, experience and history that would like to continue in some form (M). [46,48,57,58,65,67,71,81]

CMOC 17: If an initiative offers a range of different activities and services (C), then people are more likely to attend (O), as the initiative will appeal to a wider range of people with a range of needs (M). [47,48,62,84]

CMOC 18: If potential members' culture, ethnicity and language are acknowledged and catered for within the initiative (C), then they are more likely to come (O), as they will feel more comfortable and valued (M). [47,56,63,69,80]

CMOC 19: If there is a lack of diversity (of members and personnel) or pandering to stereotypes (C), then people may be put off coming (O), as they may have concerns about discrimination and stigma beyond dementia (M). [53,56,70,77]

CMOC 20: If the initiative is run by a religious organisation or in religious venue (C), then people may be put off coming (O), if they are not of that religion or cultural background (M). [56,82]

CMOC 21: If a group is too inclusive when not appropriate (C), this can alienate potential target members (O), as they will feel it will not be focussed on their specific needs (M). [37,60,62]

CMOC 22: If an initiative differentiates activities and roles for members by ability (C), then this can encourage potential members to attend (O), as they will feel there is an appropriate place for them rather than everyone being lumped in together (M). [48,79]

- 1  
2  
3 CMOC 23: If an intervention is risk averse or underestimates members' abilities and avoids challenge (C), then potential members will be  
4 put off (O), because they will see its activities as too easy, boring or not appropriate for them (M). [63,64,69,73]  
5  
6 CMOC 24: If an intervention is ability-focussed with tailored support and sensitive design of facilities (C), it is more likely to persuade  
7 potential members to attend (O) as they will be encouraged and supported to overcome physical impairments and negative attitudes (M).  
8 [43,58,62,64,69]  
9  
10 CMOC 25: When an intervention can offer practical advice, information and links to services that can help people (C), then it is more likely  
11 to attract members/service users (O), as they will be able to see that it has something to offer them that will meet their most immediate  
12 and pressing needs (M). [42,44,45,54,73,85]  
13  
14 CMOC 26: If safe, supported transfer from home to venue can be guaranteed (C), then people will be more likely to come (O), because  
15 they will be more likely to overcome any concerns about going out and getting to a group or activity session (M).  
16 [36,38,44,45,47,60,64,65,85,73]  
17  
18 CMOC 27: If the transport available isn't appropriate, reliable and respectful of people with dementia (C), then people will not come (O),  
19 as will not want to use that transport to get there (M). [37,47,49,64,76,77,82]  
20  
21 CMOC 28: If transport costs are significant and there is no financial support (C), then people will not come (O), as they will not be able to  
22 afford the transport costs (M). [36,38,56,59,64,76,78,82]  
23  
24 CMOC 29: If the venue is not in people's own neighbourhoods, is geographically distant or hard to reach (C) then people will not come (O),  
25 as they will find it difficult or intimidating to get there (M). [49,60,61,86]  
26  
27 CMOC 30: If an initiative forms links with community and public transport/taxi firms (C), then this will attract members (O), as they will  
28 find it less difficult or intimidating to travel to the venue (M). [48,76,77]  
29  
30 CMOC 31: If referrers are not made clearly aware of the added value, target population, ethos and activities of an intervention (C), then  
31 they will be less likely to refer appropriately (O), as they will not understand the value of it to their clients (M). [41,51,61,75,79]  
32  
33 CMOC 32: If there is constant contact and collaboration with potential referrers (C), then they are more likely to refer members (O), as  
34 they will build a relationship with the intervention that will mean they are better able to understand and remain alert to it (M).  
35 [46,51,54,55,74,75,79]  
36  
37 CMOC 33: If PR materials are not available in the right places or presented to people in the right circumstances (C), then they will not try  
38 an intervention (O), because they will not access those materials to find out about an intervention's potential value to them (M).  
39 [36,47,56,78,82]  
40  
41 CMOC 34: If PR materials are not in an understandable and appropriate format and tone (C), then people will not try an intervention (O),  
42 as they will find the materials too off-putting to engage with (M). [38,49,56,61,67,73,74,80]  
43  
44 CMOC 35: If PR materials do not make clear the specifics of an intervention, what to expect and how to attend (C), then people will be less  
45 likely to come (O), as they may be anxious due to uncertainties over what they will have to do and its value to them (M). [41,48,51,56,89]  
46  
47 CMOC 36: If an intervention has a stigma-free name that resonates with its target population (C), then people are more likely to come (O),  
48 as they will have confidence that they will be treated with respect and not suffer stigma when they go (M). [38,46,56,59,66,72]  
49  
50 CMOC 37: If the local community is fragmented with no local welfare organisation to distribute information (C), then people will be less  
51 likely to come (O), as it will be more difficult to get the word out to the right people in the community (M). [37,56,61]  
52  
53 CMOC 38: If in intervention forms links with existing groups, organisations and venues serving same demographic (C), then people will be  
54 more likely to come (O), as information and marketing materials will be more likely to reach them (M). [48,54,62,67,83]  
55  
56 CMOC 39: If all those involved in a person's care work together to collate and co-ordinate information (C), then people will be more likely  
57 to come (O) as information and marketing materials will reach them more efficiently (M). [36,61]  
58  
59 CMOC 40: If there is a dedicated linking, contact or health care adviser service (C) then people will be more likely to come (O) as  
60 information and marketing materials will reach them more efficiently (M). [36,38,44,45,47,56,75,80,88]  
61  
62 CMOC 41: If awareness of the needs of people dementia and of how an intervention can meet them is raised in the community in general  
63 (C), then people will be more likely to come (O), as stigma will be reduced and the value of the intervention communicated through word  
64 of mouth (M). [36,37,38,46,47,48,51,54,56,59,67,70,83,84,87]  
65  
66 CMOC 42: If GPs were given more incentive and guidance for social prescribing (C), then they would refer more people (O), because they  
67 would have a vested interest and confidence in doing so (M). [47,69]  
68  
69 CMOC 43: If there are significant bureaucratic problems with referring (such as chronic waiting lists, area border issues or the need for  
70 signed consent) (C), then professionals will be less likely to refer (O), as they will anticipate difficulties that will thwart their attempt to  
71 refer (M). [47,61,80,88]  
72  
73 CMOC 44: If GPs do not diagnose dementia until people are at later stages (C), then they will not refer people to community initiatives (O),  
74 as they will not see initiatives targeted towards those at earlier stages still able to live at home as appropriate for those they are  
75 diagnosing (M). [76,79]  
76  
77 CMOC 45: If an intervention waives the need for a diagnosis and accepts self-diagnosis (C), more people will come (O), as this will  
78 encourage a wider range of potential members and avoid excluding people who might benefit (M). [38,57,79,83]  
79  
80 CMOC 46: If an initiative's membership application process is not simple, clear, concise and easy (C), then people will not come (O), as the  
81 difficulty in applying will put them off joining (M). [38,44,45,74]

## **Keeping Members**

CMOC 47: If there is group cohesion and mutual trust between members (C), then a group is more likely to sustain (O), because members will feel more solidarity and investment in the group (M). [65]

CMOC 48: If friendships between members are encouraged, recognised and supported by staff and activities (C), then people are likely to keep coming (O), as they will feel more supported, comfortable and engaged, and able to support each other (M). [43,54,66,67,68]

CMOC 49: If an intervention is too focussed on agendas, rules and expectations (C), then people may stop coming (O), because they feel pressured, restricted and unable to relax and enjoy the social and emotional benefits important to them (M). [44,45,63,67,69,70,71]

CMOC 50: If the pace of activity through the day/session is too fast and strict (C), then people may stop coming (O), because they will struggle to stay engaged and will not enjoy themselves (M). [43,48,57,61,72]

CMOC 51: If ample informal time is made for socialising, peer support and feedback (C), then members are more likely to keep coming (O), as they will be more likely to feel comfortable and supported (M). [40,43,48,50,58,62,65,67,69,70,71,72,73,74,75]

CMOC 52: If there is opportunity to have communal eating and relaxing in a “cozy” environment (C), then members are more likely to keep coming (O), as this will provide comfort and foster group cohesion. [40,65]

CMOC 53: If there is regular social integration with others outside of the group (C), then members are more likely to keep coming (O), as they will feel more connected and less stigmatised (M). [38,41,47,48,49,52,54,59,61,62,66]

CMOC 54: If activities are mainstream and involve others without dementia (e.g. family/carers or locals from the community) (C), then members are more likely to keep coming (O), as they will feel activities are more normalised, reducing stigma and increasing enjoyment (M). [37,46,47,48,54,57,61,76]

CMOC 55: If an intervention is treated as a “dementia free zone” where talk is not about a person’s condition or medical issues (unless they want to raise them) (C), then people are more likely to keep coming (O), as they will find the environment more normalising and less stigmatising (M). [58,71]

CMOC 56: If an initiative contains projects which enable members to contribute to helping others in the community (C), then people are more likely to keep coming (O), because they will feel valued, useful and empowered (M). [47,67]

CMOC 57: If an initiative has links to existing mainstream public amenities (C), then people are more likely to keep coming (O), as they will recognise it gives them access to wider networks of support and friendship (M). [90]

CMOC 58: If members are involved in group decision-making and setting expectations (C), then people are more likely to keep coming (O), because they will feel ownership and investment in the group and confidence that the group is tailored towards their needs (M). [43,52,65,66,71,74,84]

CMOC 59: If regular feedback meetings are held to “tune” an intervention to the wants and needs of members (C), then people are more likely to keep coming (O), as activities will be kept appropriate and evolve to suit the membership (M). [41,44,45,48,55,67,91]

CMOC 60: If individuals are allowed to make their own decisions about what they do or don’t do during a session (C), then they will be more likely to keep coming (O), as they will feel their independence and freedom is respected and their voice heard (M). [36,40,43,63,91]

CMOC 61: If staff treat people respectfully as equals and relate personally (C), then people are more likely to keep coming (O), because they will feel staff and the group as a whole understands them and their needs (M). [40,42,44,45,46,63,65]

CMOC 62: If strategies are planned to review individual progress and involvement (C), then people are more likely to keep coming (O), as they are more likely to remain engaged and feel part of the group as a whole (M). [43,59,74]

CMOC 63: If personnel listen to and act upon regular input from family and caregivers (C), then people are more likely to keep coming (O), as they will appreciate the increased personalisation and sensitivity to their needs (M). [41,59,61,63,91]

CMOC 64: If an initiative does not pay attention to the needs of family and care partners (C), then people are less likely to keep coming (O), because there may be unaddressed logistical difficulties for the family or carers such as fit with work or transport issues (M). [38,44,45,47,54,60,61,73,78]

CMOC 65: If an initiative can open for more hours and help arrange transport (C), then people are more likely to come (O), as this will take the pressure off family members and carers to be flexible and arrange things, and bypass logistical difficulties (M). [44,45,48,49,50,57,78]

CMOC 66: If members who are no longer the target for the intervention stay on because there is no exit strategy or onward service capacity (C), then this can discourage target members from continuing to attend (O), as they may feel the service is too stretched to meet their needs (M). [41,43,61]

CMOC 67: If an initiative does not cater equally both for new members and older members whose condition has progressed (C), then this can discourage one group or the other from continuing to attend (O), as they will feel the initiative is more focussed upon the other group hence not appropriate for them (M). [66,71,75]

CMOC 68: If a group or activity is not matched with members’ interests and ability (C), then members may stop attending (O), as they will feel it is not appropriate for them or meeting their needs (M). [46,48,49,78]

CMOC 69: If activities involve a degree of challenge or learning (C), then members may be more likely to keep coming (O), as they will feel empowered and have a sense of achievement (M). [37,47,58,67,71,76]

1  
2  
3 CMOC 70: If an intervention pre-assesses members and plans strategies to meet their individual needs (C), then members are more likely  
4 to keep coming (O), because activities and support will be more likely to be appropriate for them (M). [43,44,45,57,59,60,74]

5 CMOC 71: If a venue is comfortable, familiar and stable, with adequate space and facilities (C), then people are more likely to keep coming  
6 (O), as they will feel relaxed, secure and at home there (M). [43,48,55,63]

7 CMOC 72: If a venue has multiple spaces within it (C), then people are more likely to feel comfortable there (O), as they will be able to  
8 move around and have a choice of activities, environments, social sub-groups or levels of involvement in activity (M). [63,89]

9 CMOC 73: If sessions are regular, routine and structured (C), then members will be more likely to keep coming (O), as they will feel  
10 comfortable and secure in the familiarity and reliability of proceedings (M). [38,40,43,47,48,65,72,73,75]

11 CMOC 74: If the venue and timings remain reliably the same (C) then members are more likely to keep coming (O), as it will become part  
12 of their routine (M). [43,48]

13 CMOC 75: If there is no continuity of staff or not enough staff to ensure reliable provision (C), then members may be less likely to keep  
14 coming (O), as they will find it difficult to have confidence and build trust in the intervention and its staff (M). [36,47,66]

15 CMOC 76: If an intervention works to a tried and tested model (C), then members are more likely to feel secure (O), as that model will  
16 provide a structure that works (M). [61]

17 CMOC 77: If there are not new ideas and some variety planned across the calendar (C), then members may stop coming (O), because they  
18 may feel the group/activities have become stale and boring (M). [37,43,67]

### 21 **Getting Staff and Volunteers**

22  
23 CMOC78: If an initiative engages in community outreach such as talks and training with other groups and at events (C), then this will help  
24 attract volunteers (O), because the initiative's profile will be raised with wide range of stakeholders in the community (M). [46,59,83]

25 CMOC79: If awareness is raised in the community about the activities and benefits of a what an initiative does (C), then it will be more  
26 likely to attract appropriate personnel (O), as potential staff and volunteers will understand its value to service users and what they can do  
27 to help (M). [56,61,89,91]

28 CMOC80: If an initiative has links with like-minded groups (C), then they may get help finding and training staff volunteers (O), as they will  
29 be able to share ideas and practice on what is successful (M). [50,91]

30 CMOC81: If an initiative approaches established community organisations and authorities (third sector, faith or local authority) (C), they  
31 are more likely to get help with finding volunteers (O), as these organisations are likely to have access to an existing volunteer workforce  
32 or contacts that could help (M). [69,77]

33 CMOC82: If an initiative has links with professional, third sector or educational bodies (C), they may help with creating a more skilled  
34 workforce (O), because they may have the remit provide training for staff and volunteers (M). [80,84]

35 CMOC83: If an initiative is hosted by a public venue or local club (C), this may help with staffing (O), as the venue or club may have existing  
36 staff who can help with running things (M). [48,58,67,69]

37 CMOC84: If a community has an educational establishment running a health and social-care course (C), this could be a source of  
38 volunteers (O), as students/trainees will have the drive and interest to work with social-care-related activities to gain experience (M).  
39 [62,65,91,92,93]

40 CMOC85: If a formal partnership is agreed with an educational establishment (C), this will guarantee regular volunteers during term time  
41 (O), as work placements can be formalised as part of students' courses (M). [65,92,93]

42 CMOC86: If the initiative is in a rural area (C), then it can be more difficult to recruit volunteers (O), as there may be no educational  
43 establishment or body of students/trainees to recruit from (M). [53,83]

44 CMOC87: If the initiative is in a rural area (C), then it may take more time to recruit volunteers (O), as familiarity and personal contacts  
45 tend to be more important in small, close-knit communities (M). [83]

46 CMOC88: If the initiative is in a rural area (C), then it may be more difficult to recruit staff and volunteers (O), as they may not live  
47 geographically near members or the venue, presenting extra logistical challenges (M). [53,83]

48 CMOC89: If a community has a population of active retirees (C), this could be a source of volunteers (O), as they are likely to have time and  
49 experience conducive to volunteer work with older people (M). [56]

50 CMOC90: If there are friends and family of current or previous members/service users that are available (C), this could be a source of  
51 volunteers (O), as they will understand the value of the intervention and already be invested in it (M). [56,81]

52 CMOC91: If there are no specialist elements to the intervention or members with high care needs (C), then personnel do not need to have  
53 professional training or expertise (O), as they will still be able to understand and deliver the intervention for the benefit for service users  
54 (M). [58,72]

55 CMOC92: If in intervention has more than one skilled facilitator (C), then it can benefit more members (O), as the workload can be split  
56 and more one-on-one support for members offered (M). [71,73,75]

57 CMOC93: If an initiative's leaders/co-ordinators have good communication and interpersonal skills (C), then it is more likely to be  
58 successful (O), as they will engage and inspire other staff and volunteers (M). [38,51,61,79]

CMOC94: If volunteers' availability and interpersonal skills are inconsistent (C), an initiative is less likely to be successful (O), as it will not have a reliable workforce to run it (M). [73]

CMOC95: If funded support worker roles exist (C), then a reliable volunteer workforce is more likely (O), because they can help build a volunteer base (M). [50]

### **Keeping Staff and Volunteers**

CMOC 96: If personnel are flexible and open to new ways of working (C), then they are more likely to work effectively (O), as they will be more likely to collaborate with others, sharing knowledge, experience, innovation, resources and effective working practices (M). [59,60,79,93]

CMOC 97: If personnel have advice or training to boost communication and collaboration skills (C), then they are more likely to work effectively (O), as they will be more able to share knowledge, experience, innovation, resources and effective working practices (both internally and externally) (M). [60,76]

CMOC 98: If personnel are driven and able to deal with stress (C), then they are more likely to continue (O), as they will be able to overcome the challenges and demands of running an intervention (M). [61]

CMOC 99: If facilitators are not able to take time for self-care (C), then they will burn out (O), as running an intervention can be challenging and emotionally demanding (M). [43,75]

CMOC 100: If time is taken to plan strategies for recruitment, training, support, retention and balance of personnel at the start (C), then personnel problems and burn out can be avoided (O), as planners will have thought through the challenges involved and put in place actions to tackle them (M). [70,74]

CMOC 101: If personnel have access to experienced tips and guidance (from materials or individuals) throughout an intervention's start-up period (C), they are more likely to continue (O), as they will be better informed to resolve problems and avoid common pitfalls (M). [37,56]

CMOC 102: If there is an ethos of inclusion, community, camaraderie and helping people (C), then personnel will be more likely to continue (O), as they will feel enjoyment and benefit from this ethos along with members/service users (M). [52,58,75]

CMOC 103: If there are a range of roles and levels of involvement for volunteers (C), they are more likely to be satisfied with volunteering (O), as they can do something that suits them and their abilities that they are comfortable with and interested in (M). [84]

CMOC 104: If volunteers are included in professional activities and training (C), they are more likely to be satisfied with volunteering (O), as they will feel their skills and development are valued by the initiative (M). [38]

CMOC 105: If there is limited and inconsistent funding (C), then an intervention is less likely to be able to retain paid staff (O), because their jobs and the long-term future of the intervention will not be secure (M). [73,79,84]

CMOC 106: If personnel roles are not secure (C), then an initiative is less likely to sustain (O), because turnover will be high and key individuals with key experience and contacts will be lost (M). [67,79,84]

CMOC 107: If volunteers are seen by authorities and commissioners as "coming for free" (C), then they are less likely to continue (O), as they will feel un-valued with their time and expertise taken for granted (M). [87]

CMOC 108: If unpaid volunteers are treated as a replacement for professional staff (C), then staff are less likely to continue (O), as they will feel their roles are undermined and un-valued (M). [51]

CMOC 109: If financial assistance is made available for volunteer groups (C), then they are more likely to continue (O), as they will have the resources and support to run more activities (M). [50]

### **Getting Support of Other Organisations**

CMOC 110: If there is a higher public awareness and profile for people living with dementia (C), then dementia-targeted interventions are more likely to get support from other organisations, services and amenities (O), because there will be more recognition of their importance for society in general (M). [39,84,90]

CMOC 111: If the added value of an intervention is made clear to other organisations (C), then it is more likely to get support and find a place in the local care offer (O), because other organisations will understand its value to their members/service users (M). [41,42,50,54,55,61,75,79,86]

CMOC 112: If an intervention engages with research and evaluation to gather evidence of benefits (C), then it is more likely to get support (O), because the resulting reports will lend it legitimacy in the eyes of other organisations (M). [37,70,80]

CMOC 113: If it is made clear that an intervention is based upon a strong evidence-based model (C), then it is more likely to get support (O), because that model will lend it legitimacy in the eyes of other organisations (M). [41,79,86]

CMOC 114: If an intervention involves the local community in its steering (C), then it likely to attract further community support (O), as key people and organisations in the community with wider links will feel a sense of ownership and investment (M). [84]

CMOC 115: When there are a range of organisations (e.g. local authority, third sector, faith, business and education) active in the community (C), they may be willing to offer support if asked (O), as they may have a remit to share resources such as venue space and facilities, equipment, training, staff, volunteers or contacts (M). [48,52,58,62,65,67,69,77,80,92,93]



1  
2  
3 CMOC 116: If an intervention model is flexible (C), then it has a better chance of finding support (O), as it can accommodate being run at a  
4 range of venue types in, a range of ways, by a range of host organisations (M). [69,71,72,75]

5 CMOC 117: If an existing social care business is approached (C), they may support, host or partner an intervention (O), as it may help them  
6 attract clients/customers (M). [75]

7 CMOC 118: If training and guidance is available from a public or third sector authority (C), this may help gain further support (O), as it will  
8 help an intervention develop its skills and expertise in marketing, networking and outreach (M). [46]

9 CMOC 119: If an intervention is based in a civic centre or public venue (C), then it is more likely to get support from other local  
10 organisations (O), because it will be visible to others sharing that space (M). [59,79]

11 CMOC 120: If an intervention focuses on building links with local organisations and services (C), it is more likely to get support (O), as it is  
12 easier to bring together a network of those who are already invested in the same community and some links will already exist (M).  
13 [41,42,62]

14 CMOC 121: If an intervention is run at a public venue or local club (C), then links with others in the community are easier to forge (O), as  
15 there will be an existing network of venue/club users and contacts that the intervention can access (M). [41,48,58,62]

16 CMOC 122: If a group or activity is small scale (C), then it can be hard to get support (O), as it is more difficult for them to network with  
17 larger organisations, authorities, movers and shakers (M). [77]

18 CMOC 123: If struggling groups in the same area merge (C), they can support each other (O), because they can pool resources, personnel,  
19 knowledge and ideas (M). [67]

20 CMOC 124: If links are forged with a national network of similar interventions (C) then they can support each other (O), because they can  
21 pool resources, knowledge, contacts and strategy (M). [42]

22 CMOC 125: If a locality has other organisations working with the same target population (C), then in intervention may struggle to get  
23 support (O), as those other organisations and their supporters may perceive the intervention as competition (M). [41,79]

24 CMOC 126: If an intervention has a clear place in the local offer without service/role overlap (C), then it is more likely to get the support of  
25 others (O), because they will see it as complementing their service not competing with it (M). [42,51]

26 CMOC 127: If other organisations are informed, invited to meetings and asked for help and advice early on (C), then an intervention is  
27 more likely to get the support (O), because they will feel respected and invested in the success of the new intervention (M). [51,61,79,84]

28 CMOC 128: If groups involve professionals already working with individual members (e.g. case workers, carers) in activities (C) then they  
29 are more likely to increase support from professional services (O), because professionals will understand the value of the intervention to  
30 their service-users and feel invested in its success (M). [79]

31 CMOC 129: If an intervention acts as a hub for/gate/link to other services and is tuned to dovetail with them (C), then it is more likely to  
32 get the support of those services (O), because they will see the intervention as being of help to them (M). [42,60,61,72,86,88]

33 CMOC 130: If an intervention offers a benefit or resource to the wider community (C), then it is more likely to get the support of other  
34 community organisations (O), as they will see it as benefiting their members/service users (M). [41,46,67,70]

35 CMOC 131: If an intervention offers to do reciprocal work, sharing knowledge and resources with other organisations (C), then it is more  
36 likely to get their support (O), as they will see the benefit to working together (M). [41,46,67,70]

37 CMOC 132: If there is a disjoin between national policy and local need (C), then initiatives can struggle to get and keep support (O),  
38 because by adhering to one they will neglect the other, alienating would-be supporters (M). [51]

39 CMOC 133: If there were ring-fenced funding to support dementia-targeted community initiatives as part of national policy (C), then small,  
40 local initiatives would get support (O), as there would be incentives for health services and LAs to help them (M). [39,59,69]

41 CMOC 134: If health and social care authorities commissioned services to work with community initiatives (C), then small, local initiatives  
42 would get support (O), because it would ensure the collaboration of services and organisations at different levels (M). [47,50,77]

43 CMOC 135: If health pathways were developed around existing social networks (C), then small, local initiatives would get support (O), as it  
44 would encourage more community collaboration and co-production with health services (M). [47]

45 CMOC 136: When national and official organisations take the lead in working with small, local initiatives (C), this helps more consistent  
46 provision of local services across regions (O), because there is more joined-up strategic direction of what is on offer and available (M).  
47 [39,50]

48 CMOC 137: When national and official organisations show support for the involvement of private sector partners (C), then small, local  
49 initiatives are more likely to get support (O), as it provides private sector organisations with the incentive, tools and guidance to work in  
50 partnership (M). [39]

### 51 **Keeping Support of Other Organisations**

52 CMOC 138: If communication is not maintained (C), then support of others can drop away (O), as interest and enthusiasm may dwindle in  
53 tandem with an intervention's contact and visibility to its collaborators (M). [41,55]

54 CMOC 139: If information sharing and knowledge transfer is not maintained (C), then support of others can drop away (O), as  
55 communication and administration problems may arise between collaborating parties (M). [44,45,77]

1  
2  
3 CMOC 140: If there is a designated person with responsibility for regular and consistent communication with other organisations (C), then  
4 continued support is more likely (O), as they will have the time to pay attention to maintaining collaborative working, and build experience  
5 and relationships with key people in doing so (M). [41,50]

6 CMOC 141: If relationships with key people in other organisations are maintained (C), then support of those organisations is more likely to  
7 continue (O), as an intervention will create “champions” within those organisations (M). [39,51]

8 CMOC 142: If staff turnover (internal and external) is high (C), then support can be lost (O), because communication and relationships with  
9 contacts and “champions” can suffer due to the loss of key personnel (M). [67,79,84]

10 CMOC 143: If there is a difference in culture between collaborating organisations (C), then effective support can be hindered (O), as  
11 personnel from each organisation will not be working with the same focus and goals (M). [41,51,79]

12 CMOC 144: If groups or sectors have a negative or competitive attitude towards each other (C), then effective support can be hindered  
13 (O), as it creates problems sharing data, learning and resources (M). [41,76,77]

14 CMOC 145: If an intervention makes effort to learn about and embed in the life of a supporting organisations (C), then it is more likely to  
15 maintain support (O), as it will understand that host organisation better and share the same goals (M). [70]

16 CMOC 146: If staff (internal and external) are experienced in working collaboratively (C), then an intervention is more likely to maintain  
17 support (O), as staff will be more skilled, flexible and understanding when working with those from another organisation (M). [79]

18 CMOC 147: If independent advice on communication (internal and external) and collaboration is available (C), then an intervention is more  
19 likely to maintain support (O), as leaders, staff and volunteers will become more skilled at networking and working together while  
20 overcoming differences in culture (M). [60,79]

21 CMOC 148: If there are multiple forms of strong inter-professional leadership (C), then collaboration is likely to be more successful (O),  
22 because there will be mutual learning with leaders setting an example for others to follow (M). [51,59,79,86]

23 CMOC 149: If time is taken to plan well early on (C), then support from others is more likely to be maintained (O), as personnel will have  
24 thought through the challenges involved in maintaining energy and enthusiasm and put in place actions to tackle them (M). [70]

25 CMOC 150: If there is a steering group including outside organisations (C), then support is more likely to be maintained (O), as steering will  
26 include a focus on shared agenda and complementarity with outside organisations (M). [51]

27 CMOC 151: If a partnership is not equal and collaborating at all stages, from planning to practice (C), then this could hinder support (O), as  
28 one party may feel the other is not contributing what it should while the other feels dictated to, creating friction (M). [44,45]

29 CMOC 152: If a collaboration protocol with supporting organisations is drafted and discussions logged and reviewed (C), then support is  
30 more likely to be maintained (O), because all parties will have the chance air and resolve issues and have clarity over expectations and  
31 mutual goals (M). [41,44,45,61,70]

### 32 33 34 **Getting Funding and Income**

35 CMOC 153: If potential funders are not clear on what a service/intervention is and does (C), then they will be less likely to fund it (O),  
36 because they do not understand its purpose or value (M). [89]

37 CMOC 154: If potential funders are made aware of the added value and benefit of an intervention (C), then they will be more likely to fund  
38 it (O), because they will recognise it has something uniquely valuable to offer service users (M). [61,70]

39 CMOC 155: If communication and publicity is regularly disseminated to potential funders (C), then they are more likely to fund in the  
40 future (O), as they will be familiar with and alert to the work of an intervention (M). [94]

41 CMOC 156: If recognised and standardised materials (e.g. Alzheimer’s Society materials, PQASSO or Social Return on Investment  
42 evaluation) are used to gather and communicate evidence of worth (C) then funders are more likely to fund (O) as they will see that  
43 evidence as more legitimate than anecdotal accounts (M). [80]

44 CMOC 157: If potential funders are made aware of links with and support from other organisations (C), then they’re more likely to fund (O)  
45 because they are likely to view the support of others as adding legitimacy to a community initiative (M). [70]

46 CMOC 158: If corporate organisations are made aware of how an intervention aligns with its aims (C), then they will be more likely to  
47 sponsor or donate (O), as they will feel supporting that intervention helps progress their goals (M). [94]

48 CMOC 159: If an intervention develops its skill in networking and communicating with other organisations (C), then it is more likely to find  
49 funding (O), as it will learn of funding opportunities through a wider network of support and contacts (M). [46]

50 CMOC 160: If awareness of the wants and needs of people with dementia is raised in society in general (C), then funders are more likely to  
51 support a dementia-targeted initiative (O), as they are more likely to recognise that it meets the needs of service-users (M). [39,46]

52 CMOC 161: If there is demand for an intervention from service users and referrers (C), then funders are more likely to fund (O), as they will  
53 recognise that it is meeting people’s needs (M). [46]

54 CMOC 162: If potential members/service users are not clear on what a service/intervention is and does (C), then they will be less likely to  
55 try it (O), because they do not understand it’s purpose or value to them (M). [41,51,56,89]

56 CMOC 163: If potential referrers are not clear on what a service/intervention is and does (C), then they will not refer people to it (O),  
57 because they do not understand its purpose or value to their service users (M). [41,51,61,75,79]



- 1  
2  
3 CMOC 164: If an intervention is perceived as more expensive than alternatives on offer without offering significant added value (C), funders will be less likely to fund (O), as they will not see it as value for money (M). [79,80,87,95]  
4  
5 CMOC 165: If an initiative is perceived as having financial difficulties (C), potential funders are less likely to fund (O), as they will see it as a high risk funding decision (M). [56,61]  
6  
7 CMOC 166: If an initiative has co-operative working arrangements with other community organisations (C), then this can help keep costs low (O), as they can agree to share resources (venue, personnel, equipment, training etc.) (M). [70,75,76,78,80,93]  
8  
9 CMOC 167: If an initiative can generate some income through offering services to others(C), then funders are more likely to have confidence in it (O), as they will perceive it be to more viable (M). [94]  
10  
11 CMOC 168: If funders are made aware of the support from other organisations for a new initiative (C), they are more likely to fund (O), as they will perceive the initiative as being more viable due to that support (M). [70]  
12  
13 CMOC 169: If initiative can act as a gate/link for other services and community organisations (C), then it is more likely to get funding (O), as it will be seen as of value to enhancing existing services and organisations (M). [60,61]  
14  
15 CMOC 170: If intervention personnel have good, up-to-date knowledge of funding processes and policy (C), they are more likely to get funding (O), because they will understand how to plan and implement an effective strategy to seek and find it (M). [55,61,86]  
16  
17 CMOC 171: If like-minded groups share successful ideas (C), they are more likely to find funding solutions (O), because they will be able to learn from each other about what works or doesn't work (M). [80,91]  
18  
19 CMOC 172: If interventions include more practical detail on resources, costs and funding as part of standard reporting/evaluation (C), then others in the future will be more likely to find funding solutions (O), as they can learn from the experience of others about what works or doesn't work (M). [37]  
20  
21 CMOC 173: If authoritative help is available to develop personnel's expertise regarding business planning and networking (C), then an intervention is more likely to find funding solutions (O), because personnel will be better at developing and implementing a strategy to do so (M). [46]  
22  
23 CMOC 174: If an intervention has a realistic strategy to attract donations and grants (C), then it is more likely to find funding solutions (O), as personnel will have thought through the challenges involved and put in place actions to tackle them (M). [94]  
24  
25 CMOC 175: If an intervention has a business case ready (C), then it is more likely to secure funding (O), as it will be able to respond quickly when a window of opportunity opens with a potential funder (M). [60]  
26  
27 CMOC 176: When an initiative is in a more rural area (C), it is likely to be small scale with fewer members/service users (O), because the population is geographically diffuse without the infrastructure to gather together easily (M). [84]  
28  
29 CMOC 177: If an initiative is small-scale (C), it will not be able to robustly demonstrate demand, effectiveness and H&SC savings (O), because it's number or members/service users will not be enough to capture robust evidential statistics (M). [84]  
30  
31 CMOC 178: If funders demand robust statistical evidence before funding (C), then small and rural groups and activities will be disadvantaged (O), because they will not have the numbers and resources to produce this (M). [50,84,91]  
32  
33 CMOC 179: If an initiative is small-scale (C), it will be disadvantaged in securing funding (O), as it will have fewer personnel with more limited time and resources to continually apply (M). [84]  
34  
35 CMOC 180: If an intervention is aligned with national agenda (C), then it is more likely to get funding (O), because the policy and infrastructure will be in place to support it (M). [42,55,59,84]  
36  
37 CMOC 181: If national policy is not consistent with local need (C), then local groups serving those needs will struggle to attract funding (O), as funders will not see their cause as a priority (M). [41,51,84]  
38  
39 CMOC182: If the national (and by extension funders') agenda focuses on medical needs and costs over social and emotional needs (C), then community-focussed groups and activities will struggle to get funding (O), as funders will not understand their benefits or see their cause as a priority (M). [77,80,86,91,95]  
40  
41 CMOC 183: If intervention providers, service users and families speak out about their needs (C), providers may be more likely to get funding for local community-focussed services (O), as authorities will feel pressure to change the national agenda to meet people's needs (M). [96]  
42  
43 CMOC 184: If resources are not allotted and ring-fenced to match changes in national or local policy (C), there will be no benefit to community interventions (O), as funders will not have the resources to invest in making a difference in practice (M). [39,50,76,87]  
44  
45  
46  
47  
48  
49  
50  
51  
52  
53

### **Keeping Funding and Income**

- 54 CMOC 185: If communication and publicity is regularly disseminated to funders (C), then they are more likely to fund again in the future (O), as they will be kept informed and alert to the continuing work and benefits of an intervention (M). [94]  
55  
56 CMOC 186: If publicity and networking is pared back to cut costs (C), this could negatively impact changes of finding continued funding (O), as an intervention will drop off funders' "radar" and risk being forgotten or overlooked (M). [94]  
57  
58 CMOC 187: If funders are made aware of a growth in demand for an intervention from service users and referrers (C), then they are more likely to continue to fund (O), as they will recognise that it is meeting people's needs (M). [46,55]  
59  
60

- 1  
2  
3 CMOC 188: If funders are made aware of accruing evidence of the added value and benefit of an intervention (C), then they will be more  
4 likely to fund it (O), because they will recognise it has something uniquely valuable to offer service users (M). [61,70]  
5  
6 CMOC 189: If groups and organisations do not communicate and work together (C), then existing funds will not go as far (O), as available  
7 financial resources will be split and lost on inefficiencies and duplication of services (M). [76]  
8  
9 CMOC 190: If an initiative has co-operative working arrangements with other community organisations (C), then this can help keep costs  
10 low (O), as they can agree to share resources (venue, personnel, equipment, training etc.) (M). [70,75,76,78,80,93]  
11  
12 CMOC 191: If an initiative has multiple and diverse income streams (C), then it is more likely to maintain a proportion funding (O), because  
13 if one stream stops, others will still be available. [70,80,84]  
14  
15 CMOC 192: If an initiative's budget is broken down into identified parts (C), then it is more likely to be able to weather changes in funding  
16 (O), as what can be used to pay for what is more flexible, and core activity can be prioritised (M). [70,84,94]  
17  
18 CMOC 193: If financial planning is done with a focus on the long-term (C), then an initiative is more likely to weather changes in funding  
19 (O), as it will be able to spread existing funds more effectively by allotting spending carefully (M). [44,45,70]  
20  
21 CMOC194: If an intervention has a realistic strategy to continually attract donations and grants (C), then it is more likely to find funding  
22 solutions (O), as personnel will have thought through the challenges involved and put in place actions to tackle them (M). [94]  
23  
24 CMOC 195: If there is no long-term funding available (C), this will place significant demands on the time and resources of personnel (O),  
25 because they will need to continually seek and apply for fresh funding (M). [84]  
26  
27 CMOC 196: If an initiative is small-scale (C), it will be disadvantaged in continuing to secure funding (O), as it will have fewer personnel  
28 with more limited time and resources to continually seek and apply (M). [84]  
29  
30 CMOC 197: If an initiative continually and systematically seeks new income streams (C), then it is more likely to maintain a proportion  
31 funding (O), because if one stream stops, it will be more likely to have multiple other streams available (M). [70,80,84]  
32  
33 CMOC 198: If funders objectives are always short-term and keep changing (C), then deep learning on what works for services users and  
34 communities will be lost (O), as "quick win" projects will be encouraged over support for existing and experienced initiatives (M). [51,79]  
35  
36 CMOC 199: If funders only support short-term or new projects (C), then initiatives will struggle to become established long-term (O), as  
37 they will be unable to plan ahead with confidence or have time to learn how activity can be supported sustainably (M). [77,86,87]  
38  
39 CMOC 200: If resources are not allotted and ring-fenced to match changes in national or local policy (C), there will be no benefit to  
40 community interventions (O), as funders will not have the resources to invest in making a difference in practice (M). [39,50,76,87]  
41  
42 CMOC 201: If intervention providers, service users and families speak out about their needs (C), providers may be more likely to get  
43 funding for local community-focussed services (O), as authorities will feel pressure to change the national agenda to meet people's needs  
44 (M). [96]  
45  
46  
47  
48  
49  
50  
51  
52  
53  
54  
55  
56  
57  
58  
59  
60

## RAMESES publication standards (realist synthesis) checklist

(After BMC Medicine 2013, 11:21 <http://www.biomedcentral.com/1741-7015/11/21>)

| Items required when reporting a realist synthesis |                                       |                                                                                                                                                                                                                                                                                                                                                                                                                                                                                                                                                           | Reported on page(s) |
|---------------------------------------------------|---------------------------------------|-----------------------------------------------------------------------------------------------------------------------------------------------------------------------------------------------------------------------------------------------------------------------------------------------------------------------------------------------------------------------------------------------------------------------------------------------------------------------------------------------------------------------------------------------------------|---------------------|
| 1                                                 |                                       | In the title, identify the document as a realist synthesis or review                                                                                                                                                                                                                                                                                                                                                                                                                                                                                      | 1,2                 |
| ABSTRACT                                          |                                       |                                                                                                                                                                                                                                                                                                                                                                                                                                                                                                                                                           |                     |
| 2                                                 |                                       | While acknowledging publication requirements and house style, abstracts should ideally contain brief details of: the study's background, review question or objectives; search strategy; methods of selection, appraisal, analysis and synthesis of sources; main results; and implications for practice.                                                                                                                                                                                                                                                 | 2                   |
| INTRODUCTION                                      |                                       |                                                                                                                                                                                                                                                                                                                                                                                                                                                                                                                                                           |                     |
| 3                                                 | Rationale for review                  | Explain why the review is needed and what it is likely to contribute to existing understanding of the topic area.                                                                                                                                                                                                                                                                                                                                                                                                                                         | 4                   |
| 4                                                 | Objectives and focus of review        | State the objective(s) of the review and/or the review question(s). Define and provide a rationale for the focus of the review.                                                                                                                                                                                                                                                                                                                                                                                                                           | 5                   |
| METHODS                                           |                                       |                                                                                                                                                                                                                                                                                                                                                                                                                                                                                                                                                           |                     |
| 5                                                 | Changes in the review process         | Any changes made to the review process that was initially planned should be briefly described and justified.                                                                                                                                                                                                                                                                                                                                                                                                                                              | N/A                 |
| 6                                                 | Rationale for using realist synthesis | Explain why realist synthesis was considered the most appropriate method to use.                                                                                                                                                                                                                                                                                                                                                                                                                                                                          | 6                   |
| 7                                                 | Scoping the literature                | Describe and justify the initial process of exploratory scoping of the literature.                                                                                                                                                                                                                                                                                                                                                                                                                                                                        | 6-7                 |
| 8                                                 | Searching processes                   | While considering specific requirements of the journal or other publication outlet, state and provide a rationale for how the iterative searching was done. Provide details on all the sources accessed for information in the review. Where searching in electronic databases has taken place, the details should include, for example, name of database, search terms, dates of coverage and date last searched. If individuals familiar with the relevant literature and/or topic area were contacted, indicate how they were identified and selected. | 7-8                 |
| 9                                                 | Selection and appraisal of documents  | Explain how judgements were made about including and excluding data from documents, and justify these.                                                                                                                                                                                                                                                                                                                                                                                                                                                    | 8-9                 |
| 10                                                | Data extraction                       | Describe and explain which data or information were extracted from the included documents and justify this selection.                                                                                                                                                                                                                                                                                                                                                                                                                                     | 8-9                 |
| 11                                                | Analysis and synthesis processes      | Describe the analysis and synthesis processes in detail. This section should include information on the constructs analyzed and describe the analytic process.                                                                                                                                                                                                                                                                                                                                                                                            | 9                   |
| RESULTS                                           |                                       |                                                                                                                                                                                                                                                                                                                                                                                                                                                                                                                                                           |                     |
| 12                                                | Document flow diagram                 | Provide details on the number of documents assessed for eligibility and included in the review with reasons for exclusion at each stage as well as an indication of their source of origin (for example, from searching databases, reference lists and so on). You may consider using the example templates (which are likely to need modification                                                                                                                                                                                                        | 8                   |

| Items required when reporting a realist synthesis |                                                       |                                                                                                                                                                                                                                                                                                                                                                   | Reported on page(s) |
|---------------------------------------------------|-------------------------------------------------------|-------------------------------------------------------------------------------------------------------------------------------------------------------------------------------------------------------------------------------------------------------------------------------------------------------------------------------------------------------------------|---------------------|
|                                                   |                                                       | to suit the data) that are provided.                                                                                                                                                                                                                                                                                                                              |                     |
| 13                                                | Document characteristics                              | Provide information on the characteristics of the documents included in the review.                                                                                                                                                                                                                                                                               | 10                  |
| 14                                                | Main findings                                         | Present the key findings with a specific focus on theory building and testing.                                                                                                                                                                                                                                                                                    | 10-14               |
| DISCUSSION                                        |                                                       |                                                                                                                                                                                                                                                                                                                                                                   |                     |
| 15                                                | Summary of findings                                   | Summarize the main findings, taking into account the review's objective(s), research question(s), focus and intended audience(s).                                                                                                                                                                                                                                 | 14-15               |
| 16                                                | Strengths, limitations and future research directions | Discuss both the strengths of the review and its limitations. These should include (but need not be restricted to) (a) consideration of all the steps in the review process and (b) comment on the overall strength of evidence supporting the explanatory insights which emerged.<br>The limitations identified may point to areas where further work is needed. | 15-16, 17-18        |
| 17                                                | Comparison with existing literature                   | Where applicable, compare and contrast the review's findings with the existing literature (for example, other reviews) on the same topic.                                                                                                                                                                                                                         | 16-17               |
| 18                                                | Conclusion and recommendations                        | List the main implications of the findings and place these in the context of other relevant literature. If appropriate, offer recommendations for policy and practice.                                                                                                                                                                                            | 16-18               |
| 19                                                | Funding                                               | Provide details of funding source (if any) for the review, the role played by the funder (if any) and any conflicts of interests of the reviewers.                                                                                                                                                                                                                | 19-20               |

# BMJ Open

## Sustaining community-based interventions for people affected by dementia long term: The SCI-Dem realist review

|                                 |                                                                                                                                                                                                                                                                                                                             |
|---------------------------------|-----------------------------------------------------------------------------------------------------------------------------------------------------------------------------------------------------------------------------------------------------------------------------------------------------------------------------|
| Journal:                        | <i>BMJ Open</i>                                                                                                                                                                                                                                                                                                             |
| Manuscript ID                   | bmjopen-2020-047789.R2                                                                                                                                                                                                                                                                                                      |
| Article Type:                   | Original research                                                                                                                                                                                                                                                                                                           |
| Date Submitted by the Author:   | 30-Mar-2021                                                                                                                                                                                                                                                                                                                 |
| Complete List of Authors:       | Morton, Thomas; University of Worcester, Association for Dementia Studies<br>Wong, Geoff; Oxford University, Nuffield Department of Primary Care Health Sciences<br>Atkinson, Teresa; University of Worcester, Association for Dementia Studies<br>Brooker, Dawn; University of Worcester, Association for Dementia Studies |
| <b>Primary Subject Heading</b>: | Health services research                                                                                                                                                                                                                                                                                                    |
| Secondary Subject Heading:      | Geriatric medicine, Health policy, Mental health, Public health, Sociology                                                                                                                                                                                                                                                  |
| Keywords:                       | Health policy < HEALTH SERVICES ADMINISTRATION & MANAGEMENT, Organisation of health services < HEALTH SERVICES ADMINISTRATION & MANAGEMENT, Dementia < NEUROLOGY, Old age psychiatry < PSYCHIATRY, SOCIAL MEDICINE                                                                                                          |
|                                 |                                                                                                                                                                                                                                                                                                                             |

SCHOLARONE™  
Manuscripts



I, the Submitting Author has the right to grant and does grant on behalf of all authors of the Work (as defined in the below author licence), an exclusive licence and/or a non-exclusive licence for contributions from authors who are: i) UK Crown employees; ii) where BMJ has agreed a CC-BY licence shall apply, and/or iii) in accordance with the terms applicable for US Federal Government officers or employees acting as part of their official duties; on a worldwide, perpetual, irrevocable, royalty-free basis to BMJ Publishing Group Ltd ("BMJ") its licensees and where the relevant Journal is co-owned by BMJ to the co-owners of the Journal, to publish the Work in this journal and any other BMJ products and to exploit all rights, as set out in our [licence](#).

The Submitting Author accepts and understands that any supply made under these terms is made by BMJ to the Submitting Author unless you are acting as an employee on behalf of your employer or a postgraduate student of an affiliated institution which is paying any applicable article publishing charge ("APC") for Open Access articles. Where the Submitting Author wishes to make the Work available on an Open Access basis (and intends to pay the relevant APC), the terms of reuse of such Open Access shall be governed by a Creative Commons licence – details of these licences and which [Creative Commons](#) licence will apply to this Work are set out in our licence referred to above.

Other than as permitted in any relevant BMJ Author's Self Archiving Policies, I confirm this Work has not been accepted for publication elsewhere, is not being considered for publication elsewhere and does not duplicate material already published. I confirm all authors consent to publication of this Work and authorise the granting of this licence.

1  
2  
3  
4  
5  
6  
7  
8 **Sustaining community-based interventions for people affected by dementia**  
9 **long term: The SCI-Dem realist review**  
10  
11  
12  
13  
14  
15  
16

17 **Authors:**

18 **Thomas Morton**, Association for Dementia Studies, University of Worcester, Worcester, UK.

19 **Geoffrey Wong**, Nuffield Department of Primary Care Health Sciences, University of Oxford, Oxford,  
20 UK.  
21

22 **Teresa Atkinson**, Association for Dementia Studies, University of Worcester, Worcester, UK.  
23

24 **Dawn Brooker**, Association for Dementia Studies, University of Worcester, Worcester, UK.  
25  
26  
27  
28  
29  
30  
31  
32  
33

34 **Corresponding Author:**

35 **Professor Dawn Brooker**, Director of the Association for Dementia Studies, School of Allied Health  
36 and Community, University of Worcester, Henwick Grove, Worcester WR2 6AJ.  
37  
38

39 Email: *d.brooker@worc.ac.uk*. Tel: 01905 855250  
40  
41  
42  
43  
44  
45  
46  
47  
48  
49  
50  
51  
52  
53  
54  
55  
56  
57  
58  
59  
60



## Sustaining community-based interventions for people affected by dementia long term: The SCI-Dem realist review

Thomas Morton<sup>1</sup> Geoffrey Wong<sup>2</sup> Teresa Atkinson<sup>1</sup> Dawn Brooker<sup>1</sup>

### ABSTRACT

**Objectives:** Community-based support for people with earlier-stage dementia and their care partners, such as regularly-meeting groups and activities, can play an important part in post-diagnostic care. Typically delivered piecemeal in the UK, by a variety of agencies with inconsistent funding, provision is fragmented and many such interventions struggle to continue after only a short start-up period. This realist review investigates what can promote or hinder such interventions in being able to sustain long term.

**Methods:** Key sources of evidence were gathered using formal searches of electronic databases and grey literature, together with informal search methods such as citation tracking. No restrictions were made on article type or study design; only data pertaining to regularly-meeting, ongoing, community-based interventions were included. Data were extracted, assessed, organised and synthesised and a realist logic of analysis applied to trace context-mechanism-outcome configurations as part an overall programme theory. Consultation with stakeholders, involved with a variety of such interventions, informed this process throughout.

**Results:** Ability to continually get and keep members; staff and volunteers; the support of other services and organisations; and funding/income were found to be critical, with multiple mechanisms feeding into these sub-outcomes, sensitive to context. These included an emphasis on socialising and person-centredness; lowering stigma and logistical barriers; providing support and recognition for personnel; networking, raising awareness and sharing with other organisations, while avoiding conflict; and skilled financial planning and management.

**Conclusions:** This review presents a theoretical model of what is involved in the long-term sustainability of community-based interventions. Alongside the need for longer-term funding and skilled financial management, key factors include the need for stigma-free, person-centred provision, sensitive to members' diversity and social needs, as well as the need for a robust support network including the local community, health and care services. Challenges were especially acute for small-scale and rural groups.

## Article Summary

- This review brings together transferrable learning from a wide range of intervention types on a topic that has received little formal, integrated research attention, to deepen our understanding on how such interventions could be implemented and supported to sustain more universally and consistently across the sector.
- This review's realist approach is well suited to accommodate and account for the complexity of such 'real life' intervention programmes, as implemented under different conditions in different settings, to extract transferable conclusions.
- This review was designed to gather evidence regarding how interventions can be sustained, not on the efficacy/effectiveness of interventions of this type, hence conclusions regarding the latter are beyond its scope.
- Literature was limited as this research question is not commonly the main focus of study in dementia care research.
- Not all data were equal in depth and detail or the highest empirical rigour, rather they contributed together in a way that was useful to an overall programme theory that will benefit from further refinement and revision with empirical testing in subsequent research.

## Keywords

Dementia; Post-diagnosis; Peer support; Psychosocial; Implementation

## INTRODUCTION

Supporting people with dementia and their carers to live as well as possible in their communities, with timely psychosocial support, is a global public health goal,<sup>1</sup> though remains a challenging aspiration in many countries. In the UK, with an aging population<sup>2</sup> and increasing pressure on already-stretched health services<sup>3</sup> policy has for some time pointed to the need to move towards a model of social care where more people are cared for and supported at home, in the community. Improving provision of early, post-diagnosis support, support for family carers and better integrated care (involving the voluntary and independent sectors) – all in a more dementia-friendly community environment – are contemporary UK Government priorities for dementia care.<sup>4</sup>

Support following a diagnosis of dementia is patchy,<sup>4</sup> however, with families in some areas lacking any formal proactive support for those with less severe symptoms beyond occasional contact with primary care and third sector. There are significant gaps in social care for people affected by dementia across the UK.<sup>5,6,7</sup> Multiple recent reports describe a climate where the state of social care provision – mainly delivered piecemeal by private and third-sector organisations – is “precarious and dysfunctional” in many parts of the country<sup>6</sup> and in some areas has “broken down” creating “care deserts”.<sup>5</sup> There is an associated reliance on informal carers (e.g. family members) but there is a growing recognition that informal carers’ own health and wellbeing is often negatively impacted by their caring activities.<sup>6</sup> The detrimental health impact of social isolation and loneliness is also increasingly being recognised,<sup>8,9</sup> with survey data revealing nearly 60% of people living with dementia report loneliness, isolation and losing touch with people in their lives since diagnosis, around a quarter feeling they are not part of their community and that people avoid them.<sup>7</sup> Family carers can also be subject to such loneliness and isolation.<sup>10</sup> This situation has only been exacerbated by the recent impact of COVID-19,<sup>11</sup> bringing the need for groups and activities that provide social connection and support for people and families affected by dementia into stark relief.

1  
2  
3  
4  
5  
6  
7  
8  
9  
10  
11  
12  
13  
14  
15  
16  
17  
18  
19  
20  
21  
22  
23  
24  
25  
26  
27  
28  
29  
30  
31  
32  
33  
34  
35  
36  
37  
38  
39  
40  
41  
42  
43  
44  
45  
46  
47  
48  
49  
50  
51  
52  
53  
54  
55  
56  
57  
58  
59  
60

There have been various attempts to mitigate these challenges in communities across the country, in the form of groups and activities for people with dementia and family carers. These aim to serve a number of functions: peer support, companionship and help for people to reintegrate with their communities; delivery of professional support, psychosocial interventions and physical exercise; a point of contact, signposting and referral for other services; or raising awareness and acting as a dementia-friendly community hub. The benefits of such community-based initiatives are now being recognised.<sup>12 13 14 15 16</sup> There is evidence that regular social activity, where people are able to leave their homes and gather together in a communal setting on a frequent and ongoing basis, can be helpful both for people living with dementia and the people who care for them.<sup>12 13 17 18 19</sup> With care systems unprepared for the forecasted UK doubling of the number of people living with dementia (1.6 million) and tripling of social care costs by 2040,<sup>20</sup> improving provision of evidence-based community initiatives for people with dementia, and their families, is imperative.<sup>12 13 14 15 16 21 22</sup> However, even prior to the 2020 pandemic restrictions, such initiatives, groups and activities already faced a variety of challenges with long-term sustainability. These challenges and how to meet them are much talked about in the dementia care policy, rhetoric and practice arenas but have received very little research attention.

This realist review aims to deepen our understanding of what can help or hinder the long-term sustainability of regularly meeting, place-based community interventions, such as groups and activities, for people affected by dementia. It aims to use data gathered as the basis of evidence-informed recommendations for policy and practice.

## METHODS

This review was conducted from December 2018 to December 2020. A project protocol was registered with PROSPERO in March 2019<sup>23</sup> and the protocol was published in this journal in June 2019.<sup>24</sup>

1  
2  
3 The realist review is an interpretive, theory-driven approach to synthesising evidence from a  
4 range of sources, including qualitative, quantitative and mixed-methods research.<sup>25</sup> This approach is  
5 designed to accommodate and account for the complexity of 'real life' intervention programmes, as  
6 implemented under different conditions in different settings, aiming to explain how and why context  
7 can influence outcomes.<sup>26</sup> Hence it is well suited to extracting transferable lessons from reviewing  
8 the functioning and success (or otherwise) of a range of community-based interventions for people  
9 affected by dementia, as these are likely to involve a high level of complexity and be responsive to  
10 contextual factors which are likely to vary considerably from intervention to intervention. Data was  
11 gathered and synthesized, with a realist logic of analysis applied to identify causal chains involving  
12 different contexts, mechanisms and outcomes that can in turn affect an initiative's long-term  
13 sustainability. We define context as the conditions that trigger or modify the behaviour of  
14 mechanisms;<sup>27</sup> mechanisms are the usually-hidden processes that generate outcomes, defined as  
15 "underlying entities, processes, or structures which operate in particular contexts to generate  
16 outcomes of interest."<sup>28</sup> outcomes can be "either intended or unintended and can be proximal,  
17 intermediate, or final"<sup>27</sup> and in this review refer to any identifiable result (of the interaction between  
18 contexts and mechanisms) that can directly have a bearing on an intervention's ability to sustain  
19 long term.

20  
21  
22  
23  
24  
25  
26  
27  
28  
29  
30  
31  
32  
33  
34  
35  
36  
37  
38  
39  
40  
41  
42 Our review followed Pawson's five iterative stages<sup>29</sup> as outlined below.

#### 43 44 45 *Step 1: Locating existing theories*

46  
47 This initial step was to identify and gather existing ideas around what can help or hinder the  
48 sustainability of a group or activity, from those who have first-hand experience of them. In line with  
49 realist review guidelines (RAMESES),<sup>30</sup> stakeholders were contacted by TA and TM and consulted for  
50 input at points throughout the project. These stakeholders were lay experts involved with  
51 community-based interventions in various capacities, whether commissioning, leading, running,  
52 supporting or attending. In the first instance a workshop was held in March 2019 with a group of 13  
53  
54  
55  
56  
57  
58  
59  
60

1  
2  
3 invited stakeholders to gather their content expertise on barriers and facilitators to engagement and  
4 sustainability. Eight others were subsequently consulted by TM individually, in person, by telephone  
5 or by email. Input was also taken by TA and TM from members and facilitators of various local DEEP  
6 (Dementia Engagement and Empowerment Project)<sup>31</sup> groups at a national meeting in June 2019, and  
7 TM also visited three community groups in Herefordshire, Oxfordshire and Wolverhampton. In  
8 addition, an exploratory search of the literature was conducted by TM, using informal methods such  
9 as citation tracking and snow-balling<sup>32</sup> along with informal scoping searches<sup>33</sup> and the gathering of  
10 relevant publications and materials recommended by stakeholders. Together, this contributed  
11 towards the building of an initial theoretical model, or *programme theory*, with the guidance of GW,  
12 prior to our main search, both to inform our formal search strategy and to be tested and refined by  
13 the data subsequently found. This model began as two diagrams (one regarding engagement, one  
14 regarding sustainability), drawn up by TM and TA by batching issues raised at the March workshop,  
15 and possible links between them. These diagrams were then discussed, altered and added to  
16 iteratively over four months as new stakeholder input became available (these can be seen in  
17 Supplementary file 1). These diagrams were speculative so kept deliberately broad and fluid in focus,  
18 as a work in progress. Detailed analysis of possible context-mechanism-outcome configurations  
19 (CMOCs) was not considered appropriate at this stage, as: 1) Not enough data had been gathered; 2)  
20 This would be both labour intensive and too limiting for a model whose purpose was only as a  
21 steering guide to inform the review proper, yet to be undertaken.

## 22 *Step 2: Search for evidence*

### 23 **Formal search**

24 Formal searching activity took place between May and September 2019. A search strategy was  
25 designed, piloted and conducted by the research team with the guidance from an information  
26 specialist (CK) (see Supplementary file 2). The following databases were searched: Academic Search  
27 Complete; AMED; CINAHL; EMBASE; MEDLINE; ProQuest; PsycINFO; PubMed; Scopus and Social Care  
28

1  
2  
3 Online. In keeping with RAMESES guidelines,<sup>30</sup> no restrictions were made on the type of article or  
4  
5 study design eligible for inclusion, other than being more recent than 1990. Documents such as  
6  
7 editorials, opinion pieces, information guides, publicity materials, newspaper and magazine articles,  
8  
9 evaluation reports, PhD theses and research poster and slide presentations were included along with  
10  
11 peer-reviewed journal articles, if found to be holding relevant information. Search terms were kept  
12  
13 uniform across all databases and searching was carried out by looking for the occurrence of these  
14  
15 within the title, abstract and key words of documents (or nearest equivalent) in each database.  
16  
17 Database-specific defined keywords were not used as the types of intervention were not only very  
18  
19 diverse but often without a common agreed terminology, hence using too narrowly-specified terms  
20  
21 would have resulted in an unmanageably voluminous list of possible key words, without necessarily  
22  
23 locating better-targeted results, and could be limiting and misleading. In addition the nature of this  
24  
25 review's research question is atypical in that it does not have an efficacy/effectiveness focus in  
26  
27 common with many of its sources of data, hence manual screening was key in determining  
28  
29 relevance. A disadvantage of this was that we had to accept a higher ratio of irrelevant search hits  
30  
31 which then had to be excluded through manual screening of title and abstract.  
32  
33  
34  
35  
36

37  
38 After removing duplicates, records were screened by title and abstract by TM using the  
39  
40 eligibility criteria, ensuring interventions covered were those targeted towards people with  
41  
42 dementia and their families living in the community, that brought people together physically and  
43  
44 met on a frequent, regular and an on-going basis (these criteria are outlined in full detail in  
45  
46 Supplementary file 3). Interventions exclusively for those with severe dementia at advanced stages  
47  
48 were excluded as these were not the focus of this review. Those with severe dementia have high  
49  
50 needs and are less likely to be living independently in the community, hence by their nature  
51  
52 community-based interventions where people meet outside of their home are likely to serve those  
53  
54 who are towards the start of their dementia journey rather than those at an advanced stage, and are  
55  
56 distinct from more acute care.  
57  
58  
59  
60



1  
2  
3 Full text of documents were then obtained of the remaining records, and again screened by  
4  
5 close reading against the eligibility criteria by TM. A 10% random subsample of was reviewed  
6  
7 independently at each of these stages by a second reviewer (TA) with disagreements recorded and  
8  
9 resolved by discussion. Informal searching continued iteratively alongside the formal search and in  
10  
11 response to articles found in it, congruent with the realist review process which allows searching to  
12  
13 be revised as necessary as the review progresses.<sup>30</sup> In certain cases, documents regarding on  
14  
15 interventions that met only some, not all, of the inclusion criteria were included, if found to contain  
16  
17 information on hypothesised mechanisms with reason to believe such mechanisms may function  
18  
19 similarly or analogously in types of intervention that are closely related.<sup>29</sup>  
20  
21  
22

#### 23 24 *Steps 3 and 4: Article selection, data extraction and organisation*

25  
26  
27 Figure 1 shows a PRISMA diagram outlining the full screening and selection process.  
28  
29

30 **[Figure 1 here]**  
31

32  
33 Following screening and close-reading of full texts for eligibility, full texts of the remaining  
34  
35 122 articles were loaded into NVivo qualitative data analysis software to help locate and categorise  
36  
37 (code) relevant sections of text containing data regarding contexts, mechanisms or outcomes  
38  
39 pertinent to the long-term sustainability of the intervention they described. Coding was both  
40  
41 inductive (codes created in response to data as found) and deductive (codes created in advance,  
42  
43 informed by the initial programme theory) and carried out by TM (An overview of top-level 'parent'  
44  
45 codes can also be seen in Supplementary file 1; deductive codes can be identified in that they mirror  
46  
47 the headings of the initial model diagrams). The characteristics of the articles were also extracted  
48  
49 separately into an EXCEL spreadsheet.  
50  
51

52  
53 During this extraction and organisation process, more fine-grained assessments of relevance  
54  
55 (to answering the research question) and rigour (the trustworthiness and credibility of the data and  
56  
57 its source)<sup>25 34</sup> were made by TM, with a random sample of 10% of articles again selected, assessed  
58  
59  
60

1  
2  
3 independently and discussed with TA. The data contained in an article was assessed on its own  
4 merits, not on the merits of the paper or study as a whole. This is because it was recognised that  
5 poorly designed or conducted research may still contain good quality 'nuggets' of information for a  
6 realist review,<sup>34 35</sup> or a document meeting inclusion criteria may not contain any relevant data. Due  
7 to the variety and breadth of the type of article included in the review, a standardised relevance and  
8 rigour assessment tool that would be appropriate in all cases was impossible to design.<sup>25</sup> Rather a  
9 set of general principles was agreed to guide a 'traffic light' assessment system of low, medium and  
10 high relevance, and low, medium and high rigour (see Supplementary file 3 for detail). Reasons for  
11 each assessment were outlined and logged for each article and compared with each other to ensure  
12 consistency. Ambiguous cases of relevance or rigour were discussed with the wider project team as  
13 they arose. A decision was made by the project team to exclude articles assessed to have data of low  
14 relevance or low rigour to ensure a more robust dataset with which to build the final programme  
15 theory and context-mechanism-outcome configurations.

#### 32 *Step 5: Synthesising the evidence and drawing conclusions*

33  
34  
35  
36 Once data from the remaining articles were extracted and categorised, key outcome themes were  
37 identified by discussion with the whole team. These themes and categories were presented to the  
38 stakeholders for comment and feedback, to determine what was most important to focus upon, if  
39 they felt anything had been overlooked and if any changes or refinements should be made. Four key  
40 outcome areas (getting and keeping members, personnel, support of other organisations and  
41 funding/income) were settled upon. Data were then organised under these headings in the form of  
42 "If-then" statements that provided initial explanations of how, why, for whom and in which contexts  
43 these outcomes might arise, initially by TM but with input from DB and TA. These were then further  
44 refined, with guidance from GW, using a realist logic of analysis to identify cause-and-effect chains in  
45 the data and finally elaborated into context-mechanism-outcome configurations (CMOCs).<sup>30</sup> Related  
46 CMOCs were then grouped together to create recommendations for practice or policy that also

1  
2  
3 acted as a summary of the CMOCs found. Diagrams of the factors found affecting sustainability, and  
4  
5 how they are likely to relate to each other within an overall programme theory, were also designed  
6  
7 through team discussion and drawn by TM.  
8  
9

### 10 **Patient and public involvement**

11  
12  
13 The research question was developed during the authors' previous work with community  
14  
15 interventions (for example, but not limited to, Meeting Centres)<sup>12 13</sup> and the practical problems  
16  
17 encountered with sustaining such interventions expressed both by personnel and by members of the  
18  
19 public attending. This review mainly involved the gathering of secondary data so did not involve  
20  
21 patients or public directly as study participants. However, people with dementia, their family and  
22  
23 friends, intervention staff and volunteers, and other community stakeholders were consulted as  
24  
25 content experts throughout, informing the search strategy, data synthesis, development of materials  
26  
27 and channels for dissemination. More information on our stakeholder consultation process can be  
28  
29 found under *Step 1: Locating existing theories* and *Step 5: Synthesising the evidence and drawing*  
30  
31 *conclusions*.  
32  
33  
34  
35  
36  
37  
38  
39

### 40 **RESULTS**

41  
42 In total, 61 articles were coded to develop the CMOCs used to refine and expand our initial  
43  
44 programme theory (see Supplementary file 4 for a detailed list of included articles). They were  
45  
46 published between 1990 and 2020, and ranged in type: most were either peer-reviewed journal  
47  
48 articles (28) or formal reports/evaluations (18); information guides (8), news feature articles (3),  
49  
50 doctoral theses (2) and conference presentation paraphernalia (2) were also analysed. About half of  
51  
52 these articles (33) were authored (or co-authored) in the UK, consistent with a proportion being  
53  
54 identified informally through UK-based stakeholders (see Figure 2). Four articles had international  
55  
56 authorship. Other countries of origin (or co-origin) comprised the US (8), Netherlands (7), Germany  
57  
58  
59  
60

1  
2  
3 (5), Canada (4), Italy (4), Norway (3), Poland (3), Australia (2), Ireland (2), Sweden (2), Chile (1), Japan  
4  
5 (1), Portugal (1) and Thailand (1). The type of intervention discussed in these articles varied broadly,  
6  
7 including: day centres/day care, social activities, sports and exercise initiatives, peer support groups,  
8  
9 arts and crafts groups, singing and music groups, cognitive stimulation, gardening activities and  
10  
11 other outdoor activities. Many interventions had multiple and overlapping elements: for example, a  
12  
13 sports activity may have a social function, a drop-in day centre may have exercise and cognitive  
14  
15 stimulation activities, or a craft club may have peer support built in. When an article's remit was  
16  
17 general (for example community support services, outdoor activities, social and leisure activities or  
18  
19 third sector groups), data was included from the article only if it was relevant to our programme  
20  
21 theory and the kind of interventions outlined in the inclusion criteria (see Supplementary file 3).  
22  
23  
24  
25

26  
27 Our analysis, together with stakeholder input, identified four critical areas affecting the  
28  
29 sustainability of an intervention: members, staff and volunteers, support of other organisations and  
30  
31 funding/income. These were each sub-divided into "getting" and "keeping" outcomes in recognition  
32  
33 of changes in focus over time regarding these areas, and likely different contexts and mechanisms  
34  
35 involved as an intervention continues. Figure 2 shows an overview of factors leading to the getting  
36  
37 and keeping of members, staff and volunteers, support of other organisations and funding/income,  
38  
39 found in the article data (individual diagrams tracing factors for each critical area can be found in  
40  
41 Supplementary file 5).  
42  
43  
44

45 **[Figure 2 here]**  
46  
47

48  
49 Our analysis of the data produced 201 CMOCs (outlined in full in Supplementary file 6), all  
50  
51 covered by the above eight sub-divisions. These CMOCs provide causal explanations relating to  
52  
53 sustainability of community-based groups and activities either at the level of the individual,  
54  
55 organisation or wider. Due to the high number of CMOCs, they were further organised by grouping  
56  
57 them under practical recommendations that could follow. These recommendations are not simply  
58  
59 an end conclusion, but were also part of the data synthesizing process, as they act as a way in which  
60

to categorise and summarise the large number of CMOCs. Examples of how several grouped CMOCs were related to a recommendation can be seen in Table 1.

| Recommendation                                                                                                                                               | CMOCs                                                                                                                                                                                                                                                                                                                                                                                                                                                                                                                                                                                                                                                                                                                                                                                                                                                                                                                                                                                                                                                                                                                                                                                                                                                                                                                                                                                                                                                                                                                                                                                                                                                                                                                                                                                                                                                                                                                                                                                                                                    |
|--------------------------------------------------------------------------------------------------------------------------------------------------------------|------------------------------------------------------------------------------------------------------------------------------------------------------------------------------------------------------------------------------------------------------------------------------------------------------------------------------------------------------------------------------------------------------------------------------------------------------------------------------------------------------------------------------------------------------------------------------------------------------------------------------------------------------------------------------------------------------------------------------------------------------------------------------------------------------------------------------------------------------------------------------------------------------------------------------------------------------------------------------------------------------------------------------------------------------------------------------------------------------------------------------------------------------------------------------------------------------------------------------------------------------------------------------------------------------------------------------------------------------------------------------------------------------------------------------------------------------------------------------------------------------------------------------------------------------------------------------------------------------------------------------------------------------------------------------------------------------------------------------------------------------------------------------------------------------------------------------------------------------------------------------------------------------------------------------------------------------------------------------------------------------------------------------------------|
| <p>Getting Members:</p> <p><b>Ensure a warm, welcoming, non-stigmatising introduction, with strong staff interpersonal skills and an appealing venue</b></p> | <p>CMOC 3: If facilitators are knowledgeable and empathetic, with good interpersonal skills (C), an initiative will be perceived as more welcoming and inclusive (O), as they will be better at understanding needs, engaging and building trust with potential members and their families (M).<sup>36 37 38 39 40 41</sup></p> <p>CMOC 4: If an initiative has an informal, unrushed and warm welcome on first visit (C), then people are more likely to want to return (O), as they are more likely to find the experience relaxing and enjoyable, not uncomfortable and intimidating (M).<sup>40 42 43 44 45</sup></p> <p>CMOC 5: If potential members have had poor previous experiences with groups or activities (dementia related or not) (C), they may not want to try another group or activity (O), because they think the experience will be similar and will want to avoid it (M).<sup>37 41 46 47</sup></p> <p>CMOC 6: If time is taken for personal contact, home visits or taster sessions with potential members (C), then people are more likely to come (O), as they will feel more familiar with the initiative and more trusting of those running it (M).<sup>36 38 47 48 49 50</sup></p> <p>CMOC 7: If an initiative is familiar and trusted, or local and well-integrated with other organisations in the community (C), then people are more likely to come (O), as its links to familiar things that they trust will make it less intimidating (M).<sup>37 41 42 48 51 52 53 54 55 56</sup></p> <p>CMOC 8: If an intervention is based in familiar surroundings in, and open to, the community (C), then people are more likely to come (O), because potential members will find the normalcy, lack of stigma and chance for social integration appealing (M).<sup>38 41 48 52 57 58 59 60 61 62</sup></p> <p>CMOC 9: If a venue is dementia-friendly, comfortable and accessible (C), people are more likely to come (O), as they will not have concerns about comfort or access (M).<sup>48 55 63 64</sup></p> |
| <p>Keeping Members:</p> <p><b>Keep activities relaxed, loose and focussed on the social, and encourage friendships and peer support</b></p>                  | <p>CMOC 47: If there is group cohesion and mutual trust between members (C), then a group is more likely to sustain (O), because members will feel more solidarity and investment in the group (M).<sup>65</sup></p> <p>CMOC 48: If friendships between members are encouraged, recognised and supported by staff and activities (C), then people are likely to keep coming (O), as they will feel more supported, comfortable and engaged, and able to support each other (M).<sup>43 54 66 67 68</sup></p> <p>CMOC 49: If an intervention is too focussed on agendas, rules and expectations (C), then people may stop coming (O), because they feel pressured, restricted and unable to relax and enjoy the social and emotional benefits important to them (M).<sup>44 45 63 67 69 70 71</sup></p> <p>CMOC 50: If the pace of activity through the day/session is too fast and strict (C), then people may stop coming (O), because they will struggle to stay engaged and will not enjoy themselves (M).<sup>43 48 57 61 72</sup></p> <p>CMOC 51: If ample informal time is made for socialising, peer support and feedback (C), then members are more likely to keep coming (O), as they will be more likely to feel comfortable and supported (M).<sup>40 43 48 50 58 62 65 67 69 70 71 72 73 74 75</sup></p> <p>CMOC 52: If there is opportunity to have communal eating and relaxing in a "cozy" environment (C), then members are more likely to keep coming (O), as this will provide comfort and foster group cohesion (M).<sup>40 65</sup></p>                                                                                                                                                                                                                                                                                                                                                                                                                                                                              |

**Table 1** Examples of CMOCs leading to recommendations**Recommendations for practice**

In total, 41 recommendations for practice were drawn from the CMOCs as can be seen in Table2.

| Getting Members                                                                                                                                                                                                                                                                                                                                                                                                                                                                                                                                                                                                                                                                                                                                                                                                                                                                                                                                                                                                                                                                                                                                                                                                                                                                                                                                                                                                                                                                                                                                                                                                                                                                                                                                                                                                                                                                                                                                                                                                                                                              | Keeping Members                                                                                                                                                                                                                                                                                                                                                                                                                                                                                                                                                                                                                                                                                                                                                                                                                                                                                                                                                                                                                                                                                                                                                                                                                                                                                                                                                                                                                                                                                                   |
|------------------------------------------------------------------------------------------------------------------------------------------------------------------------------------------------------------------------------------------------------------------------------------------------------------------------------------------------------------------------------------------------------------------------------------------------------------------------------------------------------------------------------------------------------------------------------------------------------------------------------------------------------------------------------------------------------------------------------------------------------------------------------------------------------------------------------------------------------------------------------------------------------------------------------------------------------------------------------------------------------------------------------------------------------------------------------------------------------------------------------------------------------------------------------------------------------------------------------------------------------------------------------------------------------------------------------------------------------------------------------------------------------------------------------------------------------------------------------------------------------------------------------------------------------------------------------------------------------------------------------------------------------------------------------------------------------------------------------------------------------------------------------------------------------------------------------------------------------------------------------------------------------------------------------------------------------------------------------------------------------------------------------------------------------------------------------|-------------------------------------------------------------------------------------------------------------------------------------------------------------------------------------------------------------------------------------------------------------------------------------------------------------------------------------------------------------------------------------------------------------------------------------------------------------------------------------------------------------------------------------------------------------------------------------------------------------------------------------------------------------------------------------------------------------------------------------------------------------------------------------------------------------------------------------------------------------------------------------------------------------------------------------------------------------------------------------------------------------------------------------------------------------------------------------------------------------------------------------------------------------------------------------------------------------------------------------------------------------------------------------------------------------------------------------------------------------------------------------------------------------------------------------------------------------------------------------------------------------------|
| <p><b>Emphasise the social aspects of your intervention, including food and refreshments, for wide appeal</b></p> <p>CMOC 1 – CMOC 2 <sup>40 48 50 57 58 59 62 64 75</sup></p> <p><b>Ensure a warm, welcoming, non-stigmatising introduction, with strong staff interpersonal skills and an appealing venue</b></p> <p>CMOC 3 – CMOC 9 <sup>36 37 38 39 40 41 42 43 44 45 46 47 48 49 50 51 52 53 54 55 56 57 58 59 60 61 62 63 64</sup></p> <p><b>Foster understanding and support from trusted friends, family and health professionals, as their encouragement can be key</b></p> <p>CMOC 10 – CMOC 14 <sup>36 38 41 42 47 48 54 56 58 62 65 73 75 76 77 78 79</sup></p> <p><b>Provide meaningful activities that have resonance with people's interests and experience, personal history and culture</b></p> <p>CMOC 15 – CMOC 20 <sup>41 44 45 47 48 50 53 56 57 58 62 63 64 65 67 69 70 71 72 77 80 81 82 83 84</sup></p> <p><b>Be sensitive to differences in abilities, ages and stages and aim to empower members rather than avoid challenges for them</b></p> <p>CMOC 21 – CMOC 24 <sup>37 43 48 58 60 62 63 64 69 73 79</sup></p> <p><b>Offer information and advice to connect with a broad range of people who may be in need</b></p> <p>CMOC 25 <sup>42 44 45 54 73 85</sup></p> <p><b>Ensure people can get there easily, safely, reliably and cheaply</b></p> <p>CMOC 26 – CMOC 30 <sup>36 37 38 44 45 47 48 49 53 56 59 60 61 64 65 73 76 78 82 85 86</sup></p> <p><b>Stay in constant contact with potential referrers and keep them involved</b></p> <p>CMOC 31 – CMOC 32 <sup>41 46 51 54 55 61 74 75 79</sup></p> <p><b>Your "public relations" strategy should focus on who the intervention is for and what people can expect, and use existing networks to spread your message</b></p> <p>CMOC 33 – CMOC 41 <sup>36 37 38 41 44 45 46 47 48 49 51 54 56 59 61 62 66 67 70 72 73 74 75 78 80 82 83 84 87 88 89</sup></p> <p><b>Consider simple and easy self referral</b></p> <p>CMOC43 – CMOC 46 <sup>38 44 45 47 57 61 74 76 79 80 83 88</sup></p> | <p><b>Keep activities relaxed, loose and focussed on the social, and encourage friendships and peer support</b></p> <p>CMOC 47 – CMOC 52 <sup>40 43 44 45 48 50 54 57 58 61 62 63 65 66 67 68 69 70 71 72 73 74 75</sup></p> <p><b>Encourage normalised activities and social integration outside of the group to empower members and reduce stigma</b></p> <p>CMOC 53 – CMOC 57 <sup>37 38 41 46 47 48 49 52 54 57 58 59 61 62 66 67 71 76 90</sup></p> <p><b>Be person-centred: Give members input into planning and decision-making, and respect their individual needs and autonomy</b></p> <p>CMOC 58 – CMOC 63 <sup>36 40 41 42 43 44 45 46 48 52 55 59 61 63 65 66 67 71 74 84 91</sup></p> <p><b>Talk to family or care partners about what arrangements and support they need in place</b></p> <p>CMOC 64 – CMOC 65 <sup>38 44 45 47 48 49 50 54 57 60 61 73 78</sup></p> <p><b>Be sensitive to differences in abilities, ages and stages and have strategies to differentiate and manage activities so needs don't clash</b></p> <p>CMOC 66 – CMOC 70 <sup>37 41 43 44 45 46 47 48 49 57 58 59 60 61 66 67 71 74 75 76 78</sup></p> <p><b>Ensure your venue is comfortable, stable and familiar, with adequate facilities and multiple spaces for use</b></p> <p>CMOC 71 – CMOC 72 <sup>43 48 55 63 89</sup></p> <p><b>Stability and reliability matters to members, so aim for structure and minimise disruption</b></p> <p>CMOC 73 – CMOC 77 <sup>36 37 38 40 43 47 48 61 65 66 67 72 73 75</sup></p> |
| Getting Staff and Volunteers                                                                                                                                                                                                                                                                                                                                                                                                                                                                                                                                                                                                                                                                                                                                                                                                                                                                                                                                                                                                                                                                                                                                                                                                                                                                                                                                                                                                                                                                                                                                                                                                                                                                                                                                                                                                                                                                                                                                                                                                                                                 | Keeping Staff and Volunteers                                                                                                                                                                                                                                                                                                                                                                                                                                                                                                                                                                                                                                                                                                                                                                                                                                                                                                                                                                                                                                                                                                                                                                                                                                                                                                                                                                                                                                                                                      |
| <p><b>Network proactively: Engage in outreach activities to boost visibility and awareness; approach other groups and organisations for help</b></p> <p>CMOC 78 – CMOC 83 <sup>46 48 50 56 58 59 61 67 69 77 80 83 84 89 91</sup></p> <p><b>Get to know potential stakeholder groups in the local population that may provide a reliable volunteer base, and consider how to reach out to them</b></p> <p>CMOC 84 – CMOC 90 <sup>53 56 62 65 81 83 91 92 93</sup></p> <p><b>Not all personnel need expertise, but ensure facilitators have good interpersonal and leadership skills, and your volunteer workforce is reliable</b></p>                                                                                                                                                                                                                                                                                                                                                                                                                                                                                                                                                                                                                                                                                                                                                                                                                                                                                                                                                                                                                                                                                                                                                                                                                                                                                                                                                                                                                                        | <p><b>Foster flexibility, collaboration and communication skills in personnel to create a healthy and effective working environment</b></p> <p>CMOC 96 – CMOC 97 <sup>59 60 76 79 93</sup></p> <p><b>Plan strategies to maintain the satisfaction and enjoyment of staff and volunteers, and to avoid burnout</b></p> <p>CMOC 98 – CMOC 104 <sup>38 43 52 58 61 70 74 75 84</sup></p> <p><b>If possible, have financial support in place for staff roles and volunteers activities, so they will feel secure and valued</b></p> <p>CMOC 105 – CMOC 108 <sup>51 67 73 79 87 84</sup></p>                                                                                                                                                                                                                                                                                                                                                                                                                                                                                                                                                                                                                                                                                                                                                                                                                                                                                                                           |

|                                                                                                                                                                                                                                                                                                                                                                                                                                                                                                                                                                                                                                                                                                                                                                                                                                                                                                                                                                                                                                                                               |                                                                                                                                                                                                                                                                                                                                                                                                                                                                                                                                                                                                                                                                                                                                                                                                                                                                                                                                                              |
|-------------------------------------------------------------------------------------------------------------------------------------------------------------------------------------------------------------------------------------------------------------------------------------------------------------------------------------------------------------------------------------------------------------------------------------------------------------------------------------------------------------------------------------------------------------------------------------------------------------------------------------------------------------------------------------------------------------------------------------------------------------------------------------------------------------------------------------------------------------------------------------------------------------------------------------------------------------------------------------------------------------------------------------------------------------------------------|--------------------------------------------------------------------------------------------------------------------------------------------------------------------------------------------------------------------------------------------------------------------------------------------------------------------------------------------------------------------------------------------------------------------------------------------------------------------------------------------------------------------------------------------------------------------------------------------------------------------------------------------------------------------------------------------------------------------------------------------------------------------------------------------------------------------------------------------------------------------------------------------------------------------------------------------------------------|
| CMOC 91 – CMOC 95 <sup>38 50 51 58 61 71 72 73 75 79</sup>                                                                                                                                                                                                                                                                                                                                                                                                                                                                                                                                                                                                                                                                                                                                                                                                                                                                                                                                                                                                                    |                                                                                                                                                                                                                                                                                                                                                                                                                                                                                                                                                                                                                                                                                                                                                                                                                                                                                                                                                              |
| <b>Getting Support of Other Organisations</b>                                                                                                                                                                                                                                                                                                                                                                                                                                                                                                                                                                                                                                                                                                                                                                                                                                                                                                                                                                                                                                 | <b>Keeping Support of Other Organisations</b>                                                                                                                                                                                                                                                                                                                                                                                                                                                                                                                                                                                                                                                                                                                                                                                                                                                                                                                |
| <p><b>Focus on raising awareness and communicating value both to professionals and the community, involving them where possible</b></p> <p>CMOC 110 – CMOC 114<sup>37 39 41 42 50 54 55 61 70 75 79 80 84 86 90</sup></p> <p><b>Approach and ask other community organisations if they can help with venue, resources, training, volunteers or contacts</b></p> <p>CMOC 115 – CMOC 118<sup>46 48 52 58 62 65 67 69 71 72 75 77 80 92 93</sup></p> <p><b>Use your physical location (venue or neighbourhood) as an opportunity to build links with others sharing that space</b></p> <p>CMOC 119 – CMOC 121<sup>41 42 48 58 59 62 79</sup></p> <p><b>Seek out like-minded groups to band together with and share knowledge, resources, contacts and strategy</b></p> <p>CMOC 122 – CMOC 124<sup>42 67 77</sup></p> <p><b>To avoid conflict with other organisations, minimise overlap, involve them or offer them something of benefit</b></p> <p>CMOC 125 – CMOC 131<sup>41 42 46 51 60 61 67 70 72 79 84 86 88</sup></p>                                                     | <p><b>Maintain constant contact and information sharing with the organisations, services and referrers you work with, with a dedicated person responsible if possible</b></p> <p>CMOC 138 – CMOC 142<sup>39 41 44 45 50 51 55 67 77 79 84</sup></p> <p><b>Seek authoritative external advice on overcoming differences in culture with other organisations, and up-skilling staff for collaboration</b></p> <p>CMOC 143 – CMOC 148<sup>41 51 59 60 70 76 77 79 86</sup></p> <p><b>Take time to formally plan how collaboration will work, involving collaborators in that planning</b></p> <p>CMOC 149 – CMOC 152<sup>41 44 45 51 61 70</sup></p>                                                                                                                                                                                                                                                                                                            |
| <b>Getting Funding and Income</b>                                                                                                                                                                                                                                                                                                                                                                                                                                                                                                                                                                                                                                                                                                                                                                                                                                                                                                                                                                                                                                             | <b>Keeping Funding and Income</b>                                                                                                                                                                                                                                                                                                                                                                                                                                                                                                                                                                                                                                                                                                                                                                                                                                                                                                                            |
| <p><b>Ensure communication is clear about what the intervention does and its value</b></p> <p>CMOC 153 – CMOC 163<sup>39 41 46 51 56 61 70 75 79 80 89 94</sup></p> <p><b>Build “social capital” and forge partnerships with other community organisations to help with costs and boost the case for viability and value for money</b></p> <p>CMOC 164 – CMOC 169<sup>56 60 61 70 75 76 78 79 80 87 93 94 95</sup></p> <p><b>Learn how to effectively plan and network to find funding, through knowledge-sharing with like-minded groups and seeking external advice</b></p> <p>CMOC 170 – CMOC 175<sup>37 46 55 60 61 80 86 91 94</sup></p> <p><b>Initiatives in rural areas should make clear the particular challenges that they face when seeking funding</b></p> <p>CMOC 176 – CMOC 179<sup>50 84 91</sup></p> <p><b>Find out what the national priorities are for dementia, and see if you can tailor your activities to fit; if not, lobby to change the national agenda</b></p> <p>CMOC 180 – CMOC 184<sup>39 41 42 50 51 55 59 76 77 80 84 86 87 91 95 96</sup></p> | <p><b>Keep in touch with previous, current and potential funders on an ongoing basis, as this will help when applying in the future</b></p> <p>CMOC 185 – CMOC 188<sup>46 55 61 70 94</sup></p> <p><b>Pay attention to how money can be put to use most efficiently and effectively for the benefit of all by co-operating and sharing with other organisations</b></p> <p>CMOC 189 – CMOC 190<sup>70 75 76 78 80 93</sup></p> <p><b>Plan a long-term strategy to build a portfolio of multiple income streams, that are flexible in what they contribute to paying for</b></p> <p>CMOC 191 – CMOC 194<sup>44 45 70 80 84 94</sup></p> <p><b>Ensure someone has the time and expertise to continually seek and apply for funding</b></p> <p>CMOC 195 – CMOC 197<sup>70 80 84</sup></p> <p><b>Emphasise deep learning and experience as an asset when calling for longer term funding</b></p> <p>CMOC 198 – CMOC 201<sup>39 50 51 76 77 79 87 86 96</sup></p> |

**Table 2** Recommendations for practice (For a full list of CMOCs see Supplementary file 6)

Data regarding getting and keeping members was the most abundant and showed most consensus. As may be expected, boosting the motivation and understanding of potential referrers, while lowering bureaucratic and logistical barriers, was important to getting members (CMOC 10-CMOC 14; CMOC 31-CMOC 46; CMOC 64-CMOC 65). Transport from home to venue was particularly key: not just its availability, but people’s experiences of the accessibility, appropriateness and



1  
2  
3 convenience of it (CMOC 10-CMOC 14). Other salient mechanisms involved how respected, valued  
4 and comfortable members felt, or perceived they would feel should they attend: both for  
5  
6  
7 overcoming initial anxiety and stigma and fostering a happy, cohesive group (CMOC 3-CMOC 9;  
8  
9  
10 CMOC 15-CMOC 24; CMOC 53-CMOC 63; CMOC 71-CMOC 72). Staff attitudes and a comfortable,  
11  
12 accessible venue play a role in this, but also planned practices, such as involving members in decision  
13  
14 making (CMOC 58-CMOC 63), differentiating activities for need and ability (CMOC 21- CMOC 24;  
15  
16  
17 CMOC 66-CMOC 70) and ensuring enough opportunity and time for socialising (reported to be of  
18  
19 high importance to people no matter what the intervention or activity) (CMOC 1-CMOC 2; CMOC 47-  
20  
21 CMOC 52). The stability and reliability of an intervention was also important, though often at odds  
22  
23 with nature of groups run informally with few personnel and unstable income (CMOC 73-CMOC 77).  
24  
25 Overall, ensuring individual wants and needs are met – that people they feel they are gaining  
26  
27 something useful and appropriate to them in particular – was important to keeping members long  
28  
29 term (CMOC 47-CMOC 72).  
30  
31

32  
33 Data regarding getting and keeping staff and volunteers was least abundant of the four  
34  
35 critical outcome areas, though working with other organisations was frequently alluded to as helpful  
36  
37 in finding personnel (CMOC 78-CMOC 83). Data regarding skills of personnel was largely around the  
38  
39 role of communication and collaboration in creating an encouraging and effective environment for  
40  
41 staff and volunteers (CMOC 84-CMOC 97). Context was key with regards to the availability of  
42  
43 potential volunteers in the local population, as this could be very different depending on location  
44  
45 (e.g. rural or urban), with different likely mechanisms requiring different approaches to finding and  
46  
47 encouraging volunteers from different demographic groups (CMOC 84-CMOC 90). With regard to  
48  
49 keeping volunteers, issues raised included the importance of maintaining work satisfaction and  
50  
51 avoiding burnout, and having financial support available (CMOC 98-CMOC 108).  
52  
53  
54  
55

56 Getting and keeping support of other organisations, such as other community groups, health  
57  
58 and social care services, third sector bodies, local authorities and local businesses was a widely  
59  
60

1  
2  
3 recurring theme in the data. Actively involving other organisations, minimising overlap, sharing  
4 knowledge and resources and offering something of benefit were all ways to encourage them to feel  
5 invested in supporting an intervention rather than threatened or indifferent to it (CMOC 122-CMOC  
6 131), in addition to pro-active awareness raising and networking (CMOC 110-CMOC 121). Good  
7 collaboration planning, with expert advice on collaborative working and continual attention to  
8 maintaining communication were strategies to avoid problems developing or loss of enthusiasm  
9 with partner organisations (CMOC 138-CMOC 152).

10  
11  
12  
13  
14  
15  
16  
17  
18  
19 On getting and keeping funding and income, salient CMOCs again involved continual  
20 networking and communication, for the reason that this would support multiple mechanisms: by  
21 reducing costs through sharing and partnership; boosting visibility, legitimacy and value in the eyes  
22 of potential and existing funders; and helping to locate more funding and income opportunities  
23 (CMOC 153-CMOC 175; CMOC 185-CMOC 190). Data made some reference to the importance of  
24 strategic planning in finding and managing funds, with outside expertise and dedicated personnel  
25 helpful in carrying this out (CMOC 170-CMOC 175; CMOC 191-CMOC 197). While tailoring an  
26 intervention to national (and therefore funders') priorities may increase its chances of obtaining  
27 funding, this is not always possible or desirable for a group (CMOC 180-CMOC 184). Groups in rural  
28 areas particularly, or experienced groups unable to find anything but short-term solutions, may have  
29 to raise greater awareness with commissioners and policy-makers about the specific challenges that  
30 face them, and lobby for change to ensure better conditions for groups in their situation long term  
31 (CMOC 170-CMOC 179; CMOC 198-CMOC 201). For example rural groups with a small number of  
32 members and personnel can struggle to meet funders demands, especially if put in competition with  
33 larger, well-resourced organisations.

### 34 **Recommendations for policy and commissioning**

35  
36  
37  
38  
39  
40  
41  
42  
43  
44  
45  
46  
47  
48  
49  
50  
51  
52  
53  
54  
55  
56  
57  
58  
59  
60  
In addition, 13 recommendations for policy-making and commissioning were also drawn (see Table  
3), for the most part mirroring those for practice and drawing on the same CMOCs.

### Recommendations for commissioning/policy-making

**Service users value the social side of an intervention highly, often more than the intervention or activity itself**

CMOC 1 – CMOC 2; CMOC 47 – CMOC 53 <sup>38 40 41 43 44 45 47 48 49 50 52 54 57 58 59 61 62 63 64 65 66 67 68 69 70 71 72 73 74 75</sup>

**Service users need to feel an intervention is "for them" to want to attend and keep attending**

CMOC 15 – CMOC 24; CMOC 66 – CMOC 70 <sup>37 41 43 44 45 46 47 48 49 50 53 56 57 58 59 60 61 62 63 64 65 66 67 69 70 71 72 73 74 75 76 77 78 79 80 81 82 83 84</sup>

**Lack of appropriate transport can be a major barrier to an intervention getting and keeping attendees**

CMOC 26 – CMOC 30; CMOC 65 <sup>36 37 38 44 45 47 48 49 50 56 57 59 60 61 64 65 73 76 77 78 82 85 86</sup>

**Health and social care services that may refer to an intervention need incentive and guidance to do so**

CMOC 42 – CMOC 44; CMOC 134 – CMOC 135 <sup>47 50 61 69 76 77 79 80 88</sup>

**To retain staff and volunteers there needs to be adequate financial support in place for roles and activities**

CMOC 105 – CMOC 109 <sup>50 51 67 73 79 84 87</sup>

**Established community organisations, including local authorities, can offer help in a number of ways to enable small-scale interventions to flourish**

CMOC 115 – CMOC 118 <sup>46 48 52 58 62 65 67 69 71 72 75 76 80 92 93</sup>

**Access to advice on how to create partnerships, collaborate and overcome differences in culture with other organisations can help**

CMOC 143 – CMOC 148 <sup>41 51 59 60 70 76 77 79 86</sup>

**Access to advice on how to effectively plan and network to help find and manage funding and income can help**

CMOC 170 – CMOC 175 <sup>37 46 55 60 61 80 86 91 94</sup>

**Commissioners should be flexible and accommodating of the challenges facing small groups regarding evidence gathering**

CMOC 176 – CMOC 179 <sup>50 84 91</sup>

**Policy makers should ensure policy meets local needs with adequate, protected and accessible resources attached**

CMOC 180 – CMOC 182; CMOC 184 <sup>39 41 42 50 51 55 59 76 77 80 84 86 87 91 95</sup>

**Longer term funding, with simplified application processes, would help smaller initiatives with less capacity to continue**

CMOC 195 – CMOC 197 <sup>70 80 84</sup>

**Longer term funding to support what is already being done will help retain and develop learning and practice on how best to meet local need**

CMOC 198 – CMOC 200 <sup>39 50 51 76 77 79 86 87</sup>

**Authorities and national organisations can help create conditions that encourage support for small initiatives, though policy, leadership and commissioning**

CMOC 132 – CMOC 137 <sup>39 47 50 51 59 69 77</sup>

**Table 3** Recommendations for commissioning/policy-making (For a full list of CMOCs see Supplementary file 6)

The final recommendation covers CMOCs unique to policy-making and commissioning, highlighting issues such as the detrimental effect of a disjoin between national policy and local need on an intervention finding support (as by adhering to one they will neglect the other) (CMOC 132). Practices that could benefit the sustainability of community interventions included ring-fencing funding specifically for dementia-targeted community initiatives; commissioning health and social care services to work with community initiatives; and developing health pathways around existing

1  
2  
3 community networks (CMOC 133-CMOC 135). National and official organisations can also encourage  
4  
5 a more strategic, joined up direction regarding community-based dementia support by showing  
6  
7 leadership in working with smaller, local initiatives and support for potential private sector partners  
8  
9  
10 (CMOC 136-CMOC 137).

## 11 12 13 **DISCUSSION**

### 14 15 16 **Summary of findings**

17  
18 Being able to continually get and hold on to members, staff and volunteers, the support of other  
19  
20 services and organisations, and funding/income are the key factors in the long-term sustainability of  
21  
22 a community-based intervention for people affected by dementia. There are multiple mechanisms  
23  
24 that feed into these sub-outcomes, sensitive to context. Ability to attract members was found to be  
25  
26 driven by perceptions that a group or activity was “for them”, and expectations they would be  
27  
28 welcomed, respected and supported without stigma once attending, as well as having motivated  
29  
30 referrers and low logistical barriers including transport. Members are more likely to keep attending if  
31  
32 they feel comfortable, at home, respected and empowered, with individual needs understood.  
33  
34 Opportunity for socialising was found to be of high importance no matter what intervention type,  
35  
36 with stability and reliability also important. Networking and outreach were found to be important in  
37  
38 getting staff and volunteers; feeling satisfied, valued and supported (including financially) was  
39  
40 important in keeping them. Proactive measures to raise awareness and involve other organisations,  
41  
42 avoiding conflict and sharing knowledge and resources, were found to help in securing essential  
43  
44 support, though requiring significant maintenance through skilled communication, planning and  
45  
46 working practices. Such networking and collaboration were found to be helpful in finding and  
47  
48 securing funding and income, with skilled planning and management of multiple income streams  
49  
50 helpful in sustaining long term. However, the often short term nature of funding was found to be a  
51  
52 barrier to retaining deep learning and experience, and disjoints between national policy and local  
53  
54 need a barrier to securing both funding and wider support. Challenges in meeting funders’  
55  
56  
57  
58  
59  
60

1  
2  
3 requirements and overcoming logistical barriers were especially acute for small-scale and rural  
4  
5 groups.  
6  
7

### 8 **Strengths and limitations**

9  
10  
11  
12 This review was designed to gather evidence regarding how regularly-meeting community-based  
13  
14 interventions for people affected by dementia can be sustained, not on the efficacy/effectiveness of  
15  
16 interventions of this type, hence conclusions regarding the latter are beyond its scope. Literature  
17  
18 was limited as this research question is not commonly the main focus of study in dementia care  
19  
20 research. This meant some CMOCs arrived at were the result of abundant data sources, while others  
21  
22 were not, hence the CMOCs here vary in robustness (see Supplementary file 6). While efforts were  
23  
24 made to exclude data of low rigour (see Supplementary file 3), it is the nature of a realist review to  
25  
26 include data from a variety of source types to build a theoretical model piecemeal; not all of the data  
27  
28 were of equal depth and detail and many will not meet the highest level of empirical rigour, rather  
29  
30 they contribute together in a way that is useful to the theoretical constructs that are the CMOCs and  
31  
32 overall programme theory.<sup>29</sup> The results of this review therefore should be taken as theory and sit in  
33  
34 relation to other research: SCI-Dem provides a theoretical framework which can be put to the test  
35  
36 and further refines by subsequent empirical research.<sup>29</sup> The breadth of intervention types covered in  
37  
38 this review is on the one hand a strength, as it has enabled the surfacing of commonalities in  
39  
40 experience likely relevant to a wide range of real-world initiatives broadly in the same category; on  
41  
42 the other hand, it means this review cannot be specific on certain details. An example is that little  
43  
44 could be concluded on the cost-effectiveness or economic functioning of the interventions covered,  
45  
46 because details were both too scant and too specific to draw robust CMOCs that might usefully be  
47  
48 applicable to others.  
49  
50  
51  
52  
53

54  
55 The practice of one researcher carrying out the bulk of article selection and data analysis,  
56  
57 with a second researcher independently checking 10% at each stage for consistency (along with  
58  
59 regular input and discussion with other members of the research team) is common in realist review,  
60

1  
2  
3 but nevertheless can be seen as a limitation, as in Cochrane-style systematic reviews double-  
4  
5 screening by two reviewers independently is recommended for greater reliability of results.  
6

7 However, it should be noted realist review is a theory-driven interpretive approach with significant  
8  
9 differences to more traditional forms of systematic review;<sup>30</sup> i.e. the aim is to develop an evidence-  
10  
11 informed theory rather than a comprehensive summation of all research data available on a  
12  
13 particular research question.  
14  
15

### 16 17 **Recommendations and comparison with existing literature**

18  
19  
20 Recommendations for practice and policy are presented in Tables 2 and 3 in the results section.

21  
22 However, they also highlight some common problems for which there may be no easy solution: for  
23  
24 example what to do in rural areas where public transport coverage is poor and potential members  
25  
26 and volunteers are few and widespread, given that transport to venue is a key factor in getting and  
27  
28 keeping members. The issue of whether interventions can be entirely self-sustaining or must rely on  
29  
30 service-level agreements and grant funding is also a key one. This review suggests that costs can be  
31  
32 reduced and income opportunities found by pro-active networking and collaborative working;  
33  
34 though rather than removing the need for grant funding, this is more likely useful in leveraging it,  
35  
36 adding to it and helping it to go further. Recent research into whether social enterprises delivering  
37  
38 adult social care services (not dementia specific) could be self-sustaining suggests that marketing is  
39  
40 key but needs to focus upon building relationships with stakeholders at multiple levels rather than  
41  
42 adopting an approach akin to selling a product:<sup>97</sup> networking and marketing are closely bound up  
43  
44 with each other. Delivering social quality as well as service quality, having a hybrid workforce and  
45  
46 diverse income streams to strengthen financial viability and reduce reliance on grants were also  
47  
48 found to help.<sup>98</sup> This review echoes all of these points with regards to dementia-targeted  
49  
50 community-based interventions, in particular that interventions cannot sustain without a cultivated  
51  
52 support network around them, as well as careful collaborative financial planning and management.  
53  
54  
55  
56  
57  
58  
59  
60

1  
2  
3 The emphasis found in this review on the value to members of social activity and a  
4 respectful, empowering person-centred approach, reinforces the benefits of community-based  
5 initiatives and regular social activity, both for people living with dementia and the people who care  
6 for them.<sup>12 13 14 15 16 17 18 19</sup> However, the time-limited nature of most research in this area is unhelpful  
7 when seeking data on the long-term sustainability of such interventions, with a large number of  
8 articles excluded from this review due to this. Recent systematic reviews have found that  
9 psychosocial interventions tend to be short term, with short-term trials only measuring short-term  
10 impact, and a pressing need for more longer-term studies with larger sample sizes.<sup>14 99</sup> However,  
11 there is a “chicken and egg” problem: if policy and commissioning is hesitant to support  
12 interventions unless there is evidence of robust statistical effects, then such interventions will  
13 struggle to sustain long enough, in enough abundance, to have the numbers to carry out the  
14 research required to produce that evidence. Equally, if research focuses only on  
15 efficacy/effectiveness without attention to the implementation process, and reporting of how costs  
16 were met and resources, personnel, and service users were found, then little can be learnt about  
17 sustaining them.

### 38 **Future research directions**

39  
40  
41 When drafting inclusion criteria for this review in 2018 it was decided to focus upon interventions  
42 that brought people together to meet physically and socially, as distinct from community services  
43 that go into people’s homes. It did not take into account virtual community activities or communities  
44 at-a-distance, which at the time seemed like a distinct niche. In 2020, however, this kind of activity  
45 became much more important, and integrated with the activities of existing community groups that  
46 met physically prior to the COVID-19 pandemic. With COVID-19 the landscape for community-based  
47 interventions has changed significantly, presenting further unprecedented challenges, but the need  
48 for groups that connect people socially remains acute. A recent study by the Alzheimer's Society<sup>11</sup>  
49 revealed COVID-19 restrictions have had particularly negative impacts on the health and well-being  
50  
51  
52  
53  
54  
55  
56  
57  
58  
59  
60



1  
2  
3 of people affected by dementia and their carers, a finding echoed by the Alzheimer's Disease  
4 International's update report for 2020.<sup>100</sup> Restrictions have forced changes to routine, causing  
5  
6 anxiety and strain in relationships; led to a reduction in skills and confidence; and increased pressure  
7  
8 on home carers, not least through the erosion of support systems.<sup>101</sup> Many support initiatives will  
9  
10 have ceased operating either temporarily or permanently. As the effects of the pandemic continue  
11  
12 to be felt, there is an urgent need for community-based interventions to find ways to keep going or  
13  
14 re-establish quickly when emerging from COVID-19 restrictions. While the data used in this review  
15  
16 predated the pandemic, it can provide a framework for new research to look at what sustainability-  
17  
18 impacting elements have been affected and how. This review presents a theoretical model of the  
19  
20 factors and mechanisms involved in the long-term sustainability of community-based interventions.  
21  
22 As such it is for further research to put this model to the test by comparing it empirically with real-  
23  
24 world interventions going forward, which will further refine and add to this programme theory in a  
25  
26 post-pandemic climate.  
27  
28  
29  
30  
31  
32  
33  
34  
35

36 **Word count: 5363**

### 37 38 **Figure legends**

39  
40  
41 **Figure 1** PRISMA flow diagram

42  
43  
44 **Figure 2** Factors affecting the sustainability of community-based groups and activities

### 45 46 47 **Author affiliations and email**

48  
49  
50 1 Association for Dementia Studies, University of Worcester, Worcester, UK. *t.morton@worc.ac.uk*

51  
52  
53 2 Nuffield Department of Primary Care Health Sciences, University of Oxford, Oxford, UK.

54  
55 *geoffrey.wong@phc.ox.ac.uk*

56  
57  
58 1 Association for Dementia Studies, University of Worcester, Worcester, UK. *t.atkinson@worc.ac.uk*

1  
2  
3 1 Association for Dementia Studies, University of Worcester, Worcester, UK. *d.brooker@worc.ac.uk*  
4  
5  
6  
7  
8

9 **Author Contributions** Authors Dawn Brooker and Teresa Atkinson conceptualised the study (along  
10 with Dr Shirley Evans of the University of Worcester, who co-wrote the protocol but does not meet  
11 the ICMJE criteria for authorship of this paper). Authors Geoffrey Wong and Thomas Morton had  
12 input into developing the study (along with information specialist Clive Kennard of the University of  
13 Worcester, who helped design the search strategy but does not meet the ICMJE criteria for  
14 authorship of this paper). The study was conducted by Dawn Brooker as principal investigator,  
15 Teresa Atkinson as project manager, Thomas Morton research associate and Geoffrey Wong  
16 providing methodological expertise. Thomas Morton wrote the first draft of this manuscript.  
17 Geoffrey Wong, Dawn Brooker and Teresa Atkinson critically contributed to and refined the  
18 originally submitted manuscript, as well as responses to reviewers' comments and the revised  
19 manuscript. All authors have read and approved the final manuscript.  
20  
21  
22  
23  
24  
25  
26  
27  
28  
29  
30  
31  
32

33  
34 **Corresponding Author** Professor Dawn Brooker, Director of the Association for Dementia Studies,  
35 School of Allied Health and Community, University of Worcester, Henwick Grove, Worcester WR2  
36 6AJ. Email: *d.brooker@worc.ac.uk*. Tel: 01905 855250  
37  
38  
39  
40

41 **Twitter** Follow Thomas Morton @ThomasMortonADS  
42  
43

44 **Original protocol:** <http://dx.doi.org/10.1136/bmjopen-2019-032109>  
45  
46

47 **Funding:** This work was supported by The Alzheimer's Society, Grant No: 402, AS-PG-17b-023. Gold  
48 Open Access Article Processing Charges met by the University of Worcester.  
49  
50

51  
52 **Acknowledgements** This project was funded by the Alzheimer's Society. Dr Shirley Evans  
53 (Association for Dementia Studies, University of Worcester) contributed to the writing of the  
54 protocol for this review. Clive Kennard (information specialist, University of Worcester), helped  
55 design, pilot and carry out the formal search. The authors would like to thank all those who shared  
56  
57  
58  
59  
60

1  
2  
3 their invaluable experience and contributed to advising and guiding this project as a stakeholder  
4 consultant: Alzheimer's Society research monitors Sue Comely, Maggie Ewer and Mair Graham;  
5  
6 Philly Hare, Rachael Litherland, Damian Murphy and Rachel Niblock of DEEP/Innovations in  
7  
8 Dementia, and all who attended the national meeting of DEEP groups at Woodbrooke,  
9  
10 Birmingham, July 2019; Teresa 'Dory' Davies, James McKillop and Dreane Williams of DEEP; Judith  
11  
12 Baron and the Face It Together DEEP group; Jill Turley and The Buddies DEEP group; the Friends for  
13  
14 Life DEEP group; Kim Badcock of Kim's Cafe (Denmead, Havant and Waterlooville, Hampshire); Jo  
15  
16 Barrow and the Forget Me Not Lunch and Friendship Club (Bicester, Oxfordshire); Elizabeth Bartlett  
17  
18 of the Laverstock Memory Support Group (Wiltshire); Shirley Bradley of Friends of the Elderly  
19  
20 (Worcester); David Budd of Our Connected Neighbourhoods (Stirling); Di Burbidge of Liverpool DAA  
21  
22 Diversity Sub-Group and Chinese Wellbeing (Liverpool); Kishwar Butt of the South Asian Ladies'  
23  
24 Milaap Group (Wolverhampton); Michelle Candlish of Ceartas Advocacy (Kirkintilloch, East  
25  
26 Dunbartonshire); Annette Darby of Brierly Hill Health and Social Care Centre (West Midlands); Sue  
27  
28 Denman of Solva Care (Haverfordwest); Gerry Fouracres of Scrubditch Farm (Cirencester); Graham  
29  
30 Galloway of Kirrie Connections (Kirriemuir, Angus); Reinhard Guss; Deborah Harrold of Agewell CIC  
31  
32 (Oldbury, West Midlands); June Hennell; Jacoba Huizenga of Health and Social Care in Communities,  
33  
34 Utrecht (Netherlands); Lynden Jackson of the Debenham Project (Suffolk); Ghazal Mazloumi of Trent  
35  
36 Dementia Services Development Centre; Cheryl Poole of Leominster Meeting Centre; Anita  
37  
38 Tomaszewski and Jennifer Williams of Me, Myself and I (Briton Ferry, Neath Port Talbot); Dame  
39  
40 Louise Robinson; Droitwich Meeting Centre; Leominster Meeting Centre; the members of the  
41  
42 UKMCSP National Reference Group; and Jennifer Bray, Shirley Evans, Nicola Jacobson-Wright, Chris  
43  
44 Russell and Mike Watts of the Association for Dementia Studies, University of Worcester.  
45  
46  
47  
48  
49  
50  
51  
52

53 **Competing interests** Geoffrey Wong is Deputy Chair of the National Institute for Health Research  
54  
55 Health Technology Assessment Prioritisation Committee: Integrated Community Health and Social  
56  
57 Care (A).  
58  
59  
60

**Disclaimer** The views and opinions expressed therein are those of the authors and do not necessarily reflect those of the Alzheimer's Society.

**Ethics approval** Not applicable.

**PROSPERO registration number** CRD42019125889.

**Data availability statement** This study was a qualitative review of secondary data, hence no new primary dataset was generated. However, we can share more information on what data was extracted and how it was analysed if requested. Please contact Thomas Morton at [t.morton@worc.ac.uk](mailto:t.morton@worc.ac.uk), ORCID 0000-0001-8264-0834

**Open Access** This is an Open Access article distributed in accordance with the terms of the Creative Commons Attribution (CC BY 4.0) license, which permits others to distribute, remix, adapt and build upon this work, for commercial use, provided the original work is properly cited. See: <http://creativecommons.org/licenses/by/4.0/>

## REFERENCES

1. World Health Organisation. *Global action plan on the public health response to dementia 2017-2025*. Geneva: world Health Organisation, 2017. [https://www.who.int/mental\\_health/neurology/dementia/action\\_plan\\_2017\\_2025/en/](https://www.who.int/mental_health/neurology/dementia/action_plan_2017_2025/en/)
2. Office for National Statistics (ONS). *Living longer: Caring in later life*. London: ONS, 2019. <https://www.ons.gov.uk/peoplepopulationandcommunity/birthsdeathsandmarriages/ageing/articles/livinglongerhowourpopulationischangingandwhyitmatters/2019-03-15>
3. Care Quality Commission. *The state of health care and adult social care in England 2018/19*. Newcastle-upon-Tyne: Care Quality Commission, 2019. [https://www.cqc.org.uk/sites/default/files/20191015b\\_stateofcare1819\\_fullreport.pdf](https://www.cqc.org.uk/sites/default/files/20191015b_stateofcare1819_fullreport.pdf)
4. Department of Health. *Prime Minister's challenge on dementia 2020*. London: Department of Health, 2015. [https://assets.publishing.service.gov.uk/government/uploads/system/uploads/attachment\\_data/file/414344/pm-dementia2020.pdf](https://assets.publishing.service.gov.uk/government/uploads/system/uploads/attachment_data/file/414344/pm-dementia2020.pdf)
5. Incisive Health. *Care deserts: the impact of a dysfunctional market in adult social care provision*. London: Incisive Health, 2019: <https://www.incisivehealth.com/wp-content/uploads/2019/05/care-deserts-age-uk-report.pdf>
6. Age UK. *Briefing: Health and Care of Older People in England 2019*. London: Age UK, 2019. [https://www.ageuk.org.uk/globalassets/age-uk/documents/reports-and-publications/reports-and-briefings/health--wellbeing/age\\_uk\\_briefing\\_state\\_of\\_health\\_and\\_care\\_of\\_older\\_people\\_july2019.pdf](https://www.ageuk.org.uk/globalassets/age-uk/documents/reports-and-publications/reports-and-briefings/health--wellbeing/age_uk_briefing_state_of_health_and_care_of_older_people_july2019.pdf)
7. Alzheimer's Society. *A lonely future: 120,000 people with dementia living alone, set to double in the next 20 years*. London: Alzheimer's Society, 2019. <https://www.alzheimers.org.uk/news/2019-05-15/lonely-future-120000-people-dementia-living-alone-set-double-next-20-years>

- 1
  - 2
  - 3
  - 4
  - 5
  - 6
  - 7
  - 8
  - 9
  - 10
  - 11
  - 12
  - 13
  - 14
  - 15
  - 16
  - 17
  - 18
  - 19
  - 20
  - 21
  - 22
  - 23
  - 24
  - 25
  - 26
  - 27
  - 28
  - 29
  - 30
  - 31
  - 32
  - 33
  - 34
  - 35
  - 36
  - 37
  - 38
  - 39
  - 40
  - 41
  - 42
  - 43
  - 44
  - 45
  - 46
  - 47
  - 48
  - 49
  - 50
  - 51
  - 52
  - 53
  - 54
  - 55
  - 56
  - 57
  - 58
  - 59
  - 60
8. Cornwell EY, Waite, LJ. Social disconnectedness, perceived isolation and health among older adults. *J Health Soc Behav* 2009; 50(1):31–48. doi.org/10.1177/002214650905000103
  9. Holt-Lunstad J, Smith TB, Baker M, Harris T, Stephenson D. Loneliness and social isolation as risk factors for mortality: A meta-analytic review. *Perspect Psychol Sci* 2015; 10(2):227–237. doi.org/10.1177/1745691614568352
  10. Brodaty H, Donkin M. Family carers of people with dementia. *Dialogues Clin Neurosci* 2009; 11(2):217–228.
  11. Alzheimer's Society. *Worst hit: Dementia during coronavirus*. London: Alzheimer's Society, 2020. <https://www.alzheimers.org.uk/sites/default/files/2020-09/Worst-hit-Dementia-during-coronavirus-report.pdf>
  12. Brooker D, Evans SC, Evans SB, et al. Evaluation of the implementation of the Meeting Centres Support Program in Italy, Poland, and the UK; exploration of the effects on people with dementia. *Int J Geriatr Psychiatry* 2018; 33(7):883–892. doi: 10.1002/gps.4865.
  13. Evans SB, Evans SC, Brooker D, et al. The impact of the implementation of the Dutch combined Meeting Centres Support Programme for family caregivers of people with dementia in Italy, Poland and UK. *Aging Ment Health* 2018; doi: 10.1080/13607863.2018.1544207
  14. Lord K, Beresford-Dent J, Rapaport P, et al. Developing the New Interventions for Independence in Dementia Study (NIDUS) theoretical model for supporting people to live well with dementia at home for longer: a systematic review of theoretical models and Randomised Controlled Trial evidence. *Soc Psychiatry Psychiatr Epidemiol* 2019; doi: 10.1007/s00127-019-01784-w
  15. McDermott O, Charlesworth G, Hogervorst E, et al. Psychosocial interventions for people with dementia: a synthesis of systematic reviews. *Aging Ment Health* 2019; 23(4):393–403. doi: 10.1080/13607863.2017.1423031
  16. Van't Leven N, Prick AE, Groenewoud JG, et al. Dyadic interventions for community-dwelling people with dementia and their family caregivers: a systematic review. *Int Psychogeriatr* 2013; 25(10):1581–1603.
  17. Dröes RM, Van Mierlo LD, Meiland FJM, Van der Roest HG. Memory problems in dementia: Adaptation and coping strategies, and psychosocial treatments. *Expert Rev Neurother* 2011; 11(12):1769–1782.
  18. Dröes RM, Meiland F, Schmitz MJ, Van Tilburg W. Effect of combined support for people with dementia and carers versus regular day care on behaviour and mood of persons with dementia: Results from a multi-centre implementation study. *Int J Geriatr Psychiatry* 2004; 19(7):673–684.
  19. Dröes RM, Meiland FJM, Schmitz MJ, Van Tilburg W. Effect of the Meeting Centres Support Program on informal carers of people with dementia: Results from a multi-centre study. *Aging Ment Health* 2006; 10(2):112–124.
  20. Wittenberg R, Hu B, Barraza-Araiza L, Rehill A. *Projections of older people with dementia and costs of dementia care in the United Kingdom, 2019–2040 (CPEC Working Paper 50)*. London: LSE, 2019. [https://www.alzheimers.org.uk/sites/default/files/2019-11/cpec\\_report\\_november\\_2019.pdf](https://www.alzheimers.org.uk/sites/default/files/2019-11/cpec_report_november_2019.pdf)
  21. Dröes RM, Breebaart E, Meiland FJ, et al. Effect of Meeting Centres Support Program on feelings of competence of family carers and delay of institutionalization of people with dementia. *Aging Ment Health* 2004; 8(3):201–211. doi.org/10.1080/13607860410001669732
  22. Dröes RM, Meiland FJM, Schmitz M, van Tilburg W. Effect of combined support for people with dementia and carers versus regular day care on behaviour and mood of persons with dementia: results from a multicentre implementation study. *Int J Geriatr Psychiatry* 2004; 19:1–12.
  23. Booth A, Clarke M, Ghersi D, et al. An international registry of systematic-review protocols. *Lancet* 2011; 377:108–9.
  24. Morton T, Atkinson T, Brooker D, et al. Sustainability of community-based interventions for people affected by dementia: a protocol for the SCI-Dem realist review. *BMJ Open* 2019; 9:e032109. doi: 10.1136/bmjopen-2019-032109
  25. Pawson R. *Evidence-based Policy: A Realist Perspective*. London: Sage Publications, 2006.
  26. Pawson R, Greenhalgh T, Harvey G, Walshe K. Realist review – a new method of systematic review designed for complex policy interventions. *J Health Serv Res Policy* 2005; 10(1):21–24.
  27. Jagosh J, Macaulay AC, Salsberg J, et al. Uncovering the benefits of participatory research: implications of a realist review for health research and practice. *Milbank Q* 2012; 90:311–46.
  28. Astbury B, Leeuw F. Unpacking black boxes: mechanisms and theory building in evaluation. *Am J Eval* 2010; 31:363–81.
  29. Pawson R, Greenhalgh T, Harvey G, et al. *Realist Synthesis – An Introduction*. ESRC Working Paper Series. London: ESRC, 2004.

- 1
  - 2
  - 3
  - 4
  - 5
  - 6
  - 7
  - 8
  - 9
  - 10
  - 11
  - 12
  - 13
  - 14
  - 15
  - 16
  - 17
  - 18
  - 19
  - 20
  - 21
  - 22
  - 23
  - 24
  - 25
  - 26
  - 27
  - 28
  - 29
  - 30
  - 31
  - 32
  - 33
  - 34
  - 35
  - 36
  - 37
  - 38
  - 39
  - 40
  - 41
  - 42
  - 43
  - 44
  - 45
  - 46
  - 47
  - 48
  - 49
  - 50
  - 51
  - 52
  - 53
  - 54
  - 55
  - 56
  - 57
  - 58
  - 59
  - 60
30. Wong G, Greenhalgh T, Westhorp G, Pawson R. Development of methodological guidance, publication standards and training materials for realist and meta-narrative reviews: the RAMESES (Realist And Meta-narrative Evidence Syntheses - Evolving Standards) project. *Health Serv Deliv Res* 2014; 2(30):1-252.
31. DEEP. *DEEP: The UK Network of Dementia Voices* website. 2020. <http://dementivoices.org.uk>
32. Greenhalgh T, Peacock R. Effectiveness and efficiency of search methods in systematic reviews of complex evidence: audit of primary sources. *BMJ* 2005; 331:1064.
33. Booth A, Harris J, Croot E, *et al.* Towards a methodology for cluster searching to provide conceptual and contextual “richness” for systematic reviews of complex interventions: case study (CLUSTER). *BMC Med Res Methodol* 2013; 13:118.
34. Wong G. Data gathering in realist reviews: Looking for needles in haystacks. In: Emmel, N, Greenhalgh J, Manzano A, *et al.* (eds.) *Doing Realist Research*. London: Sage Publications, 2018:131-145.
35. Pawson R. Digging for nuggets: How ‘bad’ research can yield ‘good’ evidence. *Int J Soc Res Methodol* 2006; 9(2):127-142.
36. Actifcare. *Best practice recommendations from the Actifcare study: Access to community care services for home-dwelling people with dementia and their carers*. [www.actifcare.eu](http://www.actifcare.eu). Bangor: Dementia Services Development Centre Wales, 2017. [http://dsdc.bangor.ac.uk/documents/ShortversionBestPracticeRecommendationwithoutsupportingfindings\\_000.pdf](http://dsdc.bangor.ac.uk/documents/ShortversionBestPracticeRecommendationwithoutsupportingfindings_000.pdf)
37. Daykin N, Julier G, Tomlinson A, *et al.* *Review of the grey literature: music, singing and wellbeing*. London: What Works Wellbeing, 2016. <https://whatworkswellbeing.files.wordpress.com/2016/11/grey-literature-review-music-singing-wellbeing-nov2016.pdf>
38. Hochgraeber I, Kutzleben MV, Bartholomeyczik S, Holle B. Low-threshold support services for people with dementia within the scope of respite care in Germany – A qualitative study on different stakeholders’ perspective. *Dementia* 2015; 16(5):576-590. doi:10.1177/1471301215610234
39. McDonald A, Heath B. Developing services for people with dementia. *Work Older People* 2009; 13(3):18-21. doi:10.1108/13663666200900045
40. Strandenæs MG, Lund A, Rokstad AM. Experiences of attending day care services designed for people with dementia – a qualitative study with individual interviews. *Aging Ment Health* 2017; 22(6):764-772. doi:10.1080/13607863.2017.1304892
41. Van Mierlo L, Chattat R, Evans S, *et al.* Facilitators and barriers to adaptive implementation of the Meeting Centers Support Program (MCSP) in three European countries; the process evaluation within the MEETINGDEM study. *Int Psychogeriatr* 2017; 30(4):527-537. doi:10.1017/s1041610217001922
42. Brooker D, Evans SB, Evans SC, *et al.* *Meeting Centres Support Programme UK: Overview, evidence and getting started*. Worcester: Association for Dementia Studies, University of Worcester, 2017. <https://www.worcester.ac.uk/documents/Meeting-Centres-Support-Programme-Overview-evidence-and-getting-started-Conference-booklet.pdf>
43. Glover C. *Running self-help groups in sheltered and extra care accommodation for people who live with dementia*. London: Mental Health Foundation, 2014. <https://www.mentalhealth.org.uk/sites/default/files/dementia-self-help-guide.pdf>
44. Reichet M, Wolter V. *Sport for People With Dementia – Implementing Physical Activity Programs (PAP) For People With Dementia: Results From A German Study (conference poster)*. Dortmund: TU Dortmund University, 2017.
45. Reichet M, Wolter V. Implementing physical activity programs for people with dementia: Results from a German study. *Innov Aging* 2017; 1(Suppl\_1):340-340. doi:10.1093/geroni/igx004.1247
46. The Me Myself and I Club. *The Me, Myself and I Club, Briton Ferry: A case study in warm humanity and meaningful co-production*. Neath Port Talbot: The Me Myself and I Club, 2018. <https://info.copronet.wales/me-myself-and-i-club-briton-ferry/>
47. Older People’s Commissioner for Wales. *Rethinking respite for people affected by dementia*. Cardiff: Older People’s Commissioner for Wales, 2018. <http://www.olderpeoplewales.com/en/Reviews/respite.aspx>
48. Bould E, McFayden S, Thomas C. *Dementia-friendly sport and physical activity guide*. London: Alzheimer’s Society, 2019. <https://www.alzheimers.org.uk/get-involved/dementia-friendly-communities/organisations/dementia-friendly-sports>
49. Green G, Lakey L. *Building dementia-friendly communities: a priority for everyone*. London: Alzheimer’s Society, 2013. [https://actonalz.org/sites/default/files/documents/Dementia\\_friendly\\_communities\\_full\\_report.pdf](https://actonalz.org/sites/default/files/documents/Dementia_friendly_communities_full_report.pdf)
50. Marshall J, Jackson L. *Encouraging and supporting the growth of “dementia proactive communities”*. Ipswich: Sue Ryder/The Debenham Project, 2015. <http://www.the-debenham-project.org.uk/downloads/conference/Supplementary%20contributions/Lynden%20Jackson%20%20%20Jo%20Marshall/Lynden%20Jackson%20%20%20Jo%20Marshall%20-%20Supplementary%20Contribution.pdf>



- 1
  - 2
  - 3
  - 4
  - 5
  - 6
  - 7
  - 8
  - 9
  - 10
  - 11
  - 12
  - 13
  - 14
  - 15
  - 16
  - 17
  - 18
  - 19
  - 20
  - 21
  - 22
  - 23
  - 24
  - 25
  - 26
  - 27
  - 28
  - 29
  - 30
  - 31
  - 32
  - 33
  - 34
  - 35
  - 36
  - 37
  - 38
  - 39
  - 40
  - 41
  - 42
  - 43
  - 44
  - 45
  - 46
  - 47
  - 48
  - 49
  - 50
  - 51
  - 52
  - 53
  - 54
  - 55
  - 56
  - 57
  - 58
  - 59
  - 60
51. Clarke CL, Keyes SE, Wilkinson H, *et al*. Organisational space for partnership and sustainability: Lessons from the implementation of the National Dementia Strategy for England. *Health Soc Care Community* 2014; 22(6):634-645. doi:10.1111/hsc.12134
52. Health Innovation Network South London. *Case Study: Dulwich Helpline and Southwark Churches Care (DH&SCC) – The Dementia Project, Southwark, South London*. London: Health Innovation Network South London, 2015. [http://www.hin-southlondon.org/system/resources/resources/000/000/083/original/Case\\_Study\\_The\\_Healthy\\_Living\\_Club.pdf?1426083299](http://www.hin-southlondon.org/system/resources/resources/000/000/083/original/Case_Study_The_Healthy_Living_Club.pdf?1426083299)
53. La Rue A, Felten K, Turkstra L. Intervention of multi-modal activities for older adults with dementia translation to rural communities. *Am J Alzheimers Dis Other Demen* 2015; 30(5):468-477. doi:10.1177/1533317514568888
54. Mason T, Slack G. *The Debenham Project: Research into the dementia/memory loss journey for cared-for and carer, 2012-13*. Norwich: Norfolk & Suffolk Dementia Alliance, 2013. [http://www.the-debenham-project.org.uk/downloads/articles/2014/DebProjResearch\\_Final\\_Report\\_311013.pdf](http://www.the-debenham-project.org.uk/downloads/articles/2014/DebProjResearch_Final_Report_311013.pdf)
55. Meiland FJ, Dröes RM, Lange J, Vernooij-Dassen M. Development Of A Theoretical Model For Tracing Facilitators And Barriers In Adaptive Implementation Of Innovative Practices In Dementia Care. *Arch Gerontol Geriatr* 2004; 38:279-290. doi:10.1016/j.archger.2004.04.038
56. Solutions Research. *Public perceptions and experiences of community-based end of life care initiatives: a qualitative research report*. London: Public Health England, 2016. [https://assets.publishing.service.gov.uk/government/uploads/system/uploads/attachment\\_data/file/569711/Public\\_Perceptions\\_of\\_Community\\_Based\\_End\\_of\\_Life\\_Care\\_Initiatives\\_Research\\_Report.pdf](https://assets.publishing.service.gov.uk/government/uploads/system/uploads/attachment_data/file/569711/Public_Perceptions_of_Community_Based_End_of_Life_Care_Initiatives_Research_Report.pdf)
57. Cahill S, Pierce M, Bobersky A. *An evaluation report on flexible respite options of the Living Well With Dementia project in Stillorgan and Blackrock*. Dublin: Trinity College, 2014. [http://dementia.ie/images/uploads/site-images/Evaluation\\_Flexible\\_Respite\\_Options.pdf](http://dementia.ie/images/uploads/site-images/Evaluation_Flexible_Respite_Options.pdf)
58. Carone L, Tischler V, Dening T. Football and dementia: A qualitative investigation of a community based sports group for men with early onset dementia. *Dementia* 2016; 15(6):1358-1376. doi:10.1177/1471301214560239
59. Gajardo J, Aravena JM, Budinich M, *et al*. The Kintun program for families with dementia: From novel experiment to national policy (innovative practice). *Dementia* 2017; 19(2):488-495. doi:10.1177/1471301217721863
60. Grinberg A, Lagunoff J, Phillips D, *et al*. Multidisciplinary design and implementation of a day program specialized for the frontotemporal dementias. *Am J Alzheimers Dis Other Demen* 2008; 22(6):499-506. doi:10.1177/1533317507308780
61. Meiland FJ, Dröes RM, Lange JD, Vernooij-Dassen MJ. Facilitators and barriers in the implementation of the meeting centres model for people with dementia and their carers. *Health Policy* 2005; 71(2):243-253. doi:10.1016/j.healthpol.2004.08.011
62. Rio R. A Community-Based Music Therapy Support Group for People With Alzheimer's Disease and Their Caregivers: A Sustainable Partnership Model. *Front Med* 2018; 5. doi:10.3389/fmed.2018.00293
63. Gottlieb-Tanaka D. *Creative expression, dementia and the therapeutic environment (PhD Thesis)*. Vancouver: University of British Columbia, 2006. <https://open.library.ubc.ca/cIRcle/collections/ubctheses/831/items/1.0076821>
64. Mapes N, Milton S, Nicholls V, Williamson T. *Is it nice outside? Consulting people living with dementia and their carers about engaging with the natural environment*. Natural England Commissioned Reports, Number 211. York: Natural England, 2016. <http://publications.naturalengland.org.uk/publication/5910641209507840>
65. Brataas HV, Bjugan H, Wille T, Hellzen O. Experiences of day care and collaboration among people with mild dementia. *J Clin Nurs* 2010; 19(19-20):2839-2848. doi:10.1111/j.1365-2702.2010.03270.x
66. Casey J. Early Onset Dementia: Getting Out and About. *Journal of Dementia Care* July/August 2004; 12(4):12-13.
67. Oliver-Watkins F, Kendall N, Matthews T. *Sow & Grow: Report from a two-year Social and Therapeutic Horticultural (STH) programme delivering table-top gardening courses to adults in the community aged 50 and over*. Reading: Thrive, 2016.
68. Williams B, Roberts P. Friends in passing: Social interaction at an adult day care center. *Int J Aging Hum Dev* 1995; 41(1):63-78. doi:10.2190/ghhw-v1qr-nacx-vbcb
69. Alzheimer's Australia. *The benefits of physical activity and exercise for people living with dementia (Discussion paper 11)*. Sydney: Alzheimer's Australia, 2014. [https://www.dementia.org.au/sites/default/files/NSW/documents/AANSW\\_DiscussionPaper11.pdf](https://www.dementia.org.au/sites/default/files/NSW/documents/AANSW_DiscussionPaper11.pdf)
70. Hayes R, Williamson M. *Men's Sheds: Exploring the Evidence for Best Practice*. Melbourne: La Trobe University, 2007. <https://www.researchgate.net/publication/259313489>



- 1
- 2
- 3 71. Milligan C, Payne S, Bingley A, Cockshott Z. Place and wellbeing: Shedding light on activity interventions for older men. *Ageing Soc* 2013; 35(1):124-149. doi:10.1017/s0144686x13000494
- 4
- 5 72. Tuppen J. The benefits of groups that provide cognitive stimulation for people with dementia. *Nurs Older People* 2012; 24(10):20-24. doi:10.7748/nop2012.12.24.10.20.c9437
- 6
- 7 73. Mental Health Foundation. *An evaluation of the Standing Together project*. London: Mental Health Foundation, 2018. <https://www.mentalhealth.org.uk/sites/default/files/standing-together-evaluation-WEB.pdf>
- 8
- 9 74. Thrive. *Growing4life - A Thrive Community Gardening Project: A practical guide to setting up a community gardening project for people affected by mental ill health*. Reading: Thrive, 2012. <https://www.lumi.org.uk/assets/resources-toolkits/event-and-projects/G4L-Resource-Book.pdf>
- 10
- 11 75. Tuppen J, Burton-Jones J. Cogs Clubs: a helpful activity in early dementia. *Journal of Dementia Care* September/October 2015; 23(5):20-21.
- 12
- 13 76. Dean J, Silversides K, Crampton J, Wrigley J. *Evaluation of the Bradford Dementia Friendly Communities Programme*. York: Josph Rowntree Foundation, 2015. <https://www.jrf.org.uk/report/evaluation-bradford-dementia-friendly-communities-programme>
- 14
- 15 77. Dean J, Silversides K, Crampton J, Wrigley J. *Evaluation of the York Dementia Friendly Communities Programme*. York: Josph Rowntree Foundation, 2015. <https://www.jrf.org.uk/report/evaluation-york-dementia-friendly-communities-programme>
- 16
- 17 78. Noimuenwai P. *Effectiveness of adult day care programs on health outcomes of Thai family caregivers of persons with dementia (PhD Thesis)*. Kansas: University of Kansas, 2012. [https://kuscholarworks.ku.edu/bitstream/handle/1808/11440/Noimuenwai\\_ku\\_0099D\\_12475\\_DATA\\_1.pdf?sequence=1&isAllowed=y](https://kuscholarworks.ku.edu/bitstream/handle/1808/11440/Noimuenwai_ku_0099D_12475_DATA_1.pdf?sequence=1&isAllowed=y)
- 18
- 19 79. Van Haeften-Van Dijk A, Meiland F, Mierlo LV, Dröes RM. Transforming nursing home-based day care for people with dementia into socially integrated community day care: Process analysis of the transition of six day care centres. *Int J Nurs Stud* 2015; 52(8), 1310-1322. doi:10.1016/j.ijnurstu.2015.04.009
- 20
- 21 80. Health Innovation Network South London. *Peer Support for People with Dementia Resource Pack*. London: Health Innovation Network South London, 2015. <https://dementiapartnerships.com/resource/dementia-peer-support-resource-pack/>
- 22
- 23 81. Hikichi H, Kondo K, Takeda T, Kawachi I. Social interaction and cognitive decline: Results of a 7-year community intervention. *Alzheimers Dement (N Y)* 2017; 3:23-32. doi:10.1016/j.trci.2016.11.003
- 24
- 25 82. Hochgraeber I, Bartholomeyczik S, Holle B. Low-threshold support for families with dementia in Germany. *BMC Res Notes* 2012; 5(1). doi:10.1186/1756-0500-5-317
- 26
- 27 83. La Rue A, Felten K, Duschene K, et al. Language-enriched exercise plus socialization for older adults with dementia: Translation to rural communities. *Semin Speech Lang* 2013; 34(03):170-184. doi:10.1055/s-0033-1358370
- 28
- 29 84. Lockwood S. *The Debenham Project: A case study of a unique community-led and owned project dedicated to the support of carers of those that have symptoms of dementia and those they care for*. Harrogate: Community Catalysts CIC, 2012. <http://www.the-debenham-project.org.uk/downloads/articles/2012/121106report.pdf>
- 30
- 31 85. Health Innovation Network South London. *Case Study: The Healthy Living Club (HLC) – A self-directed, dementia-centred community group in Stockwell, London*. London: Health Innovation Network South London, 2015. [http://www.hin-southlondon.org/system/resources/resources/000/000/084/original/Case\\_Study\\_The\\_Dulwich\\_Helpline\\_and\\_Southwark\\_Churches.pdf?1426083406](http://www.hin-southlondon.org/system/resources/resources/000/000/084/original/Case_Study_The_Dulwich_Helpline_and_Southwark_Churches.pdf?1426083406)
- 32
- 33 86. Mangiaracina F, Chattat R, Farina E, et al. Not re-inventing the wheel: The adaptive implementation of the meeting centres support programme in four European countries. *Aging Ment Health* 2016; 21(1):40-48. doi:10.1080/13607863.2016.1258540
- 34
- 35 87. Jackson L. *The Debenham Project: Project Blog and Catch-Up (August 2017)*. Debenham, Suffolk: The Debenham Project, 2017. <http://www.the-debenham-project.org.uk/downloads/newsletters/blogs/1708.pdf>
- 36
- 37 88. McAiney CA, Hillier LM, Stolee P, et al. 'Throwing a lifeline': The role of First Link™ in enhancing support for individuals with dementia and their caregivers. *Neurodegener Dis Manag* 2012; 2(6):623-638. doi:10.2217/nmt.12.66
- 38
- 39 89. Moore KD. Observed affect in a dementia day center: Does the physical setting matter? *Alzheimers Care Q* 2002; 3(1):67-73.
- 40
- 41 90. Arthur A, Buckner S, Buswell M, et al. *DEMCOM: National Evaluation of Dementia Friendly Communities (Executive Summary)*. Cambridge: Applied Research Collaboration (ARC) East of England, 2020.
- 42
- 43
- 44
- 45
- 46
- 47
- 48
- 49
- 50
- 51
- 52
- 53
- 54
- 55
- 56
- 57
- 58
- 59
- 60

- 1
  - 2
  - 3
  - 4
  - 5
  - 6
  - 7
  - 8
  - 9
  - 10
  - 11
  - 12
  - 13
  - 14
  - 15
  - 16
  - 17
  - 18
  - 19
  - 20
  - 21
  - 22
  - 23
  - 24
  - 25
  - 26
  - 27
  - 28
  - 29
  - 30
  - 31
  - 32
  - 33
  - 34
  - 35
  - 36
  - 37
  - 38
  - 39
  - 40
  - 41
  - 42
  - 43
  - 44
  - 45
  - 46
  - 47
  - 48
  - 49
  - 50
  - 51
  - 52
  - 53
  - 54
  - 55
  - 56
  - 57
  - 58
  - 59
  - 60
91. Kelsey SG, Laditka SB. Evaluating best practices for social model programs for adults with Alzheimer's disease in South Carolina. *Home Health Care Serv Q* 2006; 24(4):21-46. doi:10.1300/j027v24n04\_02
92. Arkin SM, Morrow-Howell N. Elder Rehab: A student-supervised exercise program for Alzheimer's patients. *Gerontologist* 1999; 39(6):729-735. doi:10.1093/geront/39.6.729
93. LeBlanc LA. Integrating behavioral psychology services into adult day programming for individuals with dementia. *BehavModif* 2010; 34(5):443-458. doi:10.1177/0145445510383528
94. NCVO. *How To Fundraise In Tough Times*. London: NCVO, 2019. <https://knowhow.ncvo.org.uk/how-to/how-to-fundraise-in-tough-times>
95. Wimo A, Wallin J, Lundgren K, et al. Impact of day care on dementia patients—costs, well-being and relatives' views. *Fam Pract* 1990; 7(4):279-287. doi:10.1093/fampra/7.4.279
96. Shnall A, Agate A, Grinberg A, et al. Development of supportive services for frontotemporal dementias through community engagement. *Int Rev Psychiatry* 2013; 25(2):246-252. doi:10.3109/09540261.2013.767780
97. Powell M, Osborne SP. Social enterprises, marketing, and sustainable public service provision. *International Review of Administrative Sciences* 2020; 86(1):62-79. doi:10.1177/0020852317751244
98. Powell M, Gillett A, Doherty B. Sustainability in social enterprise: hybrid organizing in public services. *Public Management Review* 2019; 21(2):159-186. doi:10.1080/14719037.2018.1438504
99. Oyeboode JR, Parveen S. Psychosocial interventions for people with dementia: An overview and commentary on recent developments. *Dementia* 2019; 18(1):8–35. doi: 10.1177/1471301216656096
100. Barbarino P, Lynch C, Bliss A, et al. *From Plan to Impact III: Maintaining dementia as a priority in unprecedented times*. London: Alzheimer's Disease International, 2020. <https://www.alzint.org/u/from-plan-to-impact-2020.pdf>
101. Canevelli M, Valletta M, Toccaceli Blasi M, et al. Facing Dementia During the COVID-19 Outbreak. *J Am Geriatr Soc* 2020; 68(8):1673–1676. <https://doi.org/10.1111/jgs.16644>

1  
2  
3  
4  
5  
6  
7  
8  
9  
10  
11  
12  
13  
14  
15  
16  
17  
18  
19  
20  
21  
22  
23  
24  
25  
26  
27  
28  
29  
30  
31  
32  
33  
34  
35  
36  
37  
38  
39  
40  
41  
42  
43  
44  
45  
46  
47  
48  
49  
50  
51  
52  
53  
54  
55  
56  
57  
58  
59  
60

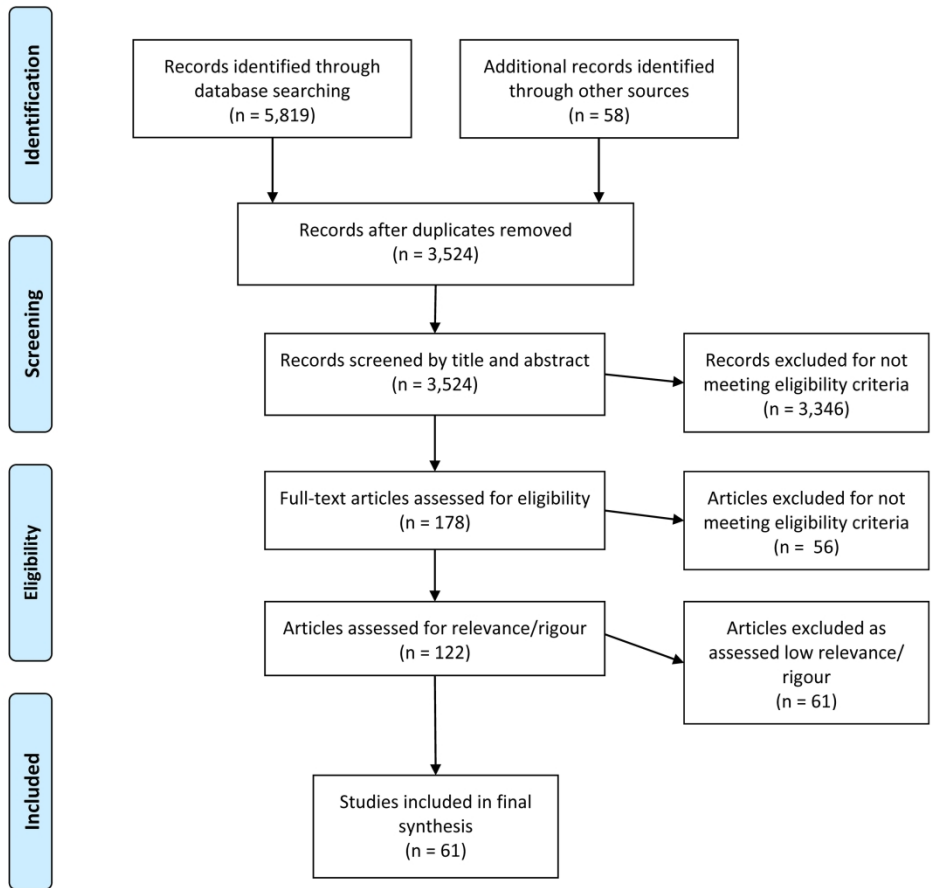

Figure 1 PRISMA flow diagram

133x130mm (600 x 600 DPI)



Figure 2 Factors affecting the sustainability of community-based groups and activities

164x106mm (1200 x 1200 DPI)

## Supplementary file 1: Initial programme theory diagrams and coding themes

### Key to colour coding:

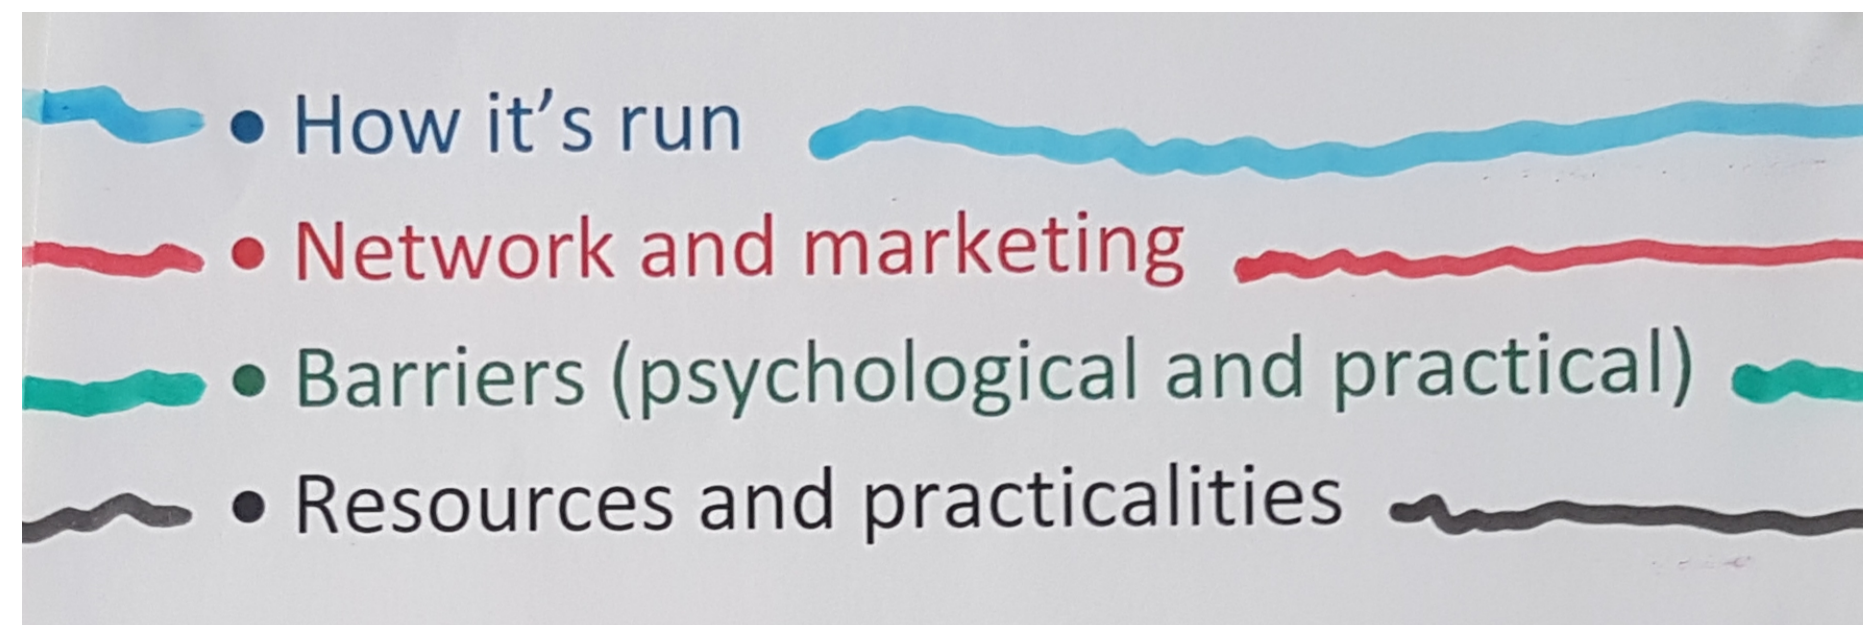



Barriers and facilitators to engagement



Barriers and facilitators to sustainability

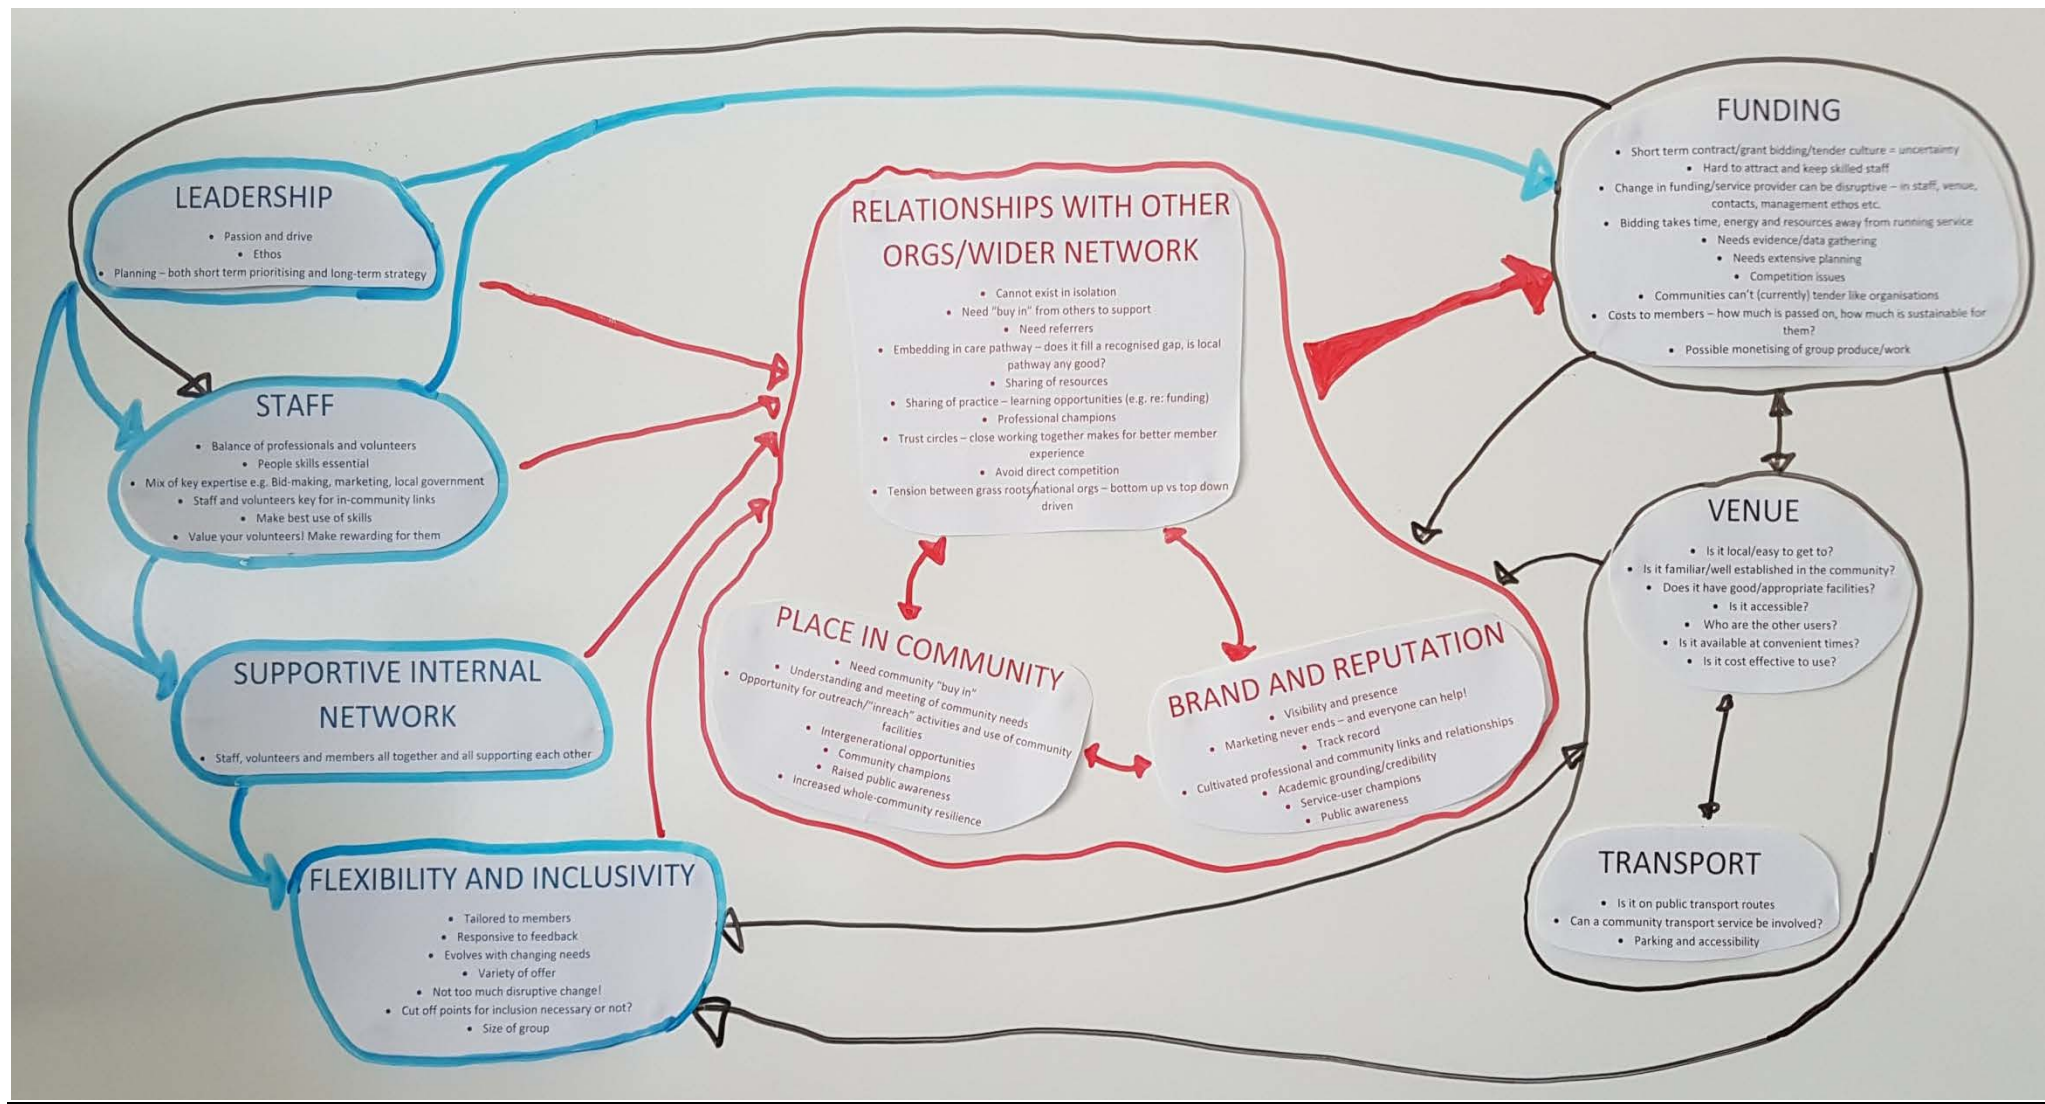



Top-level “parent” coding categories in NVivo analysis of the data

| Name                                                    | Files | References |     |
|---------------------------------------------------------|-------|------------|-----|
| Leadership                                              |       | 54         | 226 |
| Management of members (inc flexibility and inclusivity) |       | 66         | 219 |
| Staff and volunteer issues                              |       | 71         | 196 |
| Activities                                              |       | 94         | 577 |
| Ethos and approach                                      |       | 92         | 556 |
| Stability and reliability of provision                  |       | 14         | 23  |
| Anxiety and fear of unknown                             |       | 65         | 321 |
| Transport and geography                                 |       | 39         | 87  |
| Venue issues                                            |       | 60         | 203 |
| Attendee characteristics                                |       | 62         | 216 |
| Difficulty becoming a member                            |       | 23         | 50  |
| Visibility and marketing                                |       | 76         | 365 |
| Place in the community                                  |       | 67         | 295 |
| Relationships with other organisations                  |       | 71         | 567 |
| Funding issues                                          |       | 64         | 327 |
| Cost effectiveness issues                               |       | 35         | 68  |

**“How it’s run”**

**Barriers to engagement**

**Networking & marketing**

**Money & resources**

## Supplementary file 2: Search strategy

### Databases:

EBSCOhost: **Academic Search Complete, CINAHL, MEDLINE, PsychINFO**

Other health and social care databases: **AMED, Embase, PubMed, Social Care Online**

Interdisciplinary databases: **ProQuest, Scopus**

Systematic reviews: **Cochrane Library, Campbell Collaboration**

Other/general: **Google Scholar**

**Limiters:** Published 1990 to present

| Key terms                            | String of related terms                                                                                                              |
|--------------------------------------|--------------------------------------------------------------------------------------------------------------------------------------|
| <b>Dementia</b>                      | Dementia                                                                                                                             |
| <b>Community</b>                     | Commun* OR Local* OR Social*                                                                                                         |
| <b>Intervention</b>                  | Intervention OR Program* OR Project OR Initiative OR Scheme OR Service OR Activit* OR Group OR Club OR Network OR Meeting OR Therapy |
| <b>Sustainability</b>                | Sustain* OR Maint* OR Manag* OR Facilitat* OR Barrier*                                                                               |
| <b>Implementation and Engagement</b> | Implement* OR Recruit* OR Engag*                                                                                                     |

Dementia AND (Commun\* OR Local\* OR Social\*) AND (Intervention OR Program\* OR Project OR Initiative OR Scheme OR Service OR Activit\* OR Group OR Club OR Network OR Meeting OR Therapy) AND (Sustain\* OR Maint\* OR Manag\* OR Facilitat\* OR Barrier\*) AND (Implement\* OR Recruit\* OR Engag\*)

### NOTES:

Search terms were kept uniform across all databases and searching was carried out by looking for the occurrence of these terms within the title, abstract and key words of documents in each database. If a database did not allow for this, the strategy was altered slightly to the closest option (e.g. in ProQuest this was searching everywhere in a document except full text; in PubMed this was by carrying out three separate searches by title content, by abstract content and key word content, then combining the results).

## Supplementary file 3: Inclusion and assessment criteria

### Inclusion and exclusion criteria for formal search:

| <b>Inclusion criteria</b><br>Types of intervention for inclusion should:                                                                                                                                                                                                                                                                                                                                                                                                                                                                                                                                                                                                                                                                                                                                                                                                                                                                                                                                                   | <b>Exclusion criteria</b><br>Interventions will be excluded if they:                                                                                                                                                                                                                                                                                                                                                                                                                                                                                                                                                                                                                                                                                                                                                                                                                                                                                                                                                                                       |
|----------------------------------------------------------------------------------------------------------------------------------------------------------------------------------------------------------------------------------------------------------------------------------------------------------------------------------------------------------------------------------------------------------------------------------------------------------------------------------------------------------------------------------------------------------------------------------------------------------------------------------------------------------------------------------------------------------------------------------------------------------------------------------------------------------------------------------------------------------------------------------------------------------------------------------------------------------------------------------------------------------------------------|------------------------------------------------------------------------------------------------------------------------------------------------------------------------------------------------------------------------------------------------------------------------------------------------------------------------------------------------------------------------------------------------------------------------------------------------------------------------------------------------------------------------------------------------------------------------------------------------------------------------------------------------------------------------------------------------------------------------------------------------------------------------------------------------------------------------------------------------------------------------------------------------------------------------------------------------------------------------------------------------------------------------------------------------------------|
| <ul style="list-style-type: none"> <li>• Target people with mild to moderate dementia (whether exclusively or among others without dementia, but either way there is dementia-specific support)</li> <li>• Serve people living in the community, whether in their own homes or in extra-care housing</li> <li>• Are voluntary attendance (i.e. members have chosen to attend, not been told they must as part of treatment or respite care)</li> <li>• Are social and place-based (bringing people together physically) in a community setting (open to members of the public to attend)</li> <li>• Are designed as an intervention with meaningful activity aiming to improve quality of life for people with dementia and family carers, or to help them manage or lessen the challenging effects dementia</li> <li>• Meet at regular, pre-fixed times, at least weekly and for a substantial amount of time (i.e. a morning or afternoon)</li> <li>• Meet continuously, on an ongoing basis, or aim to do so</li> </ul> | <ul style="list-style-type: none"> <li>• Are only for those with severe dementia</li> <li>• Do not target, and have no plan to cater for, people with dementia</li> <li>• Are only for care home residents, hospital patients or those in a closed institutional setting</li> <li>• Are an online or at-a-distance networking scheme that does not involve meeting physically</li> <li>• Only involve individual participants alone (e.g. occupational therapy, counselling or medical)</li> <li>• Are only functional meetings solely for the purpose of administering medical treatment or carry out case management</li> <li>• Are focussed mainly upon respite for carers or nursing care only (i.e. not focussed upon social, meaningful and quality-of-life-raising activities for those attending)</li> <li>• Only take place monthly; or for a very short duration (e.g. one hour); or intermittently with no specified or timetabled meetings</li> <li>• Are fixed-term courses with a time/goal/session limit (e.g. an 8 week course)</li> </ul> |

### Relevance and rigour assessment guidance:

| <b>Relevance</b>                                                                                                                                                                                                                                       | <b>Rigour</b>                                                                                                                                                                                                                                                                                                                                                                                                                                                                                            |
|--------------------------------------------------------------------------------------------------------------------------------------------------------------------------------------------------------------------------------------------------------|----------------------------------------------------------------------------------------------------------------------------------------------------------------------------------------------------------------------------------------------------------------------------------------------------------------------------------------------------------------------------------------------------------------------------------------------------------------------------------------------------------|
| <p>An article should comply with the inclusion/exclusion criteria in the first instance, except where agreed by the team for inclusion for a specific reason e.g. containing data that is broadly transferable and of use to the programme theory.</p> | <p>This is an assessment of the likely validity and reliability only of the <i>relevant</i> data contained in an article, <i>not</i> an assessment of the rigour of a study or intervention programme as a whole. Useful questions might include: <i>Is this data likely to be biased? Is it dealt with critically? Is it from a real-world example or theoretical speculation? Was the data gathered in some depth over time or in a quick "snapshot"? Is it safe to generalise from this data?</i></p> |

| Reasons for rating must be recorded. For example:                                                                                                                                                                                                                                                                                                                                                                                                                                                                                            | Reasons for rating must be recorded. For example:                                                                                                                                                                                                                                                                                                                                                                                                                                                                                                                                                                                                                                                                                                      |
|----------------------------------------------------------------------------------------------------------------------------------------------------------------------------------------------------------------------------------------------------------------------------------------------------------------------------------------------------------------------------------------------------------------------------------------------------------------------------------------------------------------------------------------------|--------------------------------------------------------------------------------------------------------------------------------------------------------------------------------------------------------------------------------------------------------------------------------------------------------------------------------------------------------------------------------------------------------------------------------------------------------------------------------------------------------------------------------------------------------------------------------------------------------------------------------------------------------------------------------------------------------------------------------------------------------|
| <p>A <b>low rating</b> might mean the article only contains a few relevant lines, with the bulk of the text focused on other, non-relevant matters</p> <p>A <b>medium rating</b> might mean an article has a lot of detail on one relevant issue (e.g. engaging people and keeping them engaged) which is pertinent to sustainability, but otherwise little on other important factors</p> <p>A <b>high rating</b> will mean an article has a direct focus on keeping an intervention sustainable long term, with a good level of detail</p> | <p>A <b>low rating</b> might mean data appears uncritically treated and at a high risk of bias (e.g. from a promotional article for a service) or simply descriptive and superficial in its reporting of basic facts from an intervention programme (e.g. from a short news article)</p> <p>A <b>medium rating</b> might mean data appears with some attempt at critical evaluation and is from a real-world example, but is limited in scope and generalisability, or in depth and detail</p> <p>A <b>high rating</b> might mean data is of good depth and detail and is from a critical evaluation of at least one real world example, gathered over a sustained period using range of robust measures and an appropriate sample of participants</p> |

## Supplementary file 4: Full lists of included articles

| Author(s)                                                                                                | Year | Article title                                                                                                                                     | Type of intervention                                                                                            | Country of origin                                                  | Type of article/study           | Publication                                          | Reference list No. |
|----------------------------------------------------------------------------------------------------------|------|---------------------------------------------------------------------------------------------------------------------------------------------------|-----------------------------------------------------------------------------------------------------------------|--------------------------------------------------------------------|---------------------------------|------------------------------------------------------|--------------------|
| Actifcare                                                                                                | 2017 | Best practice recommendations from the Actifcare study: Access to community care services for home-dwelling people with dementia and their carers | <b>community care services</b> in general                                                                       | Netherlands, Germany, Sweden, UK, Norway, Ireland, Portugal, Italy | Recommendations report          | www.actifcare.eu                                     | <b>36</b>          |
| Alzheimer's Australia                                                                                    | 2014 | The benefits of physical activity and exercise for people living with dementia (Discussion paper 11)                                              | <b>Exercise activities</b>                                                                                      | Australia                                                          | Report                          | Alzheimer's Australia                                | <b>69</b>          |
| Arkin                                                                                                    | 1999 | Elder rehab: A student-supervised exercise program for Alzheimer's patients                                                                       | <b>Weekly exercise programme</b> pairing elders and student helpers at a college gym (caregivers also involved) | US                                                                 | Journal paper - programme pilot | The Gerontologist                                    | <b>92</b>          |
| Arthur, Buckner, Buswell, Darlington, Killett, Lafortune, Mathie, Mayrhofer, Skedgel, Woodward & Goodman | 2020 | DEMCOM: National Evaluation of Dementia Friendly Communities (Executive Summary)                                                                  | <b>Dementia Friendly Communities - various social and leisure activities</b>                                    | UK                                                                 | Evaluation report               | Applied Research Collaboration (ARC) East of England | <b>90</b>          |

1  
2  
3  
4  
5  
6  
7  
8  
9  
10  
11  
12  
13  
14  
15  
16  
17  
18  
19  
20  
21  
22  
23  
24  
25  
26  
27  
28  
29  
30  
31  
32  
33  
34  
35  
36  
37  
38  
39  
40  
41  
42  
43  
44  
45  
46

|                                      |      |                                                                                                                       |                                       |                                |                                                 |                                                            |           |
|--------------------------------------|------|-----------------------------------------------------------------------------------------------------------------------|---------------------------------------|--------------------------------|-------------------------------------------------|------------------------------------------------------------|-----------|
| Bould, McFadyen & Thomas             | 2019 | Dementia-friendly sport and physical activity guide                                                                   | <b>Sport and exercise initiatives</b> | UK                             | Information booklet                             | Alzheimer's Society                                        | <b>48</b> |
| Brataas, Bjugan, Wille & Hellzen     | 2010 | Experiences of day care and collaboration among people with mild dementia                                             | <b>Day care</b>                       | Norway                         | Journal paper - qual study of a trial programme | Journal of Clinical Nursing                                | <b>65</b> |
| Brooker, Evans, Evans, Watts & Drees | 2017 | Meeting Centres Support Programme UK: Overview, evidence and getting started                                          | <b>Meeting Centres</b>                | Netherlands, Italy, Poland, UK | Information/guide booklet                       | Association for Dementia Studies (University of Worcester) | <b>42</b> |
| Cahill, Pierce & Bobersky            | 2014 | An evaluation report on flexible respite options of the Living Well With Dementia project in Stillorgan and Blackrock | <b>Day care/respite</b>               | Ireland                        | Evaluation report                               | Trinity College Dublin                                     | <b>57</b> |

|                                                                                                                            |                                                                                                                     |      |                                                                                                                                        |                                           |    |                                     |                                       |           |
|----------------------------------------------------------------------------------------------------------------------------|---------------------------------------------------------------------------------------------------------------------|------|----------------------------------------------------------------------------------------------------------------------------------------|-------------------------------------------|----|-------------------------------------|---------------------------------------|-----------|
| 1<br>2<br>3<br>4<br>5<br>6<br>7<br>8<br>9                                                                                  | Carone, Tischler & Dening                                                                                           | 2016 | Football and dementia: A qualitative investigation of a community based sports group for men with early onset dementia                 | <b>Sport and exercise group</b>           | UK | Journal paper - qualitative study   | Dementia                              | <b>58</b> |
| 10<br>11<br>12<br>13<br>14<br>15<br>16<br>17                                                                               | Casey                                                                                                               | 2004 | Early onset dementia: Getting out and about                                                                                            | <b>Small "out and about" social group</b> | UK | Specialist news article             | Journal of Dementia Care              | <b>66</b> |
| 18<br>19<br>20<br>21<br>22<br>23<br>24<br>25                                                                               | Clarke, Keyes, Wilkinson, Alexjuk, Wilcockson, Robinson, Corner & Cattan                                            | 2014 | Organisational space for partnership and sustainability: lessons from the implementation of the National Dementia Strategy for England | <b>Peer support networks</b>              | UK | Journal paper - strategy evaluation | Health & Social Care in the Community | <b>51</b> |
| 26<br>27<br>28<br>29<br>30<br>31<br>32<br>33<br>34<br>35<br>36<br>37<br>38<br>39<br>40<br>41<br>42<br>43<br>44<br>45<br>46 | Daykin, Julier, Tomlinson, Meads, Mansfield, Payne, Duffy, Lane, D'Innocenzo, Burnett, Kay, Dolan, Testoni & Victor | 2016 | Review of the grey literature: music, singing and wellbeing                                                                            | <b>Singing and musical activities</b>     | UK | Review/Report                       | What Works Wellbeing report           | <b>37</b> |



|                                                                                                                            |                                                       |      |                                                                                                               |                                               |       |                                      |                                   |           |
|----------------------------------------------------------------------------------------------------------------------------|-------------------------------------------------------|------|---------------------------------------------------------------------------------------------------------------|-----------------------------------------------|-------|--------------------------------------|-----------------------------------|-----------|
| 1<br>2<br>3<br>4<br>5<br>6<br>7<br>8<br>9                                                                                  | Dean, Silversides, Crampton & Wrigley                 | 2015 | Evaluation of the Bradford Dementia Friendly Communities Programme                                            | <b>Activities and groups in the community</b> | UK    | Evaluation report                    | Joseph Rowntree Foundation report | <b>76</b> |
| 10<br>11<br>12<br>13<br>14<br>15<br>16<br>17                                                                               | Dean, Silversides, Crampton & Wrigley                 | 2015 | Evaluation of the York Dementia Friendly Communities Programme                                                | <b>Activities and groups in the community</b> | UK    | Evaluation report                    | Joseph Rowntree Foundation report | <b>77</b> |
| 18<br>19<br>20<br>21<br>22<br>23<br>24<br>25                                                                               | Gajardo, Aravena, Budinich, Larrain, Fuentes & Gitlin | 2017 | The Kintun program for families with dementia: From novel experiment to national policy (innovative practice) | <b>Day centre and dementia community hub</b>  | Chile | Journal article - program evaluation | Dementia                          | <b>59</b> |
| 26<br>27<br>28<br>29<br>30<br>31<br>32<br>33<br>34<br>35<br>36<br>37<br>38<br>39<br>40<br>41<br>42<br>43<br>44<br>45<br>46 | Glover                                                | 2014 | Running self-help groups in sheltered and extra care accommodation for people who live with dementia          | <b>Self-help social and activity groups</b>   | UK    | Information/guide booklet            | Mental Health Foundation          | <b>43</b> |

|                                                     |      |                                                                                                           |                                                                              |           |                                    |                                                           |           |
|-----------------------------------------------------|------|-----------------------------------------------------------------------------------------------------------|------------------------------------------------------------------------------|-----------|------------------------------------|-----------------------------------------------------------|-----------|
| Gottlieb-Tanaka                                     | 2006 | Creative expression, dementia and the therapeutic environment                                             | <b>Art/creative activities in a day centre environment</b>                   | Canada    | Dissertation/Thesis                |                                                           | <b>63</b> |
| Green & Lakey (Alzheimer's Society)                 | 2013 | Building dementia-friendly communities: a priority for everyone                                           | <b>Dementia Friendly Communities</b> - various social and leisure activities | UK        | Report                             | Alzheimer's Society                                       | <b>49</b> |
| Grinberg, Lagunoff, Phillips, Stern, Goodman & Chow | 2007 | Multidisciplinary design and implementation of a day program specialized for the frontotemporal dementias | <b>Day program</b> for people with FTD                                       | Canada    | Journal paper - program evaluation | American Journal of Alzheimer's Disease & Other Dementias | <b>60</b> |
| Hayes & Williamson                                  | 2007 | Men's Sheds: Exploring the Evidence for Best Practice                                                     | <b>Men's Sheds</b>                                                           | Australia | Evaluation report                  | School of Public Health, La Trobe University              | <b>70</b> |

1  
2  
3  
4  
5  
6  
7  
8  
9  
10  
11  
12  
13  
14  
15  
16  
17  
18  
19  
20  
21  
22  
23  
24  
25  
26  
27  
28  
29  
30  
31  
32  
33  
34  
35  
36  
37  
38  
39  
40  
41  
42  
43  
44  
45  
46

|                                                                                                               |      |                                                                                                                    |                                                      |       |                                    |                                        |           |
|---------------------------------------------------------------------------------------------------------------|------|--------------------------------------------------------------------------------------------------------------------|------------------------------------------------------|-------|------------------------------------|----------------------------------------|-----------|
| Health Innovation Network South London** (**see also linked films within document plus 2015 HIN Case Studies) | 2015 | Peer Support for People with Dementia Resource Pack                                                                | A range of <b>peer support groups and activities</b> | UK    | Information/guide booklet          | Health Innovation Network South London | <b>80</b> |
| Health Innovation Network South London                                                                        | 2015 | Case Study: Dulwich Helpline and Southwark Churches Care (DH&SCC) – The Dementia Project, Southwark, South London. | <b>Peer support project</b>                          | UK    | Information/guide booklet          | Health Innovation Network South London | <b>52</b> |
| Health Innovation Network South London                                                                        | 2015 | Case Study: The Healthy Living Club (HLC) – A self-directed, dementia-centred community group in Stockwell, London | <b>Peer support group</b>                            | UK    | Information/guide booklet          | Health Innovation Network South London | <b>85</b> |
| Hikichi, Kondo, Takeda & Kawachi                                                                              | 2017 | Social interaction and cognitive decline: Results of a 7-year community intervention                               | <b>Community centres for older people</b>            | Japan | Journal paper - longitudinal study | Alzheimer's & Dementia                 | <b>81</b> |

|                                                                            |      |                                                                                                                                                                  |                                                                      |         |                                                    |                                     |           |
|----------------------------------------------------------------------------|------|------------------------------------------------------------------------------------------------------------------------------------------------------------------|----------------------------------------------------------------------|---------|----------------------------------------------------|-------------------------------------|-----------|
| Hochgraeber, Bartholomeyczik & Holle** (**See also Hochgraeber et al 2017) | 2012 | Low-threshold support for families with dementia in Germany                                                                                                      | <b>"Low threshold" support services including social care groups</b> | Germany | Journal paper - survey protocol                    | BMC Research Notes                  | <b>82</b> |
| Hochgraeber, Von Kutzleben, Bartholomeyczik & Holle                        | 2017 | Low-threshold support services for people with dementia within the scope of respite care in Germany – A qualitative study on different stakeholders' perspective | <b>"Low threshold" support services including social care groups</b> | Germany | Journal paper - qualitative study                  | Dementia                            | <b>38</b> |
| Jackson                                                                    | 2017 | The Debenham Project: Project Blog and Catch-Up                                                                                                                  | <b>Range of local support groups and activities</b>                  | UK      | Project blog newsletter/report                     | Debenham Project                    | <b>87</b> |
| Kelsey & Laditka                                                           | 2005 | Evaluating best practices for social model programs for adults with Alzheimer's disease in South Carolina                                                        | <b>"Social model" day care</b>                                       | US      | Journal paper - review and survey of best practice | Home Health Care Services Quarterly | <b>91</b> |

|                                                                |      |                                                                                                                                                                                   |                                                                             |    |                                                |                                                           |           |
|----------------------------------------------------------------|------|-----------------------------------------------------------------------------------------------------------------------------------------------------------------------------------|-----------------------------------------------------------------------------|----|------------------------------------------------|-----------------------------------------------------------|-----------|
| La Rue, Felten, Duschene, MacFarlane, Price, Zimmerman & Havez | 2013 | Language-enriched exercise plus socialization for older adults with dementia: Translation to rural communities                                                                    | <b>Language, exercise and socialisation program</b>                         | US | Journal paper - trial program in rural setting | Seminars in Speech and Language                           | <b>83</b> |
| La Rue, Felten & Turkstra                                      | 2015 | Intervention of Multi-Modal Activities for Older Adults With Dementia Translation to Rural Communities                                                                            | <b>Language, exercise and socialisation program</b>                         | US | Journal paper - trial program in rural setting | American Journal of Alzheimer's Disease & Other Dementias | <b>53</b> |
| LeBlanc                                                        | 2010 | Integrating behavioral psychology services into adult day programming for individuals with dementia                                                                               | <b>Day care (for people with dementia exhibiting challenging behaviour)</b> | US | Journal paper - program evaluation             | Behavior Modification                                     | <b>93</b> |
| Lockwood                                                       | 2012 | The Debenham Project: A case study of a unique community-led and owned project dedicated to the support of carers of those that have symptoms of dementia and those they care for | <b>Range of local support groups and activities</b>                         | UK | Case study report                              | Community Catalysts                                       | <b>84</b> |

|                                                                   |                                                                                                                                         |      |                                                                                                                             |                                                                                         |                                |                                    |                                     |           |
|-------------------------------------------------------------------|-----------------------------------------------------------------------------------------------------------------------------------------|------|-----------------------------------------------------------------------------------------------------------------------------|-----------------------------------------------------------------------------------------|--------------------------------|------------------------------------|-------------------------------------|-----------|
| 1<br>2<br>3<br>4<br>5<br>6<br>7<br>8<br>9<br>10<br>11<br>12<br>13 | Mangiaracina, Chattat, Farina, Saibene, Gamberini, Brooker, Evans, Evans, Szcześniak, Urbanska, Rymaszewska, Hendricks, Dröes & Meiland | 2017 | Not re-inventing the wheel: the adaptive implementation of the meeting centres support programme in four European countries | <b>Meeting Centres</b>                                                                  | Netherlands, Italy, Poland, UK | Journal paper - project evaluation | Aging & Mental Health               | <b>86</b> |
| 14<br>15<br>16<br>17<br>18<br>19<br>20                            | Mapes, Milton, Nicholls & Williamson (Natural England)                                                                                  | 2016 | Is it nice outside? Consulting people living with dementia and their carers about engaging with the natural environment     | <b>Outdoor activities</b>                                                               | UK                             | Report                             | Natural England report              | <b>64</b> |
| 21<br>22<br>23<br>24<br>25<br>26<br>27                            | Marshall & Jackson                                                                                                                      | 2015 | Encouraging and supporting the growth of "dementia proactive communities"                                                   | <b>Dementia proactive communities</b><br>(Range of local support groups and activities) | UK                             | Report                             | Debenham Project & Sue Ryder        | <b>50</b> |
| 28<br>29<br>30<br>31<br>32<br>33<br>34<br>35<br>36                | Mason & Slack                                                                                                                           | 2013 | The Debenham Project: Research into the dementia/memory loss journey for cared-for and carer, 2012-13                       | Range of local support groups and activities                                            | UK                             | Evaluation report - survey         | Norfolk & Suffolk Dementia Alliance | <b>54</b> |

37  
38  
39  
40  
41  
42  
43  
44  
45  
46

1  
2  
3  
4  
5  
6  
7  
8  
9  
10  
11  
12  
13  
14  
15  
16  
17  
18  
19  
20  
21  
22  
23  
24  
25  
26  
27  
28  
29  
30  
31  
32  
33  
34  
35  
36  
37  
38  
39  
40  
41  
42  
43  
44  
45  
46

|                                            |      |                                                                                                                                              |                                                                                            |             |                                                            |                                                             |           |
|--------------------------------------------|------|----------------------------------------------------------------------------------------------------------------------------------------------|--------------------------------------------------------------------------------------------|-------------|------------------------------------------------------------|-------------------------------------------------------------|-----------|
| McAiney, Hillier, Stolee, Harvey & Michael | 2012 | 'Throwing a lifeline': the role of First Link in enhancing support for individuals with dementia and their caregivers                        | Information on and links between <b>support services (including groups and activities)</b> | Canada      | Journal paper - evaluation                                 | Neurodegenerative Disease Management (Future Medicine)      | <b>88</b> |
| McDonald & Heath                           | 2009 | Developing services for people with dementia                                                                                                 | <b>General dementia support services</b> in rural areas                                    | UK          | Journal short report feature - review of service provision | Working with Older People: Community Care Policy & Practice | <b>39</b> |
| The Me Myself and I Club                   | 2018 | The Me, Myself and I Club, Briton Ferry: A case study in warm humanity and meaningful co-production                                          | <b>Friendship club and support services</b>                                                | UK (Wales)  | Programme/service report                                   | Me Myself and I Club                                        | <b>46</b> |
| Meiland, Dröes, De Lang & Vernooij-Dassen  | 2004 | Development of a theoretical model for tracing facilitators and barriers in adaptive implementation of innovative practices in dementia care | <b>Meeting centres</b>                                                                     | Netherlands | Journal paper - model development                          | Archives Of Gerontology And Geriatrics Supplement           | <b>55</b> |



|                                           |      |                                                                                                                        |                            |             |                                              |                                 |           |
|-------------------------------------------|------|------------------------------------------------------------------------------------------------------------------------|----------------------------|-------------|----------------------------------------------|---------------------------------|-----------|
| Meiland, Dröes, De Lang & Vernooij-Dassen | 2005 | Facilitators and barriers in the implementation of the Meeting Centres model for people with dementia and their carers | <b>Meeting centres</b>     | Netherlands | Journal paper - model test                   | Health Policy                   | <b>61</b> |
| The Mental Health Foundation              | 2018 | An evaluation of the Standing Together project                                                                         | <b>Peer support groups</b> | UK          | Evaluation report                            | Mental Health Foundation report | <b>73</b> |
| Milligan, Payne, Bingley & Cockshott      | 2015 | Place and wellbeing: shedding light on activity interventions for older men                                            | <b>Men's Sheds</b>         | UK          | Journal paper - qualitative study of program | Ageing & Society                | <b>71</b> |
| Moore                                     | 2002 | Observed affect in a dementia day center: Does the physical setting matter?                                            | <b>Day centre</b>          | US          | Journal paper - case study/field observation | Alzheimer's Care Quarterly      | <b>89</b> |

1  
2  
3  
4  
5  
6  
7  
8  
9  
10  
11  
12  
13  
14  
15  
16  
17  
18  
19  
20  
21  
22  
23  
24  
25  
26  
27  
28  
29  
30  
31  
32  
33  
34  
35  
36  
37  
38  
39  
40  
41  
42  
43  
44  
45  
46

|                                       |      |                                                                                                                                                                            |                                                             |            |                     |                                              |           |
|---------------------------------------|------|----------------------------------------------------------------------------------------------------------------------------------------------------------------------------|-------------------------------------------------------------|------------|---------------------|----------------------------------------------|-----------|
| Noimuenwai                            | 2012 | Effectiveness of adult day care programs on health outcomes of Thai family caregivers of persons with dementia                                                             | <b>Day care (Thailand)</b>                                  | Thailand   | Dissertation/Thesis |                                              | <b>78</b> |
| NVCO                                  | 2019 | How To Fundraise In Tough Times                                                                                                                                            | <b>Third sector and non-profit organisations in general</b> | UK         | Information guide   | NCVO Knowhow website                         | <b>94</b> |
| Older People's Commissioner for Wales | 2018 | Rethinking respite for people affected by dementia                                                                                                                         | <b>Respite/day services</b>                                 | UK (Wales) | Report              | Older People's Commissioner for Wales report | <b>47</b> |
| Oliver-Watkins, Kendall & Matthews    | 2016 | Sow & Grow: Report from a two-year Social and Therapeutic Horticultural (STH) programme delivering table-top gardening courses to adults in the community aged 50 and over | <b>Gardening groups</b>                                     | UK         | Evaluation report   | Sow & Grow                                   | <b>67</b> |

|                                                    |      |                                                                                                                                         |                                                                                 |         |                                       |                                    |           |
|----------------------------------------------------|------|-----------------------------------------------------------------------------------------------------------------------------------------|---------------------------------------------------------------------------------|---------|---------------------------------------|------------------------------------|-----------|
| Reichet & Wolter                                   | 2017 | Implementing physical activity programs for people with dementia: Results from a German study                                           | <b>Sports club initiatives</b>                                                  | Germany | Poster presentation                   |                                    | <b>44</b> |
| Reichet & Wolter                                   | 2017 | Implementing physical activity programs for people with dementia: Results from a German study                                           | <b>Sports club initiatives</b>                                                  | Germany | Conference abstract                   | Innovation in Aging (Supplement)   | <b>45</b> |
| Rio                                                | 2018 | A Community-Based Music Therapy Support Group for People With Alzheimer's Disease and Their Caregivers: A Sustainable Partnership Model | <b>Music therapy group</b>                                                      | US      | Journal paper - program evaluation    | Frontiers In Medicine              | <b>62</b> |
| Shnall, Agate, Grinberg, Huijbregts, Nguyen & Chow | 2013 | Development of supportive services for frontotemporal dementias through community engagement                                            | <b>Day program for FTD</b> (plus online groups and resources for family carers) | Canada  | Journal paper - review of initiatives | International Review of Psychiatry | <b>96</b> |

|                            |      |                                                                                                                                                             |                                                         |        |                                            |                                                |           |
|----------------------------|------|-------------------------------------------------------------------------------------------------------------------------------------------------------------|---------------------------------------------------------|--------|--------------------------------------------|------------------------------------------------|-----------|
| Solutions Research         | 2016 | Public perceptions and experiences of community-based end of life care initiatives: a qualitative research report                                           | <b>Community-based support initiatives</b> of all kinds | UK     | Report                                     | Public Health England report                   | <b>56</b> |
| Strandenæs, Lund & Rokstad | 2018 | Experiences of attending day care services designed for people with dementia - a qualitative study with individual interviews                               | <b>Day care</b>                                         | Norway | Journal paper - qualitative study          | Aging & Mental Health                          | <b>40</b> |
| Thrive                     | 2012 | Growing4life - A Thrive Community Gardening Project: A practical guide to setting up a community gardening project for people affected by mental ill health | <b>Gardening groups</b>                                 | UK     | Information/guide booklet                  | Thrive (The Society for Horticultural Therapy) | <b>74</b> |
| Tuppen                     | 2012 | The benefits of groups that provide cognitive stimulation for people with dementia                                                                          | <b>Cognitive stimulation clubs</b>                      | UK     | Journal article - overview of intervention | Nursing Older People                           | <b>72</b> |

|                                                                                                                               |      |                                                                                                                                                                                    |                                    |                                |                                         |                                                    |           |
|-------------------------------------------------------------------------------------------------------------------------------|------|------------------------------------------------------------------------------------------------------------------------------------------------------------------------------------|------------------------------------|--------------------------------|-----------------------------------------|----------------------------------------------------|-----------|
| Tuppen & Jones                                                                                                                | 2015 | Cogs Clubs: a helpful activity in early dementia                                                                                                                                   | <b>Cognitive stimulation clubs</b> | UK                             | Specialist news article                 | Journal of Dementia Care                           | <b>75</b> |
| Van Haeften-van Dijk, Meiland, van Mierlo & Dröes                                                                             | 2015 | Transforming nursing home-based day care for people with dementia into socially integrated community day care: Process analysis of the transition of six day care centres          | <b>Meeting centres</b>             | Netherlands                    | Journal paper - process evaluation      | International Journal of Nursing Studies           | <b>79</b> |
| Van Mierlo, Chattat, Evans, Brooker, Saibene, Gamberini, Farina, Scorolli, Szcześniak, Urbańska, Rymaszewska, Dröes & Meiland | 2018 | Facilitators and barriers to adaptive implementation of the Meeting Centers Support Program (MCSP) in three European countries; the process evaluation within the MEETINGDEM study | <b>Meeting centres</b>             | Netherlands, Italy, Poland, UK | Journal paper - program evaluation      | International Psychogeriatrics                     | <b>41</b> |
| Williams & Roberts                                                                                                            | 1995 | Friends in passing: social interaction at an adult day care center                                                                                                                 | <b>Adult day care centre</b>       | US                             | Journal paper - participant observation | International Journal Of Aging & Human Development | <b>68</b> |

1  
2  
3  
4  
5  
6  
7  
8  
9  
10  
11  
12  
13  
14  
15  
16  
17  
18  
19  
20  
21  
22  
23  
24  
25  
26  
27  
28  
29  
30  
31  
32  
33  
34  
35  
36  
37  
38  
39  
40  
41  
42  
43  
44  
45  
46

|                                                                                             |      |                                                                                |                            |        |                               |                 |           |
|---------------------------------------------------------------------------------------------|------|--------------------------------------------------------------------------------|----------------------------|--------|-------------------------------|-----------------|-----------|
| Wimo, Wallin, Lundgren, Ronnback, Asplund, Mattsson & Krakau (see also Clarkson et al 2017) | 1990 | Impact of Day Care on Dementia Patients—Costs, Well-being and Relatives' Views | <b>Specialist day care</b> | Sweden | Journal paper - cost analysis | Family Practice | <b>95</b> |
|---------------------------------------------------------------------------------------------|------|--------------------------------------------------------------------------------|----------------------------|--------|-------------------------------|-----------------|-----------|

For peer review only









1  
2  
3  
4  
5  
6  
7  
8  
9  
10  
11  
12  
13  
14  
15  
16  
17  
18  
19  
20  
21  
22  
23  
24  
25  
26  
27  
28  
29  
30  
31  
32  
33  
34  
35  
36  
37  
38  
39  
40  
41  
42  
43  
44  
45  
46





1  
2  
3  
4  
5  
6  
7  
8  
9  
10  
11  
12  
13  
14  
15  
16  
17  
18  
19  
20  
21  
22  
23  
24  
25  
26  
27  
28  
29  
30  
31  
32  
33  
34  
35  
36  
37  
38  
39  
40  
41  
42  
43  
44  
45  
46





1  
2  
3  
4  
5  
6  
7  
8  
9  
10  
11  
12  
13  
14  
15  
16  
17  
18  
19  
20  
21  
22  
23  
24  
25  
26  
27  
28  
29  
30  
31  
32  
33  
34  
35  
36  
37  
38  
39  
40  
41  
42  
43  
44  
45  
46



1  
2  
3  
4  
5  
6  
7  
8  
9  
10  
11  
12  
13  
14  
15  
16  
17  
18  
19  
20  
21  
22  
23  
24  
25  
26  
27  
28  
29  
30  
31  
32  
33  
34  
35  
36  
37  
38  
39  
40  
41  
42  
43  
44  
45  
46





## Supplementary file 6: Full list of CMOCs

### Getting Members

CMOC 1: If the social aspect of an intervention is emphasised (C), then a wider range of people are likely to be interested (O), as a desire for social connection and activity is more universal than interest in a niche and potentially intimidating activity (M). [40,48,50,57,58,62,64,75]

CMOC 2: If food is offered (C), then people are more likely to attend (O), because the enjoyment of good food is universal and communal eating is associated with comfort, relaxation and social connection (M). [40,59]

CMOC 3: If facilitators are knowledgeable and empathetic, with good interpersonal skills (C), an initiative will be perceived as more welcoming and inclusive (O), as they will be better at understanding needs, engaging and building trust with potential members and their families (M). [36,37,38,39,40,41]

CMOC 4: If an initiative has an informal, unrushed and warm welcome on first visit (C), then people are more likely to want to return (O), as they are more likely to find the experience relaxing and enjoyable, not uncomfortable and intimidating (M). [40,42,43,44,45]

CMOC 5: If potential members have had poor previous experiences with groups or activities (dementia related or not) (C), they may not want to try another group or activity (O), because they think the experience will be similar and will want to avoid it (M). [37,41,46,47]

CMOC 6: If time is taken for personal contact, home visits or taster sessions with potential members (C), then people are more likely to come (O), as they will feel more familiar with the initiative and more trusting of those running it (M). [36,38,47,48,49,50]

CMOC 7: If an initiative is familiar and trusted, or local and well integrated with other organisations in the community (C), then people are more likely to come (O), as its links to familiar things that they trust will make it less intimidating (M). [37,41,42,48,51,52,53,54,55,56]

CMOC 8: If an intervention is based in familiar surroundings in, and open to, the community (C), then people are more likely to come (O), because potential members will find the normalcy, lack of stigma and chance for social integration appealing (M). [38,41,48,52,57,58,59,60,61,62]

CMOC 9: If a venue is dementia-friendly, comfortable and accessible (C), people are more likely to come (O), as they will not have concerns about comfort or access (M). [48,55,63,64]

CMOC 10: If an intervention is recommended by trusted family members and health professionals (C) people are more likely to go (O), as they will trust their judgement that it will be of benefit to them (M). [54,65]

CMOC 11: If discussion/training is held with families, carers and health professionals about their attitudes and beliefs towards dementia (C), they may be more likely to successfully encourage the person they care for to try an intervention (O), because they will understand dementia and be better able to overcome stigma and emotional barriers (M). [36,54,56,65]

CMOC 12: If evidence of an intervention's therapeutic benefits is made clear to families and care partners (C), then people are more likely to attend (O) as families and care partners will have confidence in the intervention so be more likely to encourage them to go (M). [38,41,75,78]

CMOC 13: If there is support for family/care partners alongside the intervention (C) then people are more likely to attend (O), as family and care partners will feel more able and inclined to attend themselves and encourage those they care for (M). [42,48,56,58,76,77,79]

CMOC 14: If an initiative is in a close-knit community with where there is stigma about dementia (C), then people and their families may be put off coming (O), as they may be concerned about confidentiality and word of their condition (or that of their family member) getting out (M). [47,56,62,73]

CMOC 15: If an initiative provides enjoyable, meaningful activities (C), then this is likely to attract members (O), as doing them will provide a reason and motive for many to attend initially, even if they stay on for other benefits (M). [41,44,45,50,64,67,70,71,72,83]

CMOC 16: If an initiative provides normalised, mainstream activities (C), then they are likely to attract members (O), as they will have resonance with people's previous interests, experience and history that would like to continue in some form (M). [46,48,57,58,65,67,71,81]

CMOC 17: If an initiative offers a range of different activities and services (C), then people are more likely to attend (O), as the initiative will appeal to a wider range of people with a range of needs (M). [47,48,62,84]

CMOC 18: If potential members' culture, ethnicity and language are acknowledged and catered for within the initiative (C), then they are more likely to come (O), as they will feel more comfortable and valued (M). [47,56,63,69,80]

CMOC 19: If there is a lack of diversity (of members and personnel) or pandering to stereotypes (C), then people may be put off coming (O), as they may have concerns about discrimination and stigma beyond dementia (M). [53,56,70,77]

CMOC 20: If the initiative is run by a religious organisation or in religious venue (C), then people may be put off coming (O), if they are not of that religion or cultural background (M). [56,82]

CMOC 21: If a group is too inclusive when not appropriate (C), this can alienate potential target members (O), as they will feel it will not be focussed on their specific needs (M). [37,60,62]

CMOC 22: If an initiative differentiates activities and roles for members by ability (C), then this can encourage potential members to attend (O), as they will feel there is an appropriate place for them rather than everyone being lumped in together (M). [48,79]

- 1  
2  
3 CMOC 23: If an intervention is risk averse or underestimates members' abilities and avoids challenge (C), then potential members will be  
4 put off (O), because they will see its activities as too easy, boring or not appropriate for them (M). [63,64,69,73]
- 5 CMOC 24: If an intervention is ability-focussed with tailored support and sensitive design of facilities (C), it is more likely to persuade  
6 potential members to attend (O) as they will be encouraged and supported to overcome physical impairments and negative attitudes (M).  
7 [43,58,62,64,69]
- 8 CMOC 25: When an intervention can offer practical advice, information and links to services that can help people (C), then it is more likely  
9 to attract members/service users (O), as they will be able to see that it has something to offer them that will meet their most immediate  
10 and pressing needs (M). [42,44,45,54,73,85]
- 11 CMOC 26: If safe, supported transfer from home to venue can be guaranteed (C), then people will be more likely to come (O), because  
12 they will be more likely to overcome any concerns about going out and getting to a group or activity session (M).  
13 [36,38,44,45,47,60,64,65,85,73]
- 14 CMOC 27: If the transport available isn't appropriate, reliable and respectful of people with dementia (C), then people will not come (O),  
15 as will not want to use that transport to get there (M). [37,47,49,64,76,77,82]
- 16 CMOC 28: If transport costs are significant and there is no financial support (C), then people will not come (O), as they will not be able to  
17 afford the transport costs (M). [36,38,56,59,64,76,78,82]
- 18 CMOC 29: If the venue is not in people's own neighbourhoods, is geographically distant or hard to reach (C) then people will not come (O),  
19 as they will find it difficult or intimidating to get there (M). [49,60,61,86]
- 20 CMOC 30: If an initiative forms links with community and public transport/taxi firms (C), then this will attract members (O), as they will  
21 find it less difficult or intimidating to travel to the venue (M). [48,76,77]
- 22 CMOC 31: If referrers are not made clearly aware of the added value, target population, ethos and activities of an intervention (C), then  
23 they will be less likely to refer appropriately (O), as they will not understand the value of it to their clients (M). [41,51,61,75,79]
- 24 CMOC 32: If there is constant contact and collaboration with potential referrers (C), then they are more likely to refer members (O), as  
25 they will build a relationship with the intervention that will mean they are better able to understand and remain alert to it (M).  
26 [46,51,54,55,74,75,79]
- 27 CMOC 33: If PR materials are not available in the right places or presented to people in the right circumstances (C), then they will not try  
28 an intervention (O), because they will not access those materials to find out about an intervention's potential value to them (M).  
29 [36,47,56,78,82]
- 30 CMOC 34: If PR materials are not in an understandable and appropriate format and tone (C), then people will not try an intervention (O),  
31 as they will find the materials too off-putting to engage with (M). [38,49,56,61,67,73,74,80]
- 32 CMOC 35: If PR materials do not make clear the specifics of an intervention, what to expect and how to attend (C), then people will be less  
33 likely to come (O), as they may be anxious due to uncertainties over what they will have to do and its value to them (M). [41,48,51,56,89]
- 34 CMOC 36: If an intervention has a stigma-free name that resonates with its target population (C), then people are more likely to come (O),  
35 as they will have confidence that they will be treated with respect and not suffer stigma when they go (M). [38,46,56,59,66,72]
- 36 CMOC 37: If the local community is fragmented with no local welfare organisation to distribute information (C), then people will be less  
37 likely to come (O), as it will be more difficult to get the word out to the right people in the community (M). [37,56,61]
- 38 CMOC 38: If an intervention forms links with existing groups, organisations and venues serving same demographic (C), then people will be  
39 more likely to come (O), as information and marketing materials will be more likely to reach them (M). [48,54,62,67,83]
- 40 CMOC 39: If all those involved in a person's care work together to collate and co-ordinate information (C), then people will be more likely  
41 to come (O) as information and marketing materials will reach them more efficiently (M). [36,61]
- 42 CMOC 40: If there is a dedicated linking, contact or health care adviser service (C) then people will be more likely to come (O) as  
43 information and marketing materials will reach them more efficiently (M). [36,38,44,45,47,56,75,80,88]
- 44 CMOC 41: If awareness of the needs of people dementia and of how an intervention can meet them is raised in the community in general  
45 (C), then people will be more likely to come (O), as stigma will be reduced and the value of the intervention communicated through word  
46 of mouth (M). [36,37,38,46,47,48,51,54,56,59,67,70,83,84,87]
- 47 CMOC 42: If GPs were given more incentive and guidance for social prescribing (C), then they would refer more people (O), because they  
48 would have a vested interest and confidence in doing so (M). [47,69]
- 49 CMOC 43: If there are significant bureaucratic problems with referring (such as chronic waiting lists, area border issues or the need for  
50 signed consent) (C), then professionals will be less likely to refer (O), as they will anticipate difficulties that will thwart their attempt to  
51 refer (M). [47,61,80,88]
- 52 CMOC 44: If GPs do not diagnose dementia until people are at later stages (C), then they will not refer people to community initiatives (O),  
53 as they will not see initiatives targeted towards those at earlier stages still able to live at home as appropriate for those they are  
54 diagnosing (M). [76,79]
- 55 CMOC 45: If an intervention waives the need for a diagnosis and accepts self-diagnosis (C), more people will come (O), as this will  
56 encourage a wider range of potential members and avoid excluding people who might benefit (M). [38,57,79,83]
- 57 CMOC 46: If an initiative's membership application process is not simple, clear, concise and easy (C), then people will not come (O), as the  
58 difficulty in applying will put them off joining (M). [38,44,45,74]
- 59  
60

## **Keeping Members**

CMOC 47: If there is group cohesion and mutual trust between members (C), then a group is more likely to sustain (O), because members will feel more solidarity and investment in the group (M). [65]

CMOC 48: If friendships between members are encouraged, recognised and supported by staff and activities (C), then people are likely to keep coming (O), as they will feel more supported, comfortable and engaged, and able to support each other (M). [43,54,66,67,68]

CMOC 49: If an intervention is too focussed on agendas, rules and expectations (C), then people may stop coming (O), because they feel pressured, restricted and unable to relax and enjoy the social and emotional benefits important to them (M). [44,45,63,67,69,70,71]

CMOC 50: If the pace of activity through the day/session is too fast and strict (C), then people may stop coming (O), because they will struggle to stay engaged and will not enjoy themselves (M). [43,48,57,61,72]

CMOC 51: If ample informal time is made for socialising, peer support and feedback (C), then members are more likely to keep coming (O), as they will be more likely to feel comfortable and supported (M). [40,43,48,50,58,62,65,67,69,70,71,72,73,74,75]

CMOC 52: If there is opportunity to have communal eating and relaxing in a “cozy” environment (C), then members are more likely to keep coming (O), as this will provide comfort and foster group cohesion. [40,65]

CMOC 53: If there is regular social integration with others outside of the group (C), then members are more likely to keep coming (O), as they will feel more connected and less stigmatised (M). [38,41,47,48,49,52,54,59,61,62,66]

CMOC 54: If activities are mainstream and involve others without dementia (e.g. family/carers or locals from the community) (C), then members are more likely to keep coming (O), as they will feel activities are more normalised, reducing stigma and increasing enjoyment (M). [37,46,47,48,54,57,61,76]

CMOC 55: If an intervention is treated as a “dementia free zone” where talk is not about a person’s condition or medical issues (unless they want to raise them) (C), then people are more likely to keep coming (O), as they will find the environment more normalising and less stigmatising (M). [58,71]

CMOC 56: If an initiative contains projects which enable members to contribute to helping others in the community (C), then people are more likely to keep coming (O), because they will feel valued, useful and empowered (M). [47,67]

CMOC 57: If an initiative has links to existing mainstream public amenities (C), then people are more likely to keep coming (O), as they will recognise it gives them access to wider networks of support and friendship (M). [90]

CMOC 58: If members are involved in group decision-making and setting expectations (C), then people are more likely to keep coming (O), because they will feel ownership and investment in the group and confidence that the group is tailored towards their needs (M). [43,52,65,66,71,74,84]

CMOC 59: If regular feedback meetings are held to “tune” an intervention to the wants and needs of members (C), then people are more likely to keep coming (O), as activities will be kept appropriate and evolve to suit the membership (M). [41,44,45,48,55,67,91]

CMOC 60: If individuals are allowed to make their own decisions about what they do or don’t do during a session (C), then they will be more likely to keep coming (O), as they will feel their independence and freedom is respected and their voice heard (M). [36,40,43,63,91]

CMOC 61: If staff treat people respectfully as equals and relate personally (C), then people are more likely to keep coming (O), because they will feel staff and the group as a whole understands them and their needs (M). [40,42,44,45,46,63,65]

CMOC 62: If strategies are planned to review individual progress and involvement (C), then people are more likely to keep coming (O), as they are more likely to remain engaged and feel part of the group as a whole (M). [43,59,74]

CMOC 63: If personnel listen to and act upon regular input from family and caregivers (C), then people are more likely to keep coming (O), as they will appreciate the increased personalisation and sensitivity to their needs (M). [41,59,61,63,91]

CMOC 64: If an initiative does not pay attention to the needs of family and care partners (C), then people are less likely to keep coming (O), because there may be unaddressed logistical difficulties for the family or carers such as fit with work or transport issues (M). [38,44,45,47,54,60,61,73,78]

CMOC 65: If an initiative can open for more hours and help arrange transport (C), then people are more likely to come (O), as this will take the pressure off family members and carers to be flexible and arrange things, and bypass logistical difficulties (M). [44,45,48,49,50,57,78]

CMOC 66: If members who are no longer the target for the intervention stay on because there is no exit strategy or onward service capacity (C), then this can discourage target members from continuing to attend (O), as they may feel the service is too stretched to meet their needs (M). [41,43,61]

CMOC 67: If an initiative does not cater equally both for new members and older members whose condition has progressed (C), then this can discourage one group or the other from continuing to attend (O), as they will feel the initiative is more focussed upon the other group hence not appropriate for them (M). [66,71,75]

CMOC 68: If a group or activity is not matched with members’ interests and ability (C), then members may stop attending (O), as they will feel it is not appropriate for them or meeting their needs (M). [46,48,49,78]

CMOC 69: If activities involve a degree of challenge or learning (C), then members may be more likely to keep coming (O), as they will feel empowered and have a sense of achievement (M). [37,47,58,67,71,76]

1  
2  
3 CMOC 70: If an intervention pre-assesses members and plans strategies to meet their individual needs (C), then members are more likely  
4 to keep coming (O), because activities and support will be more likely to be appropriate for them (M). [43,44,45,57,59,60,74]

5 CMOC 71: If a venue is comfortable, familiar and stable, with adequate space and facilities (C), then people are more likely to keep coming  
6 (O), as they will feel relaxed, secure and at home there (M). [43,48,55,63]

7 CMOC 72: If a venue has multiple spaces within it (C), then people are more likely to feel comfortable there (O), as they will be able to  
8 move around and have a choice of activities, environments, social sub-groups or levels of involvement in activity (M). [63,89]

9 CMOC 73: If sessions are regular, routine and structured (C), then members will be more likely to keep coming (O), as they will feel  
10 comfortable and secure in the familiarity and reliability of proceedings (M). [38,40,43,47,48,65,72,73,75]

11 CMOC 74: If the venue and timings remain reliably the same (C) then members are more likely to keep coming (O), as it will become part  
12 of their routine (M). [43,48]

13 CMOC 75: If there is no continuity of staff or not enough staff to ensure reliable provision (C), then members may be less likely to keep  
14 coming (O), as they will find it difficult to have confidence and build trust in the intervention and its staff (M). [36,47,66]

15 CMOC 76: If an intervention works to a tried and tested model (C), then members are more likely to feel secure (O), as that model will  
16 provide a structure that works (M). [61]

17 CMOC 77: If there are not new ideas and some variety planned across the calendar (C), then members may stop coming (O), because they  
18 may feel the group/activities have become stale and boring (M). [37,43,67]

### 21 **Getting Staff and Volunteers**

22  
23 CMOC78: If an initiative engages in community outreach such as talks and training with other groups and at events (C), then this will help  
24 attract volunteers (O), because the initiative's profile will be raised with wide range of stakeholders in the community (M). [46,59,83]

25 CMOC79: If awareness is raised in the community about the activities and benefits of a what an initiative does (C), then it will be more  
26 likely to attract appropriate personnel (O), as potential staff and volunteers will understand its value to service users and what they can do  
27 to help (M). [56,61,89,91]

28 CMOC80: If an initiative has links with like-minded groups (C), then they may get help finding and training staff volunteers (O), as they will  
29 be able to share ideas and practice on what is successful (M). [50,91]

30 CMOC81: If an initiative approaches established community organisations and authorities (third sector, faith or local authority) (C), they  
31 are more likely to get help with finding volunteers (O), as these organisations are likely to have access to an existing volunteer workforce  
32 or contacts that could help (M). [69,77]

33 CMOC82: If an initiative has links with professional, third sector or educational bodies (C), they may help with creating a more skilled  
34 workforce (O), because they may have the remit provide training for staff and volunteers (M). [80,84]

35 CMOC83: If an initiative is hosted by a public venue or local club (C), this may help with staffing (O), as the venue or club may have existing  
36 staff who can help with running things (M). [48,58,67,69]

37 CMOC84: If a community has an educational establishment running a health and social-care course (C), this could be a source of  
38 volunteers (O), as students/trainees will have the drive and interest to work with social-care-related activities to gain experience (M).  
39 [62,65,91,92,93]

40 CMOC85: If a formal partnership is agreed with an educational establishment (C), this will guarantee regular volunteers during term time  
41 (O), as work placements can be formalised as part of students' courses (M). [65,92,93]

42 CMOC86: If the initiative is in a rural area (C), then it can be more difficult to recruit volunteers (O), as there may be no educational  
43 establishment or body of students/trainees to recruit from (M). [53,83]

44 CMOC87: If the initiative is in a rural area (C), then it may take more time to recruit volunteers (O), as familiarity and personal contacts  
45 tend to be more important in small, close-knit communities (M). [83]

46 CMOC88: If the initiative is in a rural area (C), then it may be more difficult to recruit staff and volunteers (O), as they may not live  
47 geographically near members or the venue, presenting extra logistical challenges (M). [53,83]

48 CMOC89: If a community has a population of active retirees (C), this could be a source of volunteers (O), as they are likely to have time and  
49 experience conducive to volunteer work with older people (M). [56]

50 CMOC90: If there are friends and family of current or previous members/service users that are available (C), this could be a source of  
51 volunteers (O), as they will understand the value of the intervention and already be invested in it (M). [56,81]

52 CMOC91: If there are no specialist elements to the intervention or members with high care needs (C), then personnel do not need to have  
53 professional training or expertise (O), as they will still be able to understand and deliver the intervention for the benefit for service users  
54 (M). [58,72]

55 CMOC92: If in intervention has more than one skilled facilitator (C), then it can benefit more members (O), as the workload can be split  
56 and more one-on-one support for members offered (M). [71,73,75]

57 CMOC93: If an initiative's leaders/co-ordinators have good communication and interpersonal skills (C), then it is more likely to be  
58 successful (O), as they will engage and inspire other staff and volunteers (M). [38,51,61,79]

CMOC94: If volunteers' availability and interpersonal skills are inconsistent (C), an initiative is less likely to be successful (O), as it will not have a reliable workforce to run it (M). [73]

CMOC95: If funded support worker roles exist (C), then a reliable volunteer workforce is more likely (O), because they can help build a volunteer base (M). [50]

### **Keeping Staff and Volunteers**

CMOC 96: If personnel are flexible and open to new ways of working (C), then they are more likely to work effectively (O), as they will be more likely to collaborate with others, sharing knowledge, experience, innovation, resources and effective working practices (M). [59,60,79,93]

CMOC 97: If personnel have advice or training to boost communication and collaboration skills (C), then they are more likely to work effectively (O), as they will be more able to share knowledge, experience, innovation, resources and effective working practices (both internally and externally) (M). [60,76]

CMOC 98: If personnel are driven and able to deal with stress (C), then they are more likely to continue (O), as they will be able to overcome the challenges and demands of running an intervention (M). [61]

CMOC 99: If facilitators are not able to take time for self-care (C), then they will burn out (O), as running an intervention can be challenging and emotionally demanding (M). [43,75]

CMOC 100: If time is taken to plan strategies for recruitment, training, support, retention and balance of personnel at the start (C), then personnel problems and burn out can be avoided (O), as planners will have thought through the challenges involved and put in place actions to tackle them (M). [70,74]

CMOC 101: If personnel have access to experienced tips and guidance (from materials or individuals) throughout an intervention's start-up period (C), they are more likely to continue (O), as they will be better informed to resolve problems and avoid common pitfalls (M). [37,56]

CMOC 102: If there is an ethos of inclusion, community, camaraderie and helping people (C), then personnel will be more likely to continue (O), as they will feel enjoyment and benefit from this ethos along with members/service users (M). [52,58,75]

CMOC 103: If there are a range of roles and levels of involvement for volunteers (C), they are more likely to be satisfied with volunteering (O), as they can do something that suits them and their abilities that they are comfortable with and interested in (M). [84]

CMOC 104: If volunteers are included in professional activities and training (C), they are more likely to be satisfied with volunteering (O), as they will feel their skills and development are valued by the initiative (M). [38]

CMOC 105: If there is limited and inconsistent funding (C), then an intervention is less likely to be able to retain paid staff (O), because their jobs and the long-term future of the intervention will not be secure (M). [73,79,84]

CMOC 106: If personnel roles are not secure (C), then an initiative is less likely to sustain (O), because turnover will be high and key individuals with key experience and contacts will be lost (M). [67,79,84]

CMOC 107: If volunteers are seen by authorities and commissioners as "coming for free" (C), then they are less likely to continue (O), as they will feel un-valued with their time and expertise taken for granted (M). [87]

CMOC 108: If unpaid volunteers are treated as a replacement for professional staff (C), then staff are less likely to continue (O), as they will feel their roles are undermined and un-valued (M). [51]

CMOC 109: If financial assistance is made available for volunteer groups (C), then they are more likely to continue (O), as they will have the resources and support to run more activities (M). [50]

### **Getting Support of Other Organisations**

CMOC 110: If there is a higher public awareness and profile for people living with dementia (C), then dementia-targeted interventions are more likely to get support from other organisations, services and amenities (O), because there will be more recognition of their importance for society in general (M). [39,84,90]

CMOC 111: If the added value of an intervention is made clear to other organisations (C), then it is more likely to get support and find a place in the local care offer (O), because other organisations will understand its value to their members/service users (M). [41,42,50,54,55,61,75,79,86]

CMOC 112: If an intervention engages with research and evaluation to gather evidence of benefits (C), then it is more likely to get support (O), because the resulting reports will lend it legitimacy in the eyes of other organisations (M). [37,70,80]

CMOC 113: If it is made clear that an intervention is based upon a strong evidence-based model (C), then it is more likely to get support (O), because that model will lend it legitimacy in the eyes of other organisations (M). [41,79,86]

CMOC 114: If an intervention involves the local community in its steering (C), then it likely to attract further community support (O), as key people and organisations in the community with wider links will feel a sense of ownership and investment (M). [84]

CMOC 115: When there are a range of organisations (e.g. local authority, third sector, faith, business and education) active in the community (C), they may be willing to offer support if asked (O), as they may have a remit to share resources such as venue space and facilities, equipment, training, staff, volunteers or contacts (M). [48,52,58,62,65,67,69,77,80,92,93]



1  
2  
3 CMOC 116: If an intervention model is flexible (C), then it has a better chance of finding support (O), as it can accommodate being run at a  
4 range of venue types in, a range of ways, by a range of host organisations (M). [69,71,72,75]

5 CMOC 117: If an existing social care business is approached (C), they may support, host or partner an intervention (O), as it may help them  
6 attract clients/customers (M). [75]

7 CMOC 118: If training and guidance is available from a public or third sector authority (C), this may help gain further support (O), as it will  
8 help an intervention develop its skills and expertise in marketing, networking and outreach (M). [46]

9 CMOC 119: If an intervention is based in a civic centre or public venue (C), then it is more likely to get support from other local  
10 organisations (O), because it will be visible to others sharing that space (M). [59,79]

11 CMOC 120: If an intervention focuses on building links with local organisations and services (C), it is more likely to get support (O), as it is  
12 easier to bring together a network of those who are already invested in the same community and some links will already exist (M).  
13 [41,42,62]

14 CMOC 121: If an intervention is run at a public venue or local club (C), then links with others in the community are easier to forge (O), as  
15 there will be an existing network of venue/club users and contacts that the intervention can access (M). [41,48,58,62]

16 CMOC 122: If a group or activity is small scale (C), then it can be hard to get support (O), as it is more difficult for them to network with  
17 larger organisations, authorities, movers and shakers (M). [77]

18 CMOC 123: If struggling groups in the same area merge (C), they can support each other (O), because they can pool resources, personnel,  
19 knowledge and ideas (M). [67]

20 CMOC 124: If links are forged with a national network of similar interventions (C) then they can support each other (O), because they can  
21 pool resources, knowledge, contacts and strategy (M). [42]

22 CMOC 125: If a locality has other organisations working with the same target population (C), then in intervention may struggle to get  
23 support (O), as those other organisations and their supporters may perceive the intervention as competition (M). [41,79]

24 CMOC 126: If an intervention has a clear place in the local offer without service/role overlap (C), then it is more likely to get the support of  
25 others (O), because they will see it as complementing their service not competing with it (M). [42,51]

26 CMOC 127: If other organisations are informed, invited to meetings and asked for help and advice early on (C), then an intervention is  
27 more likely to get the support (O), because they will feel respected and invested in the success of the new intervention (M). [51,61,79,84]

28 CMOC 128: If groups involve professionals already working with individual members (e.g. case workers, carers) in activities (C) then they  
29 are more likely to increase support from professional services (O), because professionals will understand the value of the intervention to  
30 their service-users and feel invested in its success (M). [79]

31 CMOC 129: If an intervention acts as a hub for/gate/link to other services and is tuned to dovetail with them (C), then it is more likely to  
32 get the support of those services (O), because they will see the intervention as being of help to them (M). [42,60,61,72,86,88]

33 CMOC 130: If an intervention offers a benefit or resource to the wider community (C), then it is more likely to get the support of other  
34 community organisations (O), as they will see it as benefiting their members/service users (M). [41,46,67,70]

35 CMOC 131: If an intervention offers to do reciprocal work, sharing knowledge and resources with other organisations (C), then it is more  
36 likely to get their support (O), as they will see the benefit to working together (M). [41,46,67,70]

37 CMOC 132: If there is a disjoin between national policy and local need (C), then initiatives can struggle to get and keep support (O),  
38 because by adhering to one they will neglect the other, alienating would-be supporters (M). [51]

39 CMOC 133: If there were ring-fenced funding to support dementia-targeted community initiatives as part of national policy (C), then small,  
40 local initiatives would get support (O), as there would be incentives for health services and LAs to help them (M). [39,59,69]

41 CMOC 134: If health and social care authorities commissioned services to work with community initiatives (C), then small, local initiatives  
42 would get support (O), because it would ensure the collaboration of services and organisations at different levels (M). [47,50,77]

43 CMOC 135: If health pathways were developed around existing social networks (C), then small, local initiatives would get support (O), as it  
44 would encourage more community collaboration and co-production with health services (M). [47]

45 CMOC 136: When national and official organisations take the lead in working with small, local initiatives (C), this helps more consistent  
46 provision of local services across regions (O), because there is more joined-up strategic direction of what is on offer and available (M).  
47 [39,50]

48 CMOC 137: When national and official organisations show support for the involvement of private sector partners (C), then small, local  
49 initiatives are more likely to get support (O), as it provides private sector organisations with the incentive, tools and guidance to work in  
50 partnership (M). [39]

### 51 **Keeping Support of Other Organisations**

52 CMOC 138: If communication is not maintained (C), then support of others can drop away (O), as interest and enthusiasm may dwindle in  
53 tandem with an intervention's contact and visibility to its collaborators (M). [41,55]

54 CMOC 139: If information sharing and knowledge transfer is not maintained (C), then support of others can drop away (O), as  
55 communication and administration problems may arise between collaborating parties (M). [44,45,77]

1  
2  
3 CMOC 140: If there is a designated person with responsibility for regular and consistent communication with other organisations (C), then  
4 continued support is more likely (O), as they will have the time to pay attention to maintaining collaborative working, and build experience  
5 and relationships with key people in doing so (M). [41,50]

6 CMOC 141: If relationships with key people in other organisations are maintained (C), then support of those organisations is more likely to  
7 continue (O), as an intervention will create “champions” within those organisations (M). [39,51]

8 CMOC 142: If staff turnover (internal and external) is high (C), then support can be lost (O), because communication and relationships with  
9 contacts and “champions” can suffer due to the loss of key personnel (M). [67,79,84]

10 CMOC 143: If there is a difference in culture between collaborating organisations (C), then effective support can be hindered (O), as  
11 personnel from each organisation will not be working with the same focus and goals (M). [41,51,79]

12 CMOC 144: If groups or sectors have a negative or competitive attitude towards each other (C), then effective support can be hindered  
13 (O), as it creates problems sharing data, learning and resources (M). [41,76,77]

14 CMOC 145: If an intervention makes effort to learn about and embed in the life of a supporting organisations (C), then it is more likely to  
15 maintain support (O), as it will understand that host organisation better and share the same goals (M). [70]

16 CMOC 146: If staff (internal and external) are experienced in working collaboratively (C), then an intervention is more likely to maintain  
17 support (O), as staff will be more skilled, flexible and understanding when working with those from another organisation (M). [79]

18 CMOC 147: If independent advice on communication (internal and external) and collaboration is available (C), then an intervention is more  
19 likely to maintain support (O), as leaders, staff and volunteers will become more skilled at networking and working together while  
20 overcoming differences in culture (M). [60,79]

21 CMOC 148: If there are multiple forms of strong inter-professional leadership (C), then collaboration is likely to be more successful (O),  
22 because there will be mutual learning with leaders setting an example for others to follow (M). [51,59,79,86]

23 CMOC 149: If time is taken to plan well early on (C), then support from others is more likely to be maintained (O), as personnel will have  
24 thought through the challenges involved in maintaining energy and enthusiasm and put in place actions to tackle them (M). [70]

25 CMOC 150: If there is a steering group including outside organisations (C), then support is more likely to be maintained (O), as steering will  
26 include a focus on shared agenda and complementarity with outside organisations (M). [51]

27 CMOC 151: If a partnership is not equal and collaborating at all stages, from planning to practice (C), then this could hinder support (O), as  
28 one party may feel the other is not contributing what it should while the other feels dictated to, creating friction (M). [44,45]

29 CMOC 152: If a collaboration protocol with supporting organisations is drafted and discussions logged and reviewed (C), then support is  
30 more likely to be maintained (O), because all parties will have the chance air and resolve issues and have clarity over expectations and  
31 mutual goals (M). [41,44,45,61,70]

### 32 33 34 **Getting Funding and Income**

35 CMOC 153: If potential funders are not clear on what a service/intervention is and does (C), then they will be less likely to fund it (O),  
36 because they do not understand its purpose or value (M). [89]

37 CMOC 154: If potential funders are made aware of the added value and benefit of an intervention (C), then they will be more likely to fund  
38 it (O), because they will recognise it has something uniquely valuable to offer service users (M). [61,70]

39 CMOC 155: If communication and publicity is regularly disseminated to potential funders (C), then they are more likely to fund in the  
40 future (O), as they will be familiar with and alert to the work of an intervention (M). [94]

41 CMOC 156: If recognised and standardised materials (e.g. Alzheimer’s Society materials, PQASSO or Social Return on Investment  
42 evaluation) are used to gather and communicate evidence of worth (C) then funders are more likely to fund (O) as they will see that  
43 evidence as more legitimate than anecdotal accounts (M). [80]

44 CMOC 157: If potential funders are made aware of links with and support from other organisations (C), then they’re more likely to fund (O)  
45 because they are likely to view the support of others as adding legitimacy to a community initiative (M). [70]

46 CMOC 158: If corporate organisations are made aware of how an intervention aligns with its aims (C), then they will be more likely to  
47 sponsor or donate (O), as they will feel supporting that intervention helps progress their goals (M). [94]

48 CMOC 159: If an intervention develops its skill in networking and communicating with other organisations (C), then it is more likely to find  
49 funding (O), as it will learn of funding opportunities through a wider network of support and contacts (M). [46]

50 CMOC 160: If awareness of the wants and needs of people with dementia is raised in society in general (C), then funders are more likely to  
51 support a dementia-targeted initiative (O), as they are more likely to recognise that it meets the needs of service-users (M). [39,46]

52 CMOC 161: If there is demand for an intervention from service users and referrers (C), then funders are more likely to fund (O), as they will  
53 recognise that it is meeting people’s needs (M). [46]

54 CMOC 162: If potential members/service users are not clear on what a service/intervention is and does (C), then they will be less likely to  
55 try it (O), because they do not understand it’s purpose or value to them (M). [41,51,56,89]

56 CMOC 163: If potential referrers are not clear on what a service/intervention is and does (C), then they will not refer people to it (O),  
57 because they do not understand its purpose or value to their service users (M). [41,51,61,75,79]



- 1  
2  
3 CMOC 164: If an intervention is perceived as more expensive than alternatives on offer without offering significant added value (C), funders will be less likely to fund (O), as they will not see it as value for money (M). [79,80,87,95]
- 4  
5 CMOC 165: If an initiative is perceived as having financial difficulties (C), potential funders are less likely to fund (O), as they will see it as a high risk funding decision (M). [56,61]
- 6  
7 CMOC 166: If an initiative has co-operative working arrangements with other community organisations (C), then this can help keep costs low (O), as they can agree to share resources (venue, personnel, equipment, training etc.) (M). [70,75,76,78,80,93]
- 8  
9 CMOC 167: If an initiative can generate some income through offering services to others(C), then funders are more likely to have confidence in it (O), as they will perceive it be to more viable (M). [94]
- 10  
11 CMOC 168: If funders are made aware of the support from other organisations for a new initiative (C), they are more likely to fund (O), as they will perceive the initiative as being more viable due to that support (M). [70]
- 12  
13 CMOC 169: If initiative can act as a gate/link for other services and community organisations (C), then it is more likely to get funding (O), as it will be seen as of value to enhancing existing services and organisations (M). [60,61]
- 14  
15 CMOC 170: If intervention personnel have good, up-to-date knowledge of funding processes and policy (C), they are more likely to get funding (O), because they will understand how to plan and implement an effective strategy to seek and find it (M). [55,61,86]
- 16  
17 CMOC 171: If like-minded groups share successful ideas (C), they are more likely to find funding solutions (O), because they will be able to learn from each other about what works or doesn't work (M). [80,91]
- 18  
19 CMOC 172: If interventions include more practical detail on resources, costs and funding as part of standard reporting/evaluation (C), then others in the future will be more likely to find funding solutions (O), as they can learn from the experience of others about what works or doesn't work (M). [37]
- 20  
21 CMOC 173: If authoritative help is available to develop personnel's expertise regarding business planning and networking (C), then an intervention is more likely to find funding solutions (O), because personnel will be better at developing and implementing a strategy to do so (M). [46]
- 22  
23 CMOC 174: If an intervention has a realistic strategy to attract donations and grants (C), then it is more likely to find funding solutions (O), as personnel will have thought through the challenges involved and put in place actions to tackle them (M). [94]
- 24  
25 CMOC 175: If an intervention has a business case ready (C), then it is more likely to secure funding (O), as it will be able to respond quickly when a window of opportunity opens with a potential funder (M). [60]
- 26  
27 CMOC 176: When an initiative is in a more rural area (C), it is likely to be small scale with fewer members/service users (O), because the population is geographically diffuse without the infrastructure to gather together easily (M). [84]
- 28  
29 CMOC 177: If an initiative is small-scale (C), it will not be able to robustly demonstrate demand, effectiveness and H&SC savings (O), because it's number or members/service users will not be enough to capture robust evidential statistics (M). [84]
- 30  
31 CMOC 178: If funders demand robust statistical evidence before funding (C), then small and rural groups and activities will be disadvantaged (O), because they will not have the numbers and resources to produce this (M). [50,84,91]
- 32  
33 CMOC 179: If an initiative is small-scale (C), it will be disadvantaged in securing funding (O), as it will have fewer personnel with more limited time and resources to continually apply (M). [84]
- 34  
35 CMOC 180: If an intervention is aligned with national agenda (C), then it is more likely to get funding (O), because the policy and infrastructure will be in place to support it (M). [42,55,59,84]
- 36  
37 CMOC 181: If national policy is not consistent with local need (C), then local groups serving those needs will struggle to attract funding (O), as funders will not see their cause as a priority (M). [41,51,84]
- 38  
39 CMOC182: If the national (and by extension funders') agenda focuses on medical needs and costs over social and emotional needs (C), then community-focussed groups and activities will struggle to get funding (O), as funders will not understand their benefits or see their cause as a priority (M). [77,80,86,91,95]
- 40  
41 CMOC 183: If intervention providers, service users and families speak out about their needs (C), providers may be more likely to get funding for local community-focussed services (O), as authorities will feel pressure to change the national agenda to meet people's needs (M). [96]
- 42  
43 CMOC 184: If resources are not allotted and ring-fenced to match changes in national or local policy (C), there will be no benefit to community interventions (O), as funders will not have the resources to invest in making a difference in practice (M). [39,50,76,87]
- 44  
45  
46  
47  
48  
49  
50  
51  
52  
53

### **Keeping Funding and Income**

- 54 CMOC 185: If communication and publicity is regularly disseminated to funders (C), then they are more likely to fund again in the future (O), as they will be kept informed and alert to the continuing work and benefits of an intervention (M). [94]
- 55  
56 CMOC 186: If publicity and networking is pared back to cut costs (C), this could negatively impact changes of finding continued funding (O), as an intervention will drop off funders' "radar" and risk being forgotten or overlooked (M). [94]
- 57  
58 CMOC 187: If funders are made aware of a growth in demand for an intervention from service users and referrers (C), then they are more likely to continue to fund (O), as they will recognise that it is meeting people's needs (M). [46,55]
- 59  
60

1  
2  
3 CMOC 188: If funders are made aware of accruing evidence of the added value and benefit of an intervention (C), then they will be more  
4 likely to fund it (O), because they will recognise it has something uniquely valuable to offer service users (M). [61,70]

5 CMOC 189: If groups and organisations do not communicate and work together (C), then existing funds will not go as far (O), as available  
6 financial resources will be split and lost on inefficiencies and duplication of services (M). [76]

7 CMOC 190: If an initiative has co-operative working arrangements with other community organisations (C), then this can help keep costs  
8 low (O), as they can agree to share resources (venue, personnel, equipment, training etc.) (M). [70,75,76,78,80,93]

9 CMOC 191: If an initiative has multiple and diverse income streams (C), then it is more likely to maintain a proportion funding (O), because  
10 if one stream stops, others will still be available. [70,80,84]

11 CMOC 192: If an initiative's budget is broken down into identified parts (C), then it is more likely to be able to weather changes in funding  
12 (O), as what can be used to pay for what is more flexible, and core activity can be prioritised (M). [70,84,94]

13 CMOC 193: If financial planning is done with a focus on the long-term (C), then an initiative is more likely to weather changes in funding  
14 (O), as it will be able to spread existing funds more effectively by allotting spending carefully (M). [44,45,70]

15 CMOC194: If an intervention has a realistic strategy to continually attract donations and grants (C), then it is more likely to find funding  
16 solutions (O), as personnel will have thought through the challenges involved and put in place actions to tackle them (M). [94]

17 CMOC 195: If there is no long-term funding available (C), this will place significant demands on the time and resources of personnel (O),  
18 because they will need to continually seek and apply for fresh funding (M). [84]

19 CMOC 196: If an initiative is small-scale (C), it will be disadvantaged in continuing to secure funding (O), as it will have fewer personnel  
20 with more limited time and resources to continually seek and apply (M). [84]

21 CMOC 197: If an initiative continually and systematically seeks new income streams (C), then it is more likely to maintain a proportion  
22 funding (O), because if one stream stops, it will be more likely to have multiple other streams available (M). [70,80,84]

23 CMOC 198: If funders objectives are always short-term and keep changing (C), then deep learning on what works for services users and  
24 communities will be lost (O), as "quick win" projects will be encouraged over support for existing and experienced initiatives (M). [51,79]

25 CMOC 199: If funders only support short-term or new projects (C), then initiatives will struggle to become established long-term (O), as  
26 they will be unable to plan ahead with confidence or have time to learn how activity can be supported sustainably (M). [77,86,87]

27 CMOC 200: If resources are not allotted and ring-fenced to match changes in national or local policy (C), there will be no benefit to  
28 community interventions (O), as funders will not have the resources to invest in making a difference in practice (M). [39,50,76,87]

29 CMOC 201: If intervention providers, service users and families speak out about their needs (C), providers may be more likely to get  
30 funding for local community-focussed services (O), as authorities will feel pressure to change the national agenda to meet people's needs  
31 (M). [96]

## RAMESES publication standards (realist synthesis) checklist

(After BMC Medicine 2013, 11:21 <http://www.biomedcentral.com/1741-7015/11/21>)

| Items required when reporting a realist synthesis |                                       |                                                                                                                                                                                                                                                                                                                                                                                                                                                                                                                                                           | Reported on page(s) |
|---------------------------------------------------|---------------------------------------|-----------------------------------------------------------------------------------------------------------------------------------------------------------------------------------------------------------------------------------------------------------------------------------------------------------------------------------------------------------------------------------------------------------------------------------------------------------------------------------------------------------------------------------------------------------|---------------------|
| 1                                                 |                                       | In the title, identify the document as a realist synthesis or review                                                                                                                                                                                                                                                                                                                                                                                                                                                                                      | 1,2                 |
| ABSTRACT                                          |                                       |                                                                                                                                                                                                                                                                                                                                                                                                                                                                                                                                                           |                     |
| 2                                                 |                                       | While acknowledging publication requirements and house style, abstracts should ideally contain brief details of: the study's background, review question or objectives; search strategy; methods of selection, appraisal, analysis and synthesis of sources; main results; and implications for practice.                                                                                                                                                                                                                                                 | 2                   |
| INTRODUCTION                                      |                                       |                                                                                                                                                                                                                                                                                                                                                                                                                                                                                                                                                           |                     |
| 3                                                 | Rationale for review                  | Explain why the review is needed and what it is likely to contribute to existing understanding of the topic area.                                                                                                                                                                                                                                                                                                                                                                                                                                         | 4                   |
| 4                                                 | Objectives and focus of review        | State the objective(s) of the review and/or the review question(s). Define and provide a rationale for the focus of the review.                                                                                                                                                                                                                                                                                                                                                                                                                           | 5                   |
| METHODS                                           |                                       |                                                                                                                                                                                                                                                                                                                                                                                                                                                                                                                                                           |                     |
| 5                                                 | Changes in the review process         | Any changes made to the review process that was initially planned should be briefly described and justified.                                                                                                                                                                                                                                                                                                                                                                                                                                              | N/A                 |
| 6                                                 | Rationale for using realist synthesis | Explain why realist synthesis was considered the most appropriate method to use.                                                                                                                                                                                                                                                                                                                                                                                                                                                                          | 6                   |
| 7                                                 | Scoping the literature                | Describe and justify the initial process of exploratory scoping of the literature.                                                                                                                                                                                                                                                                                                                                                                                                                                                                        | 6-7                 |
| 8                                                 | Searching processes                   | While considering specific requirements of the journal or other publication outlet, state and provide a rationale for how the iterative searching was done. Provide details on all the sources accessed for information in the review. Where searching in electronic databases has taken place, the details should include, for example, name of database, search terms, dates of coverage and date last searched. If individuals familiar with the relevant literature and/or topic area were contacted, indicate how they were identified and selected. | 7-8                 |
| 9                                                 | Selection and appraisal of documents  | Explain how judgements were made about including and excluding data from documents, and justify these.                                                                                                                                                                                                                                                                                                                                                                                                                                                    | 8-9                 |
| 10                                                | Data extraction                       | Describe and explain which data or information were extracted from the included documents and justify this selection.                                                                                                                                                                                                                                                                                                                                                                                                                                     | 8-9                 |
| 11                                                | Analysis and synthesis processes      | Describe the analysis and synthesis processes in detail. This section should include information on the constructs analyzed and describe the analytic process.                                                                                                                                                                                                                                                                                                                                                                                            | 9                   |
| RESULTS                                           |                                       |                                                                                                                                                                                                                                                                                                                                                                                                                                                                                                                                                           |                     |
| 12                                                | Document flow diagram                 | Provide details on the number of documents assessed for eligibility and included in the review with reasons for exclusion at each stage as well as an indication of their source of origin (for example, from searching databases, reference lists and so on). You may consider using the example templates (which are likely to need modification                                                                                                                                                                                                        | 8                   |

| Items required when reporting a realist synthesis |                                                       |                                                                                                                                                                                                                                                                                                                                                                   | Reported on page(s) |
|---------------------------------------------------|-------------------------------------------------------|-------------------------------------------------------------------------------------------------------------------------------------------------------------------------------------------------------------------------------------------------------------------------------------------------------------------------------------------------------------------|---------------------|
|                                                   |                                                       | to suit the data) that are provided.                                                                                                                                                                                                                                                                                                                              |                     |
| 13                                                | Document characteristics                              | Provide information on the characteristics of the documents included in the review.                                                                                                                                                                                                                                                                               | 10                  |
| 14                                                | Main findings                                         | Present the key findings with a specific focus on theory building and testing.                                                                                                                                                                                                                                                                                    | 10-14               |
| DISCUSSION                                        |                                                       |                                                                                                                                                                                                                                                                                                                                                                   |                     |
| 15                                                | Summary of findings                                   | Summarize the main findings, taking into account the review's objective(s), research question(s), focus and intended audience(s).                                                                                                                                                                                                                                 | 14-15               |
| 16                                                | Strengths, limitations and future research directions | Discuss both the strengths of the review and its limitations. These should include (but need not be restricted to) (a) consideration of all the steps in the review process and (b) comment on the overall strength of evidence supporting the explanatory insights which emerged.<br>The limitations identified may point to areas where further work is needed. | 15-16, 17-18        |
| 17                                                | Comparison with existing literature                   | Where applicable, compare and contrast the review's findings with the existing literature (for example, other reviews) on the same topic.                                                                                                                                                                                                                         | 16-17               |
| 18                                                | Conclusion and recommendations                        | List the main implications of the findings and place these in the context of other relevant literature. If appropriate, offer recommendations for policy and practice.                                                                                                                                                                                            | 16-18               |
| 19                                                | Funding                                               | Provide details of funding source (if any) for the review, the role played by the funder (if any) and any conflicts of interests of the reviewers.                                                                                                                                                                                                                | 19-20               |
