# Supplementary material for: Sustaining community-based interventions for people affected by dementia long term: the SCI-Dem realist review
Source: PubMed Central journal article supplement — BMJ Open. 2021 Jul 7;11(7):e047789. doi: 10.1136/bmjopen-2020-047789 (PMC8264885; doi:10.1136/bmjopen-2020-047789), 2021-07-07
Supplement: bmjopen-2020-047789supp001.pdf [file bmjopen-2020-047789supp001.pdf]

## Supplementary file 1: Initial programme theory diagrams and coding themes

### Key to colour coding:

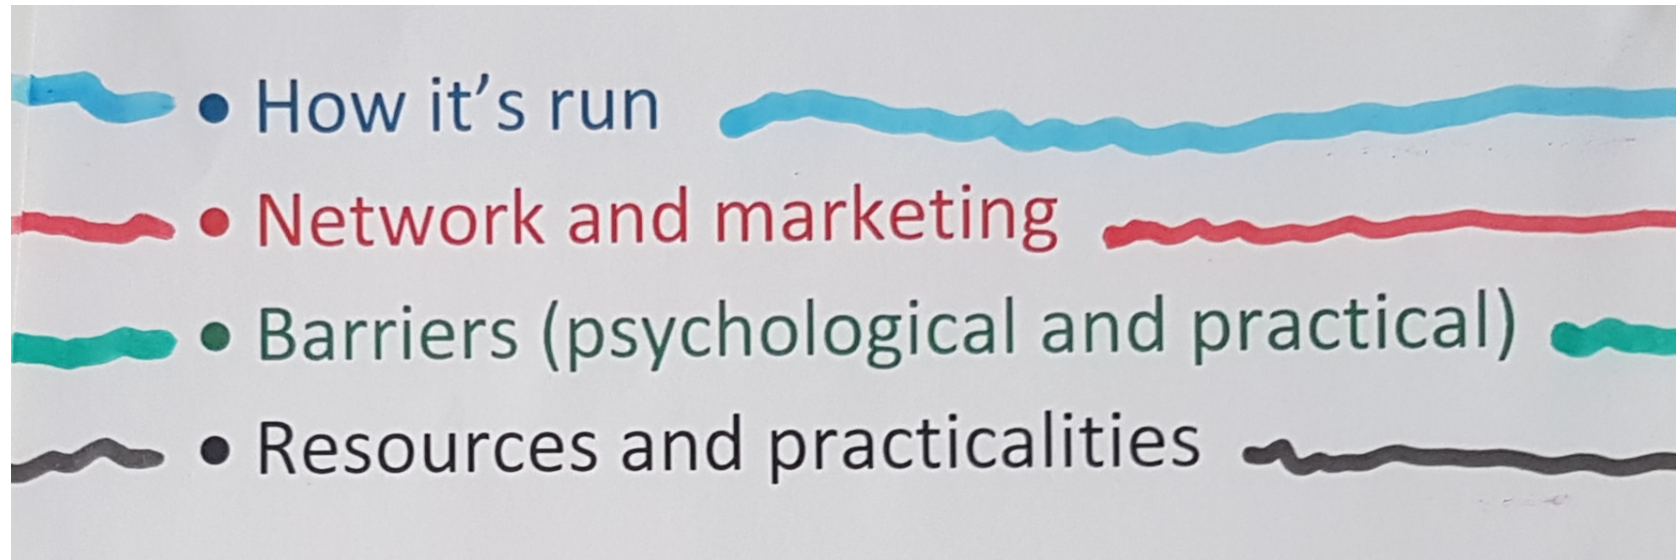

## Barriers and facilitators to engagement

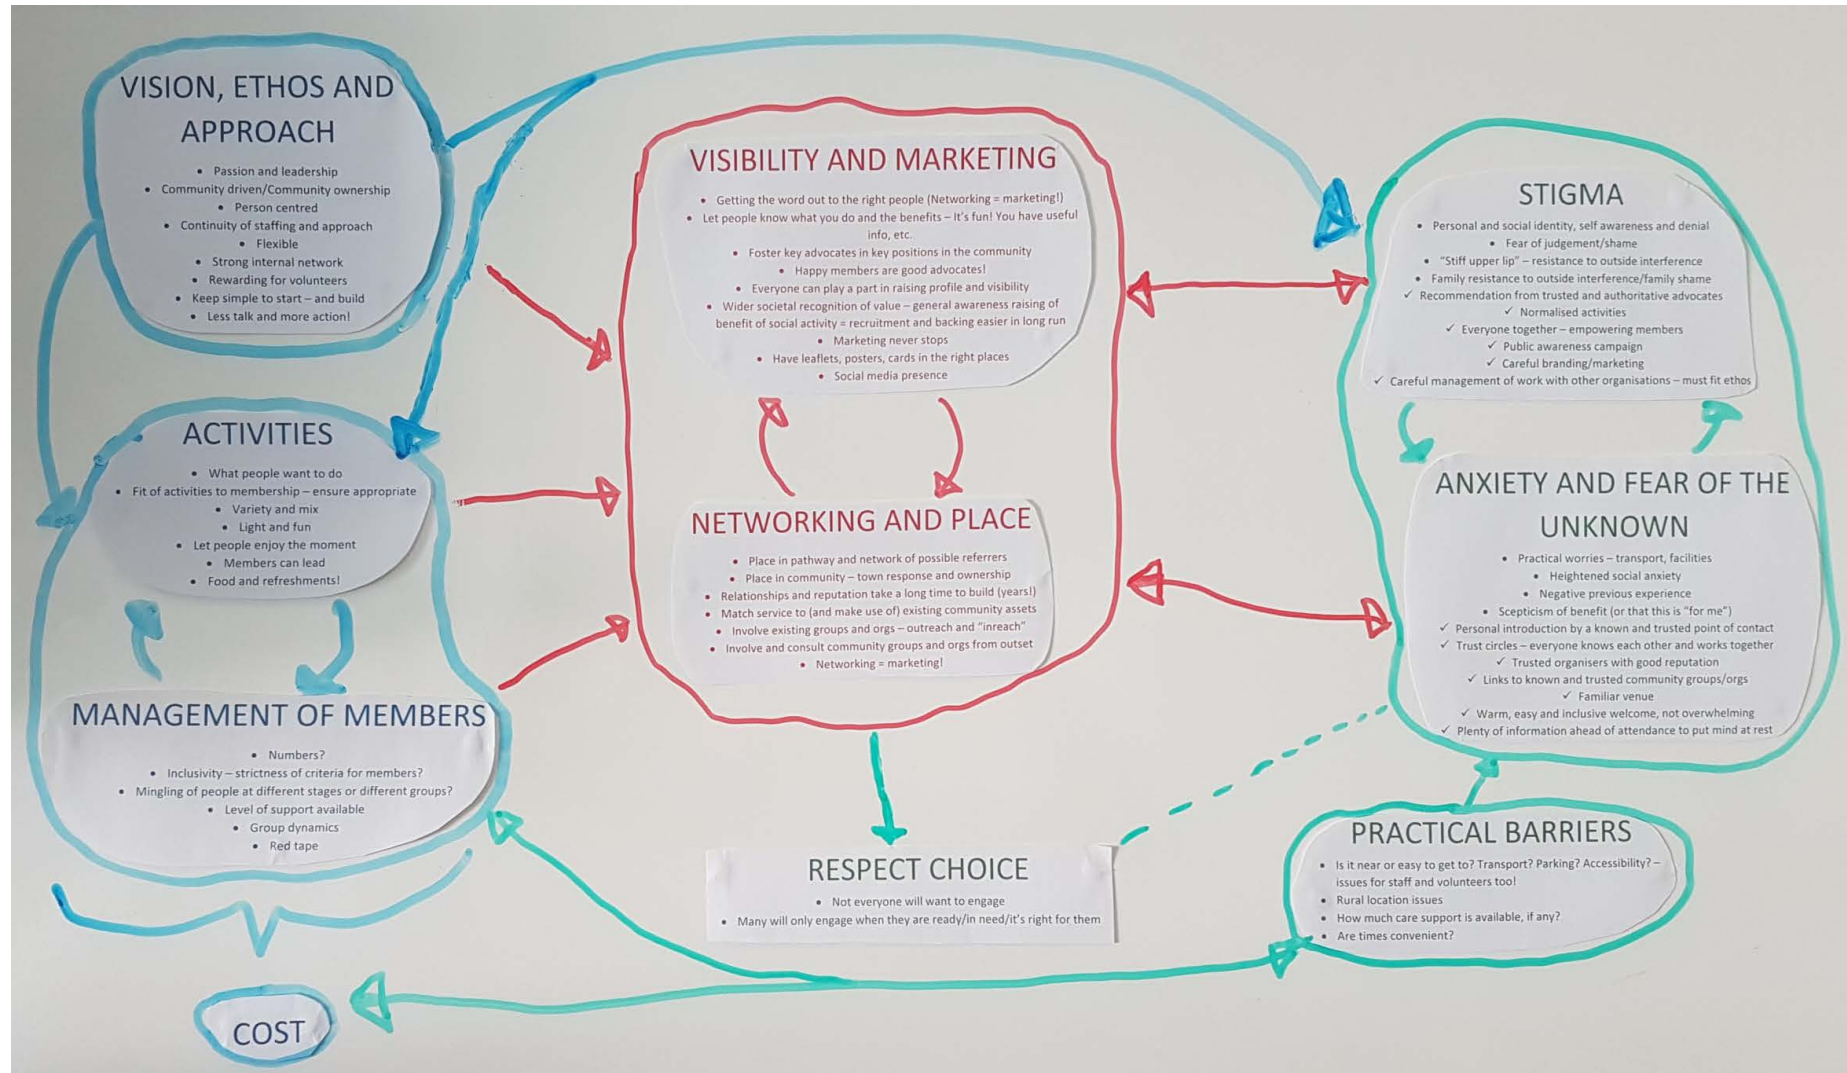

**Barriers and facilitators to sustainability**

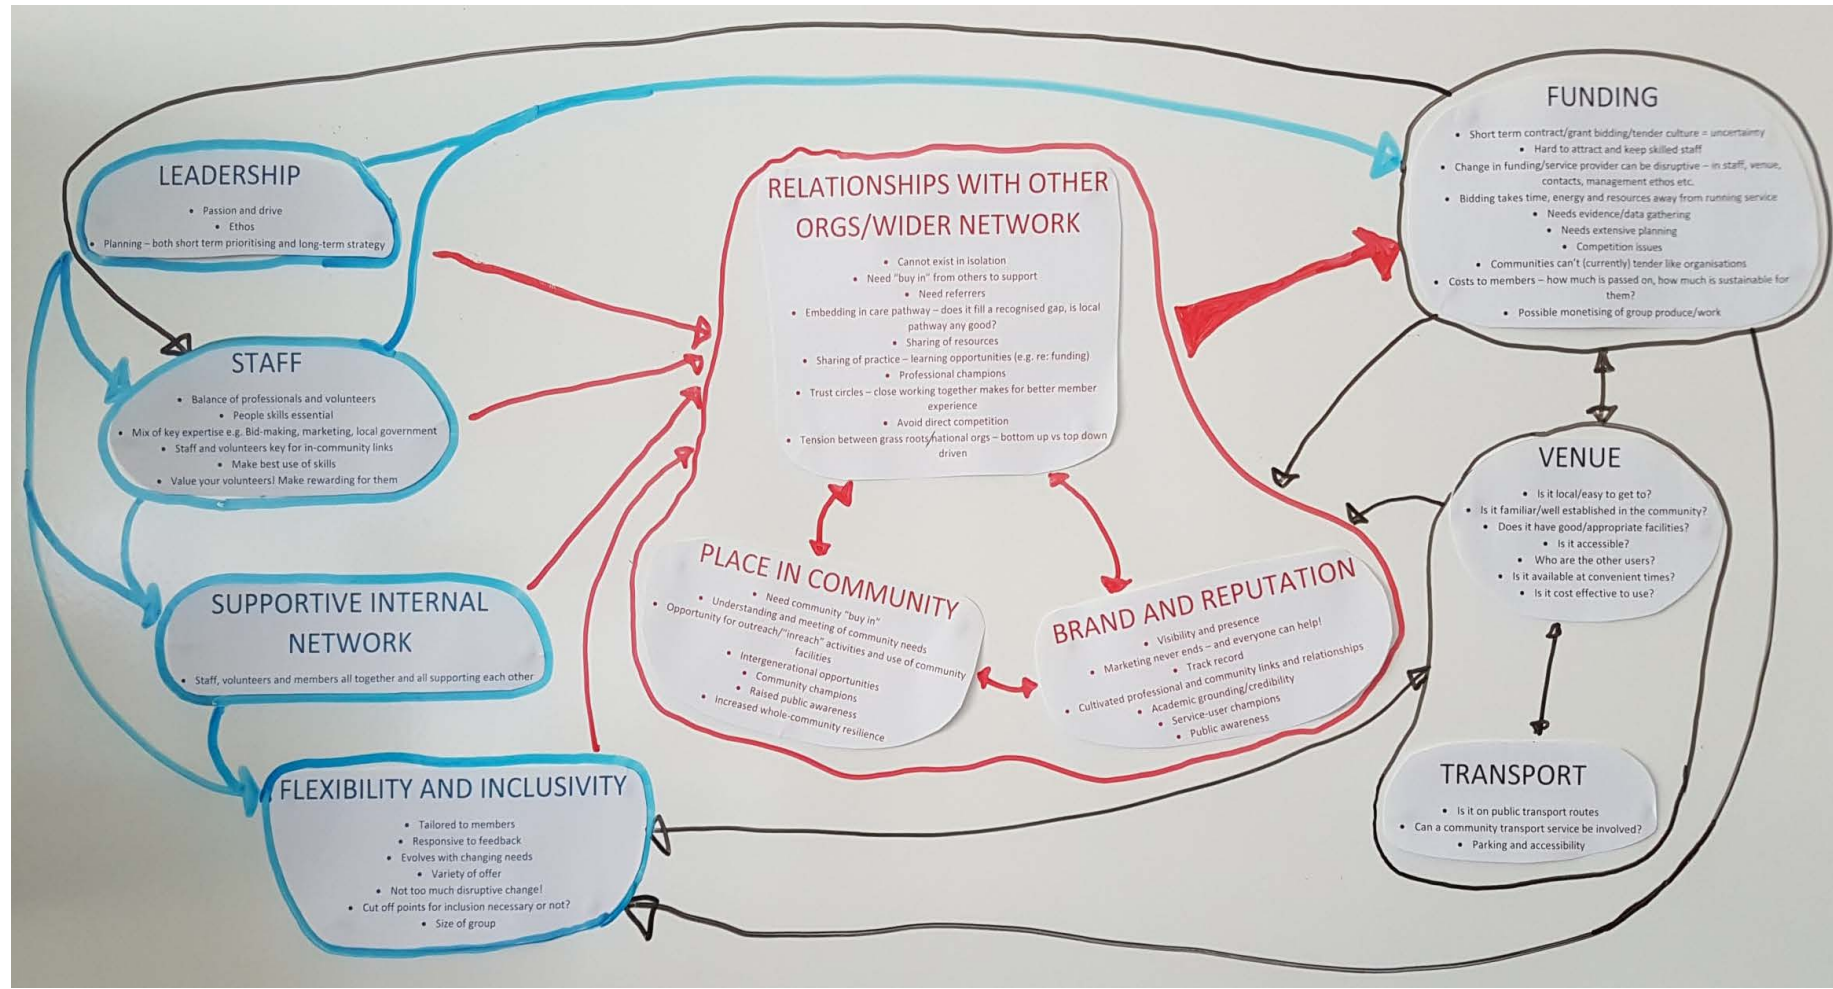



## Top-level “parent” coding categories in NVivo analysis of the data

| Name                                                    | Files | References |     |   |                                   |
|---------------------------------------------------------|-------|------------|-----|---|-----------------------------------|
| Leadership                                              |       | 54         | 226 | ● | <b>“How it’s run”</b>             |
| Management of members (inc flexibility and inclusivity) |       | 66         | 219 | ● |                                   |
| Staff and volunteer issues                              |       | 71         | 196 | ● |                                   |
| Activities                                              |       | 94         | 577 | ● |                                   |
| Ethos and approach                                      |       | 92         | 556 | ● |                                   |
| Stability and reliability of provision                  |       | 14         | 23  | ● |                                   |
| Anxiety and fear of unknown                             |       | 65         | 321 | ● | <b>Barriers to engagement</b>     |
| Transport and geography                                 |       | 39         | 87  | ● |                                   |
| Venue issues                                            |       | 60         | 203 | ● |                                   |
| Attendee characteristics                                |       | 62         | 216 | ● |                                   |
| Difficulty becoming a member                            |       | 23         | 50  | ● | <b>Networking &amp; marketing</b> |
| Visibility and marketing                                |       | 76         | 365 | ● |                                   |
| Place in the community                                  |       | 67         | 295 | ● |                                   |
| Relationships with other organisations                  |       | 71         | 567 | ● | <b>Money &amp; resources</b>      |
| Funding issues                                          |       | 64         | 327 | ● |                                   |
| Cost effectiveness issues                               |       | 35         | 68  | ● |                                   |
