# Supplementary material for: Sustaining community-based interventions for people affected by dementia long term: the SCI-Dem realist review
Source: PubMed Central journal article supplement — BMJ Open. 2021 Jul 7;11(7):e047789. doi: 10.1136/bmjopen-2020-047789 (PMC8264885; doi:10.1136/bmjopen-2020-047789), 2021-07-07
Supplement: bmjopen-2020-047789supp002.pdf [file bmjopen-2020-047789supp002.pdf]

## Supplementary file 2: Search strategy

### Databases:

EBSCOhost: **Academic Search Complete, CINAHL, MEDLINE, PsychINFO**

Other health and social care databases: **AMED, Embase, PubMed, Social Care Online**

Interdisciplinary databases: **ProQuest, Scopus**

Systematic reviews: **Cochrane Library, Campbell Collaboration**

Other/general: **Google Scholar**

**Limiters:** Published 1990 to present

| Key terms                            | String of related terms                                                                                                              |
|--------------------------------------|--------------------------------------------------------------------------------------------------------------------------------------|
| <b>Dementia</b>                      | Dementia                                                                                                                             |
| <b>Community</b>                     | Commun* OR Local* OR Social*                                                                                                         |
| <b>Intervention</b>                  | Intervention OR Program* OR Project OR Initiative OR Scheme OR Service OR Activit* OR Group OR Club OR Network OR Meeting OR Therapy |
| <b>Sustainability</b>                | Sustain* OR Maint* OR Manag* OR Facilitat* OR Barrier*                                                                               |
| <b>Implementation and Engagement</b> | Implement* OR Recruit* OR Engag*                                                                                                     |

Dementia AND (Commun\* OR Local\* OR Social\*) AND (Intervention OR Program\* OR Project OR Initiative OR Scheme OR Service OR Activit\* OR Group OR Club OR Network OR Meeting OR Therapy) AND (Sustain\* OR Maint\* OR Manag\* OR Facilitat\* OR Barrier\*)AND (Implement\* OR Recruit\* OR Engag\*)

### NOTES:

Search terms were kept uniform across all databases and searching was carried out by looking for the occurrence of these terms within the title, abstract and key words of documents in each database. If a database did not allow for this, the strategy was altered slightly to the closest option (e.g. in ProQuest this was searching everywhere in a document except full text; in PubMed this was by carrying out three separate searches by title content, by abstract content and key word content, then combining the results).
