# Supplementary material for: Sustaining community-based interventions for people affected by dementia long term: the SCI-Dem realist review
Source: PubMed Central journal article supplement — BMJ Open. 2021 Jul 7;11(7):e047789. doi: 10.1136/bmjopen-2020-047789 (PMC8264885; doi:10.1136/bmjopen-2020-047789), 2021-07-07
Supplement: bmjopen-2020-047789supp004.pdf [file bmjopen-2020-047789supp004.pdf]

## Supplementary file 4: Full lists of included articles

| Author(s)                                                                                                | Year | Article title                                                                                                                                     | Type of intervention                                                                                            | Country of origin                                                  | Type of article/study           | Publication                                          | Reference list No. |
|----------------------------------------------------------------------------------------------------------|------|---------------------------------------------------------------------------------------------------------------------------------------------------|-----------------------------------------------------------------------------------------------------------------|--------------------------------------------------------------------|---------------------------------|------------------------------------------------------|--------------------|
| Actifcare                                                                                                | 2017 | Best practice recommendations from the Actifcare study: Access to community care services for home-dwelling people with dementia and their carers | <b>community care services</b> in general                                                                       | Netherlands, Germany, Sweden, UK, Norway, Ireland, Portugal, Italy | Recommendations report          | www.actifcare.eu                                     | <b>36</b>          |
| Alzheimer's Australia                                                                                    | 2014 | The benefits of physical activity and exercise for people living with dementia (Discussion paper 11)                                              | <b>Exercise activities</b>                                                                                      | Australia                                                          | Report                          | Alzheimer's Australia                                | <b>69</b>          |
| Arkin                                                                                                    | 1999 | Elder rehab: A student-supervised exercise program for Alzheimer's patients                                                                       | <b>Weekly exercise programme</b> pairing elders and student helpers at a college gym (caregivers also involved) | US                                                                 | Journal paper - programme pilot | The Gerontologist                                    | <b>92</b>          |
| Arthur, Buckner, Buswell, Darlington, Killelt, Lafortune, Mathie, Mayrhofer, Skedgel, Woodward & Goodman | 2020 | DEMCOM: National Evaluation of Dementia Friendly Communities (Executive Summary)                                                                  | <b>Dementia Friendly Communities - various social and leisure activities</b>                                    | UK                                                                 | Evaluation report               | Applied Research Collaboration (ARC) East of England | <b>90</b>          |

|                                      |      |                                                                                                                       |                                       |                                |                                                 |                                                            |           |
|--------------------------------------|------|-----------------------------------------------------------------------------------------------------------------------|---------------------------------------|--------------------------------|-------------------------------------------------|------------------------------------------------------------|-----------|
| Bould, McFadyen & Thomas             | 2019 | Dementia-friendly sport and physical activity guide                                                                   | <b>Sport and exercise initiatives</b> | UK                             | Information booklet                             | Alzheimer's Society                                        | <b>48</b> |
| Brataas, Bjugan, Wille & Hellzen     | 2010 | Experiences of day care and collaboration among people with mild dementia                                             | <b>Day care</b>                       | Norway                         | Journal paper - qual study of a trial programme | Journal of Clinical Nursing                                | <b>65</b> |
| Brooker, Evans, Evans, Watts & Drees | 2017 | Meeting Centres Support Programme UK: Overview, evidence and getting started                                          | <b>Meeting Centres</b>                | Netherlands, Italy, Poland, UK | Information/guide booklet                       | Association for Dementia Studies (University of Worcester) | <b>42</b> |
| Cahill, Pierce & Bobersky            | 2014 | An evaluation report on flexible respite options of the Living Well With Dementia project in Stillorgan and Blackrock | <b>Day care/respite</b>               | Ireland                        | Evaluation report                               | Trinity College Dublin                                     | <b>57</b> |

|                                                                                                                     |      |                                                                                                                                        |                                           |    |                                     |                                       |           |
|---------------------------------------------------------------------------------------------------------------------|------|----------------------------------------------------------------------------------------------------------------------------------------|-------------------------------------------|----|-------------------------------------|---------------------------------------|-----------|
| Carone, Tischler & Dening                                                                                           | 2016 | Football and dementia: A qualitative investigation of a community based sports group for men with early onset dementia                 | <b>Sport and exercise group</b>           | UK | Journal paper - qualitative study   | Dementia                              | <b>58</b> |
| Casey                                                                                                               | 2004 | Early onset dementia: Getting out and about                                                                                            | <b>Small "out and about" social group</b> | UK | Specialist news article             | Journal of Dementia Care              | <b>66</b> |
| Clarke, Keyes, Wilkinson, Alexjuk, Wilcockson, Robinson, Corner & Cattan                                            | 2014 | Organisational space for partnership and sustainability: lessons from the implementation of the National Dementia Strategy for England | <b>Peer support networks</b>              | UK | Journal paper - strategy evaluation | Health & Social Care in the Community | <b>51</b> |
| Daykin, Julier, Tomlinson, Meads, Mansfield, Payne, Duffy, Lane, D'Innocenzo, Burnett, Kay, Dolan, Testoni & Victor | 2016 | Review of the grey literature: music, singing and wellbeing                                                                            | <b>Singing and musical activities</b>     | UK | Review/Report                       | What Works Wellbeing report           | <b>37</b> |

|                                                       |      |                                                                                                               |                                               |       |                                      |                                   |           |
|-------------------------------------------------------|------|---------------------------------------------------------------------------------------------------------------|-----------------------------------------------|-------|--------------------------------------|-----------------------------------|-----------|
| Dean, Silversides, Crampton & Wrigley                 | 2015 | Evaluation of the Bradford Dementia Friendly Communities Programme                                            | <b>Activities and groups in the community</b> | UK    | Evaluation report                    | Joseph Rowntree Foundation report | <b>76</b> |
| Dean, Silversides, Crampton & Wrigley                 | 2015 | Evaluation of the York Dementia Friendly Communities Programme                                                | <b>Activities and groups in the community</b> | UK    | Evaluation report                    | Joseph Rowntree Foundation report | <b>77</b> |
| Gajardo, Aravena, Budinich, Larrain, Fuentes & Gitlin | 2017 | The Kintun program for families with dementia: From novel experiment to national policy (innovative practice) | <b>Day centre and dementia community hub</b>  | Chile | Journal article - program evaluation | Dementia                          | <b>59</b> |
| Glover                                                | 2014 | Running self-help groups in sheltered and extra care accommodation for people who live with dementia          | <b>Self-help social and activity groups</b>   | UK    | Information/guide booklet            | Mental Health Foundation          | <b>43</b> |

|                                                     |      |                                                                                                           |                                                                              |           |                                    |                                                           |           |
|-----------------------------------------------------|------|-----------------------------------------------------------------------------------------------------------|------------------------------------------------------------------------------|-----------|------------------------------------|-----------------------------------------------------------|-----------|
| Gottlieb-Tanaka                                     | 2006 | Creative expression, dementia and the therapeutic environment                                             | <b>Art/creative activities in a day centre environment</b>                   | Canada    | Dissertation/Thesis                |                                                           | <b>63</b> |
| Green & Lakey (Alzheimer's Society)                 | 2013 | Building dementia-friendly communities: a priority for everyone                                           | <b>Dementia Friendly Communities</b> - various social and leisure activities | UK        | Report                             | Alzheimer's Society                                       | <b>49</b> |
| Grinberg, Lagunoff, Phillips, Stern, Goodman & Chow | 2007 | Multidisciplinary design and implementation of a day program specialized for the frontotemporal dementias | <b>Day program</b> for people with FTD                                       | Canada    | Journal paper - program evaluation | American Journal of Alzheimer's Disease & Other Dementias | <b>60</b> |
| Hayes & Williamson                                  | 2007 | Men's Sheds: Exploring the Evidence for Best Practice                                                     | <b>Men's Sheds</b>                                                           | Australia | Evaluation report                  | School of Public Health, La Trobe University              | <b>70</b> |

|                                                                                                               |      |                                                                                                                    |                                                      |       |                                    |                                        |           |
|---------------------------------------------------------------------------------------------------------------|------|--------------------------------------------------------------------------------------------------------------------|------------------------------------------------------|-------|------------------------------------|----------------------------------------|-----------|
| Health Innovation Network South London** (**see also linked films within document plus 2015 HIN Case Studies) | 2015 | Peer Support for People with Dementia Resource Pack                                                                | A range of <b>peer support groups and activities</b> | UK    | Information/guide booklet          | Health Innovation Network South London | <b>80</b> |
| Health Innovation Network South London                                                                        | 2015 | Case Study: Dulwich Helpline and Southwark Churches Care (DH&SCC) – The Dementia Project, Southwark, South London. | <b>Peer support project</b>                          | UK    | Information/guide booklet          | Health Innovation Network South London | <b>52</b> |
| Health Innovation Network South London                                                                        | 2015 | Case Study: The Healthy Living Club (HLC) – A self-directed, dementia-centred community group in Stockwell, London | <b>Peer support group</b>                            | UK    | Information/guide booklet          | Health Innovation Network South London | <b>85</b> |
| Hikichi, Kondo, Takeda & Kawachi                                                                              | 2017 | Social interaction and cognitive decline: Results of a 7-year community intervention                               | <b>Community centres for older people</b>            | Japan | Journal paper - longitudinal study | Alzheimer's & Dementia                 | <b>81</b> |

|                                                                            |      |                                                                                                                                                                  |                                                                      |         |                                                    |                                     |           |
|----------------------------------------------------------------------------|------|------------------------------------------------------------------------------------------------------------------------------------------------------------------|----------------------------------------------------------------------|---------|----------------------------------------------------|-------------------------------------|-----------|
| Hochgraeber, Bartholomeyczik & Holle** (**See also Hochgraeber et al 2017) | 2012 | Low-threshold support for families with dementia in Germany                                                                                                      | <b>"Low threshold" support services including social care groups</b> | Germany | Journal paper - survey protocol                    | BMC Research Notes                  | <b>82</b> |
| Hochgraeber, Von Kutzleben, Bartholomeyczik & Holle                        | 2017 | Low-threshold support services for people with dementia within the scope of respite care in Germany – A qualitative study on different stakeholders' perspective | <b>"Low threshold" support services including social care groups</b> | Germany | Journal paper - qualitative study                  | Dementia                            | <b>38</b> |
| Jackson                                                                    | 2017 | The Debenham Project: Project Blog and Catch-Up                                                                                                                  | Range of local <b>support groups and activities</b>                  | UK      | Project blog newsletter/report                     | Debenham Project                    | <b>87</b> |
| Kelsey & Laditka                                                           | 2005 | Evaluating best practices for social model programs for adults with Alzheimer's disease in South Carolina                                                        | <b>"Social model" day care</b>                                       | US      | Journal paper - review and survey of best practice | Home Health Care Services Quarterly | <b>91</b> |

|                                                                |      |                                                                                                                                                                                   |                                                                             |    |                                                |                                                           |           |
|----------------------------------------------------------------|------|-----------------------------------------------------------------------------------------------------------------------------------------------------------------------------------|-----------------------------------------------------------------------------|----|------------------------------------------------|-----------------------------------------------------------|-----------|
| La Rue, Felten, Duschene, MacFarlane, Price, Zimmerman & Havez | 2013 | Language-enriched exercise plus socialization for older adults with dementia: Translation to rural communities                                                                    | <b>Language, exercise and socialisation program</b>                         | US | Journal paper - trial program in rural setting | Seminars in Speech and Language                           | <b>83</b> |
| La Rue, Felten & Turkstra                                      | 2015 | Intervention of Multi-Modal Activities for Older Adults With Dementia Translation to Rural Communities                                                                            | <b>Language, exercise and socialisation program</b>                         | US | Journal paper - trial program in rural setting | American Journal of Alzheimer's Disease & Other Dementias | <b>53</b> |
| LeBlanc                                                        | 2010 | Integrating behavioral psychology services into adult day programming for individuals with dementia                                                                               | <b>Day care</b> (for people with dementia exhibiting challenging behaviour) | US | Journal paper - program evaluation             | Behavior Modification                                     | <b>93</b> |
| Lockwood                                                       | 2012 | The Debenham Project: A case study of a unique community-led and owned project dedicated to the support of carers of those that have symptoms of dementia and those they care for | Range of local <b>support groups and activities</b>                         | UK | Case study report                              | Community Catalysts                                       | <b>84</b> |



|                                                                                                                                         |      |                                                                                                                             |                                                                                      |                                |                                    |                                     |           |
|-----------------------------------------------------------------------------------------------------------------------------------------|------|-----------------------------------------------------------------------------------------------------------------------------|--------------------------------------------------------------------------------------|--------------------------------|------------------------------------|-------------------------------------|-----------|
| Mangiaracina, Chattat, Farina, Saibene, Gamberini, Brooker, Evans, Evans, Szcześniak, Urbanska, Rymaszewska, Hendricks, Dröes & Meiland | 2017 | Not re-inventing the wheel: the adaptive implementation of the meeting centres support programme in four European countries | <b>Meeting Centres</b>                                                               | Netherlands, Italy, Poland, UK | Journal paper - project evaluation | Aging & Mental Health               | <b>86</b> |
| Mapes, Milton, Nicholls & Williamson (Natural England)                                                                                  | 2016 | Is it nice outside? Consulting people living with dementia and their carers about engaging with the natural environment     | <b>Outdoor activities</b>                                                            | UK                             | Report                             | Natural England report              | <b>64</b> |
| Marshall & Jackson                                                                                                                      | 2015 | Encouraging and supporting the growth of "dementia proactive communities"                                                   | <b>Dementia proactive communities (Range of local support groups and activities)</b> | UK                             | Report                             | Debenham Project & Sue Ryder        | <b>50</b> |
| Mason & Slack                                                                                                                           | 2013 | The Debenham Project: Research into the dementia/memory loss journey for cared-for and carer, 2012-13                       | <b>Range of local support groups and activities</b>                                  | UK                             | Evaluation report - survey         | Norfolk & Suffolk Dementia Alliance | <b>54</b> |

|                                            |      |                                                                                                                                              |                                                                                            |             |                                                            |                                                             |           |
|--------------------------------------------|------|----------------------------------------------------------------------------------------------------------------------------------------------|--------------------------------------------------------------------------------------------|-------------|------------------------------------------------------------|-------------------------------------------------------------|-----------|
| McAiney, Hillier, Stolee, Harvey & Michael | 2012 | 'Throwing a lifeline': the role of First Link in enhancing support for individuals with dementia and their caregivers                        | Information on and links between <b>support services (including groups and activities)</b> | Canada      | Journal paper - evaluation                                 | Neurodegenerative Disease Management (Future Medicine)      | <b>88</b> |
| McDonald & Heath                           | 2009 | Developing services for people with dementia                                                                                                 | <b>General dementia support services</b> in rural areas                                    | UK          | Journal short report feature - review of service provision | Working with Older People: Community Care Policy & Practice | <b>39</b> |
| The Me Myself and I Club                   | 2018 | The Me, Myself and I Club, Briton Ferry: A case study in warm humanity and meaningful co-production                                          | <b>Friendship club and support services</b>                                                | UK (Wales)  | Programme/service report                                   | Me Myself and I Club                                        | <b>46</b> |
| Meiland, Dröes, De Lang & Vernooij-Dassen  | 2004 | Development of a theoretical model for tracing facilitators and barriers in adaptive implementation of innovative practices in dementia care | <b>Meeting centres</b>                                                                     | Netherlands | Journal paper - model development                          | Archives Of Gerontology And Geriatrics Supplement           | <b>55</b> |

|                                           |      |                                                                                                                        |                            |             |                                              |                                 |           |
|-------------------------------------------|------|------------------------------------------------------------------------------------------------------------------------|----------------------------|-------------|----------------------------------------------|---------------------------------|-----------|
| Meiland, Dröes, De Lang & Vernooij-Dassen | 2005 | Facilitators and barriers in the implementation of the Meeting Centres model for people with dementia and their carers | <b>Meeting centres</b>     | Netherlands | Journal paper - model test                   | Health Policy                   | <b>61</b> |
| The Mental Health Foundation              | 2018 | An evaluation of the Standing Together project                                                                         | <b>Peer support groups</b> | UK          | Evaluation report                            | Mental Health Foundation report | <b>73</b> |
| Milligan, Payne, Bingley & Cockshott      | 2015 | Place and wellbeing: shedding light on activity interventions for older men                                            | <b>Men's Sheds</b>         | UK          | Journal paper - qualitative study of program | Ageing & Society                | <b>71</b> |
| Moore                                     | 2002 | Observed affect in a dementia day center: Does the physical setting matter?                                            | <b>Day centre</b>          | US          | Journal paper - case study/field observation | Alzheimer's Care Quarterly      | <b>89</b> |

|                                       |      |                                                                                                                                                                            |                                                             |            |                     |                                              |           |
|---------------------------------------|------|----------------------------------------------------------------------------------------------------------------------------------------------------------------------------|-------------------------------------------------------------|------------|---------------------|----------------------------------------------|-----------|
| Noimuenwai                            | 2012 | Effectiveness of adult day care programs on health outcomes of Thai family caregivers of persons with dementia                                                             | <b>Day care (Thailand)</b>                                  | Thailand   | Dissertation/Thesis |                                              | <b>78</b> |
| NVCO                                  | 2019 | How To Fundraise In Tough Times                                                                                                                                            | <b>Third sector and non-profit organisations in general</b> | UK         | Information guide   | NCVO Knowhow website                         | <b>94</b> |
| Older People's Commissioner for Wales | 2018 | Rethinking respite for people affected by dementia                                                                                                                         | <b>Respite/day services</b>                                 | UK (Wales) | Report              | Older People's Commissioner for Wales report | <b>47</b> |
| Oliver-Watkins, Kendall & Matthews    | 2016 | Sow & Grow: Report from a two-year Social and Therapeutic Horticultural (STH) programme delivering table-top gardening courses to adults in the community aged 50 and over | <b>Gardening groups</b>                                     | UK         | Evaluation report   | Sow & Grow                                   | <b>67</b> |

|                                                    |      |                                                                                                                                         |                                                                                 |         |                                       |                                    |           |
|----------------------------------------------------|------|-----------------------------------------------------------------------------------------------------------------------------------------|---------------------------------------------------------------------------------|---------|---------------------------------------|------------------------------------|-----------|
| Reichet & Wolter                                   | 2017 | Implementing physical activity programs for people with dementia: Results from a German study                                           | <b>Sports club initiatives</b>                                                  | Germany | Poster presentation                   |                                    | <b>44</b> |
| Reichet & Wolter                                   | 2017 | Implementing physical activity programs for people with dementia: Results from a German study                                           | <b>Sports club initiatives</b>                                                  | Germany | Conference abstract                   | Innovation in Aging (Supplement)   | <b>45</b> |
| Rio                                                | 2018 | A Community-Based Music Therapy Support Group for People With Alzheimer's Disease and Their Caregivers: A Sustainable Partnership Model | <b>Music therapy group</b>                                                      | US      | Journal paper - program evaluation    | Frontiers In Medicine              | <b>62</b> |
| Shnall, Agate, Grinberg, Huijbregts, Nguyen & Chow | 2013 | Development of supportive services for frontotemporal dementias through community engagement                                            | <b>Day program for FTD (plus online groups and resources for family carers)</b> | Canada  | Journal paper - review of initiatives | International Review of Psychiatry | <b>96</b> |

|                            |      |                                                                                                                                                             |                                                         |        |                                            |                                                |           |
|----------------------------|------|-------------------------------------------------------------------------------------------------------------------------------------------------------------|---------------------------------------------------------|--------|--------------------------------------------|------------------------------------------------|-----------|
| Solutions Research         | 2016 | Public perceptions and experiences of community-based end of life care initiatives: a qualitative research report                                           | <b>Community-based support initiatives</b> of all kinds | UK     | Report                                     | Public Health England report                   | <b>56</b> |
| Strandenæs, Lund & Rokstad | 2018 | Experiences of attending day care services designed for people with dementia - a qualitative study with individual interviews                               | <b>Day care</b>                                         | Norway | Journal paper - qualitative study          | Aging & Mental Health                          | <b>40</b> |
| Thrive                     | 2012 | Growing4life - A Thrive Community Gardening Project: A practical guide to setting up a community gardening project for people affected by mental ill health | <b>Gardening groups</b>                                 | UK     | Information/guide booklet                  | Thrive (The Society for Horticultural Therapy) | <b>74</b> |
| Tuppen                     | 2012 | The benefits of groups that provide cognitive stimulation for people with dementia                                                                          | <b>Cognitive stimulation clubs</b>                      | UK     | Journal article - overview of intervention | Nursing Older People                           | <b>72</b> |

|                                                                                                                               |      |                                                                                                                                                                                    |                                    |                                |                                         |                                                    |           |
|-------------------------------------------------------------------------------------------------------------------------------|------|------------------------------------------------------------------------------------------------------------------------------------------------------------------------------------|------------------------------------|--------------------------------|-----------------------------------------|----------------------------------------------------|-----------|
| Tuppen & Jones                                                                                                                | 2015 | Cogs Clubs: a helpful activity in early dementia                                                                                                                                   | <b>Cognitive stimulation clubs</b> | UK                             | Specialist news article                 | Journal of Dementia Care                           | <b>75</b> |
| Van Haeften-van Dijk, Meiland, van Mierlo & Dröes                                                                             | 2015 | Transforming nursing home-based day care for people with dementia into socially integrated community day care: Process analysis of the transition of six day care centres          | <b>Meeting centres</b>             | Netherlands                    | Journal paper - process evaluation      | International Journal of Nursing Studies           | <b>79</b> |
| Van Mierlo, Chattat, Evans, Brooker, Saibene, Gamberini, Farina, Scorolli, Szcześniak, Urbańska, Rymaszewska, Dröes & Meiland | 2018 | Facilitators and barriers to adaptive implementation of the Meeting Centers Support Program (MCSP) in three European countries; the process evaluation within the MEETINGDEM study | <b>Meeting centres</b>             | Netherlands, Italy, Poland, UK | Journal paper - program evaluation      | International Psychogeriatrics                     | <b>41</b> |
| Williams & Roberts                                                                                                            | 1995 | Friends in passing: social interaction at an adult day care center                                                                                                                 | <b>Adult day care centre</b>       | US                             | Journal paper - participant observation | International Journal Of Aging & Human Development | <b>68</b> |

|                                                                                             |      |                                                                                |                            |        |                               |                 |           |
|---------------------------------------------------------------------------------------------|------|--------------------------------------------------------------------------------|----------------------------|--------|-------------------------------|-----------------|-----------|
| Wimo, Wallin, Lundgren, Ronnback, Asplund, Mattsson & Krakau (see also Clarkson et al 2017) | 1990 | Impact of Day Care on Dementia Patients—Costs, Well-being and Relatives' Views | <b>Specialist day care</b> | Sweden | Journal paper - cost analysis | Family Practice | <b>95</b> |
|---------------------------------------------------------------------------------------------|------|--------------------------------------------------------------------------------|----------------------------|--------|-------------------------------|-----------------|-----------|
