# Supplementary material for: Sustaining community-based interventions for people affected by dementia long term: the SCI-Dem realist review
Source: PubMed Central journal article supplement — BMJ Open. 2021 Jul 7;11(7):e047789. doi: 10.1136/bmjopen-2020-047789 (PMC8264885; doi:10.1136/bmjopen-2020-047789), 2021-07-07

Supplementary file 5: Diagrams of factors involved in each critical area

Text colour key: **Black text** = sub-outcome directly impacting upon “getting/keeping” **Green text** = likely to help sub-outcome **Red text** = likely to hinder sub-outcome

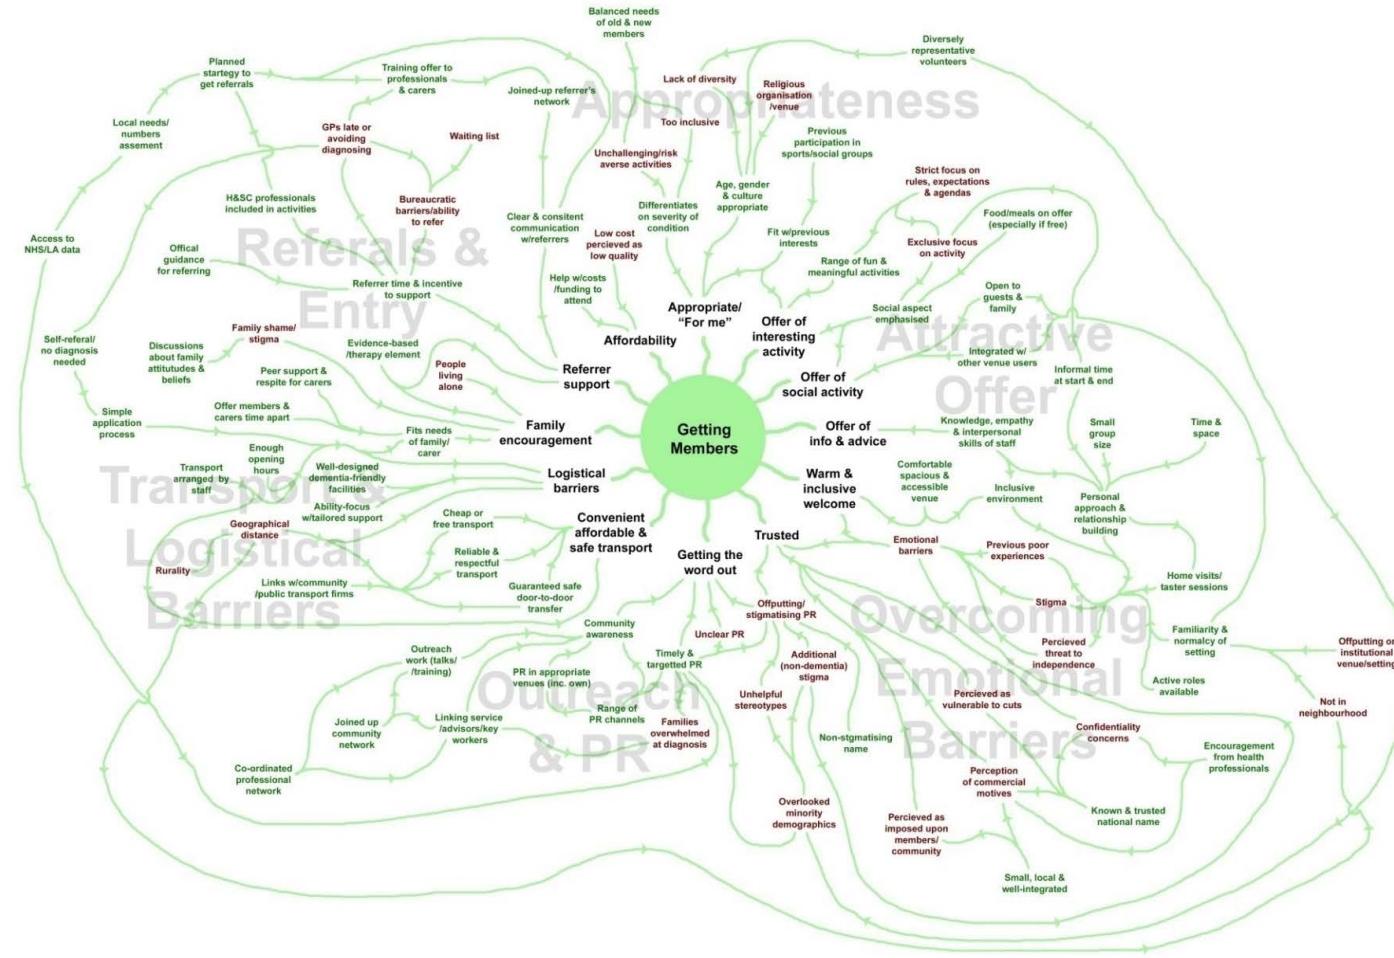

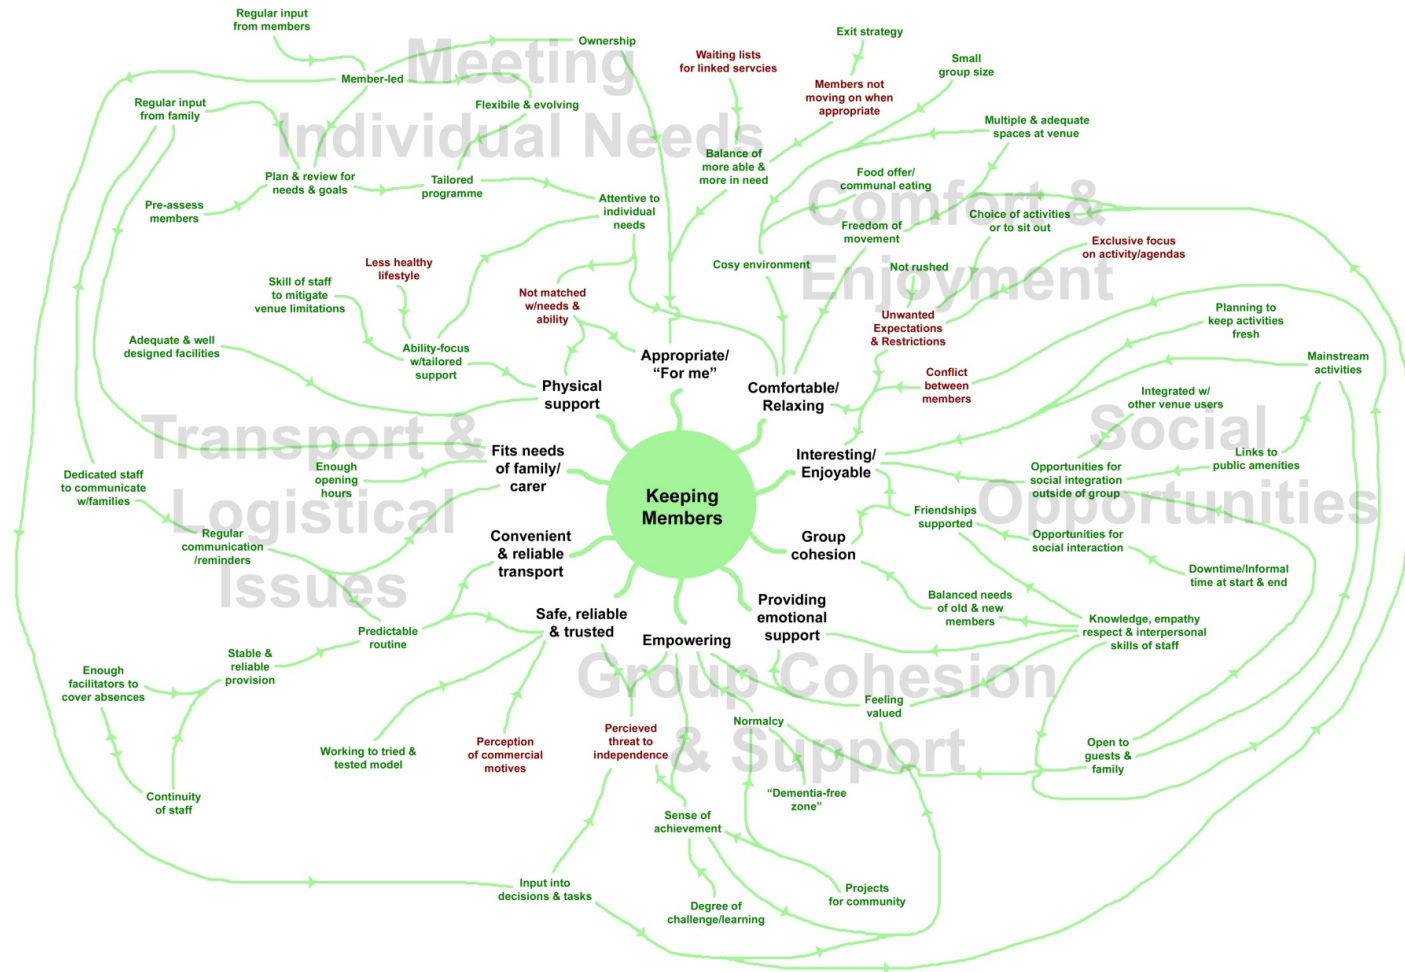

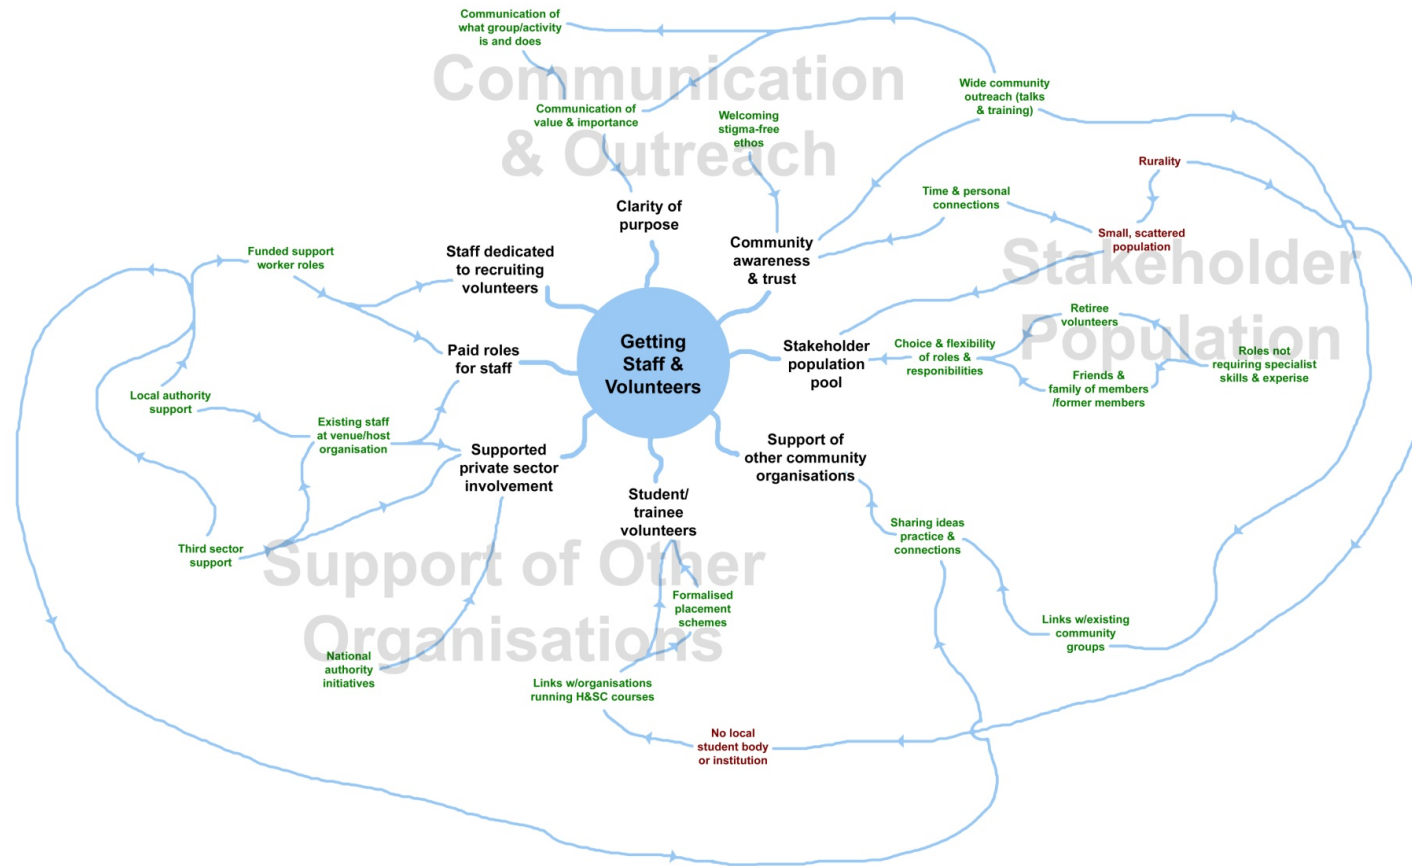

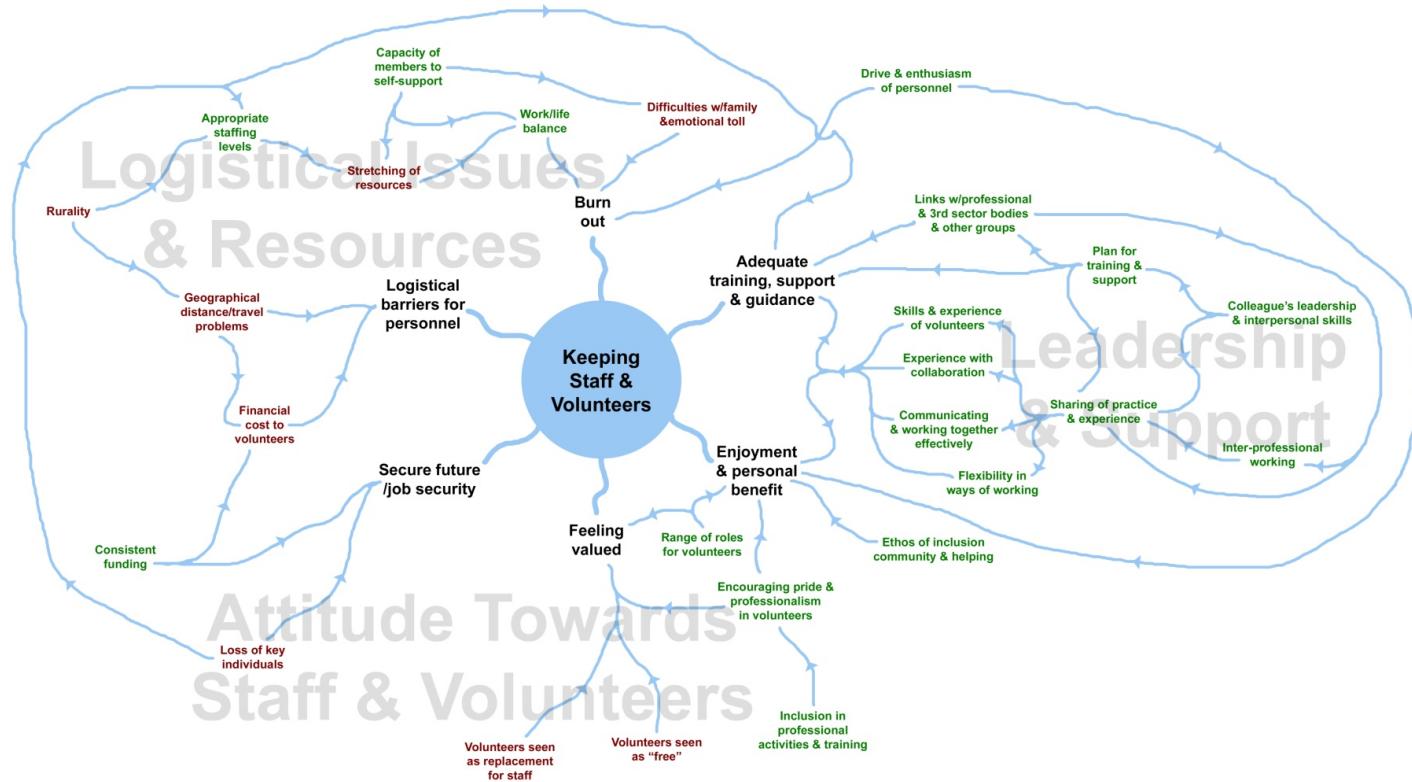



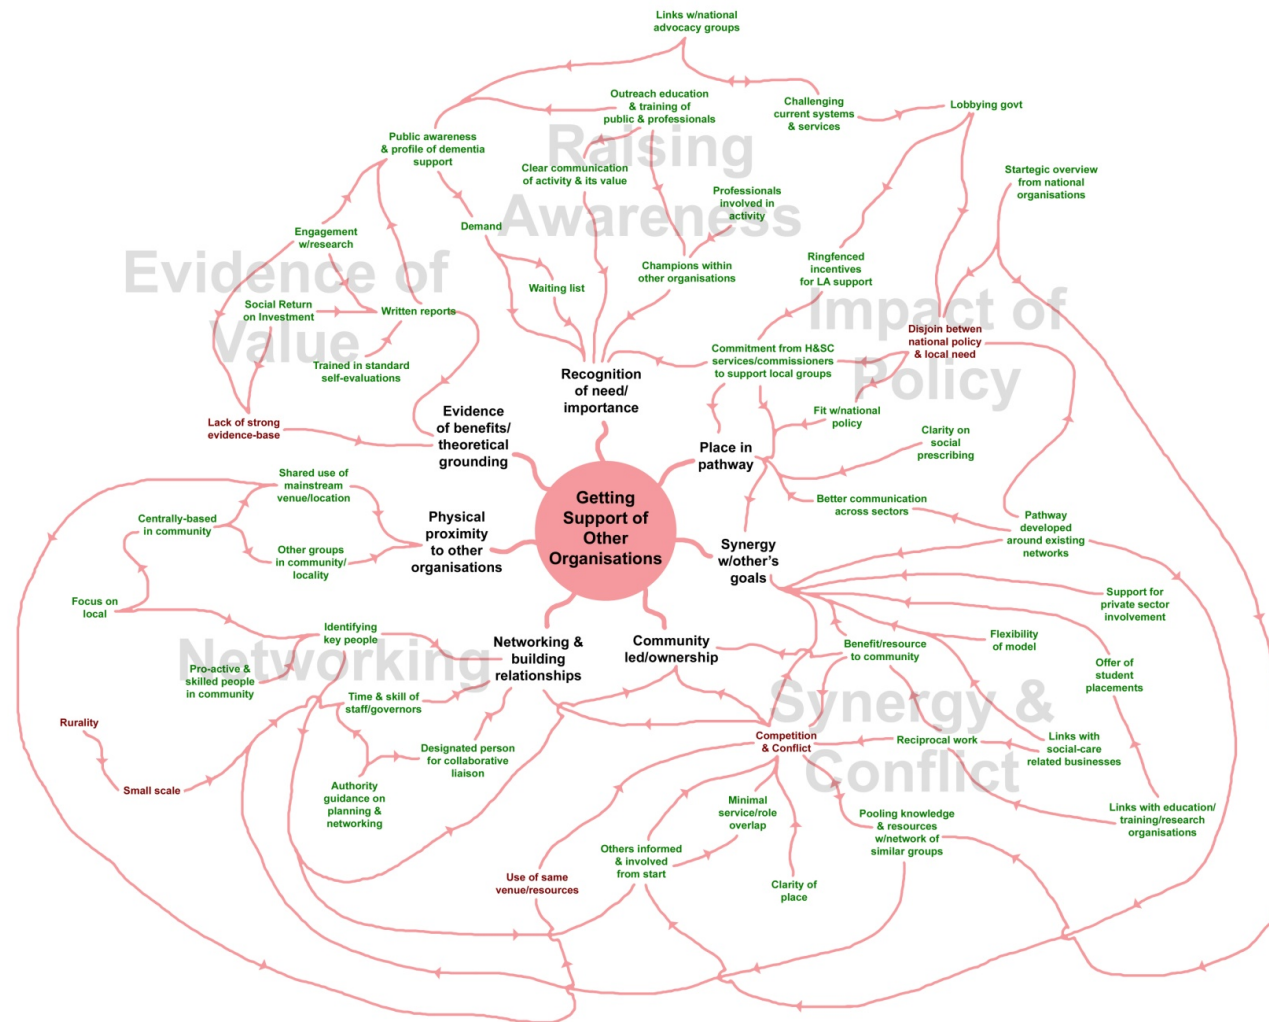

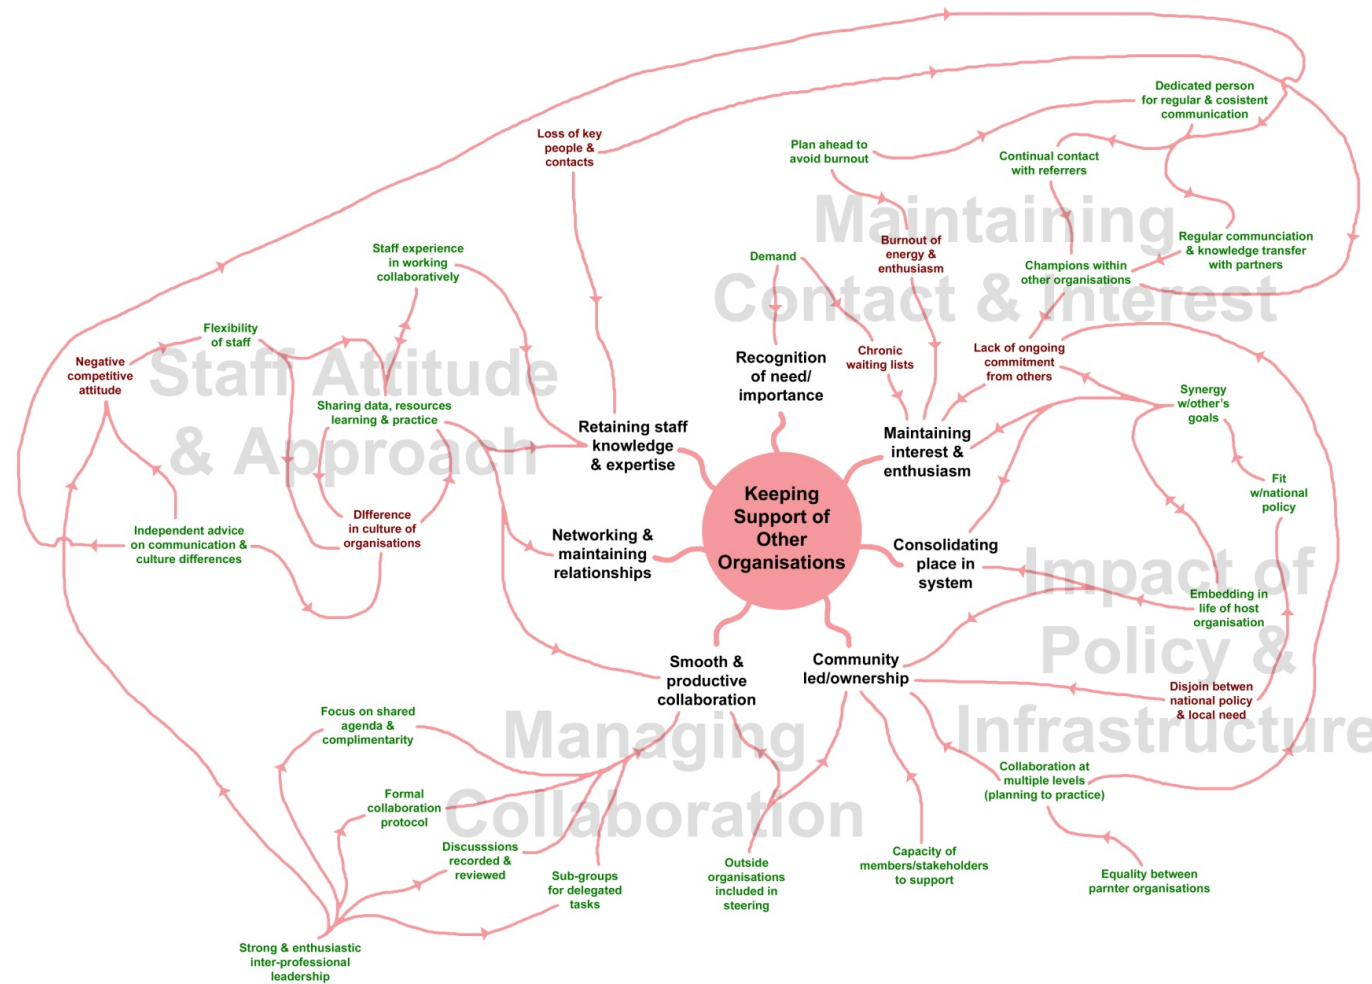

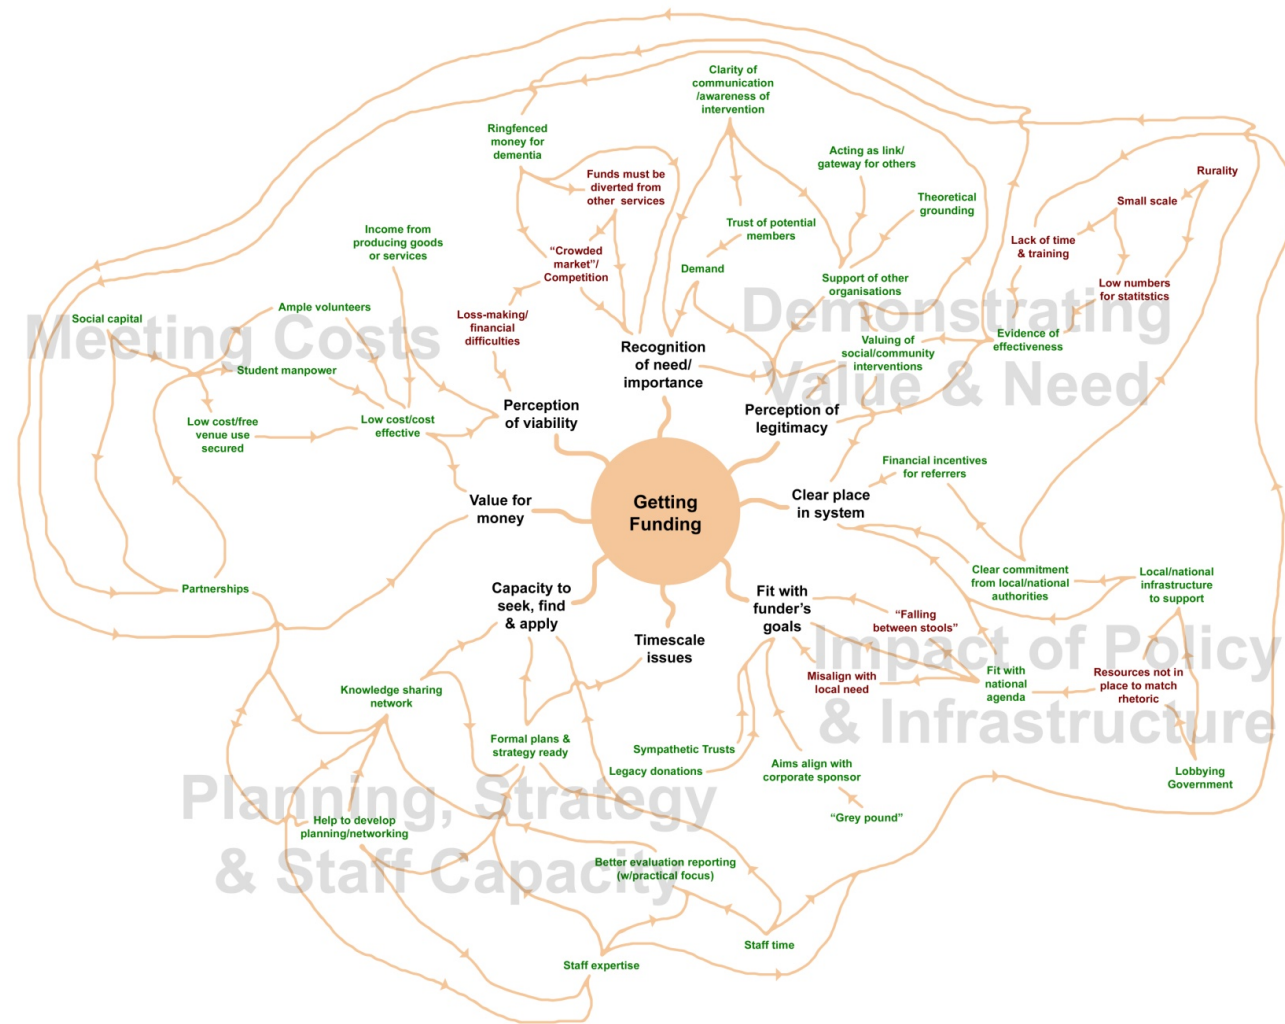

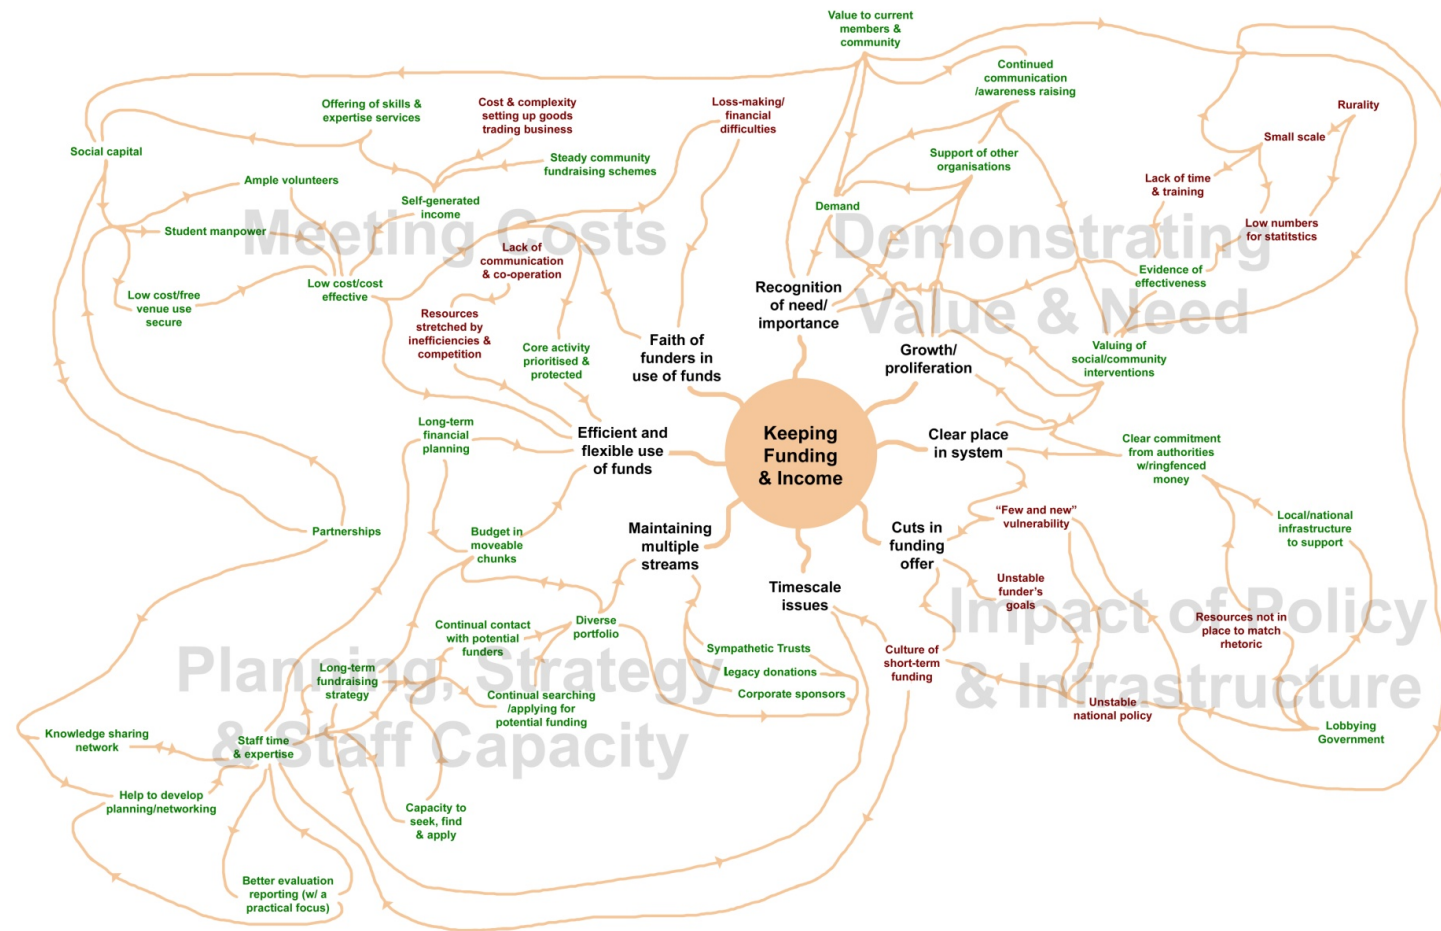

Supplement: bmjopen-2020-047789supp005.pdf [file bmjopen-2020-047789supp005.pdf]
